# Supplementary material for: Multi-phosphine-chelated iron-carbide clusters via redox-promoted ligand exchange on an inert hexa-iron-carbide carbonyl cluster, [Fe6(μ6-C)(μ2-CO)4(CO)12]2−
Source: Royal Society of Chemistry journal article supplement (doi:10.1039/d4sc01370k), 2024-01-01
Supplement: d4sc01370k1.pdf [file d4sc01370k1.pdf]

*Supporting Information Part I for:*

# **Multi-Phosphine-Chelated Iron Carbide Clusters via Redox-Promoted Ligand Exchange on $[\text{Fe}_6(\mu_6\text{-C})(\mu_2\text{-CO})_4(\text{CO})_{12}]^{2-}$**

Caitlyn R. Cobb, Ren K. Ngo, Emily J. Dick, Vincent M. Lynch  
and Michael J. Rose\*

*Department of Chemistry, The University of Texas at Austin  
Austin, TX 78712 USA*

| <b>Contents</b>                                                                                                                           | <b>Page</b>   |
|-------------------------------------------------------------------------------------------------------------------------------------------|---------------|
| <b>Synthetic and Experimental Procedures</b>                                                                                              | <b>S3-10</b>  |
| <b>Figure S1.</b> FT-IR data for <b>1</b> .                                                                                               | <b>S11</b>    |
| <b>Figures S2-S3.</b> FT-IR spectra of the synthesis of <b>2</b> in DCE and MeCN.                                                         | <b>S12-13</b> |
| <b>Figure S4.</b> FT-IR spectra for <b>1</b> , the formation of <b>2</b> in DCE, and the addition of PPhMe <sub>2</sub> in DCE.           | <b>S14</b>    |
| <b>Figures S5.</b> <sup>31</sup> P{ <sup>1</sup> H} NMR spectrum of the addition of PPhMe <sub>2</sub> in DCE to <b>2</b> .               | <b>S15</b>    |
| <b>Figures S6-7.</b> <sup>13</sup> C NMR and IR spectra for <b>3</b> .                                                                    | <b>S16-17</b> |
| <b>Figures S8-11.</b> <sup>1</sup> H NMR, <sup>13</sup> C NMR, <sup>31</sup> P{ <sup>1</sup> H} NMR and IR spectra for <b>4</b> .         | <b>S18-21</b> |
| <b>Figures S12-16.</b> <sup>1</sup> H NMR, <sup>13</sup> C NMR, <sup>31</sup> P{ <sup>1</sup> H} NMR, NOESY and IR spectra for <b>5</b> . | <b>S22-26</b> |
| <b>Figures S17-S20.</b> <sup>1</sup> H NMR, <sup>13</sup> C NMR, <sup>31</sup> P{ <sup>1</sup> H} NMR, and IR spectrum for <b>6</b> .     | <b>S27-30</b> |
| <b>Figures S21-22.</b> <sup>31</sup> P{ <sup>1</sup> H} NMR and IR spectra for <b>7</b> .                                                 | <b>S31-32</b> |
| <b>Figures S23-26.</b> <sup>1</sup> H NMR, <sup>13</sup> C NMR, <sup>31</sup> P{ <sup>1</sup> H} NMR and IR spectra for <b>8</b> .        | <b>S33-36</b> |
| <b>Figures S27-30.</b> <sup>1</sup> H NMR, <sup>13</sup> C NMR, <sup>31</sup> P{ <sup>1</sup> H} NMR and IR spectra for <b>9</b> .        | <b>S37-40</b> |
| <b>Figures S31-34.</b> <sup>1</sup> H NMR, <sup>13</sup> C NMR, <sup>31</sup> P{ <sup>1</sup> H} NMR and IR spectra for <b>10</b> .       | <b>S41-44</b> |
| <b>Figures S35.</b> IR spectrum for <b>11</b> .                                                                                           | <b>S45</b>    |
| <b>Table S1.</b> IR spectral data for various carbidocarbonyl clusters.                                                                   | <b>S46</b>    |
| <b>Figures S36.</b> FT-IR spectra of the synthesis of <b>9</b> from <b>8</b> and MeCN.                                                    | <b>S47</b>    |

|                                                                                                                                                                                                        |                 |
|--------------------------------------------------------------------------------------------------------------------------------------------------------------------------------------------------------|-----------------|
| <b>Figures S37–45.</b> ORTEP diagrams of X-ray crystal structures for <b>3–11</b> .<br>Experimental details for XRD and structure solution of <b>3–11</b> .                                            | <b>S47-61</b>   |
| <b>Table S2-S3.</b> Crystal data and refinement parameters for <b>3-11</b> .                                                                                                                           | <b>S62-64</b>   |
| <b>Tables S4.</b> Selected bond distances for <b>3</b> .                                                                                                                                               | <b>S65-66</b>   |
| <b>Tables S5.</b> Selected bond angles for <b>3</b> .                                                                                                                                                  | <b>S66</b>      |
| <b>Figure S46.</b> Fe <sub>5</sub> core framework and atom number visualization.                                                                                                                       | <b>S67</b>      |
| <b>Tables S7.</b> Selected bond angles for <b>4, 5, and 8</b> .                                                                                                                                        | <b>S67</b>      |
| <b>Figure S47.</b> Visualization of Fe5 equatorial plane and C-plane distance.                                                                                                                         | <b>S67</b>      |
| <b>Tables S8.</b> Selected bond distances for <b>4, 5, and 8</b> .                                                                                                                                     | <b>S68</b>      |
| <b>Table S9.</b> Selected bond distances for 3-iron cluster units in <b>6, 7, 10, and 11</b> .                                                                                                         | <b>S69</b>      |
| <b>Table S10.</b> Selected bond angles for 3-iron cluster units in <b>6 and 7</b> .                                                                                                                    | <b>S69</b>      |
| <b>Table S11.</b> Selected bond angles for 3-iron cluster units in <b>10 and 11</b> .                                                                                                                  | <b>S70</b>      |
| <b>Figure S48.</b> Visualization of simplified triphos and Fe <sub>4</sub> core of <b>9</b> .                                                                                                          | <b>S70</b>      |
| <b>Table S12.</b> Selected bond distances for <b>9</b> and literature values for other 4-Fe clusters.                                                                                                  | <b>S70</b>      |
| <b>Figure S49.</b> Visualization of Fe <sub>4</sub> butterfly dihedral angle and primary Fe-CFe angle.                                                                                                 | <b>S71</b>      |
| <b>Table S13.</b> Selected bond angle and torsion for <b>9</b> .                                                                                                                                       | <b>S71</b>      |
| Computational modeling of <b>2</b> : Design of approach and remarks on screening of functionals and basis sets using [Fe <sub>5</sub> (μ <sub>5</sub> -C)(CO) <sub>15</sub> ], <b>Tables S14-15</b>    | <b>S72-73</b>   |
| <b>Tables S16–S17.</b> Results of DFT functional screening for [Fe <sub>5</sub> (μ <sub>5</sub> -C)(CO) <sub>15</sub> ]: Selected bond distances, angles and RMSDs compared to experimental structure. | <b>S74-75</b>   |
| <b>Tables S18–S21.</b> Results of DFT functional screening for [Fe <sub>5</sub> (μ <sub>5</sub> -C)(CO) <sub>15</sub> ]: Frequency simulations.                                                        | <b>S76-86</b>   |
| <b>Figures S50-60.</b> Results of DFT functional screening for [Fe <sub>5</sub> (μ <sub>5</sub> -C)(CO) <sub>15</sub> ]: Frequency simulations.                                                        | <b>S86-97</b>   |
| <b>Tables S22.</b> Results of DFT functional screening for [Fe <sub>5</sub> (μ <sub>5</sub> -C)(CO) <sub>15</sub> ]: RMSDs compared to experimental structure and HOMO-LUMO gaps.                      | <b>S98</b>      |
| Remarks on computational method screening with [Fe <sub>5</sub> (μ <sub>5</sub> -C)(CO) <sub>15</sub> ].                                                                                               | <b>S98</b>      |
| <b>Figure S61.</b> Visualization of optimized geometry [Fe <sub>5</sub> (μ <sub>5</sub> -C)(CO) <sub>15</sub> ] with C-PCM.                                                                            | <b>S99</b>      |
| <b>Table S23.</b> Vibrational analysis of [Fe <sub>5</sub> (μ <sub>5</sub> -C)(CO) <sub>15</sub> ] with C-PCM.                                                                                         | <b>S99-101</b>  |
| <b>Remarks on model of 2 with and without C-PCM.</b>                                                                                                                                                   | <b>S101-102</b> |
| <b>Tables S24.</b> Comparisons of modeled geometries of <b>2</b> with C-PCM to gas-phase result.                                                                                                       | <b>S102</b>     |
| <b>Tables S25.</b> Comparisons of modeled vibrational spectra of <b>2</b> with C-PCM to gas-phase result.                                                                                              | <b>S102-104</b> |
| <b>Table S26.</b> Full coordinates of modeled gas-phase geometry for <b>2</b> .                                                                                                                        | <b>S105</b>     |

|                                                                                |                 |
|--------------------------------------------------------------------------------|-----------------|
| <b>Figure S62.</b> Calculated IR spectrum <b>2</b> .                           | <b>S106</b>     |
| <b>Figure S63.</b> Calculated optimized gas phase geometry of <b>3</b> .       | <b>S107</b>     |
| <b>Table S27.</b> Full coordinates of modeled gas-phase geometry of <b>3</b> . | <b>S108-109</b> |
| <b>Figure S64.</b> Calculated IR spectrum <b>3</b> .                           | <b>S110</b>     |
| <b>References</b>                                                              | <b>S111-113</b> |

## Materials and Methods

### Solvents and Reagents

All non-deuterated solvents were dried through an alumina column system (Pure Process Technology). Fluorobenzene (FPh) (TCI America) was purchased as 99.0+% purity, and 1,2-dichloroethane (Fisher Chemical) was purchased as Certified ACS grade. All other solvents were purchased as HPLC grade from EMD, Fisher, Macron, TCI or J.T. Baker. Deuterated solvents ( $d_8$ -toluene and  $d_3$ -MeCN) were purchased from Acros Organics and used as received.  $C_6D_6$  was purchased from Cambridge Isotopes and underwent three freeze-pump-thaw cycles prior to use.

$(Et_4N)_2[Fe_6(\mu_6-C)(CO)_{16}]$  was prepared as described in our previous report.<sup>1</sup>  $Fe(CO)_5$  was purchased from Strem Chemicals and  $Na(s)$  was purchased from Fisher Chemical; both were used as received. Diethylene glycol was purchased from Acros Organics and used as received. Triphenylphosphine ( $PPh_3$ ), dimethylphenyl phosphine ( $PMe_2Ph$ ) and bis(2-diphenylphosphinoethyl)phenylphosphine (linear Triphos) were purchased from Acros Organics and used as received. Bis(diphenylphosphino)ethane (dppe) and (diphenylphosphino)propane (dppp) was purchased from TCI and used as received. The tripodal Triphos ligand 1,1,1-tris(diphenylphosphinomethyl)ethane and bis(diphenylphosphino)benzene (bdpb) were purchased from Alfa Aesar and used as received.

### Physical Measurements

The NMR spectra (except when otherwise indicated) were acquired at ambient temperature on a Varian VNMRs 600 MHz instrument equipped with a 5 mm AutoXDB PFG probe. The NOESY spectrum of **4** was obtained at ambient temperature.  $^{31}P$  NMR spectra were recorded at ambient temperature on a Varian 400 MHz NMR unless otherwise indicated. The probe was referenced to an external sample of 85%  $H_2PO_4$ . Solvent impurities were assigned according to Goldberg *et al.*<sup>2</sup> IR spectra were acquired using a Bruker Alpha spectrometer equipped with a diamond ATR crystal.

*Caution:* Metal carbonyls are extremely toxic. It is advised to handle these compounds in well-ventilated fume hoods under an inert gas atmosphere.

### Experimental Details

*Reaction of 2 with  $PPhMe_2$  and characterization of previously reported complex  $[Fe_5(\mu_5-C)(CO)_{12}(PMe_2Ph)_3]$*

In a glove box under N<sub>2</sub> atmosphere, a 20 mL screw-top vial was charged with a violet solution of (Et<sub>4</sub>N)<sub>2</sub>[Fe<sub>6</sub>(μ<sub>6</sub>-C)(CO)<sub>16</sub>] (300 mg, 0.284 mmol) in approximately 10 mL MeCN. Solid [Fc]PF<sub>6</sub> (198 mg, 0.597 mmol) was added, and the reaction mixture was stirred vigorously at room temperature for approximately 1 h, affording a red black solution (oxidation verified by FT-IR analysis). PMe<sub>2</sub>Ph (approximately 0.3 mL, 2.56 mmol) was added, and the reaction was stirred for 27h turning red brown.

Dropcast IR of reaction in **Figure S4**.

<sup>31</sup>P{<sup>1</sup>H}NMR (162 MHz, pentane, ppm) (**Figure S5**): δ 22.14 (s, 2P), 18.45 (s, 1P) ppm.

### [Fe<sub>6</sub>(μ<sub>6</sub>-C)(μ<sub>2</sub>-CO)(CO)<sub>16</sub>] (**3**)

In a glovebox under N<sub>2</sub> atmosphere, a 20 mL screw-top vial was charged with a violet solution of (Et<sub>4</sub>N)<sub>2</sub>[Fe<sub>6</sub>(μ<sub>6</sub>-C)(CO)<sub>16</sub>] (132 mg, 0.125 mmol) in 10 mL of DCM. Solid [Fc]PF<sub>6</sub> (103 mg, 0.313 mmol) was added, and the reaction mixture was stirred vigorously at room temperature for 10 min, affording a black solution. Volatiles were removed *in vacuo*, affording a black solid. The solid was washed with pentane (2×10 mL), Et<sub>2</sub>O (2×10 mL), and toluene (5 mL) to remove ferrocene and Fe<sub>5</sub>(μ<sub>5</sub>-C)(CO)<sub>15</sub>. Extraction into FPh afforded a black solution from which black diffraction quality prisms of **3** were grown by slow evaporation at −20 °C. Yield: 42.3 mg, 0.0512 mmol (41.1%).

<sup>13</sup>C{<sup>1</sup>H} NMR (151 MHz, C<sub>6</sub>D<sub>6</sub>, ppm) (**Figure S6**): CO at δ 212.24, 212.11, 209.45 ppm

IR (solid state, in cm<sup>−1</sup>) (**Figure S7**): ν(CO) 2096 (w), 2023 (s), 1828 (m)

Anal. Calc.: C, 26.26; H 0.00; N 0.00

Anal. Exp.: C, 25.99; H, 0.26; N, 0.10

### [Fe<sub>5</sub>(μ<sub>5</sub>-C)(CO)<sub>14</sub>PPh<sub>3</sub>] (**4**)

In a glovebox under N<sub>2</sub> atmosphere, a 20 mL screw-top vial was charged with a violet solution of (Et<sub>4</sub>N)<sub>2</sub>[Fe<sub>6</sub>(μ<sub>6</sub>-C)(CO)<sub>16</sub>] (300 mg, 0.284 mmol) in 10 mL of MeCN. Solid [Fc]PF<sub>6</sub> (200 mg, 0.604 mmol) was added, and the reaction mixture was stirred vigorously at room temperature for 1 h, affording a red-black solution (oxidation verified by FT-IR analysis). PPh<sub>3</sub> (684 mg, 2.559 mmol) was added, and the reaction was stirred for 24 h, turning red-brown. Volatiles were removed *in vacuo*, affording an oily black solid which were not dried to powders (drying completely prevents extraction of **4** into Et<sub>2</sub>O; this can be mitigated by adding a drop of MeCN after pentane extraction). The solid was washed with pentane (3×15 mL) to remove ferrocene and unreacted phosphine. Further extraction of the solid with Et<sub>2</sub>O gave a dark red solution from which black, block crystals of **3** were grown by slow evaporation at −20 °C. Yield: 34.6 mg, 0.0364 mmol (13%).

<sup>1</sup>H NMR (600 MHz, C<sub>6</sub>D<sub>6</sub>, ppm) (**Figure S8**): δ 7.93 (s 1H), 7.05 (t 2H), 6.93 (s 2H, overlapped free PPh<sub>3</sub> peak); free PPh<sub>3</sub>: 7.32, 6.98, possible overlap with solvent peak

<sup>31</sup>P{<sup>1</sup>H}NMR (162 MHz, Et<sub>2</sub>O, ppm) (**Figure S10**): δ 53.73, free PPh<sub>3</sub> -5.34

<sup>13</sup>C{<sup>1</sup>H} NMR (151 MHz, C<sub>6</sub>D<sub>6</sub>, ppm) (**Figure S9**): δ 490.11 (μ<sub>5</sub>-C), 214.04 (CO), 212.93 (CO), δ 133.54, 133.47 (d, *J* = 42 Hz); 131.27, 131.25 (d, *J* = 12 Hz); 130.13 (s); 128.89, 128.83 (d, *J* = 36 Hz)

IR (solid state, in  $\text{cm}^{-1}$ ) (**Figure S11**):  $\nu(\text{CO})$  2079 (m), 2005 (s), 1987 (s), 1959 (s)

Anal. Calc.: C, 41.91; H, 1.60; N 0.00

Anal. Exp.: C 42.42; H, 1.91; N, 0.14

### **$\text{NEt}_4[\text{Fe}_5(\mu_5\text{-C})(\mu_2\text{-H})(\text{CO})_{13}\text{PPh}_3]$ (**5**)**

During the workup described in the synthesis of **4**, the FPh extraction was collected and was passed through a silica gel column (2.5 cm  $\times$  8 cm), eluting a dark pink solution with FPh before yielding a reddish-black elution of **5** was collected from the silica in DCE. This solution was passed through a Celite filter, and vapor diffusion of  $\text{Et}_2\text{O}$  into FPh over several days at room temperature afforded dark-red plate crystals suitable for X-ray diffraction.

Yield: 34.3 mg, 0.0325 mmol (11%)

$^1\text{H}$  NMR (600 MHz,  $\text{CD}_3\text{CN}$ , ppm) (**Figure S12**): 7.42, 7.37 (aryl CH, 15H) 3.16, 3.15 ( $\text{Et}_4\text{N}$   $\text{CH}_2$ , 8H), 1.21 ( $\text{Et}_4\text{N}$   $\text{CH}_3$ , 12H),  $-11.71$ ,  $-11.75$  (hydride,  $^2J_{\text{HP}} = 24$  Hz)

$^{13}\text{C}\{^1\text{H}\}$  NMR (151 MHz,  $\text{CD}_3\text{CN}$ , ppm) (**Figure S13**): interstitial carbide peak at  $\delta$  488.63 ppm, one singlet CO resonance at  $\delta$  -219.31 ppm,  $\text{PPh}_3$  aryl-C (doublets) at  $\delta$  136.14, 134.54, 131.17, 129.00;  $\text{NEt}_4$  at  $\delta$  53.00, 7.60

$^{31}\text{P}\{^1\text{H}\}$  NMR (162 MHz, FPh, ppm) (**Figure S14**):  $\delta$  62.17

NOESY (150.8 MHz,  $\text{CD}_3\text{CN}$ ) (**Figure S15**): coupling between peaks at 7.39 and  $-11.72$  ppm

Selected IR peaks in  $\text{cm}^{-1}$ , solid,  $\nu(\text{CO})$  (**Figure S16**): 2041 (m), 1988 (s), 1963 (s), 1947 (s), 1927 (s), 1898 (s), 1850 (s), 1817 (s), 1797 (s).

### *Reaction of **2** with bisphosphines dppe and dppp*

Reaction of **2** with dppe:

In a glovebox under  $\text{N}_2$  atmosphere, a 20 mL screw-top vial was charged with a violet solution of  $(\text{Et}_4\text{N})_2[\text{Fe}_6(\mu_6\text{-C})(\text{CO})_{16}]$  (302 mg, 0.286 mmol) in 15 mL of DCE. Solid  $[\text{Fc}]\text{PF}_6$  (209 mg, 0.631 mmol) was added, and the reaction mixture was stirred vigorously at room temperature for 1 h, affording a black solution (oxidation verified by FT-IR analysis). Dppe (229 mg, 0.575 mmol) was added, and the reaction was stirred for 24 h, turning dark brown. Volatiles were removed *in vacuo*, affording an oily black solid. During the course of the reaction workup for the dppe substitution reaction, 19 distinct fractions were collected by first extracting with solvents moving from non-polar to polar (namely pentane, toluene,  $\text{Et}_2\text{O}$ , FPh, DCE and MeCN) followed by performing silica gel columns on the extractions. This afforded three pentane column fractions, three toluene fractions, three  $\text{Et}_2\text{O}$  fractions, five FPh fractions, three DCE fractions and one MeCN fraction. Dropcast FT-IR spectra revealed that all exhibited features corresponding to carbonyls, and as such crystallizations were attempted. However, due to the multitude of fractions each crystallization was on a small scale and ultimately unsuccessful.

Reaction of **2** with dppp:

In a glovebox under N<sub>2</sub> atmosphere, a 20 mL screw-top vial was charged with a violet solution of (Et<sub>4</sub>N)<sub>2</sub>[Fe<sub>6</sub>(μ<sub>6</sub>-C)(CO)<sub>16</sub>] (300 mg, 0.284 mmol) in 15 mL of DCE. Solid [Fc]PF<sub>6</sub> (204 mg, 0.616 mmol) was added, and the reaction mixture was stirred vigorously at room temperature for 1 h, affording a black solution (oxidation verified by FT-IR analysis). Dppp (235 mg, 0.570 mmol) was added, and the reaction was stirred for 24 h, turning dark brown. Volatiles were removed *in vacuo*, affording an oily black-brown solid.

For the dppp substitution reaction 18 distinct fractions were collected after silica gel chromatography, all demonstrating carbonyl stretches in the FT-IR spectra, yet these also eluded structural characterization. As such, we hypothesize that since there was no major product fraction, rather an apparent abundance of carbonyl-containing products, cluster fragmentation occurred transforming the iron-carbonyl carbide cluster into smaller, iron-carbonyl-phosphine complexes.

#### [Fe<sub>3</sub>(μ<sub>3</sub>-CH)(μ<sub>3</sub>-CO)(CO)<sub>9</sub>][(bdpb)<sub>2</sub>Fe(MeCN)<sub>2</sub>] (**6**)

In a glovebox under N<sub>2</sub> atmosphere, a 20 mL screw-top vial was charged with a violet solution of (Et<sub>4</sub>N)<sub>2</sub>[Fe<sub>6</sub>(μ<sub>6</sub>-C)(CO)<sub>16</sub>] (**1**: 261 mg, 0.247 mmol) in 10 mL of MeCN. Then, two equiv of solid [Fc]PF<sub>6</sub> (186 mg, 0.562 mmol) were added, and the reaction mixture was stirred vigorously at room temperature for ~10 min, affording a red-black solution (oxidation verified by FT-IR analysis). Next, two equiv of bdpb (225 mg, 0.504 mmol) were added, and the reaction was stirred overnight, turning reddish-brown. Volatiles were removed *in vacuo*, affording oily black solids. The solid was washed with pentane until colorless (8×10 mL) to remove ferrocene and unreacted phosphine; no ν(CO) features were present in IR analysis of the pentane extraction. Extraction of the remaining dark residue with Et<sub>2</sub>O afforded a pale reddish-pink solution, which upon slow evaporation provided red crystalline shards of **6** (first crop). Further extraction of the remaining crude solid with FPh affords a more concentrated, deep red solution of **6**. Filtration through Celite followed by vapor diffusion of pentane into Et<sub>2</sub>O over 24 h provided dark, red plate crystals of **6**.

Yield: 17.4 mg (4.81%).

<sup>1</sup>H NMR (600 MHz, CD<sub>3</sub>CN, ppm) (**Figure S18**): δ 12.36 (Fe<sub>3</sub>-CH, s), 7.67 (m), 7.54 (m), 7.47 (m), 7.42 (m), 7.32 (m), 7.16 (m), 7.10 (t), 6.69 (d), 6.38 (d), 1.96, (MeCN)

<sup>13</sup>C {<sup>1</sup>H} NMR (151 MHz, CD<sub>3</sub>CN, ppm) (**Figure S19**): δ 223.24, 221.25 (CO), δ 145.58, 137.40, 135.85, 134.65, 133.06, 131.08, 129.38, 129.13 (aryl-C)

<sup>31</sup>P{<sup>1</sup>H}NMR (243 MHz, CD<sub>3</sub>CN, ppm) (**Figure S17**): δ 98.35; contamination from some other minor decay products at 69.93, 66.09, 65.56. Possible free ligand at δ -7.91.

Selected IR peaks, solid, in cm<sup>-1</sup>, ν(CO) (**Figure S20**): 2051 (w), 1977 (s), 1949 (s), 1901 (s), 1725 (m).

Anal. Calc.: C, 60.40; H, 3.72; N 1.88

Anal. Exp.: C, 65.60; H, 4.55; N, 0.64

#### [Fe<sub>3</sub>{μ<sub>3</sub>-C-P(Ph)<sub>2</sub>C<sub>2</sub>H<sub>4</sub>(PhP)C<sub>2</sub>H<sub>4</sub>(PPh<sub>2</sub>)}(CO)<sub>8</sub>] (**7**)

In a glovebox under N<sub>2</sub> atmosphere, a 20 mL screw-top vial was charged with a violet solution of (Et<sub>4</sub>N)<sub>2</sub>[Fe<sub>6</sub>(μ<sub>6</sub>-C)(CO)<sub>16</sub>] (257 mg, 0.243 mmol) in approximately 20 mL of MeCN. Solid [Fc]PF<sub>6</sub> (175 mg, 0.529 mmol) was added, and the reaction mixture was stirred vigorously at room temperature for approximately 10 minutes, and oxidation was verified by dropcast FT-IR of the reaction mixture. The linear Triphos ligand (150 mg, 0.281 mmol) was added, and the reaction was stirred for 2.5 h, turning reddish-brown. Solvent was removed *in vacuo*, with MeCN thoroughly removed by repeatedly triturating the semi-dried reaction mixture in Et<sub>2</sub>O and then removing solvent until black powder remained. The solid was washed with pentane (2×15 mL) to remove ferrocene and unreacted phosphine. No ν(CO) features were found by IR analysis of the pentane extraction. The crude solids were then washed Et<sub>2</sub>O, affording a pale brown solution. Extraction with toluene afforded a deep coffee-brown solution, which was filtered over Celite. Vapor diffusion of pentane into the toluene extraction at –20 °C over multiple weeks afforded brown needle crystals of **7** in brown oils, which provided atom connectivity via X-ray diffraction. Separation of the oils from the crystals proved intractable and product purification was not feasible.

<sup>31</sup>P{<sup>1</sup>H} NMR (243 MHz, *d*<sup>6</sup>-benzene, ppm) (**Figure S21**): δ 123.57 (s, 1P), 90.78 (s, 2P)

Selected IR peaks, solid, ν(CO) in cm<sup>–1</sup>(**Figure S22**): 2061 (w), 1963 (s), 1881 (s).

#### [Fe<sub>5</sub>(μ<sub>5</sub>-C)(κ<sub>1</sub>-Triphos)(CO)<sub>14</sub>] (**8**)

In a glovebox under N<sub>2</sub> atmosphere, a 20 mL screw-cap vial was charged with a violet- solution of (Et<sub>4</sub>N)<sub>2</sub>[Fe<sub>6</sub>(μ<sub>6</sub>-C)(CO)<sub>16</sub>] (258 mg, 0.244 mmol) in approximately 10 mL of DCE. Solid [Fc]PF<sub>6</sub> (183 mg, 0.553 mmol) was added, and the reaction mixture was stirred vigorously at room temperature for fifteen minutes, affording a dark brown solution. The tripodal Triphos ligand (300 mg, 0.480 mmol) was added, and the reaction was stirred for 0.5 h, now dark brown. Volatiles were removed *in vacuo* to afford a black powder. The solid was washed with pentane (3×10 mL), and the orange-tinged black pentane extraction was collected. The pentane extraction was passed through a silica gel column (2.5 cm × 8 cm) and flushed with pentane to remove ferrocene (bright yellow) and unreacted phosphine; then a greenish-black elution of **8** was collected from the silica in Et<sub>2</sub>O. After filtration through Celite, the Et<sub>2</sub>O solution of **8** was concentrated and set at –20 °C overnight, affording grey-green, diffraction quality needles of **8**.

Yield: a range from 3 to 7 %

<sup>1</sup>H NMR (600 MHz, C<sub>6</sub>D<sub>6</sub> in ppm) (**Figure S23**): 7.49 (s), 7.04 (s), 7.02, 7.01 (d), 2.71 (s, CH<sub>2</sub>), 1.16 (s, CH<sub>3</sub>)

<sup>13</sup>C{<sup>1</sup>H} NMR (151 MHz, *d*<sup>6</sup>-benzene, ppm) (**Figure S24**): interstitial carbide peak at δ 489.33, CO resonances at δ 214.33, 213.20, δ 140.81, 140.73, 133.79, 133.66, 128.89, 128.72 (aryl-C), δ 43.88 (CH<sub>2</sub>), 39.63 (CH<sub>3</sub>)

<sup>31</sup>P{<sup>1</sup>H} NMR (243 MHz, *d*<sup>6</sup>-benzene, ppm) (**Figure S25**): Bound Fe–P region: 48.50, 44.87, 41.57, 25.12; Free PR<sub>3</sub> region: –24.71, –25.64 (max peak, reported shift for free Triphos: –26 ppm), –25.98, –27.11 δ

Selected IR peaks, solid, ν(CO) in cm<sup>–1</sup>(**Figure S26**): 2078 (m), 2011 (s), 1995 (s), 1966 (s), 1949 (s), 1932 (s).

**[Fe<sub>4</sub>(μ<sub>4</sub>-C)(κ<sub>3</sub>-Triphos)(CO)<sub>10</sub>] (9) from MeCN reaction of 2 with Triphos**

In a glovebox under N<sub>2</sub> atmosphere, a 50 mL flask was charged with a violet solution of (Et<sub>4</sub>N)<sub>2</sub>[Fe<sub>6</sub>(μ<sub>6</sub>-C)(CO)<sub>16</sub>] (**1**: 270 mg, 0.256 mmol) in approximately 20 mL of MeCN. Next, two equiv of solid [Fc]PF<sub>6</sub> (186 mg, 0.563 mmol) were added, and the reaction mixture was stirred vigorously at room temperature for ~10 min, affording a reddish-black solution. Two equiv of Triphos (335 mg, 0.536 mmol) were then added, and the reaction was stirred for 30 min, turning reddish-brown. The solvent was removed *in vacuo*, and the residual MeCN was thoroughly removed by triturating the residue with Et<sub>2</sub>O until a dry, black powder remained. The solid was extracted with pentane (4×20 mL) to afford a dark yellow solution containing ferrocene, unreacted Triphos and trace amounts of the desired product. The remaining black powder was extracted with Et<sub>2</sub>O (5×10 mL), generating a reddish-black solution that was concentrated to ~5 mL and loaded onto a silica gel column (2.5 cm × 8 cm). Further elution with Et<sub>2</sub>O provided a greenish-black fractions (a bright red material remained on the column). To guarantee reliable crystallization, the green-black fractions were re-concentrated to ~5 mL and re-purified over silica (more red impurities, including **10**, remained on the column). The final Et<sub>2</sub>O fractions were combined and filtered through Celite. Slow evaporation for 12 h at room temperature provided diffraction quality black prisms of **9**.

Yield: range 5 to 15%

<sup>1</sup>H NMR (600 MHz, C<sub>6</sub>D<sub>6</sub> in ppm) (**Figure S27**): 7.48 (s), 7.16 (s), 7.05 (s), 2.70 (s, CH<sub>2</sub>), 1.15 (s, CH<sub>3</sub>)

<sup>13</sup>C{<sup>1</sup>H} NMR (151 MHz, *d*<sup>6</sup>-benzene, ppm) (**Figure S28**): interstitial carbide peak at δ 485.34 ppm, CO resonances at δ 220.45, 216.23 (broad), 215.16; δ 140.81, 139.37, 133.79, 130.92, 128.38 (aryl-C), δ 43.82 (CH<sub>2</sub>), 39.53 (CH<sub>3</sub>)

<sup>31</sup>P{<sup>1</sup>H} NMR (243 MHz, *d*<sup>6</sup>-benzene, ppm) (**Figure S29**): Bound Fe-P region: δ 41.58 (broad, weak 1P); Free PR<sub>3</sub> region: -25.67 (2P, Reported shift for free Triphos: -26 ppm)

Selected IR peaks, solid, ν(CO) in cm<sup>-1</sup>(**Figure S30**): 2059 (m), 2045 (m), 2002 (s), 1971 (s), 1944 (s), 1918 (s), 1884 (s), 1799 (m).

Anal. Calc.: C, 54.78; H, 3.45; N, 0.00

Anal. Exp.: C, 56.38; H, 4.12; N, 0.34

**9 from DCE reaction of Triphos with 2**

In a glovebox under N<sub>2</sub> atmosphere, a 20 mL screw-cap vial was charged with a violet solution of (Et<sub>4</sub>N)<sub>2</sub>[Fe<sub>6</sub>(μ<sub>6</sub>-C)(CO)<sub>16</sub>] (258 mg, 0.244 mmol) in 10 mL of DCE. Solid [Fc]PF<sub>6</sub> (183 mg, 0.553 mmol) was added, and the reaction mixture was stirred vigorously at room temperature for 15 min, affording a dark brown solution. Triphos (300 mg, 0.480 mmol) was added, and the reaction was stirred for 0.5 h, now dark brown. Volatiles were removed *in vacuo* to black powders. The solid was washed with pentane (3×10 mL), and the orange-tinged black pentane extraction was collected. Unexpectedly, no detectable compound **9** was found in the pentane extraction, unlike the MeCN reaction (*vide supra*). The crude reaction solid was then extracted with Et<sub>2</sub>O (5×10 mL), affording a reddish-brown black extraction that was passed through a silica gel column (2.5 cm × 8 cm) to collect more

of **9** as a greenish black elution, and leaving bright red color on the column. The Et<sub>2</sub>O solution of **9** was then filtered through Celite, and characterized by FT-IR.

#### *Formation of 9 from reaction of MeCN with crystals of 8*

In an N<sub>2</sub>-atmosphere glovebox, dried crystalline solid of **8** (~5-7 mg) was dissolved in ~2.5 mL of Et<sub>2</sub>O in a 20 mL vial, affording a pale greenish-beige solution. A dropcast FT-IR spectrum of this solution was acquired. Next, ~1 mL of MeCN was added to the reaction mixture while stirring vigorously at room temperature, immediately turning the solution a pale red. After ~3 min, the reaction mixture was distinctly red-brown, at which point another dropcast FT-IR spectrum was acquired, indicating complete disappearance of the characteristic ~2075 cm<sup>-1</sup>  $\nu(\text{CO})$  feature of **8** and an overall red-shift of all  $\nu(\text{CO})$  features (**Figure S28**). Volatiles were removed *in vacuo* and the crude solids were purified by pentane washes (removing trace **8** and free Triphos, evidenced by FT-IR) and then extraction into Et<sub>2</sub>O (**9**, **10** and other red impurities). The pale greenish brown Et<sub>2</sub>O extraction was purified over silica, and the greenish (first) fraction was filtered through Celite. Slow evaporation of Et<sub>2</sub>O afforded small black prisms of **9** suitable to establish the connectivity by X-ray diffraction.

#### **[(CO)<sub>9</sub>Fe<sub>3</sub>( $\mu_3$ -CCO<sub>2</sub>- $\kappa_2$ )Fe(CO)( $\kappa_3$ -Triphos)] (**10**)**

During the workup described in the synthesis of **8** and **7**, cluster **10** is the second band encountered during silica chromatography of the Et<sub>2</sub>O extraction after removal of **9**. A bright red band is eluted from the column with THF, affording a ruby red solution. Volatiles were removed *in vacuo* and the red solid was extracted into toluene and filtered over Celite. The toluene solution was layered with pentane by vapor diffusion at room temperature, affording large red prisms of **10** suitable for X-ray diffraction.

<sup>1</sup>H NMR (500 MHz, CDCl<sub>3</sub>, ppm) (**Figure S31**):  $\delta$  7.67 (s), 7.45 (s), 7.34 (s), 7.18, 7.13 (d), 7.05, 6.98 (d), 6.78 (s), (aryl-C from free and bound triphos) 3.78 (s, CH<sub>2</sub>), 1.87 (s, CH<sub>3</sub>)

<sup>13</sup>C{<sup>1</sup>H} NMR (151 MHz, CDCl<sub>3</sub>, ppm) (**Figure S32**):  $\delta$  221.53, 219.89, 216.30, 212.13, (CO); 163.76, 162.13 ( $\mu_3$ -CCO<sub>2</sub>;  $\mu_3$ -CO); 133.14, 132.36, 131.68, 131.54, 130.65, 130.28, 129.84, 129.79, 129.64, 129.54, 128.96, 128.83, 128.51, (aryl-C); 39.84 (CH<sub>2</sub>), 38.92 (CH<sub>3</sub>)

<sup>31</sup>P{<sup>1</sup>H} NMR (162 MHz, CDCl<sub>3</sub>, ppm) (**Figure S33**):  $\delta$  46.47, 46.23 (d), 35.26, 35.02, 34.78 (t)

Selected IR peaks, dropcast solid from THF solution,  $\nu(\text{CO})$  in cm<sup>-1</sup> (**Figure S34**): 2059 (w), 2000 (s), 1973 (s).

Anal. Calc. without MeCN: C, 53.51; H, 3.24; N, 0.00

% occupancy MeCN from XRD: 42.2

Anal. Exp.: C, 54.29; H, 4.46; N, 0.26

#### **[Fe<sub>3</sub>( $\mu_3$ -CPh){Triphos(PPh)<sub>2</sub>(PPh)}( $\mu_2$ -CO)<sub>2</sub>(CO)<sub>5</sub>] (**11**)**

In an N<sub>2</sub>-atmosphere glovebox, silica-purified **9** was dissolved in toluene affording a dark brown solution. Attempts to crystallize **9** at -20 °C over several months by slow evaporation instead afforded dichromic

(yellow/brown), diffraction quality prisms of **11** in a brown supernatant, as well as some white solids — likely Triphos and FeTriphos(CO)<sub>2</sub>.

Selected IR peaks, solid,  $\nu(\text{CO})$  in  $\text{cm}^{-1}$  (**Figure S35**): 2048 (s), 2000 (s), 1963 (s), 1936 (m), 1918 (s), 1854 (s).

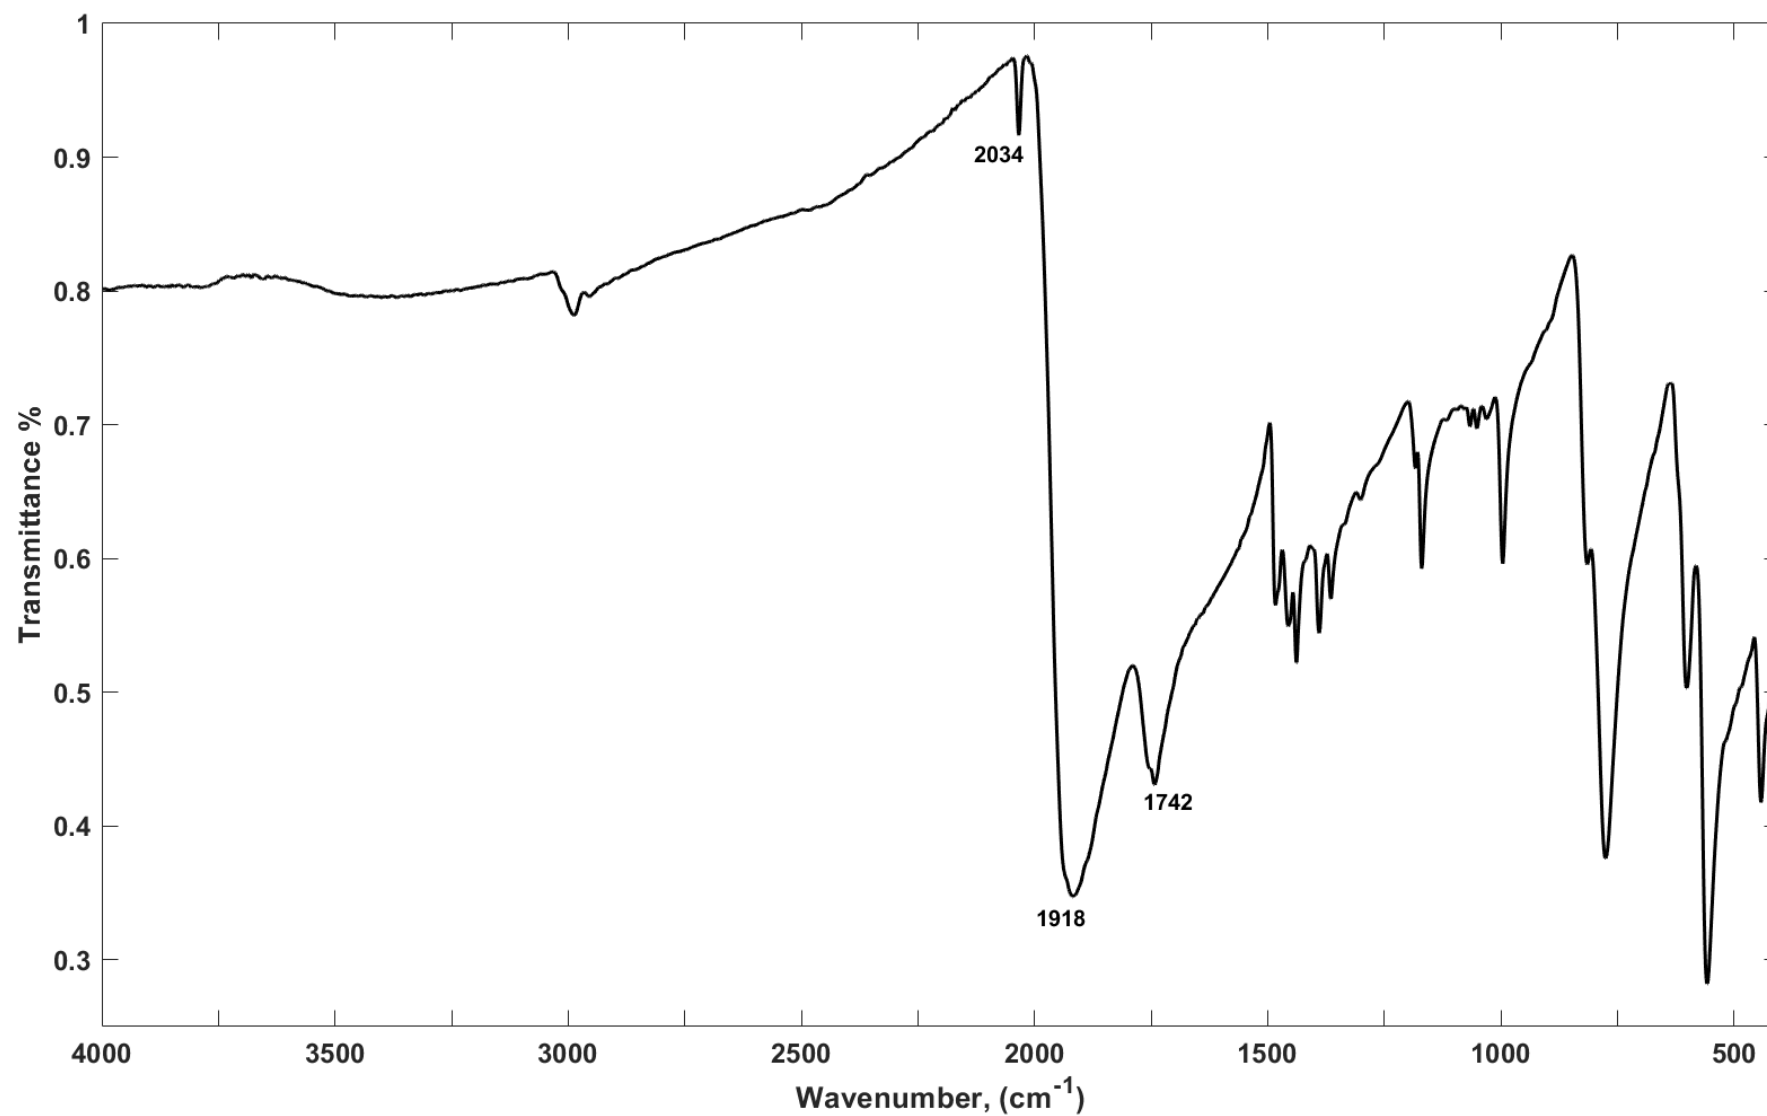

**Figure S1.** IR spectrum of [NEt<sub>4</sub>]<sub>2</sub>[Fe<sub>6</sub>(μ<sub>6</sub>-C)(CO)<sub>16</sub>] (**1**) in the solid state.

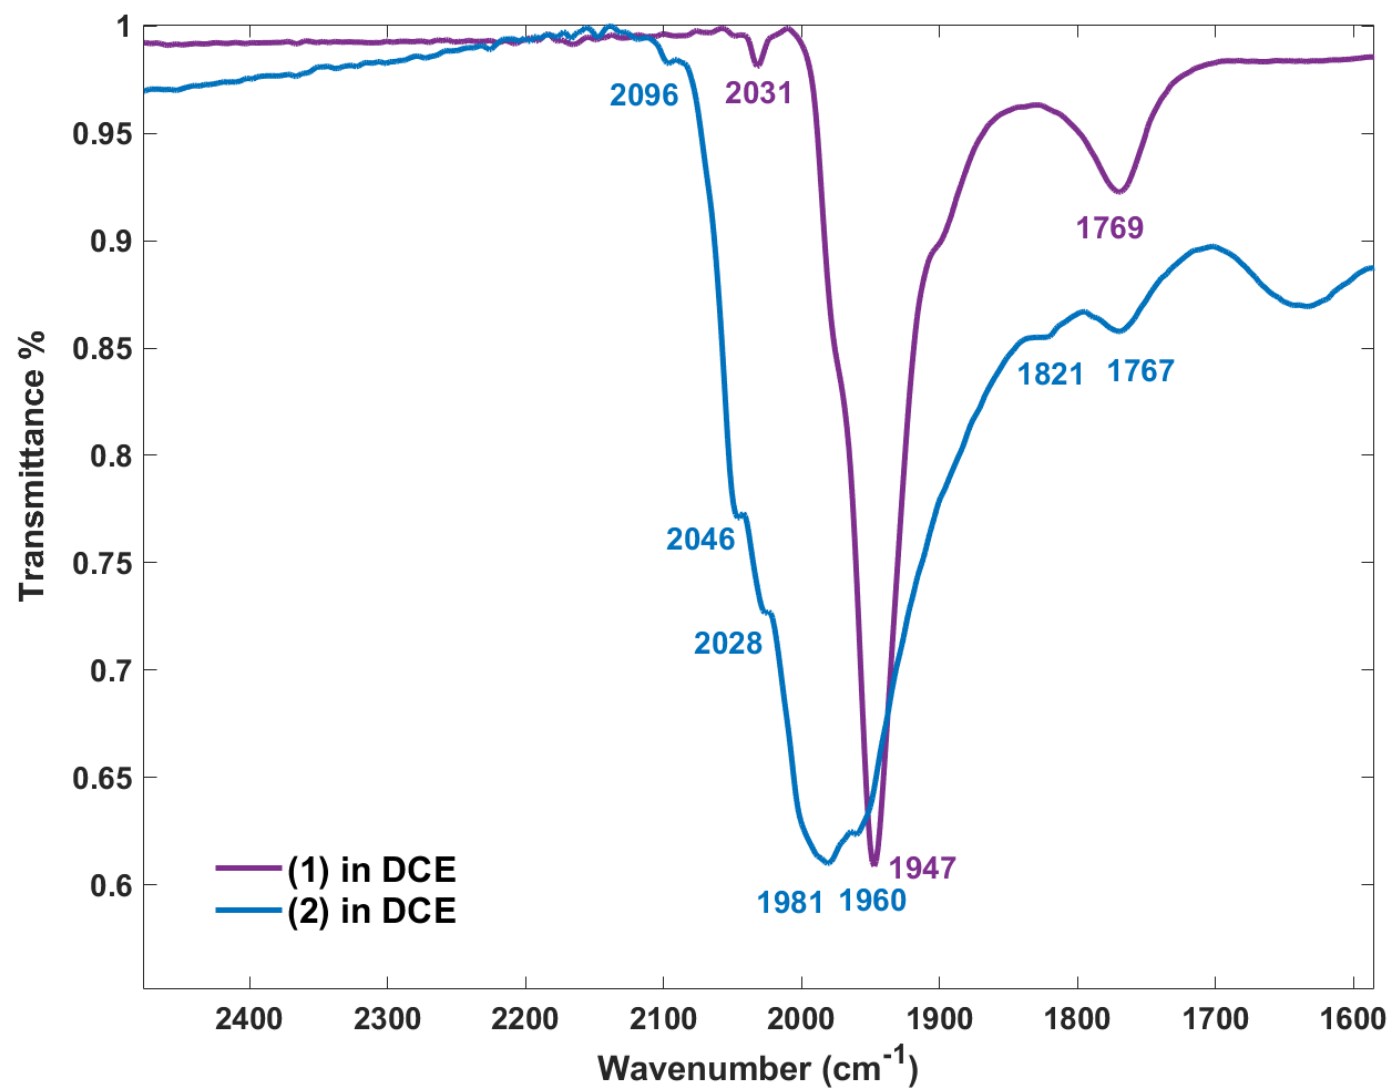

**Figure S2.** IR spectrum showing the  $\nu(\text{CO})$  region for **1** (purple trace) and the *in situ* oxidized compound  $[\text{Fe}_6(\mu_6\text{-C})(\text{CO})_{16}]$  (**2**) formed by the reaction of **1** and 2 equiv  $[\text{Fc}]\text{PF}_6$  (blue trace); all as dropcast samples from DCE.

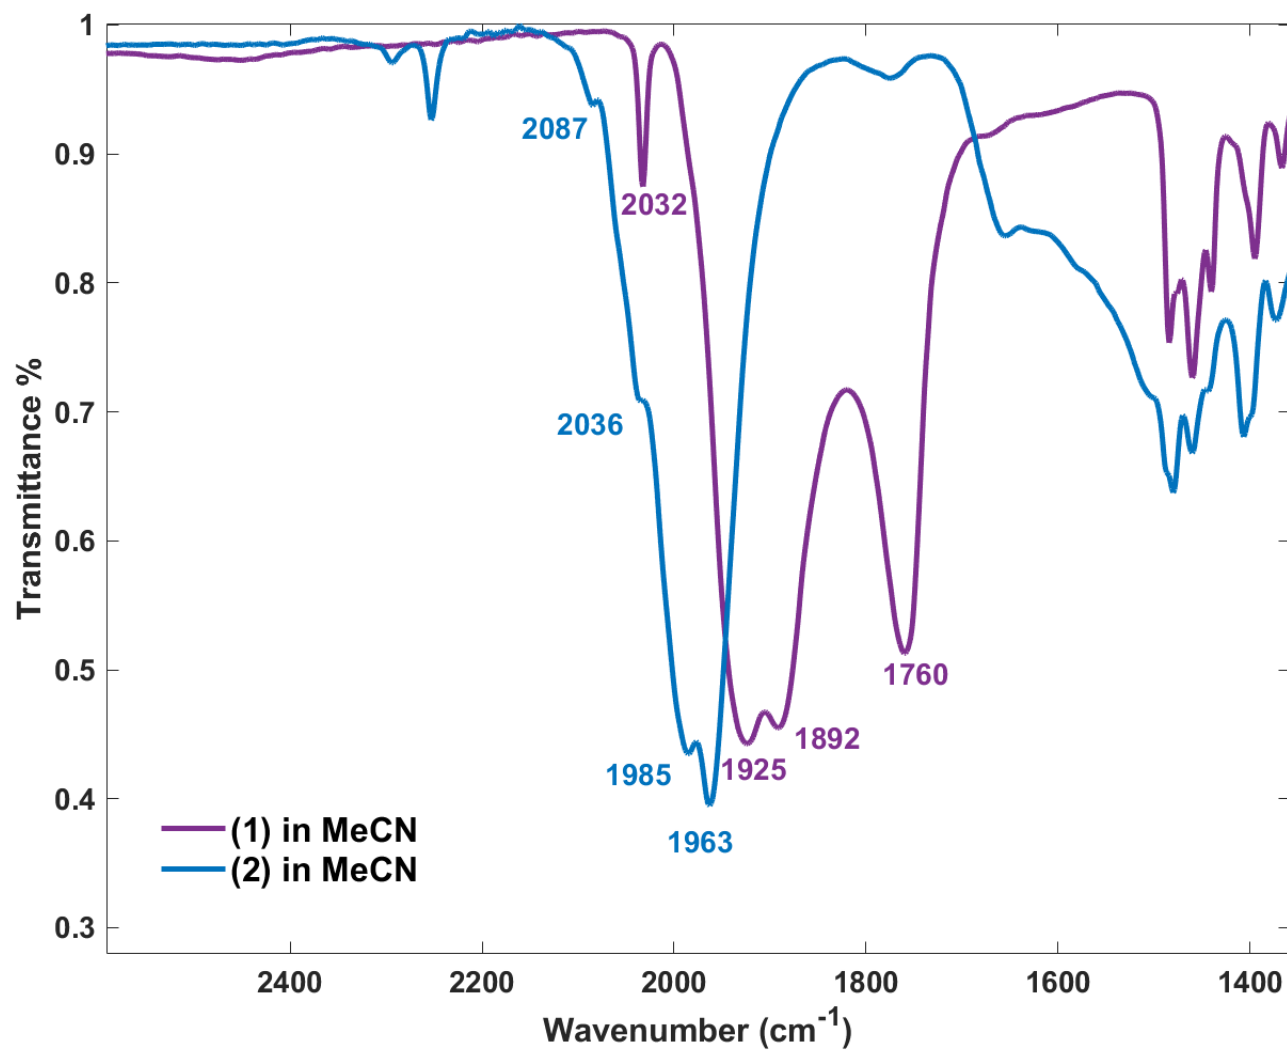

**Figure S3.** IR spectrum showing the  $\nu(\text{CO})$  region for **1** (purple trace) and **2** formed by the reaction of **1** and 2 equiv of  $[\text{Fc}]\text{PF}_6$  (blue trace); all as dropcast samples from MeCN.

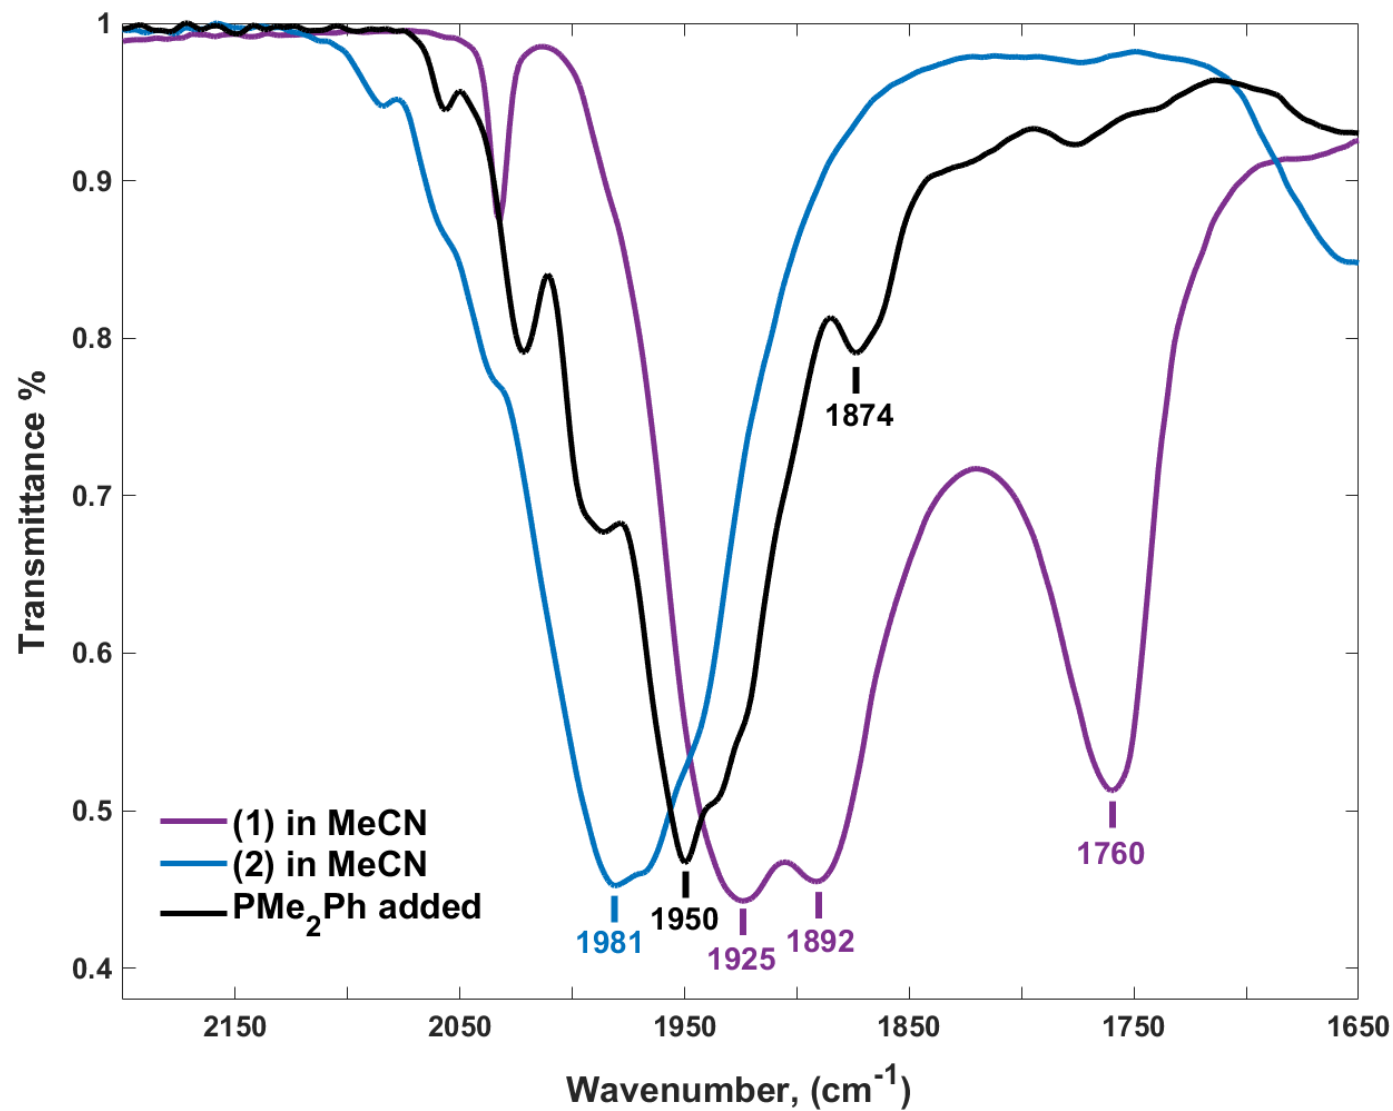

**Figure S4.** IR spectrum of **1** dropcast from MeCN (*purple trace*),  $\nu(\text{CO})$  features: 2032(w), 1925(s), 1892(s), 1760(s) cm<sup>-1</sup>; the reaction mixture of the oxidation of **1** with 2 equiv of [Fc]PF<sub>6</sub> to form **2** in MeCN (*blue trace*),  $\nu(\text{CO})$  features: 2086(w), 2056(w sh), 2035(w sh), 1981(s) cm<sup>-1</sup>; and the reaction of **2** with PMe<sub>2</sub>Ph in MeCN (*black trace*),  $\nu(\text{CO})$  features: 2055(w), 2022(m), 1988(m), 1950(s), 1874(m) cm<sup>-1</sup>.

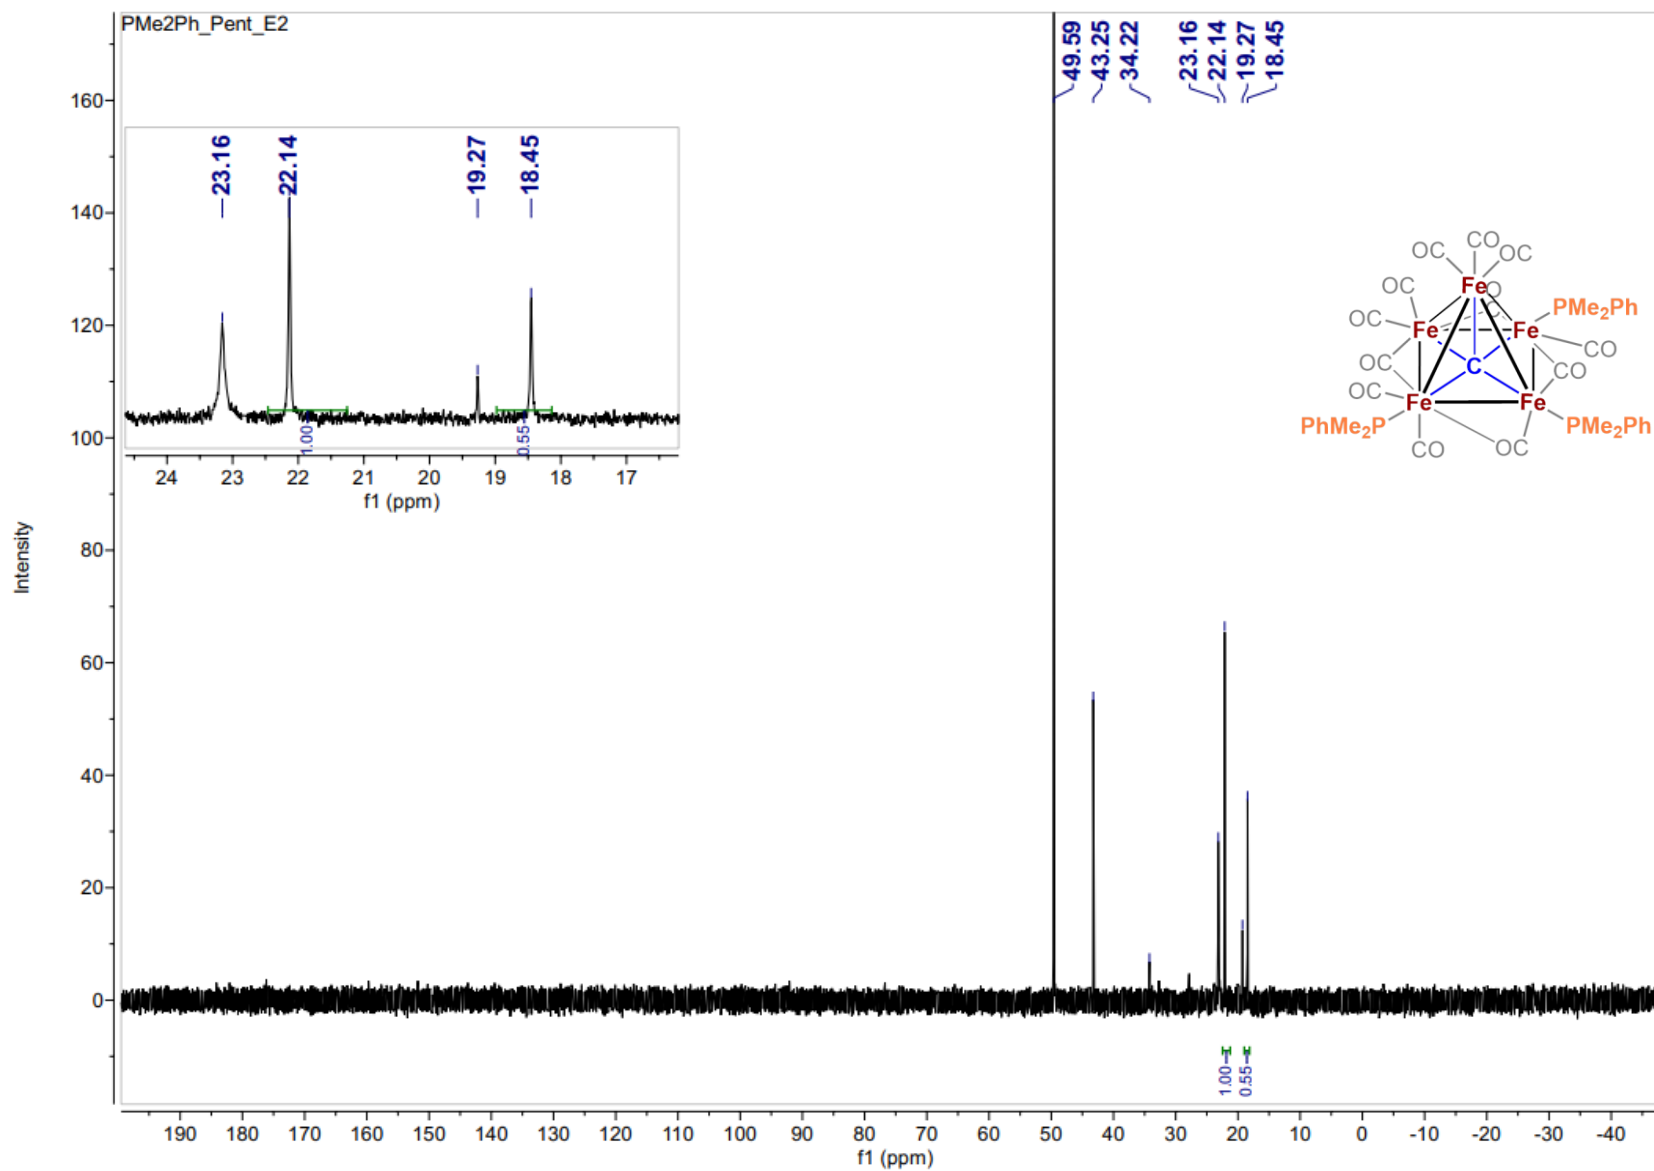

**Figure S5.**  $^{31}\text{P}$  NMR spectrum of the pentane extraction of the reaction of **2** with dmpp (acquired in pentane) with resonances for the bound phosphines in  $[\text{Fe}_5(\mu_5\text{-C})(\text{CO})_{12}(\text{PMe}_2\text{Ph})_3]$  at 22.14 and 18.45 ppm in relative intensities 2:1, for the ‘down’ and ‘up’ phosphine orientations.<sup>3</sup>

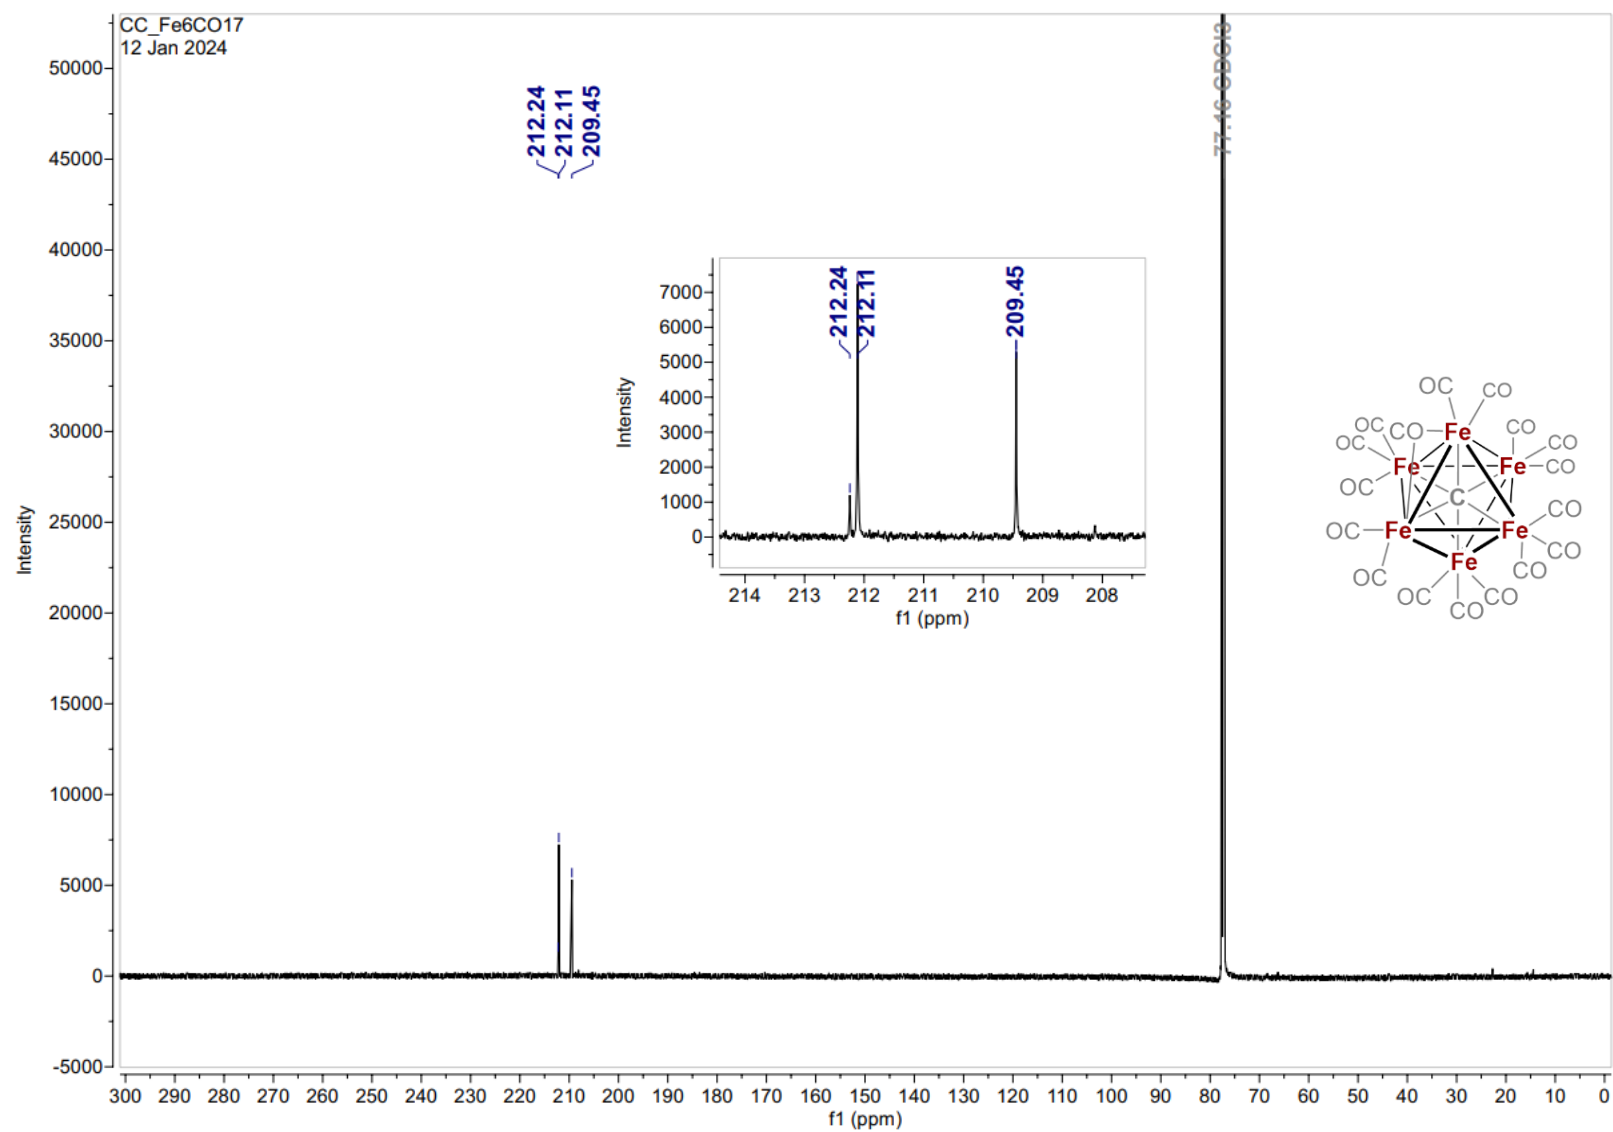

**Figure S6.**  $^{13}\text{C}$  NMR spectrum of  $[\text{Fe}_6(\mu_6\text{-C})(\mu_2\text{-CO})(\text{CO})_{16}]$  (3) in  $\text{CDCl}_3$  at  $25^\circ\text{C}$ .

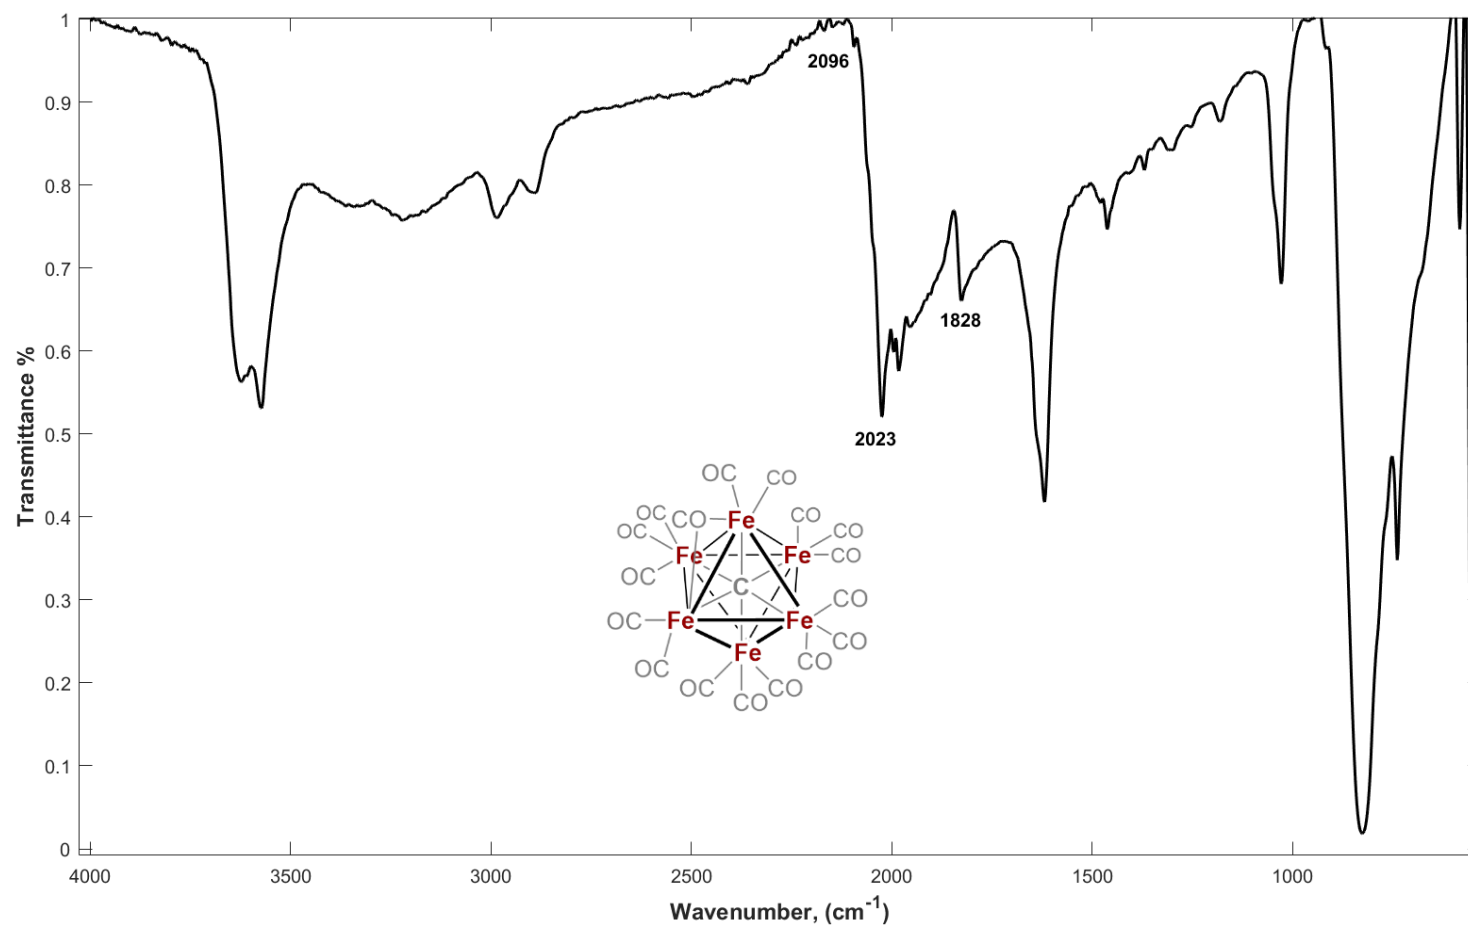

**Figure S7.** IR spectrum of [Fe<sub>6</sub>(μ<sub>6</sub>-C)(μ<sub>2</sub>-CO)(CO)<sub>16</sub>] (**3**) in the solid state. Some contamination from paraffin oil (from crystal handling) is present but does not obscure the ν(CO) region.

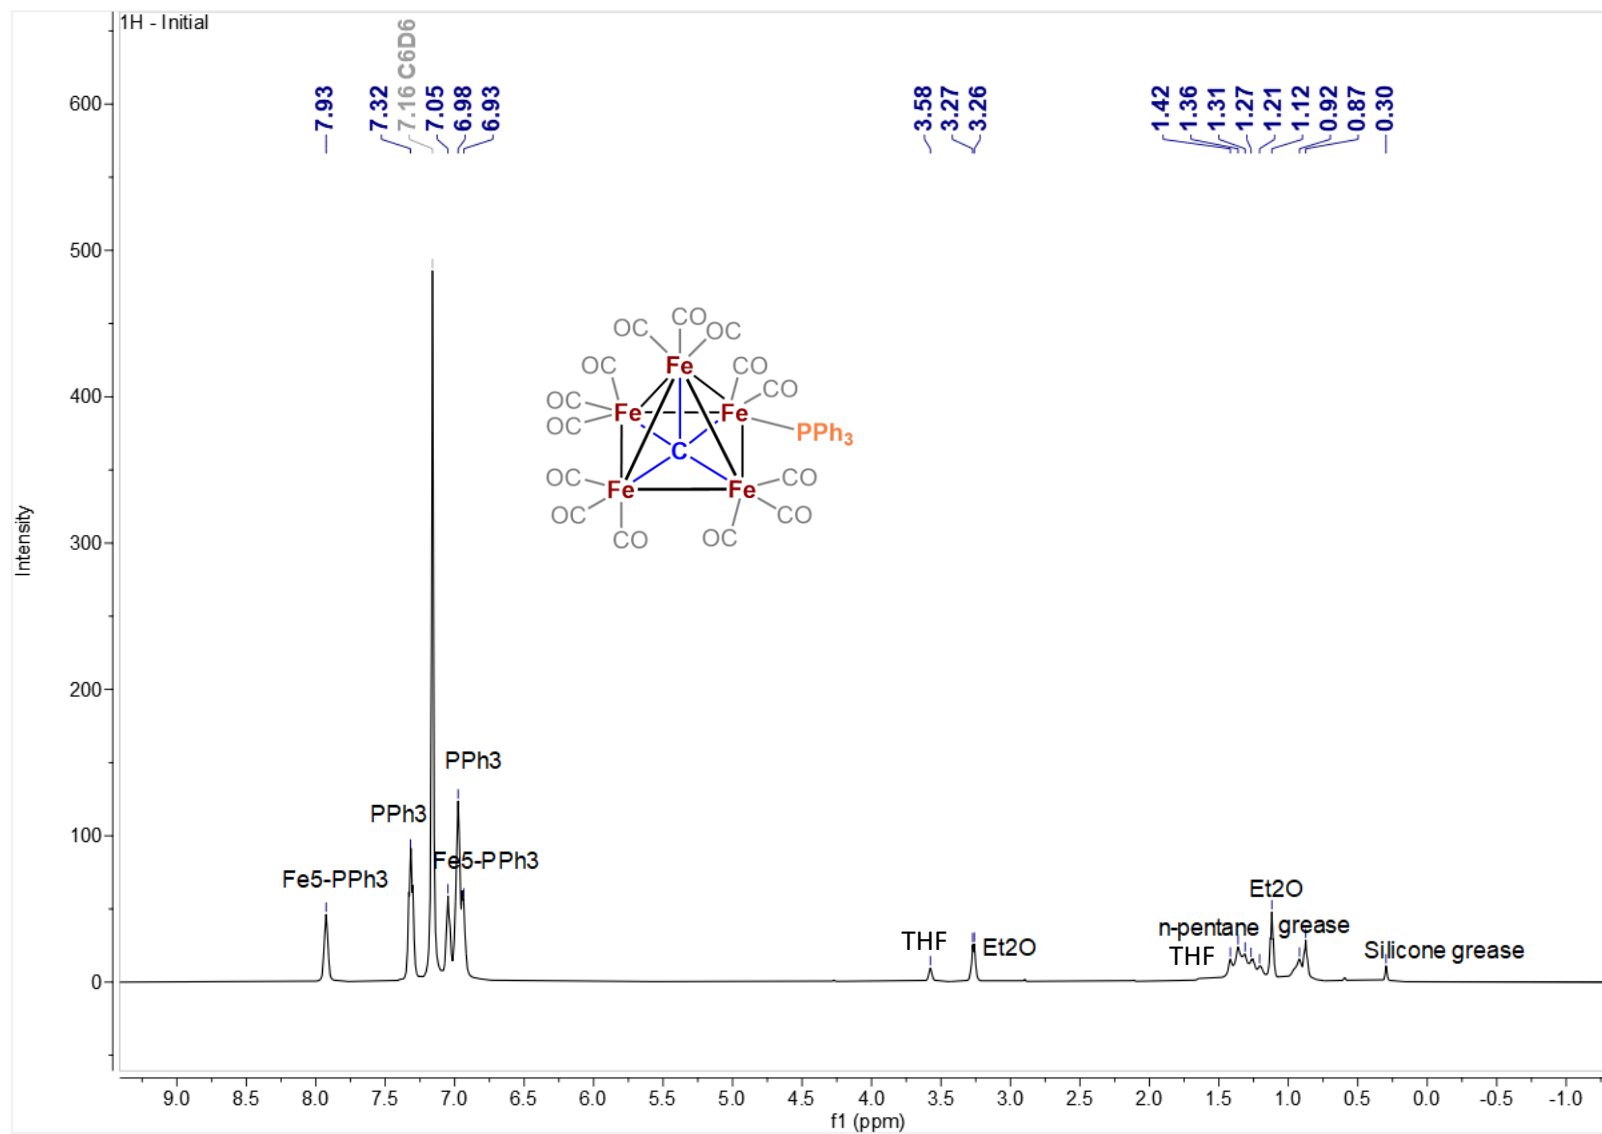

**Figure S8.**  $^1\text{H}$  NMR spectrum of  $[\text{Fe}_5(\mu_5\text{-C})(\text{CO})_{14}\text{PPh}_3]$  (**4**) in  $\text{C}_6\text{D}_6$  at 25 °C.

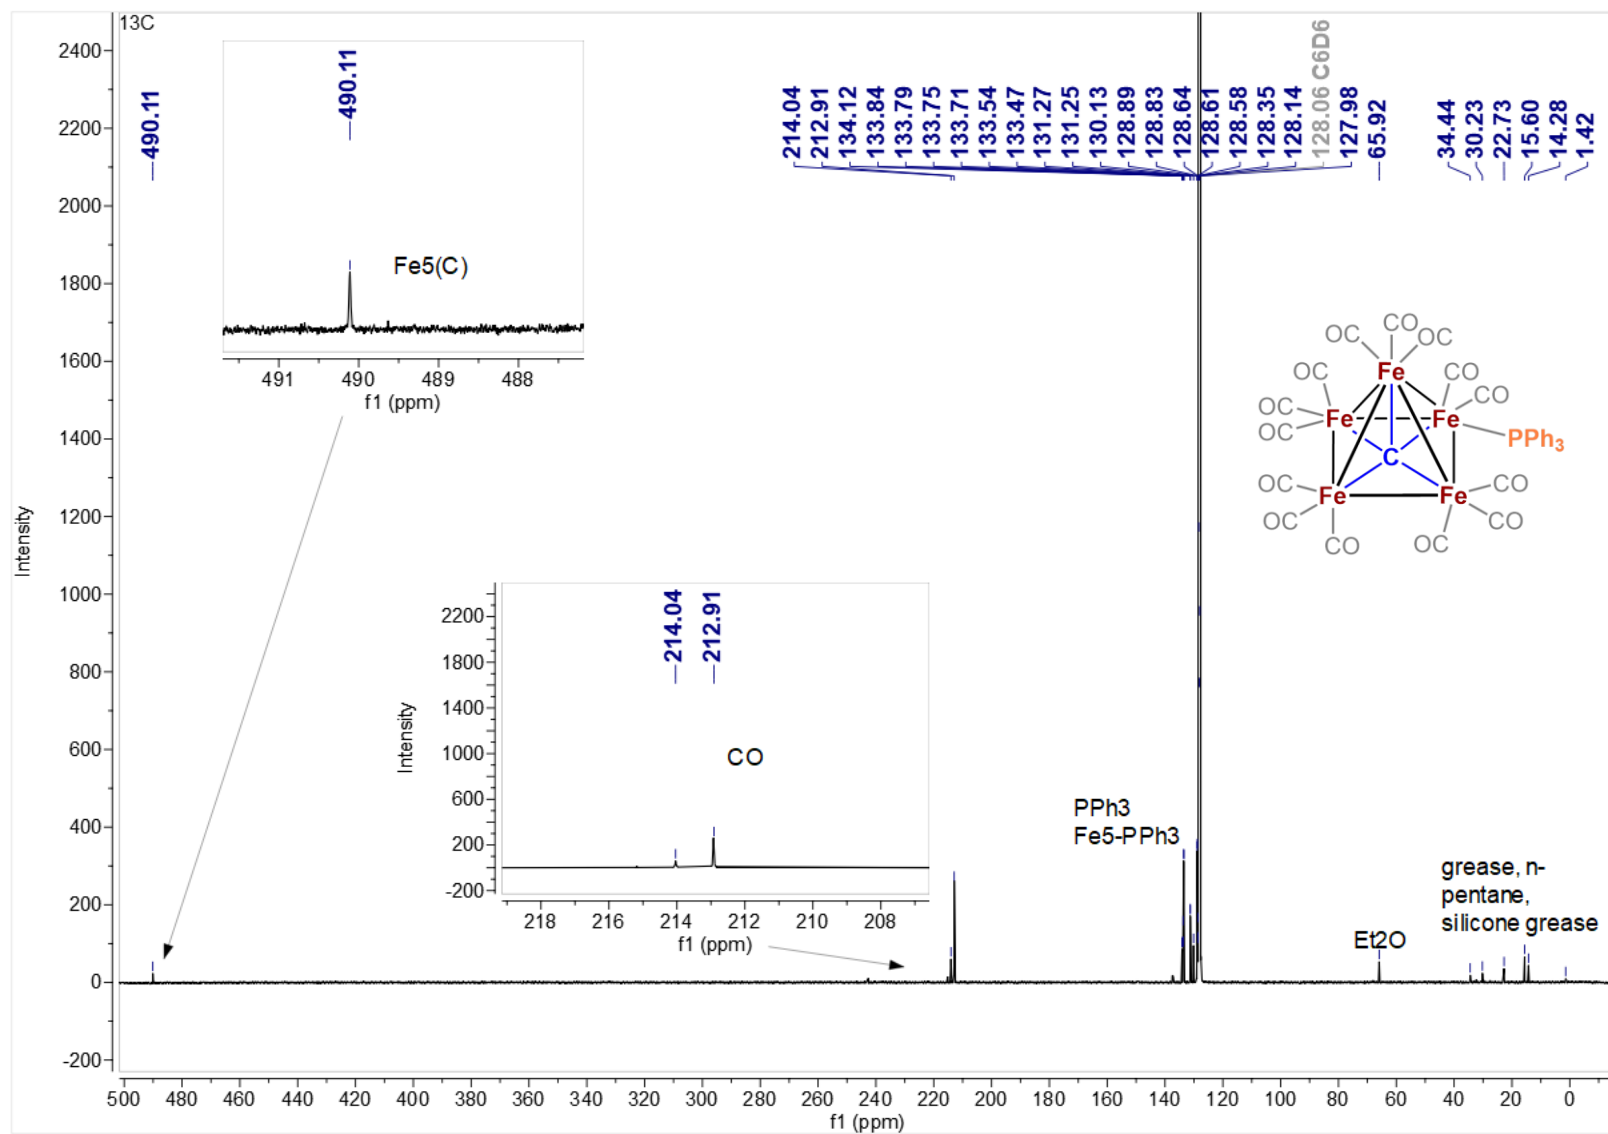

**Figure S9.**  $^{13}\text{C}$  NMR spectrum of  $[\text{Fe}_5(\mu_5\text{-C})(\text{CO})_{14}\text{PPh}_3]$  (**4**) in  $\text{C}_6\text{D}_6$  at 25 °C, with carbide region and CO regions highlighted.

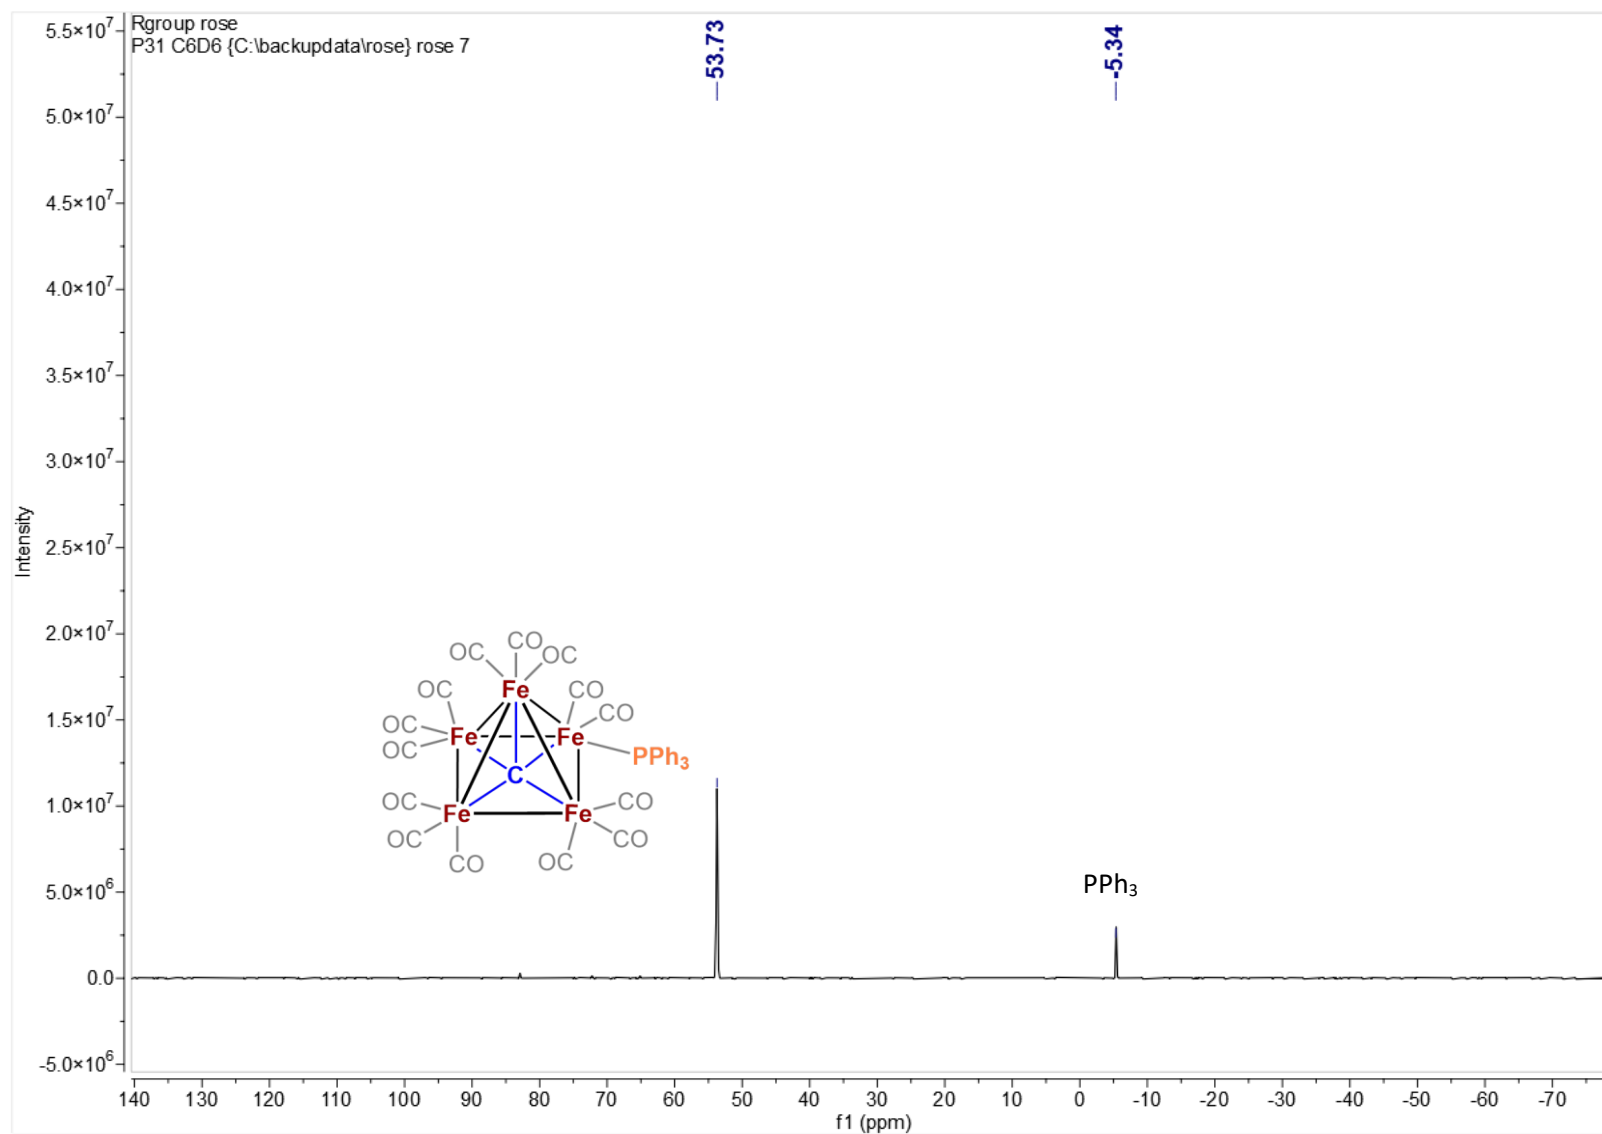

**Figure S10.** <sup>31</sup>P NMR spectrum of [Fe<sub>5</sub>(μ<sub>5</sub>-C)(CO)<sub>14</sub>PPh<sub>3</sub>] (**4**) in C<sub>6</sub>D<sub>6</sub> at 25 °C.

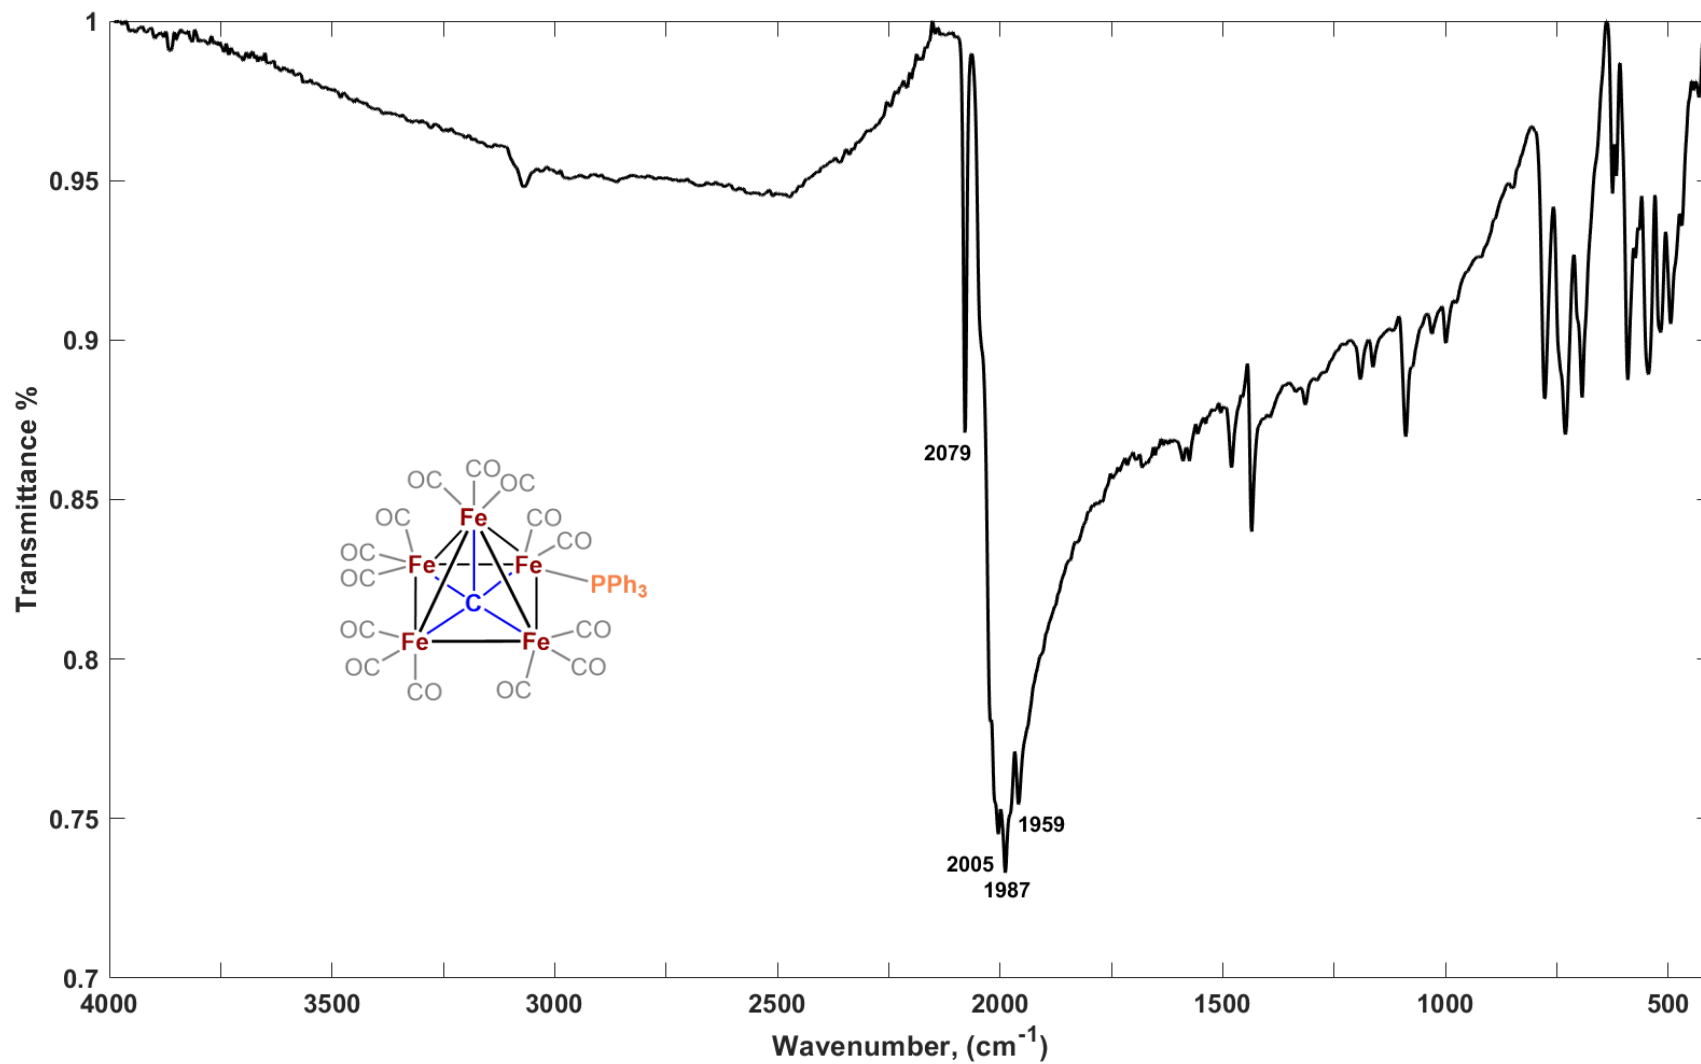

**Figure S11.** IR spectrum of [Fe<sub>5</sub>(μ<sub>5</sub>-C)(CO)<sub>14</sub>PPh<sub>3</sub>] (**4**) in the solid state.

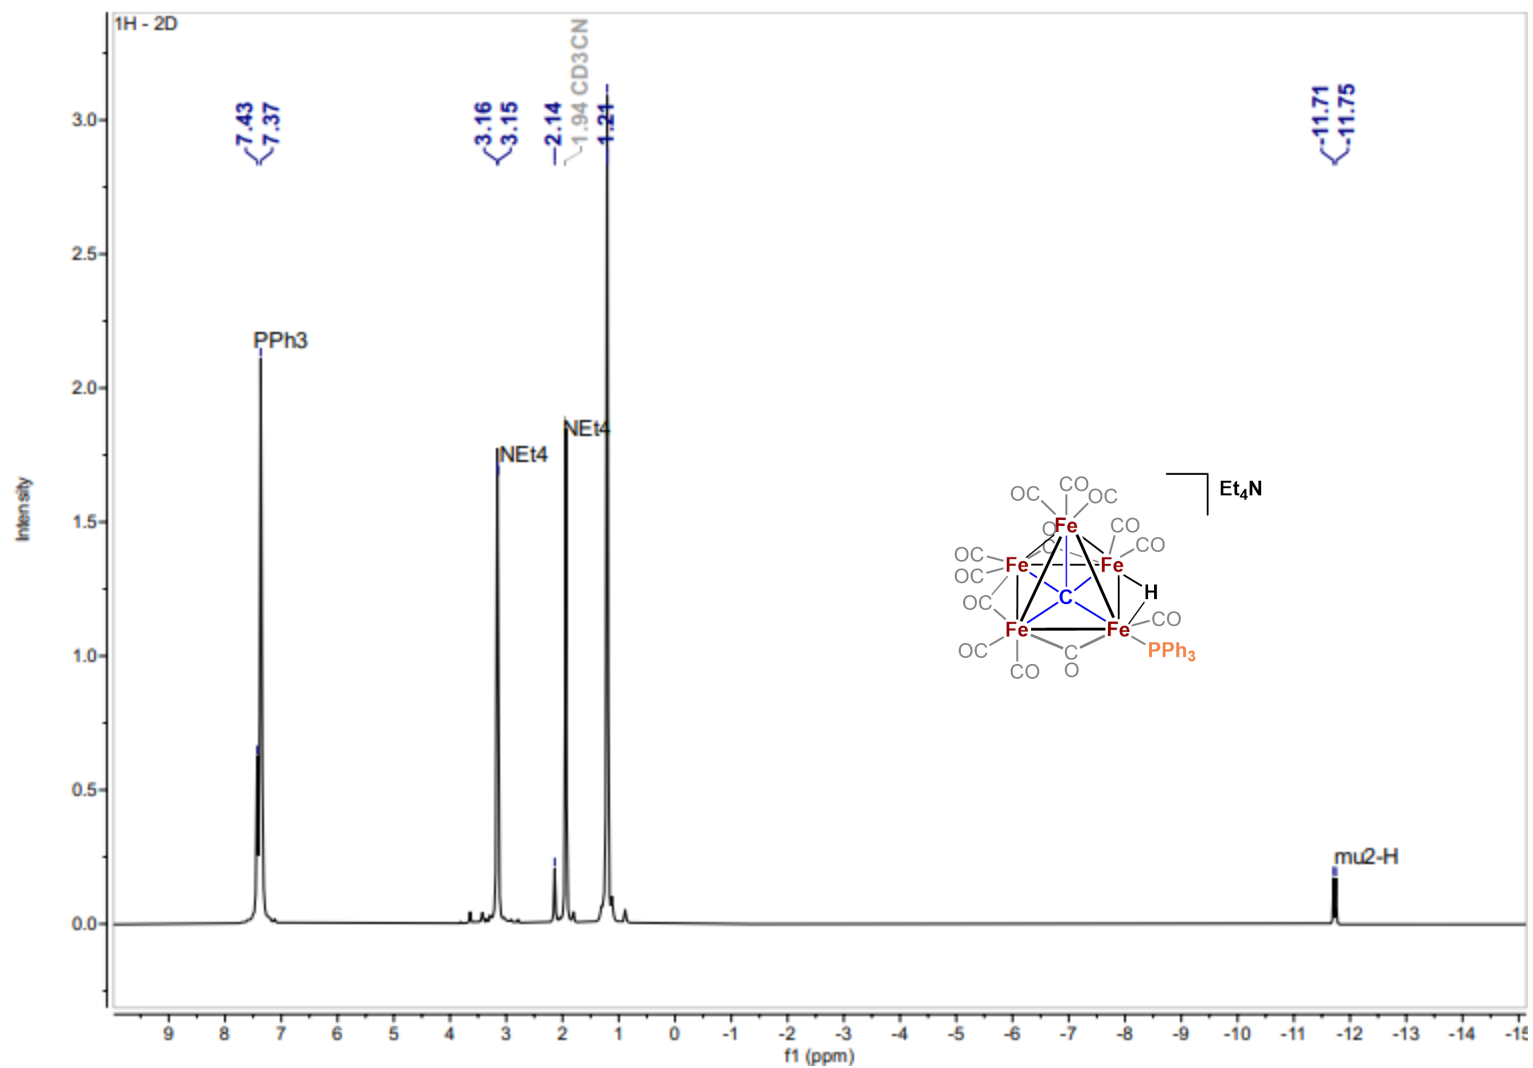

**Figure S12.**  $^1\text{H}$  NMR spectrum of  $\text{NEt}_4[\text{Fe}_5(\mu_5\text{-C})(\mu_2\text{-H})(\text{CO})_{13}\text{PPh}_3]$  (**5**) in  $d_3\text{-MeCN}$  at  $25^\circ\text{C}$ , with hydride region inset indicating doublet hydride peaks (due to coupling to  $^{31}\text{P}$  in  $\text{PPh}_3$ ,  $J = 24\text{ Hz}$ ).

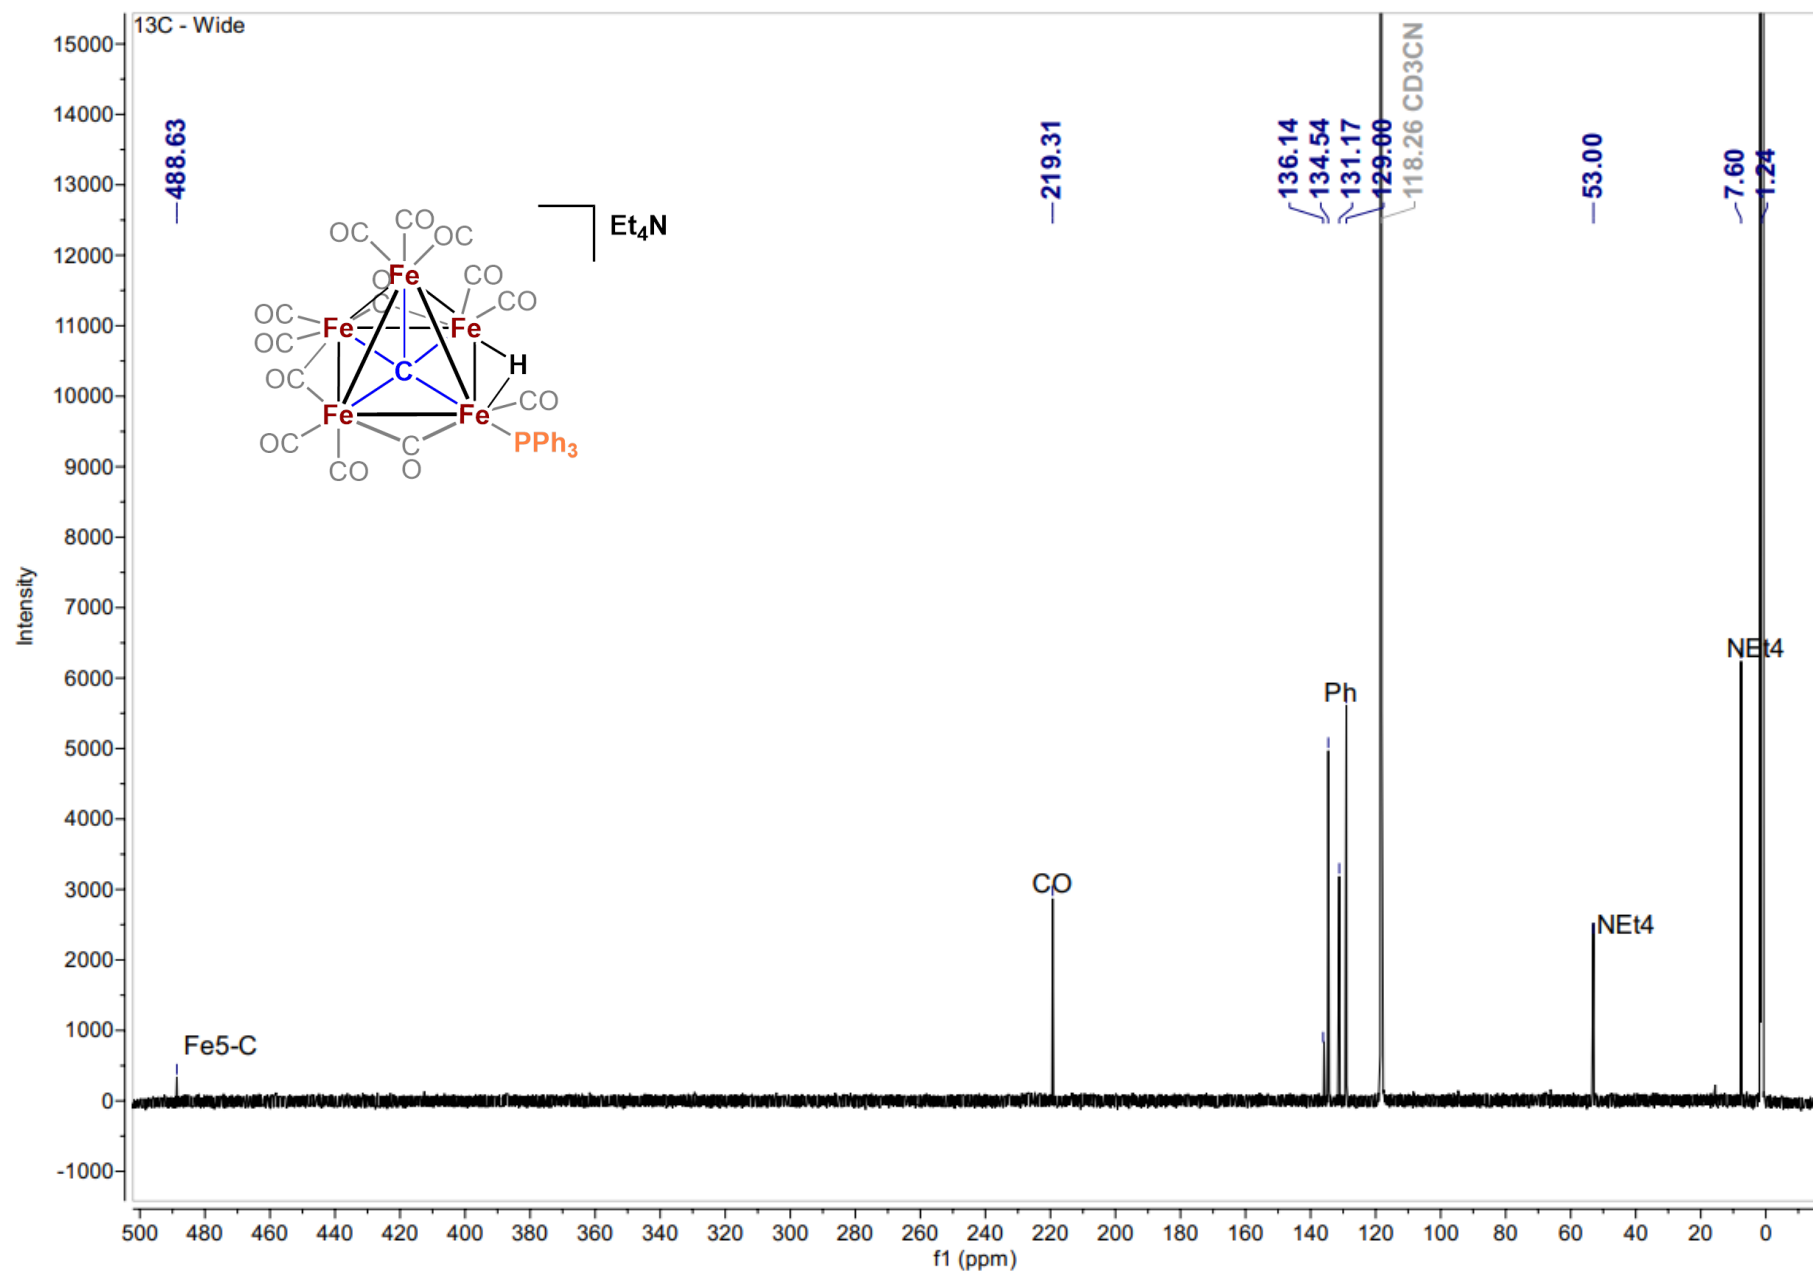

**Figure S13.**  $^{13}\text{C}$  NMR spectrum of  $\text{NEt}_4[\text{Fe}_5(\mu_5\text{-C})(\mu_2\text{-H})(\text{CO})_{13}\text{PPh}_3]$  (5) in  $d_3\text{-MeCN}$  at  $25^\circ\text{C}$ .

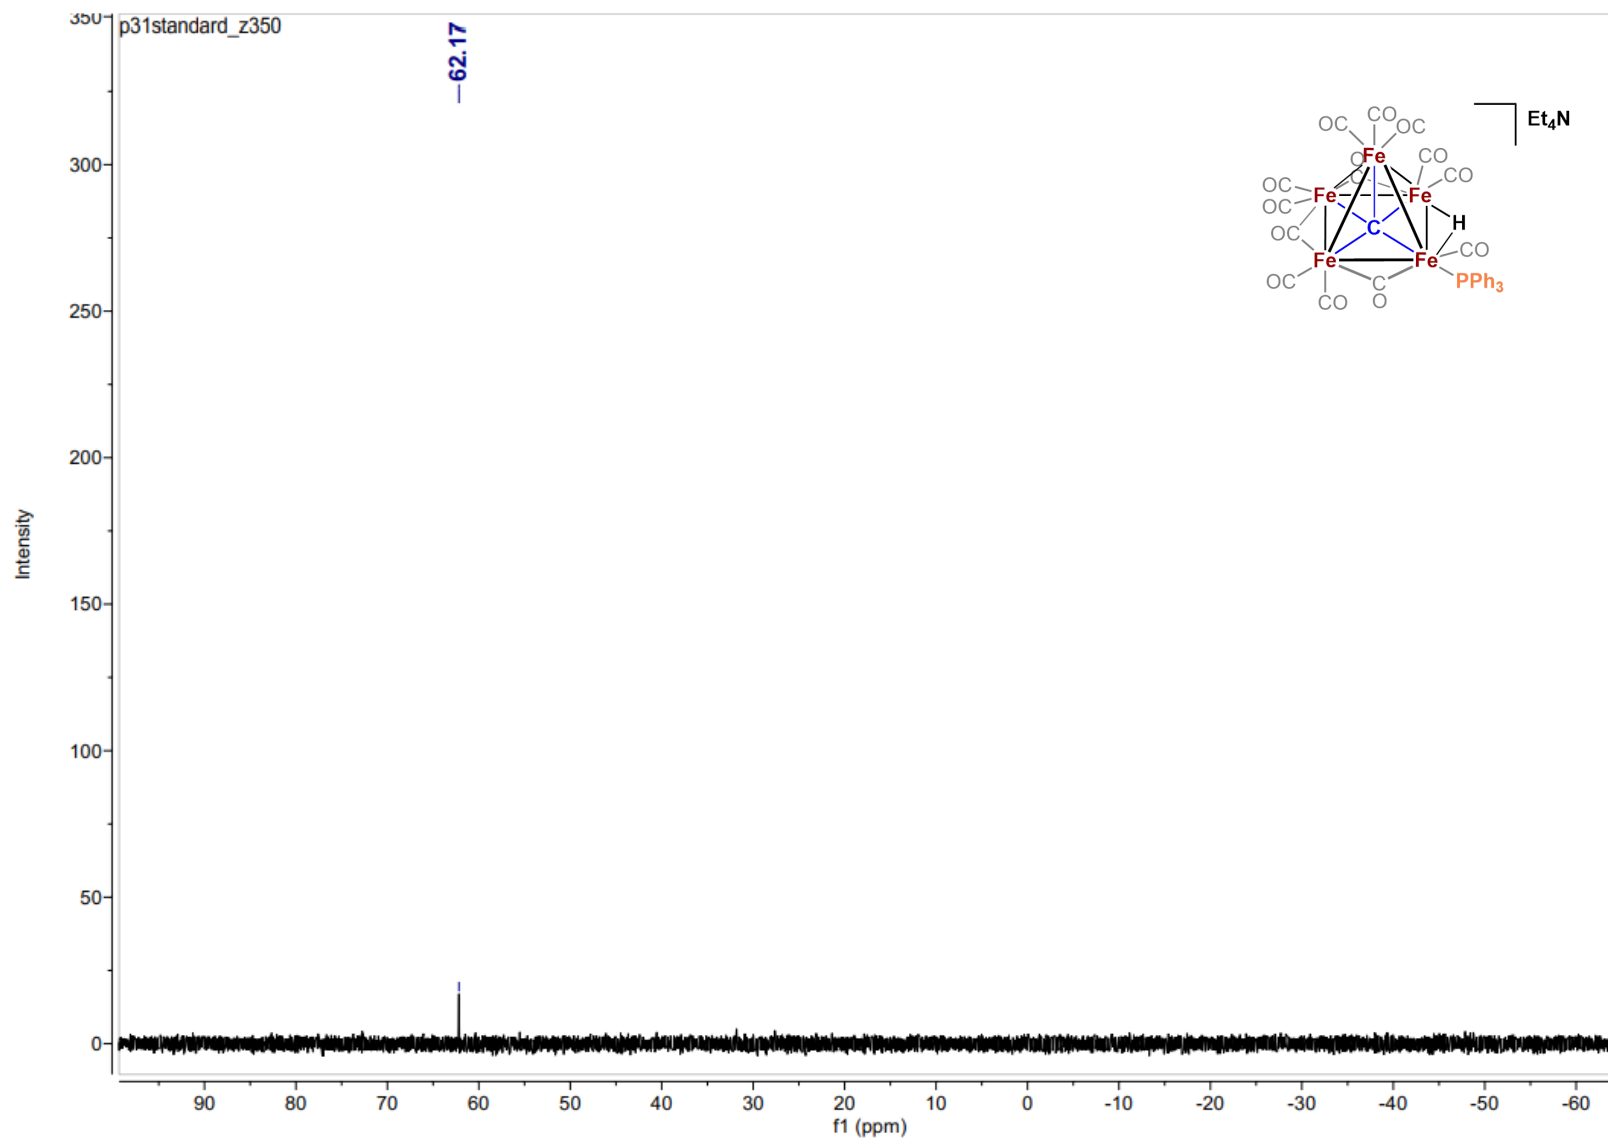

**Figure S14.**  $^{31}\text{P}\{^1\text{H}\}$  NMR spectrum of  $\text{NEt}_4[\text{Fe}_5(\mu_5\text{-C})(\mu_2\text{-H})(\text{CO})_{13}\text{PPh}_3]$  (**5**) in FPh at 25 °C.

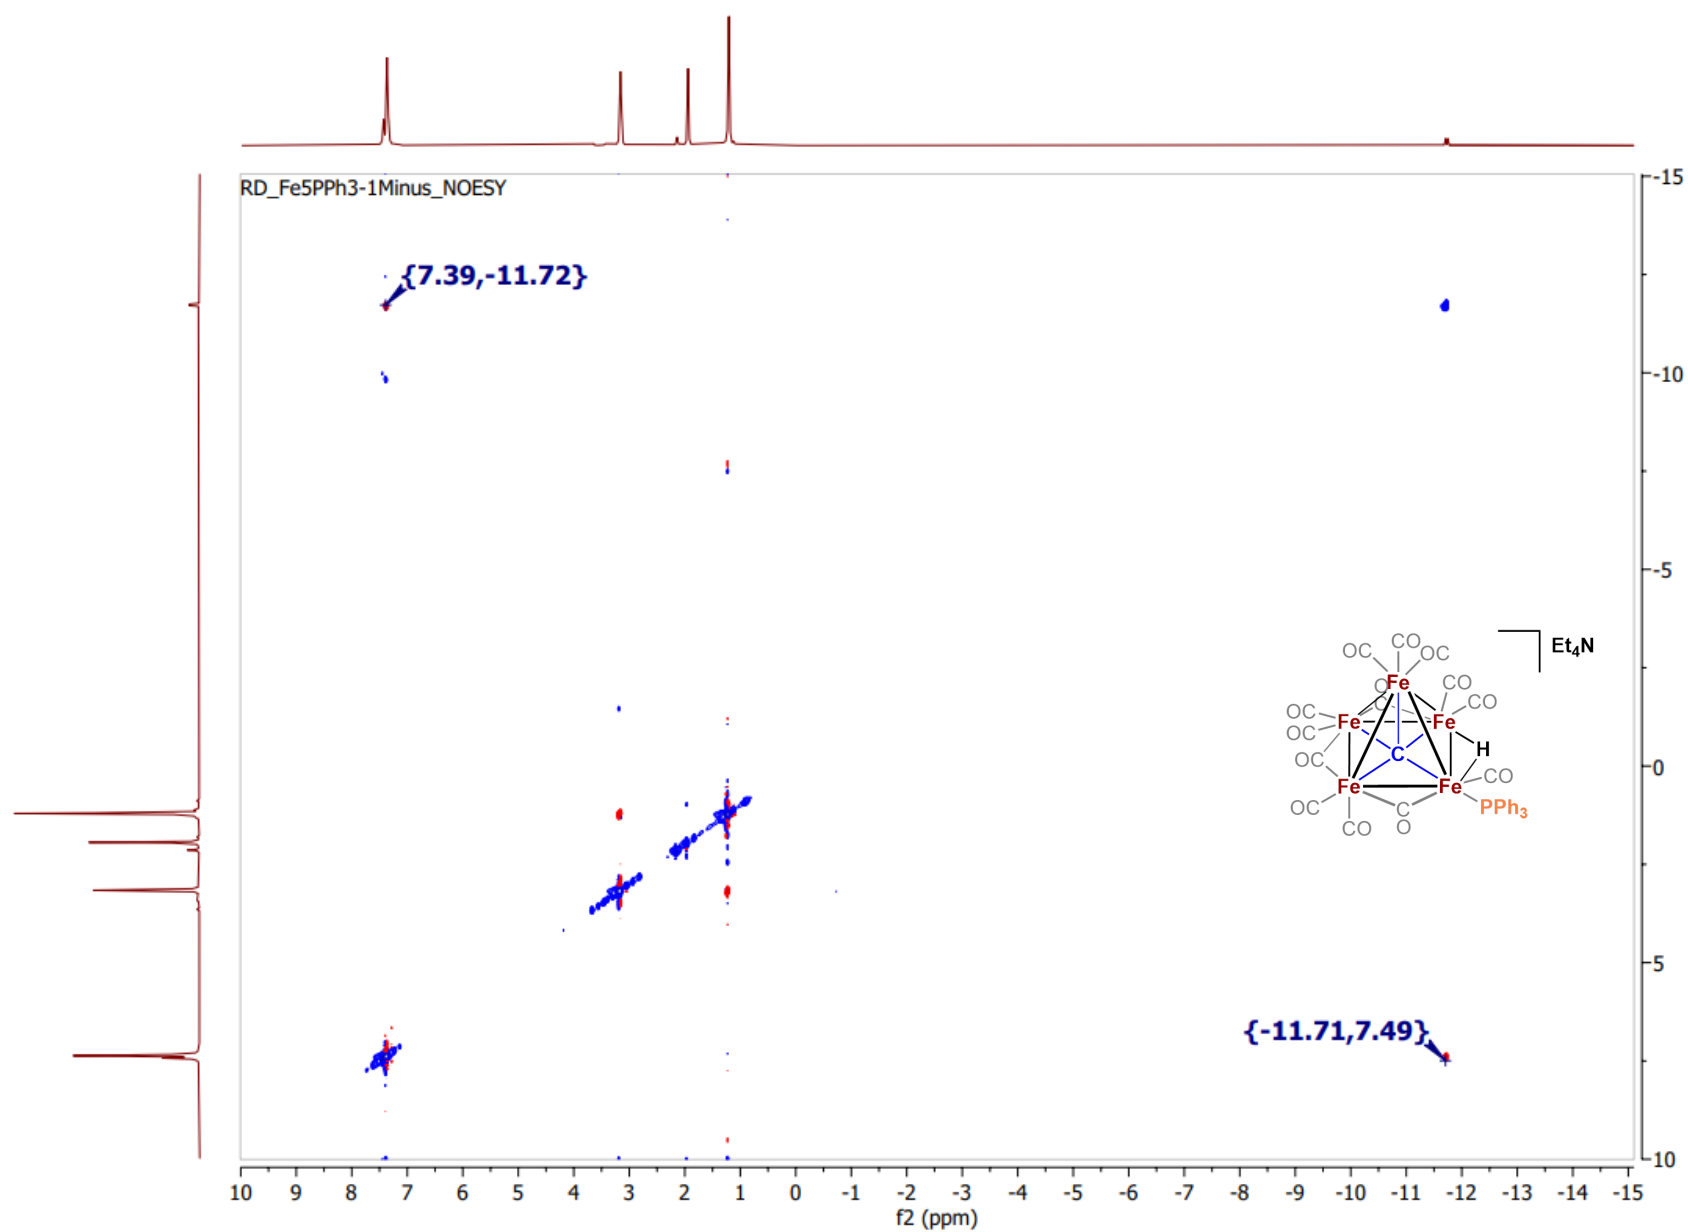

**Figure S15.** NOESY spectrum of  $\text{NEt}_4[\text{Fe}_5(\mu_5\text{-C})(\mu_2\text{-H})(\text{CO})_{13}\text{PPh}_3]$  (**5**) in  $d_3$ -MeCN at 25 °C.

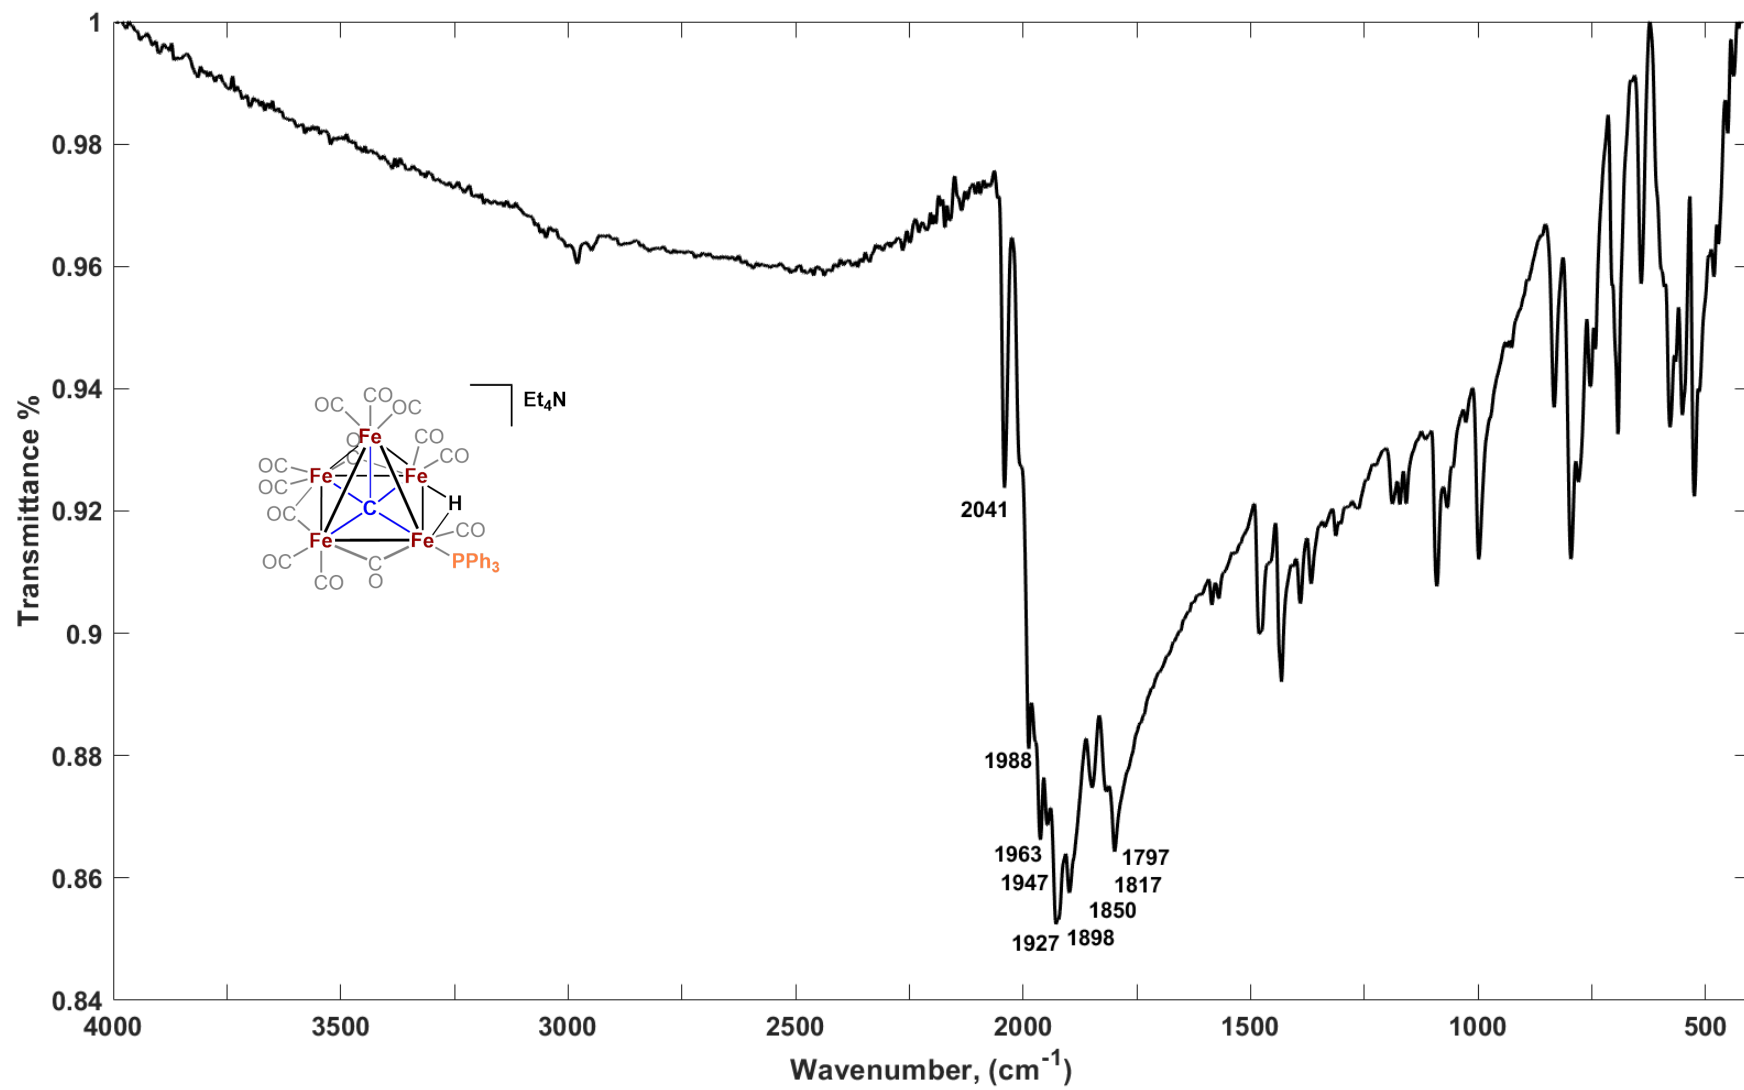

**Figure S16.** IR spectrum of  $\text{NEt}_4[\text{Fe}_5(\mu_5\text{-C})(\mu_2\text{-H})(\text{CO})_{13}\text{PPh}_3]$  (**5**) in the solid state.

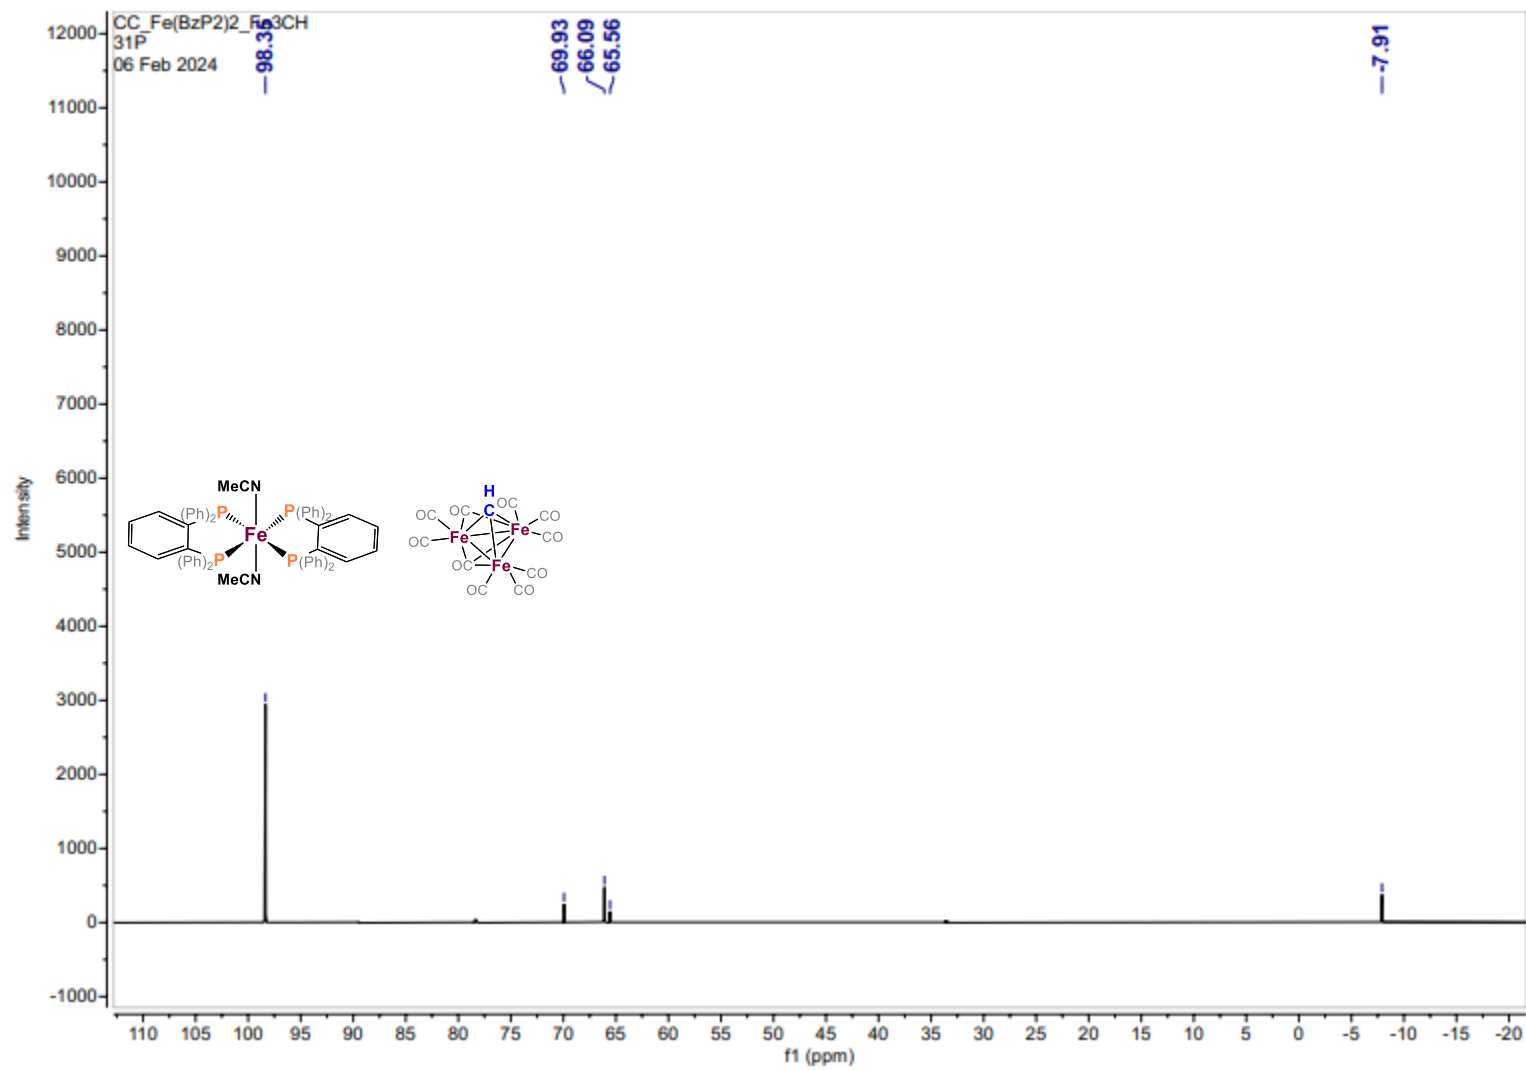

**Figure S17.**  $^{31}\text{P}$  NMR spectrum of  $[\text{Fe}_3(\mu_3\text{-CH})(\mu_3\text{-CO})(\text{CO})_9][(\text{bdpb})_2\text{Fe}(\text{MeCN})_2]$  (**6**) in  $d_3$ -MeCN at 25 °C.

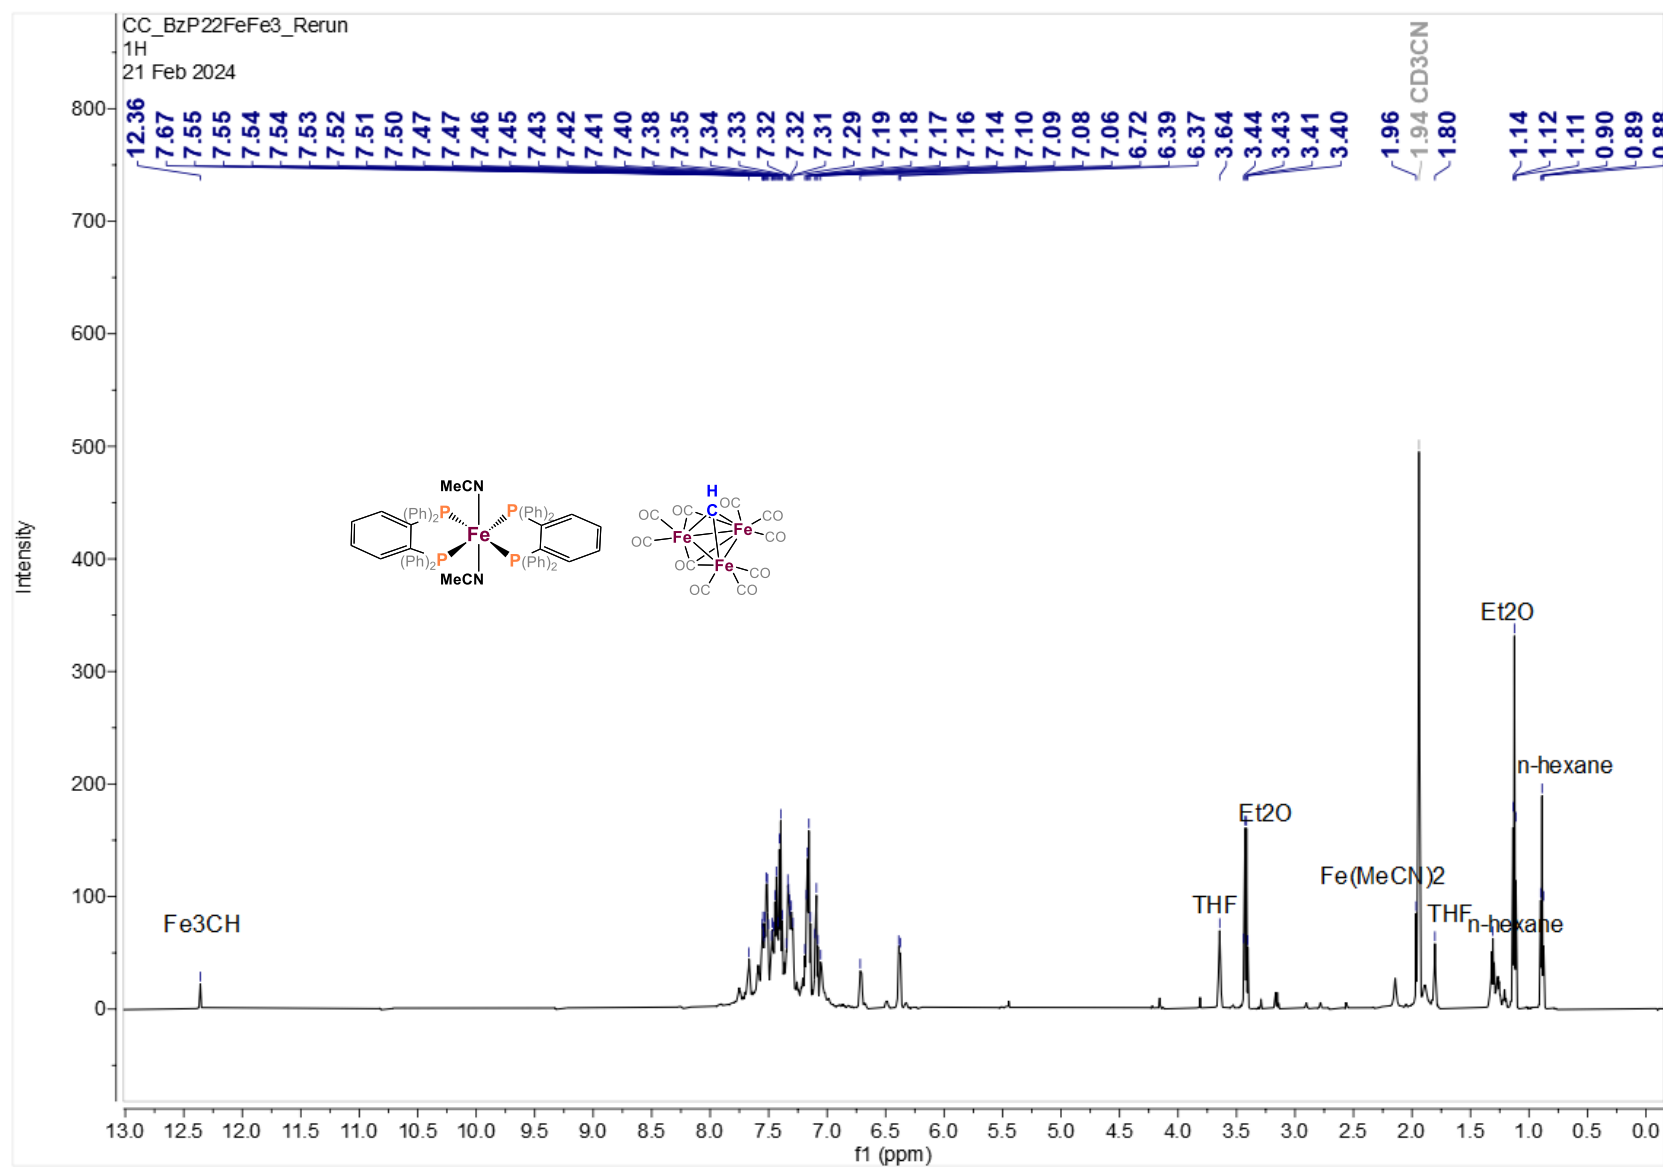

**Figure S18.**  $^1\text{H}$  NMR spectrum of  $[\text{Fe}_3(\mu_3\text{-CH})(\mu_3\text{-CO})(\text{CO})_9][(\text{bdpb})_2\text{Fe}(\text{MeCN})_2]$  (**6**) in  $d_3\text{-MeCN}$  at 25 °C.



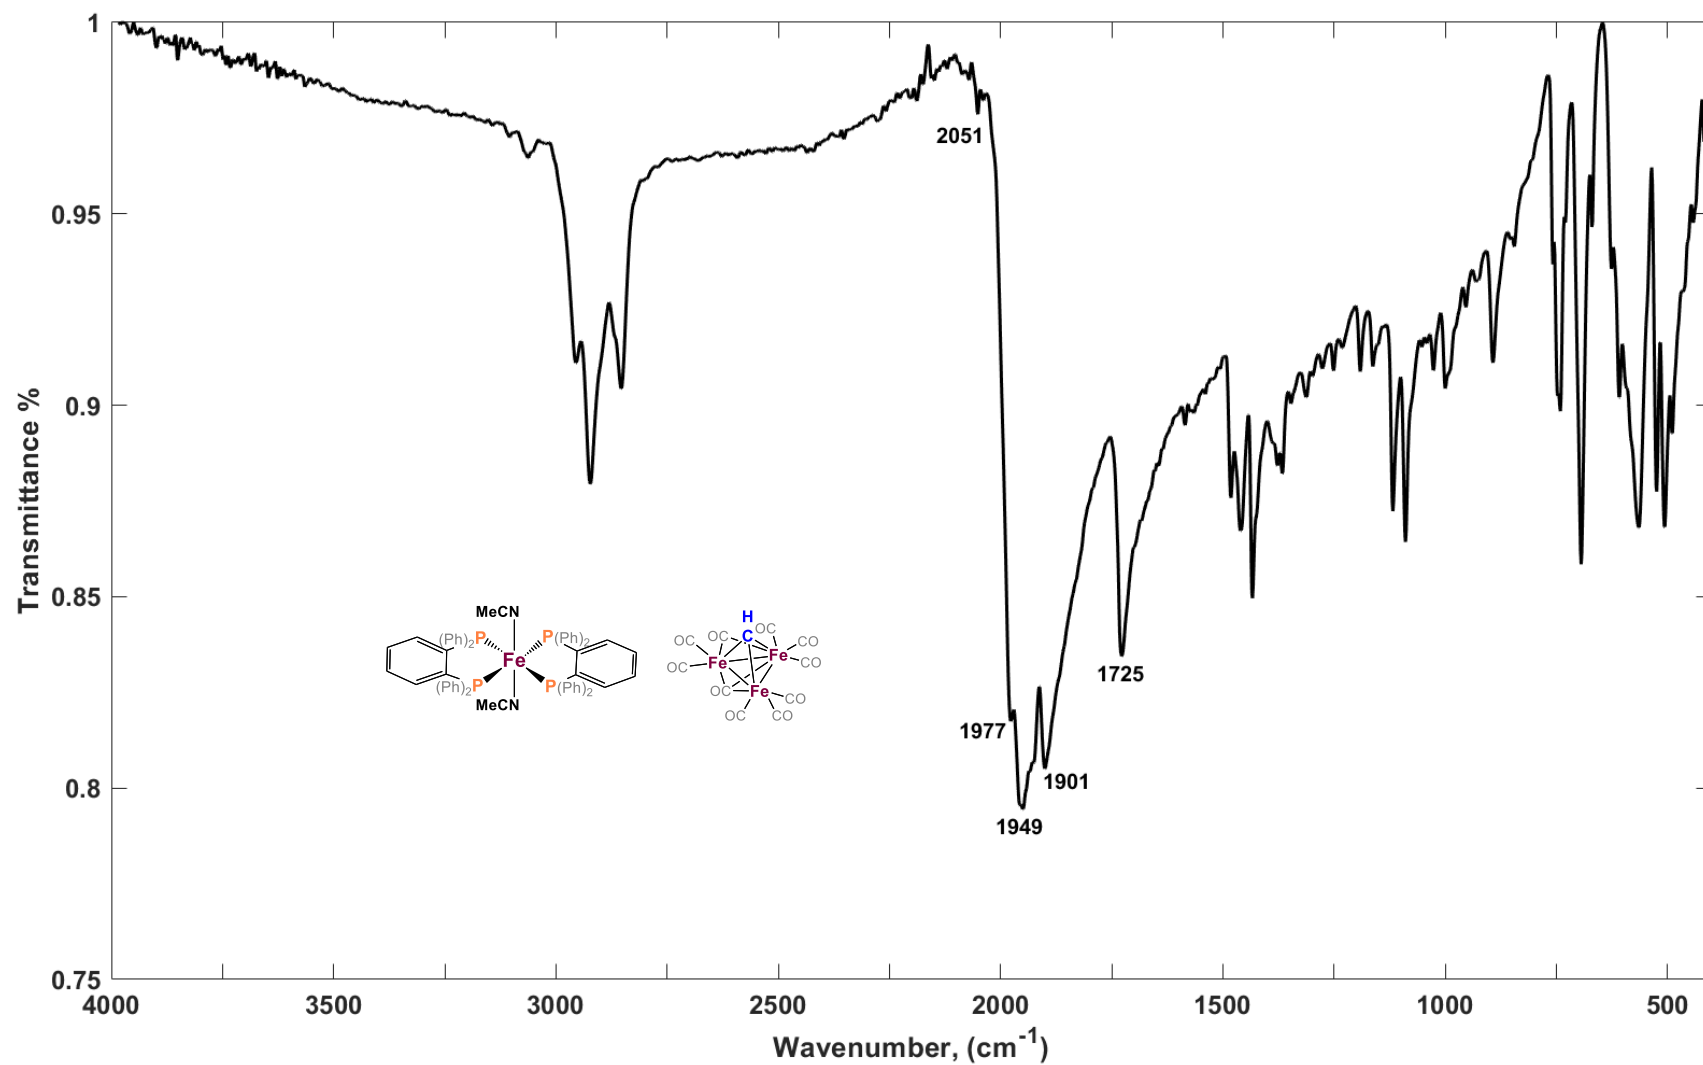

**Figure S20.** IR spectrum of  $[Fe_3(\mu_3-CH)(\mu_3-CO)(CO)_9][(bdpb)_2Fe(MeCN)_2]$  (**6**) in the solid state.

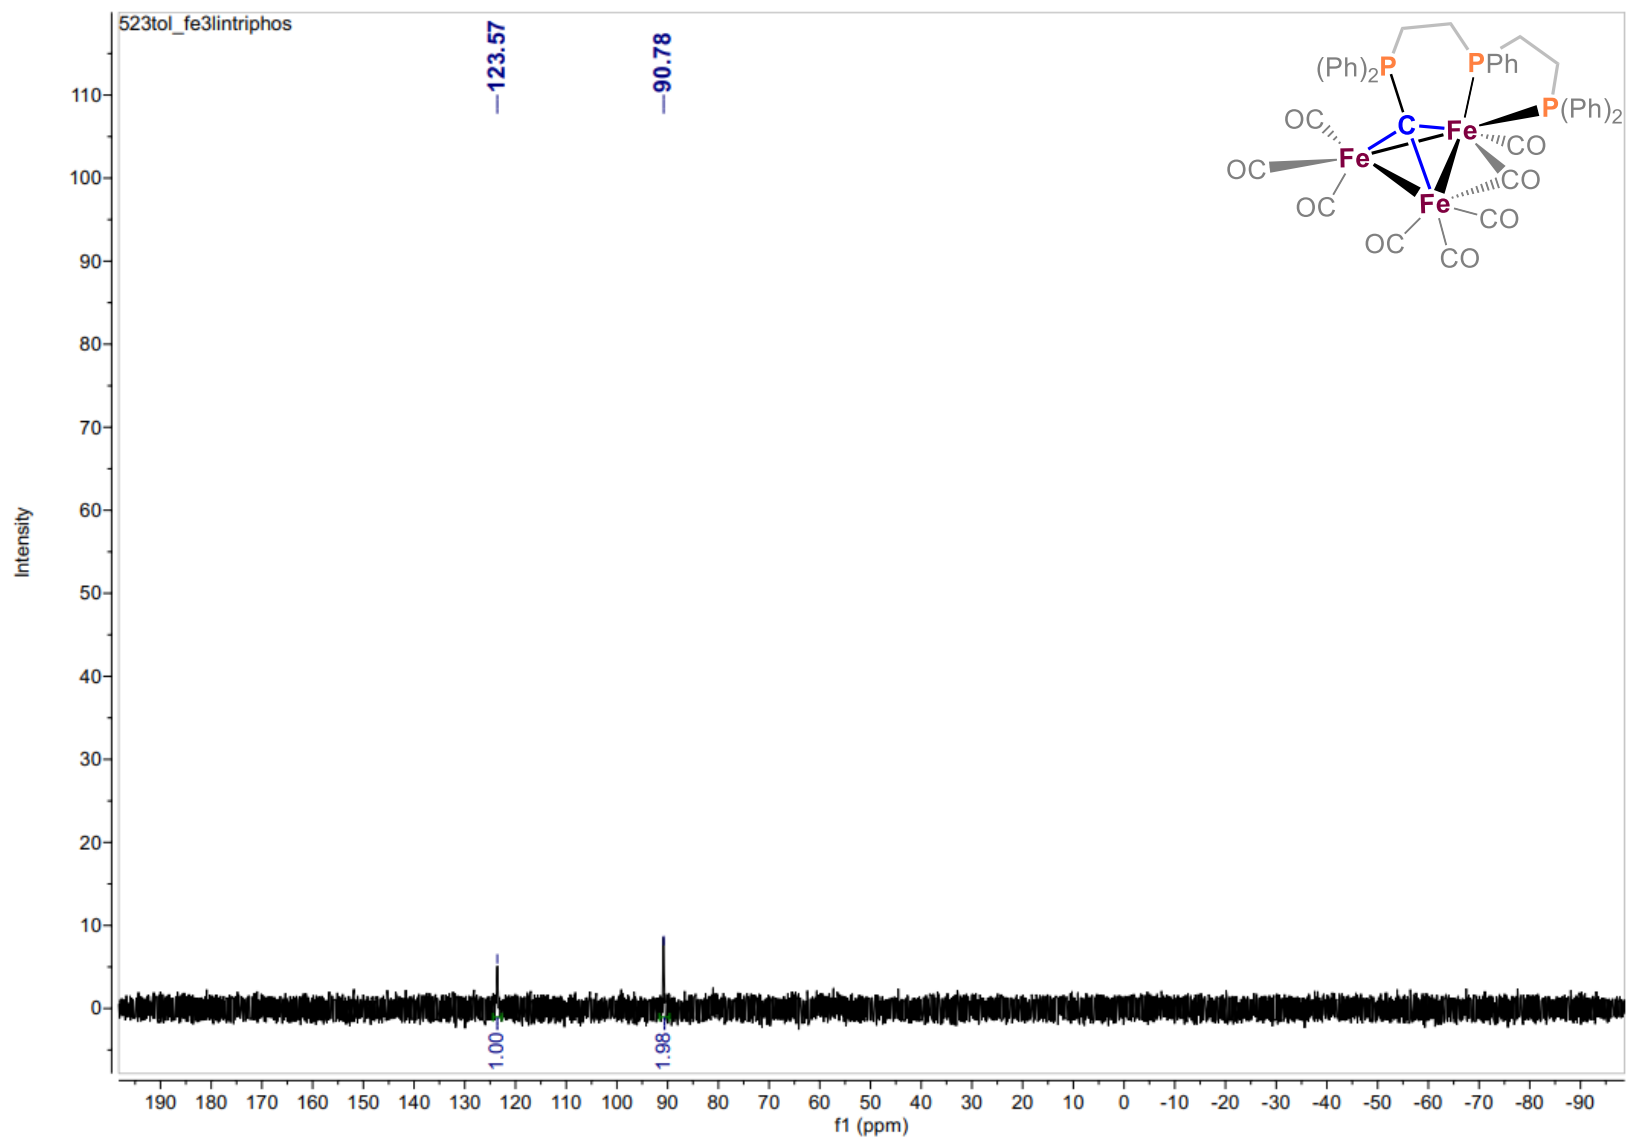

**Figure S21.**  $^{31}\text{P}\{^1\text{H}\}$  NMR spectrum of  $[\text{Fe}_3\{\mu_3\text{-C-P(Ph}_2\text{)C}_2\text{H}_4\text{(PhP)C}_2\text{H}_4\text{(PPh}_2\text{)}\}]$  (**7**) in  $d_8$ -toluene at 25 °C.

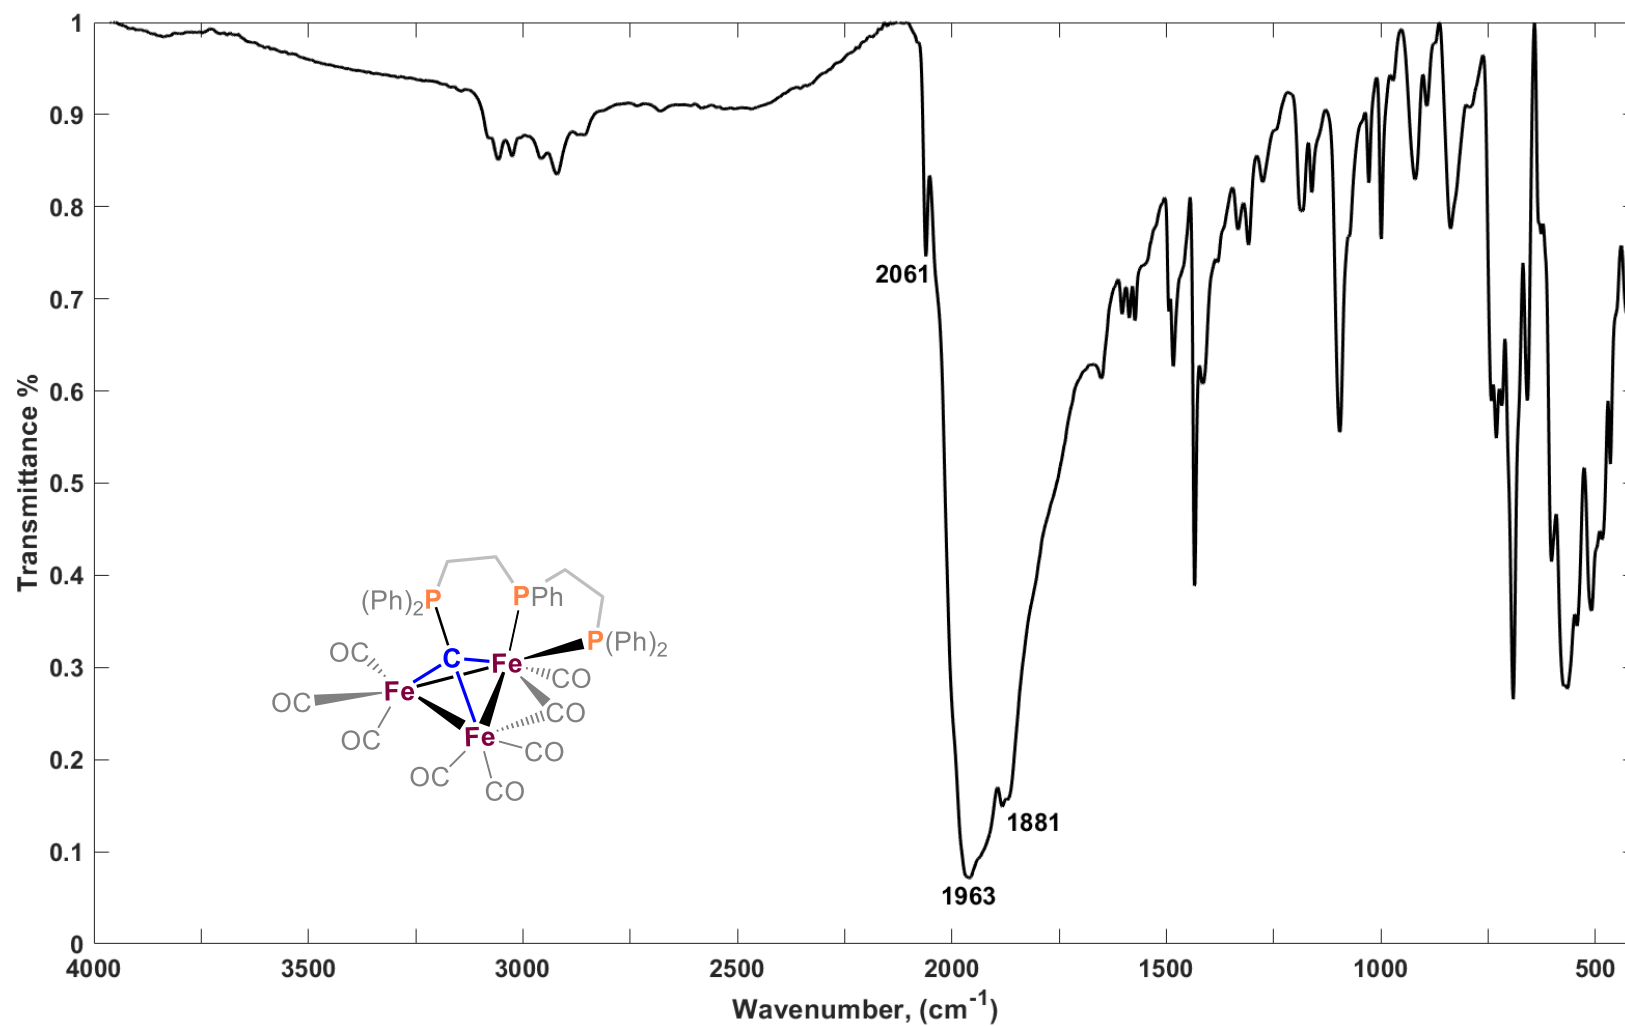

**Figure S22.** IR spectrum of [Fe<sub>3</sub>{μ<sub>3</sub>-C-P(Ph)<sub>2</sub>C<sub>2</sub>H<sub>4</sub>(PhP)C<sub>2</sub>H<sub>4</sub>(PPh<sub>2</sub>)}] (**7**) in the solid state.

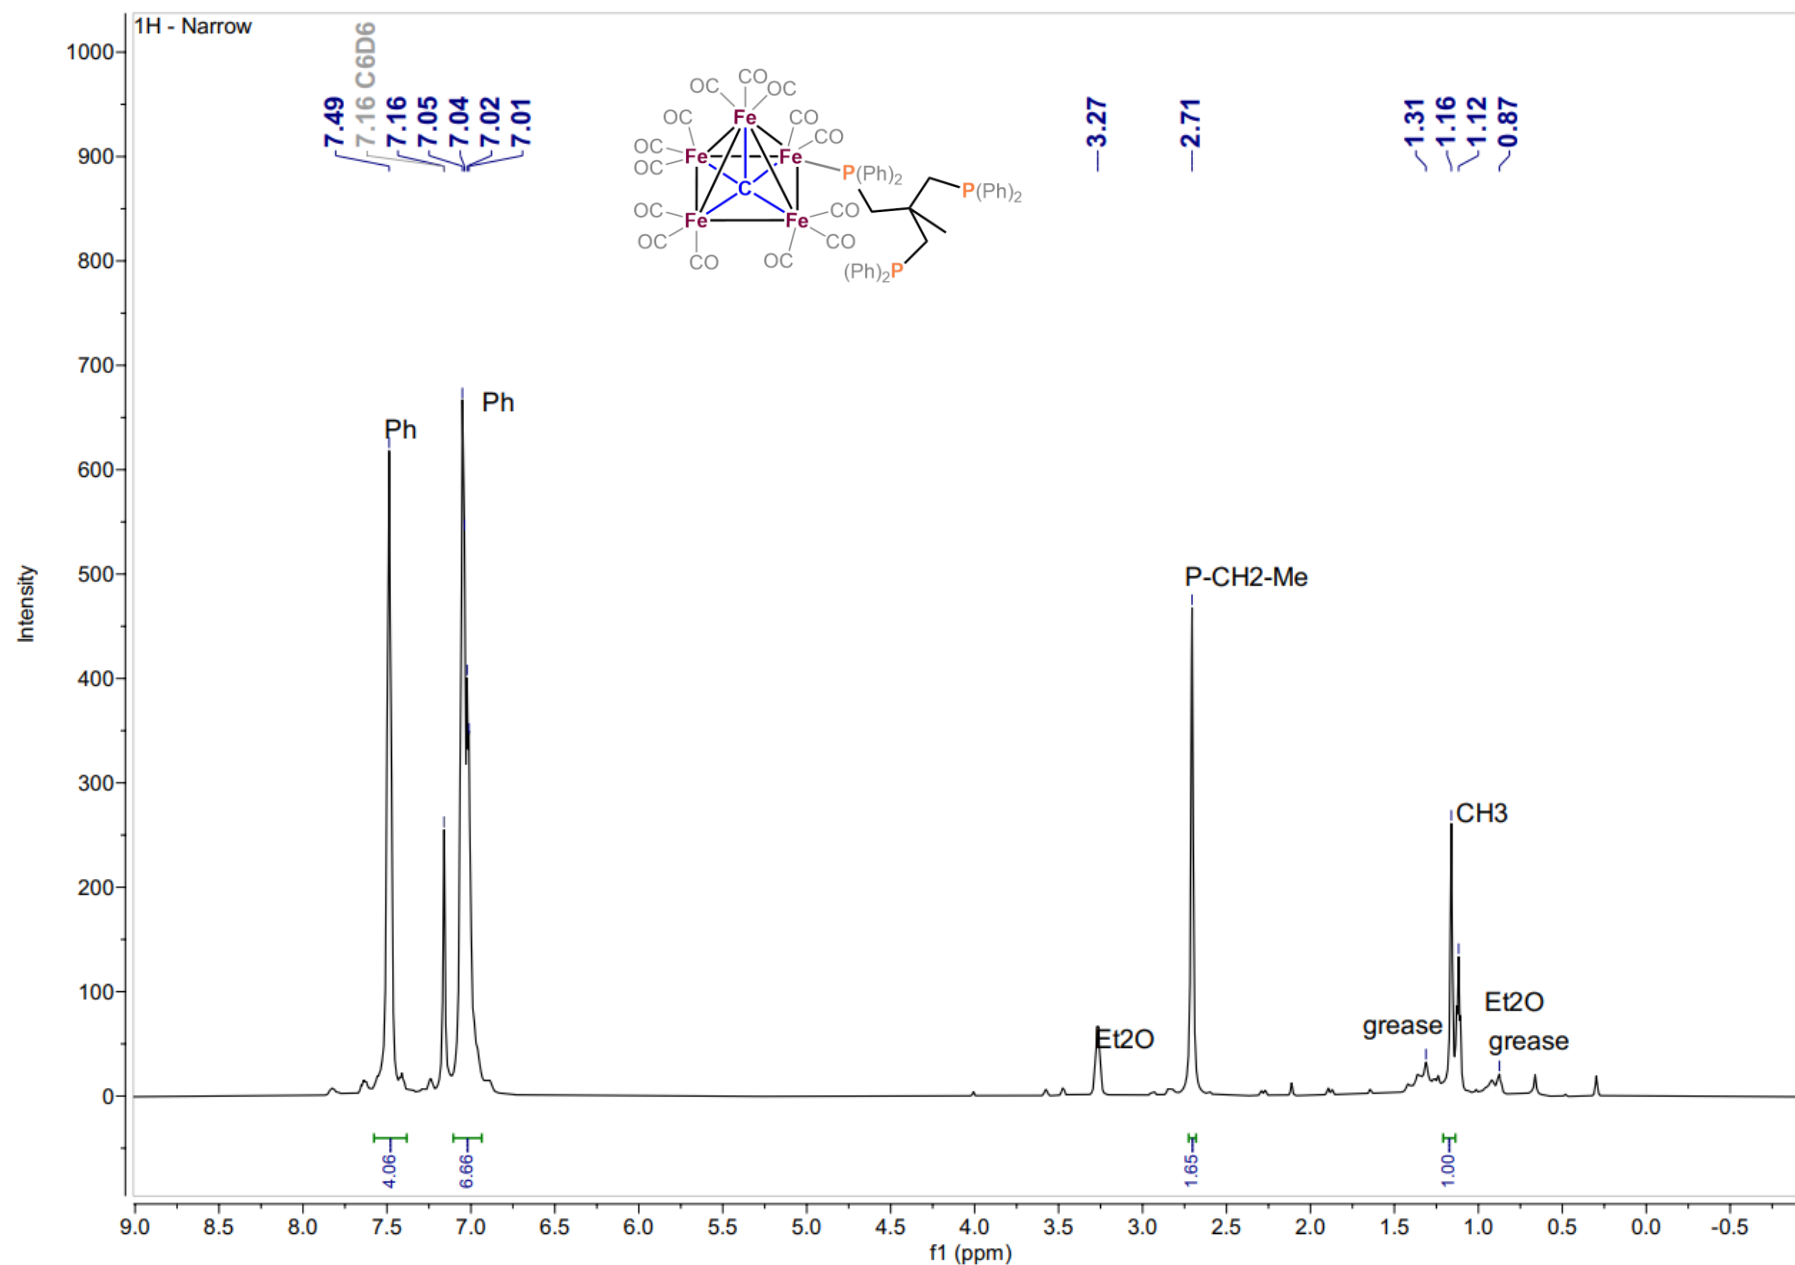

**Figure S23.**  $^1\text{H}$  NMR spectrum of  $[\text{Fe}_5(\mu_5\text{-C})(\kappa_1\text{-Triphos})(\text{CO})_{14}]$  (8) in  $\text{C}_6\text{D}_6$  at 25 °C.

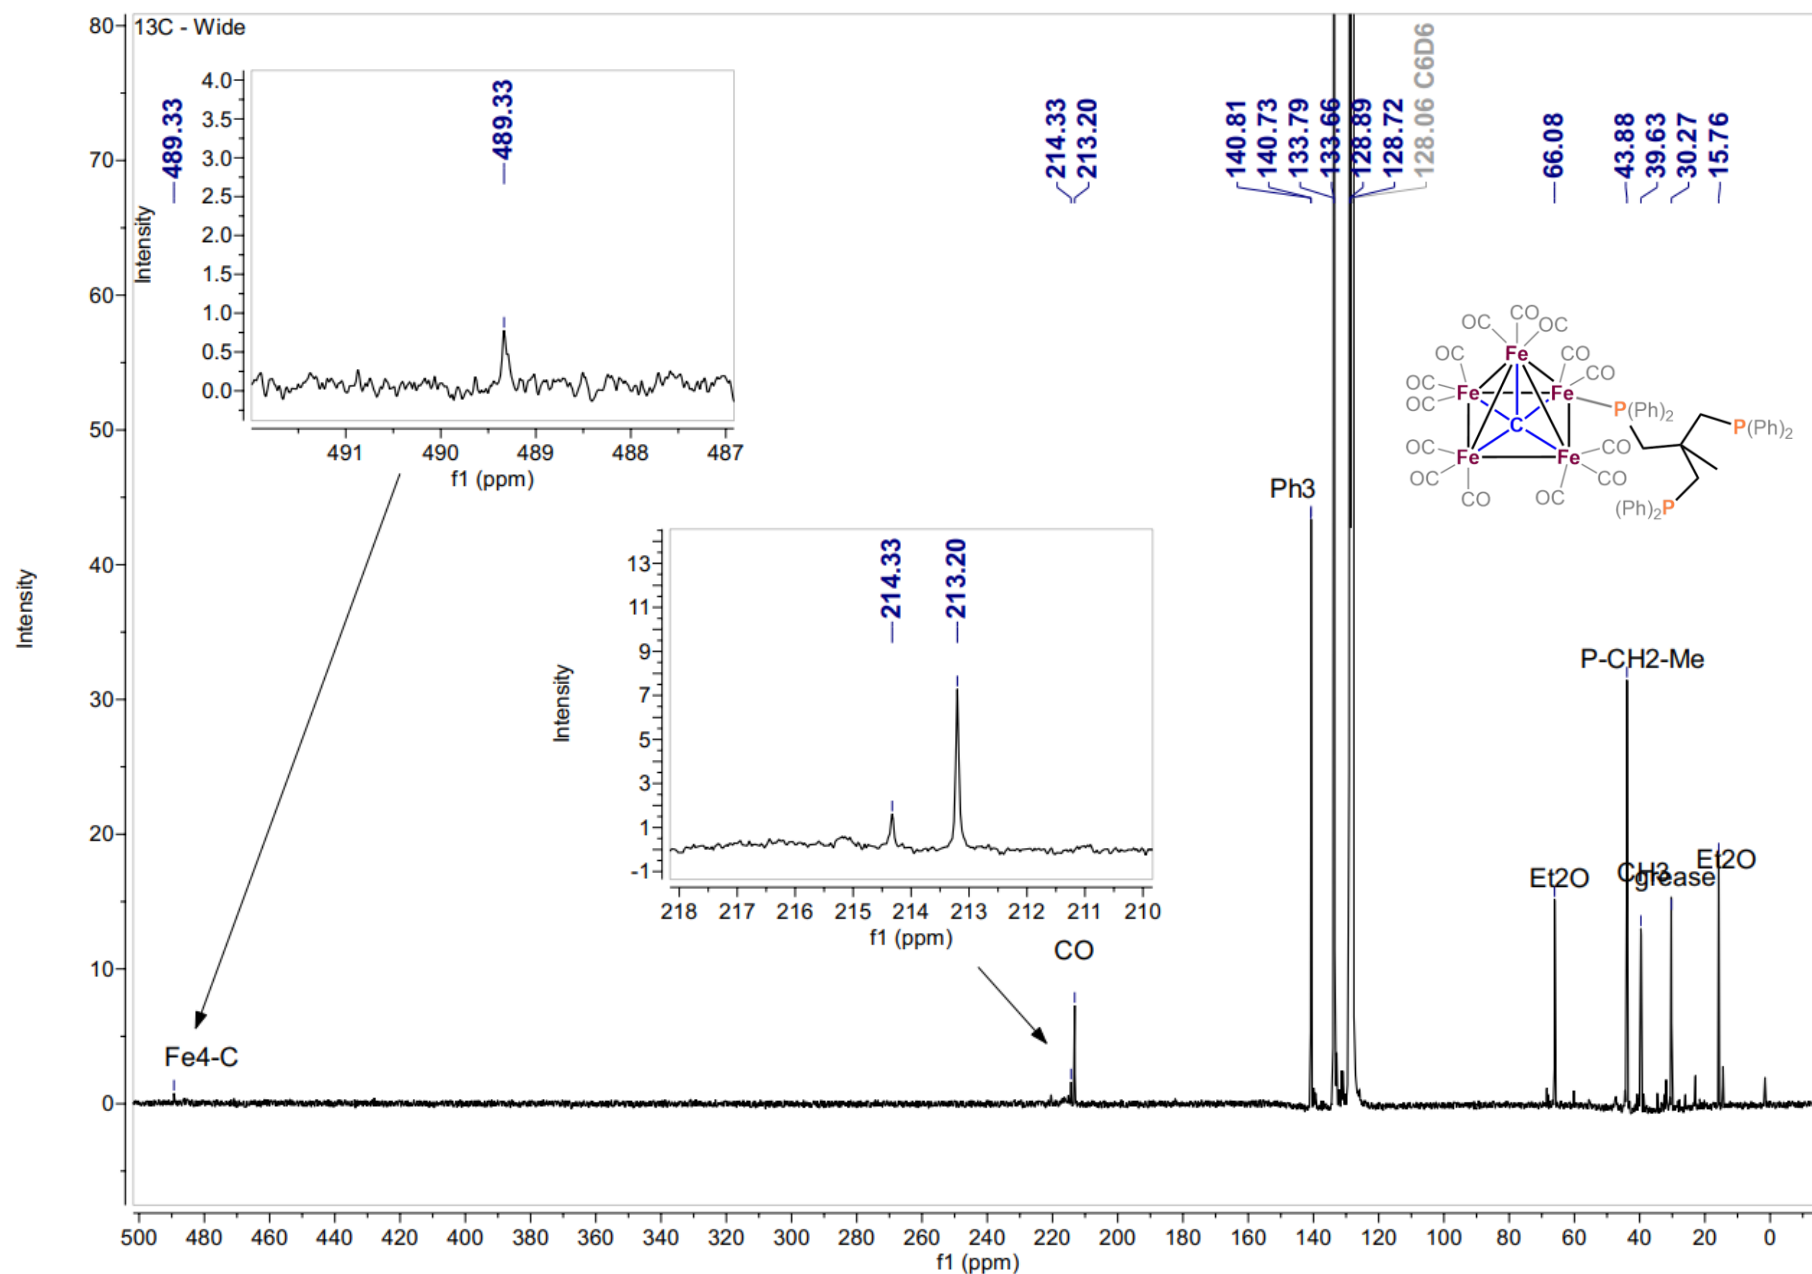

**Figure S24.**  $^{13}\text{C}$  NMR spectrum of  $[\text{Fe}_5(\mu_5\text{-C})(\kappa_1\text{-Triphos})(\text{CO})_{14}]$  (**8**) in  $\text{C}_6\text{D}_6$  at 25 °C.

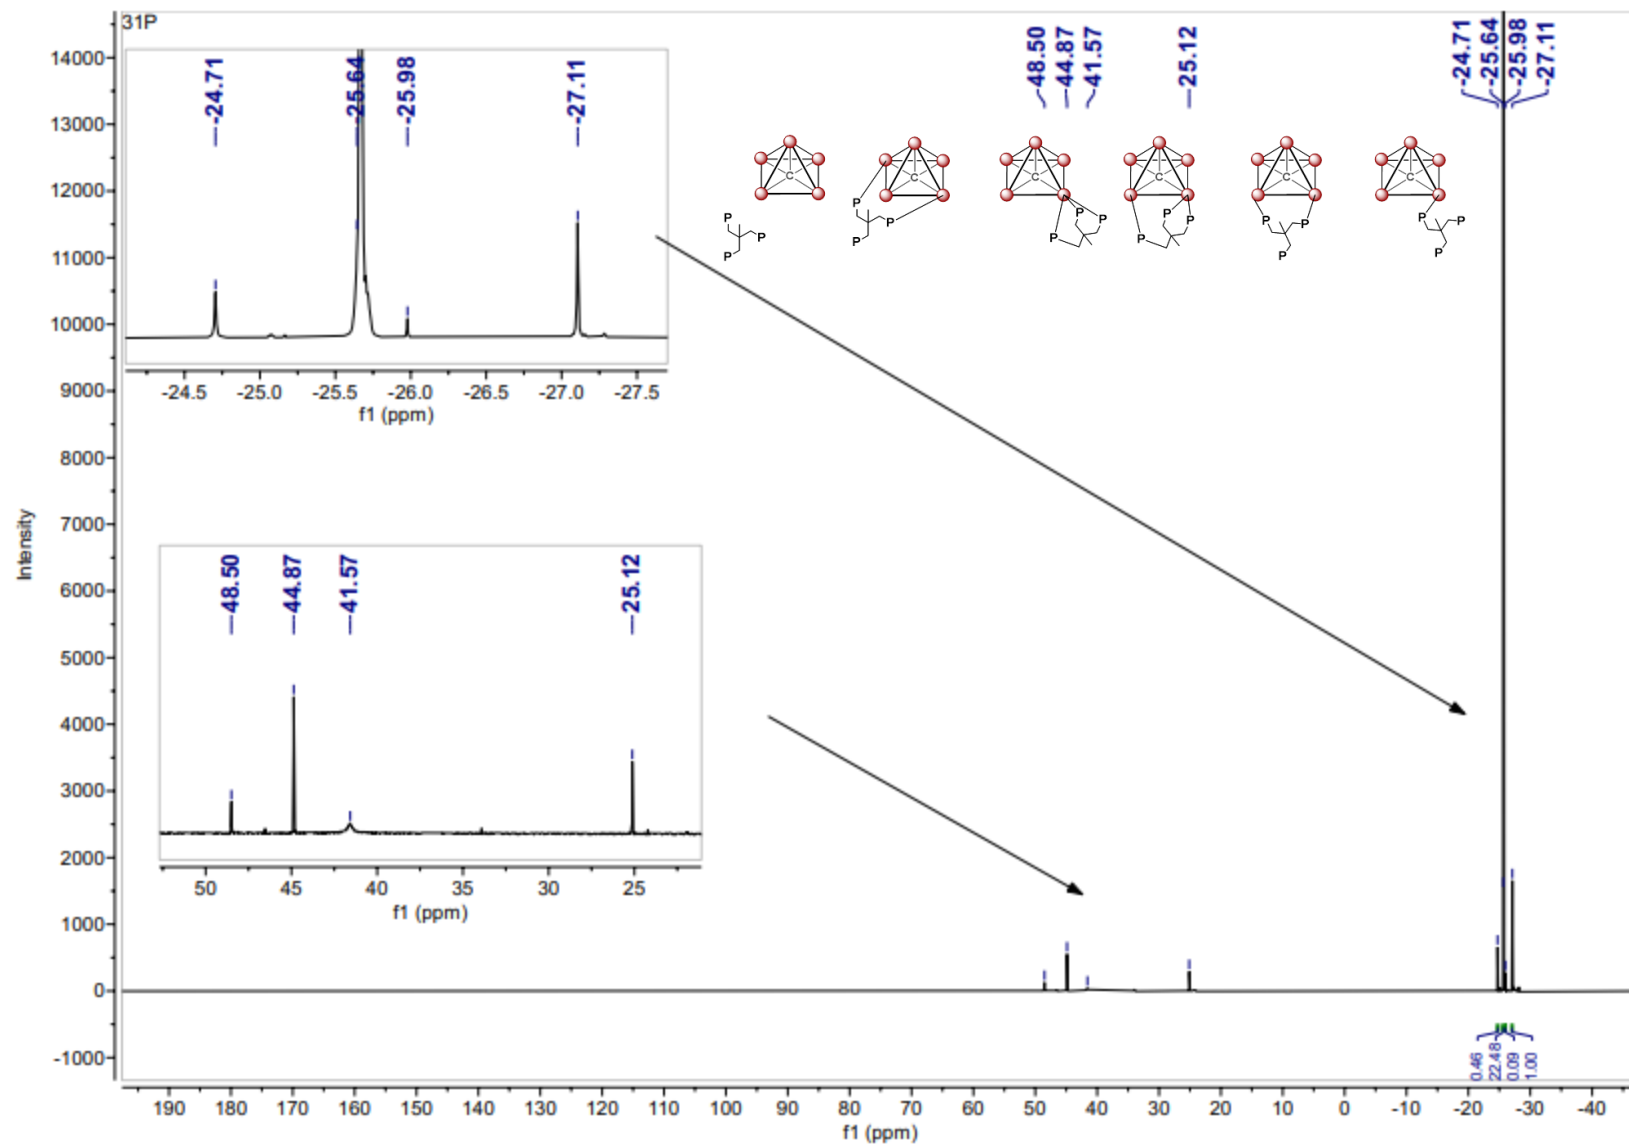

**Figure S25.**  $^{31}\text{P}$  NMR spectrum of  $[\text{Fe}_5(\mu_5\text{-C})(\kappa_1\text{-Triphos})(\text{CO})_{14}]$  (**8**) in  $\text{C}_6\text{D}_6$  at 25 °C. Possible binding modes of the Triphos ligand in dynamic equilibrium shown as an overlaid scheme.

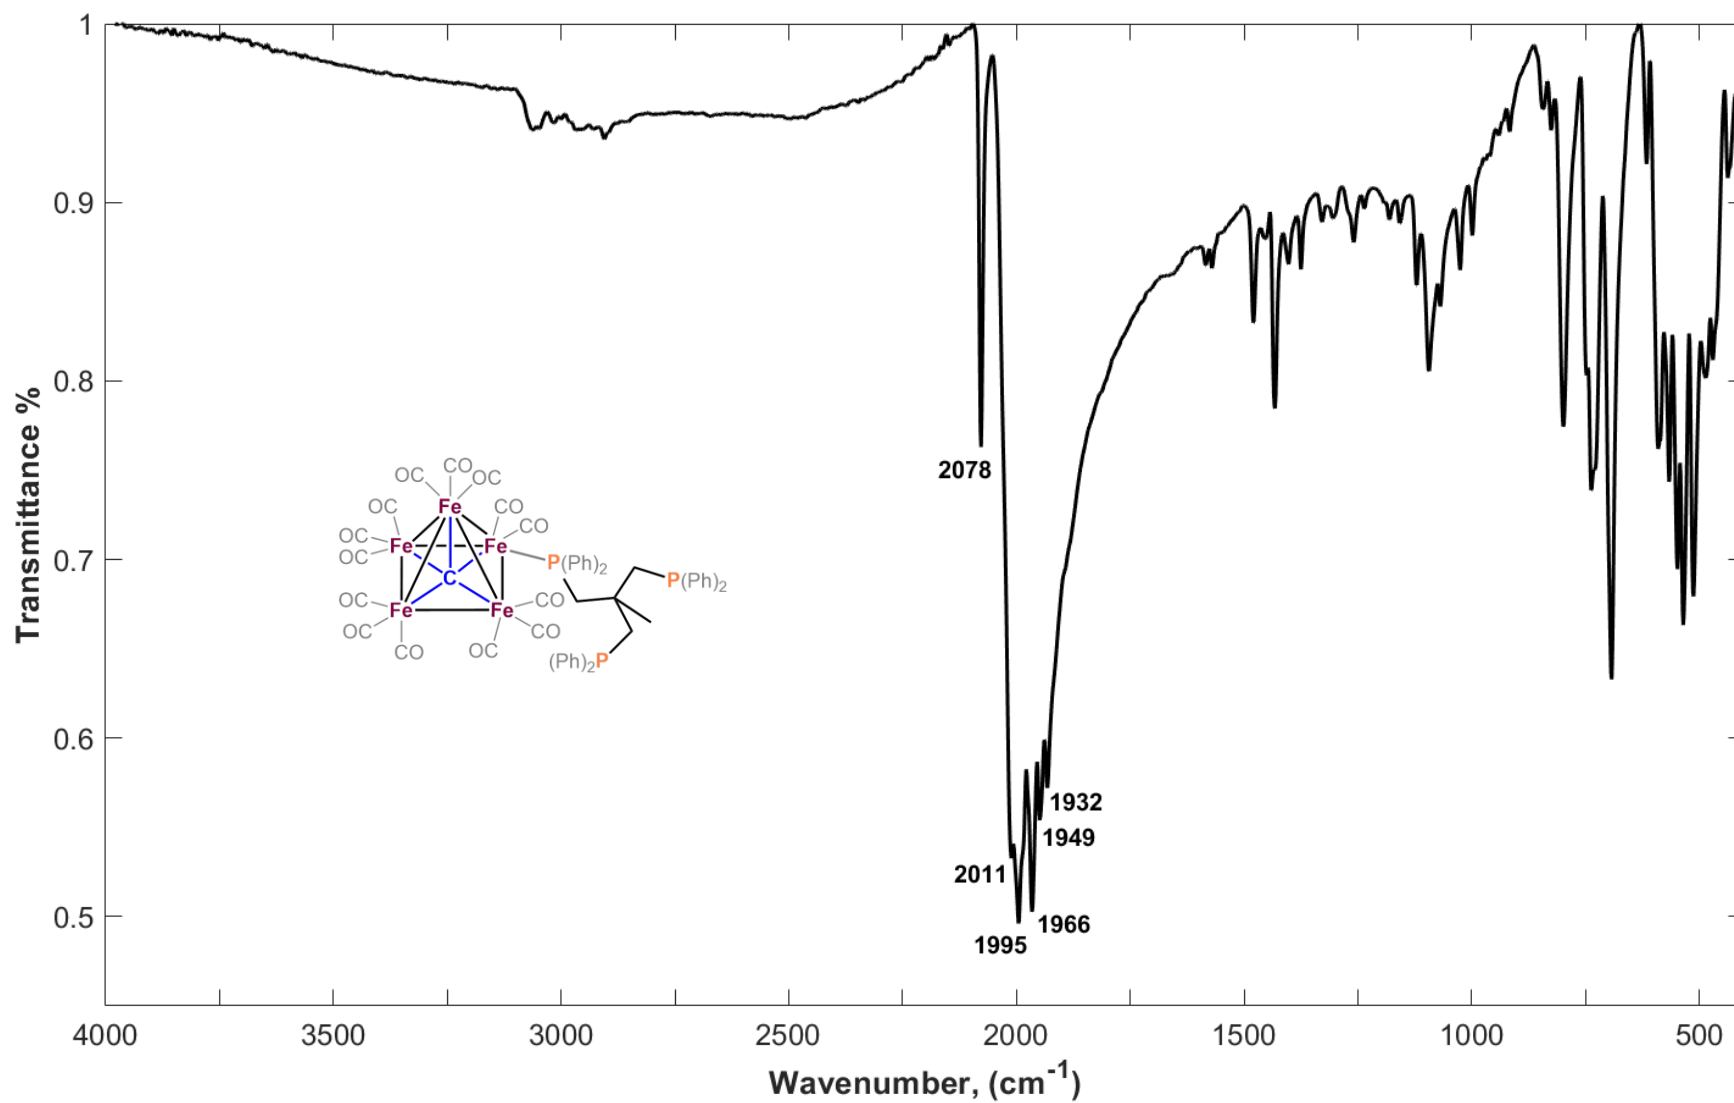

**Figure S26.** IR spectrum of  $[\text{Fe}_5(\mu_5\text{-C})(\kappa_1\text{-Tripfos})(\text{CO})_{14}]$  (**8**) in the solid state.

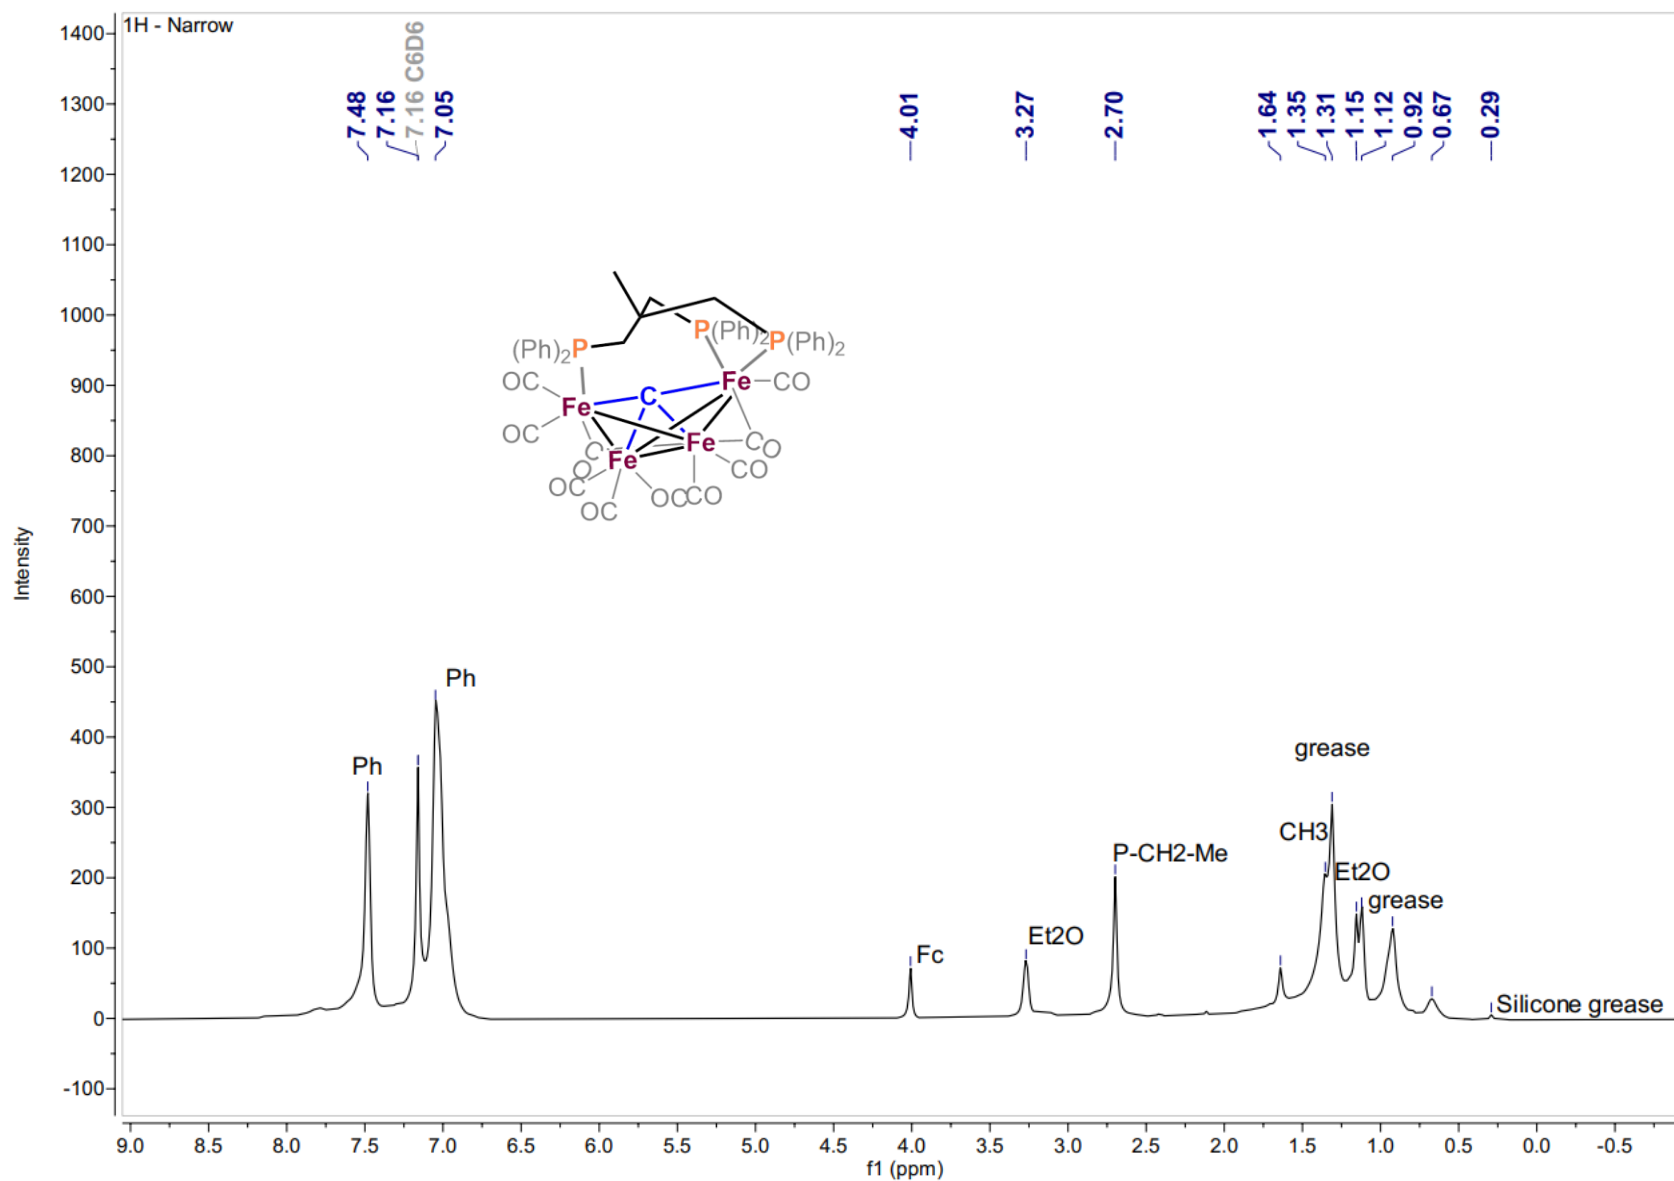

**Figure S27.**  $^1\text{H}$ -NMR spectrum of  $[\text{Fe}_4(\mu_4\text{-C})(\kappa_3\text{-Triphos})(\text{CO})_{10}]$  (**9**) in  $\text{C}_6\text{D}_6$  at 25 °C.

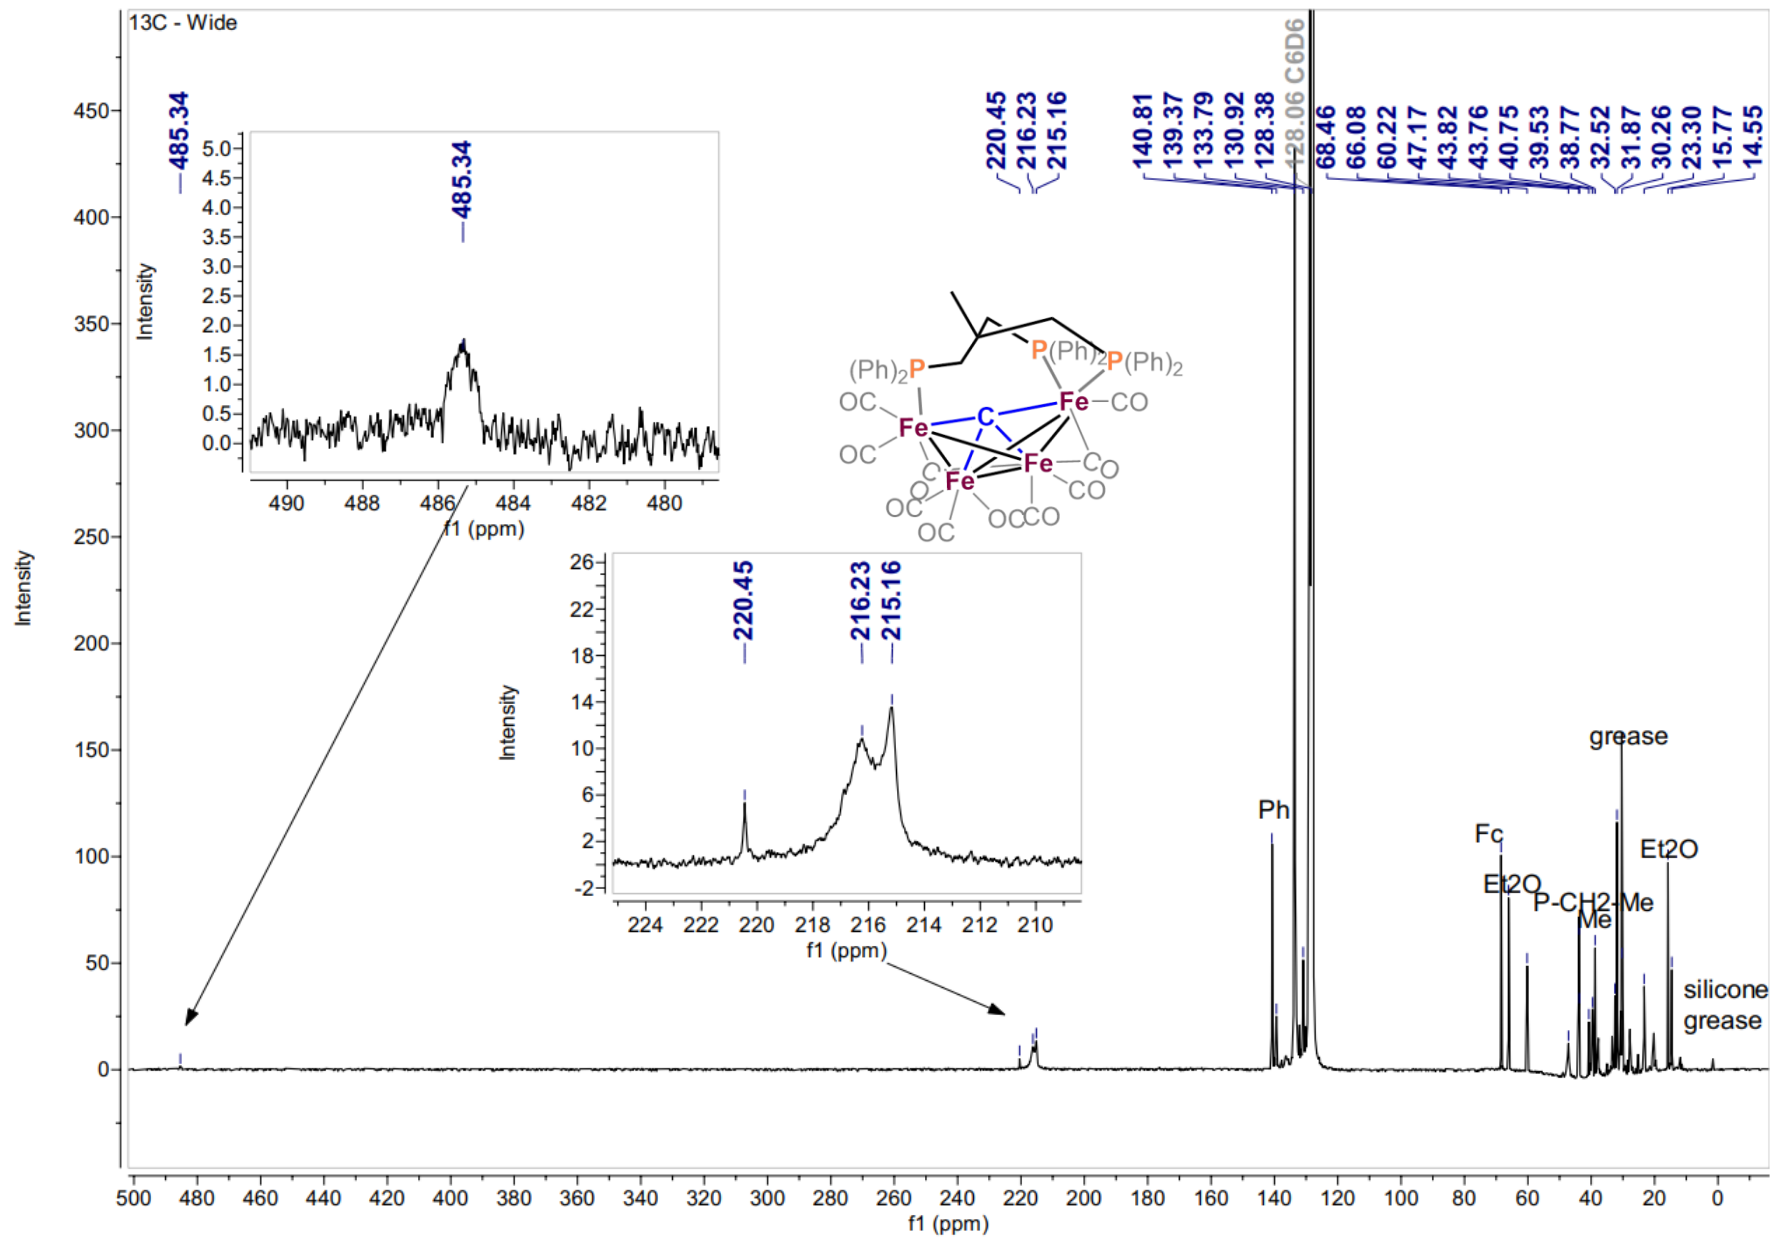

**Figure S28.**  $^{13}\text{C}$  NMR spectrum with carbide region (inset) of  $[\text{Fe}_4(\mu_4\text{-C})(\kappa_3\text{-Triphos})(\text{CO})_{10}]$  (**9**) in  $\text{C}_6\text{D}_6$  at 25 °C.

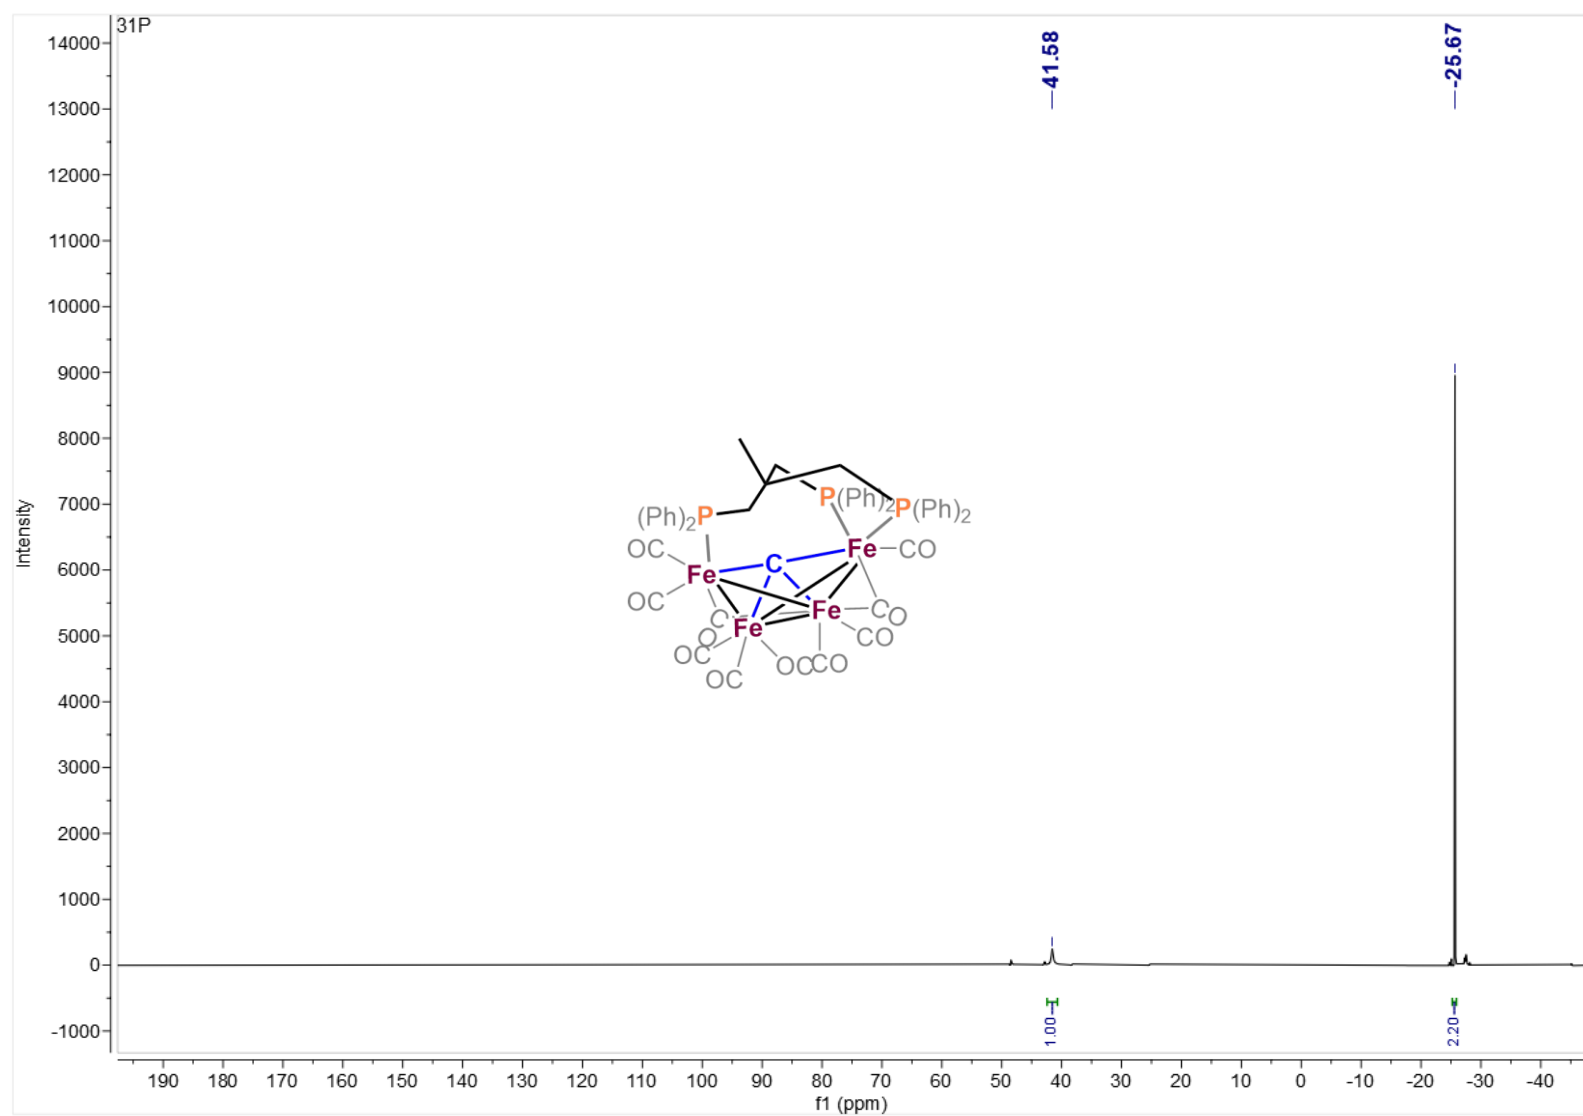

**Figure S29.**  $^{31}\text{P}\{^1\text{H}\}$  NMR spectrum of  $[\text{Fe}_4(\mu_4\text{-C})(\kappa_3\text{-Triphos})(\text{CO})_{10}]$  (9) in  $\text{C}_6\text{D}_6$  at  $25^\circ\text{C}$ .

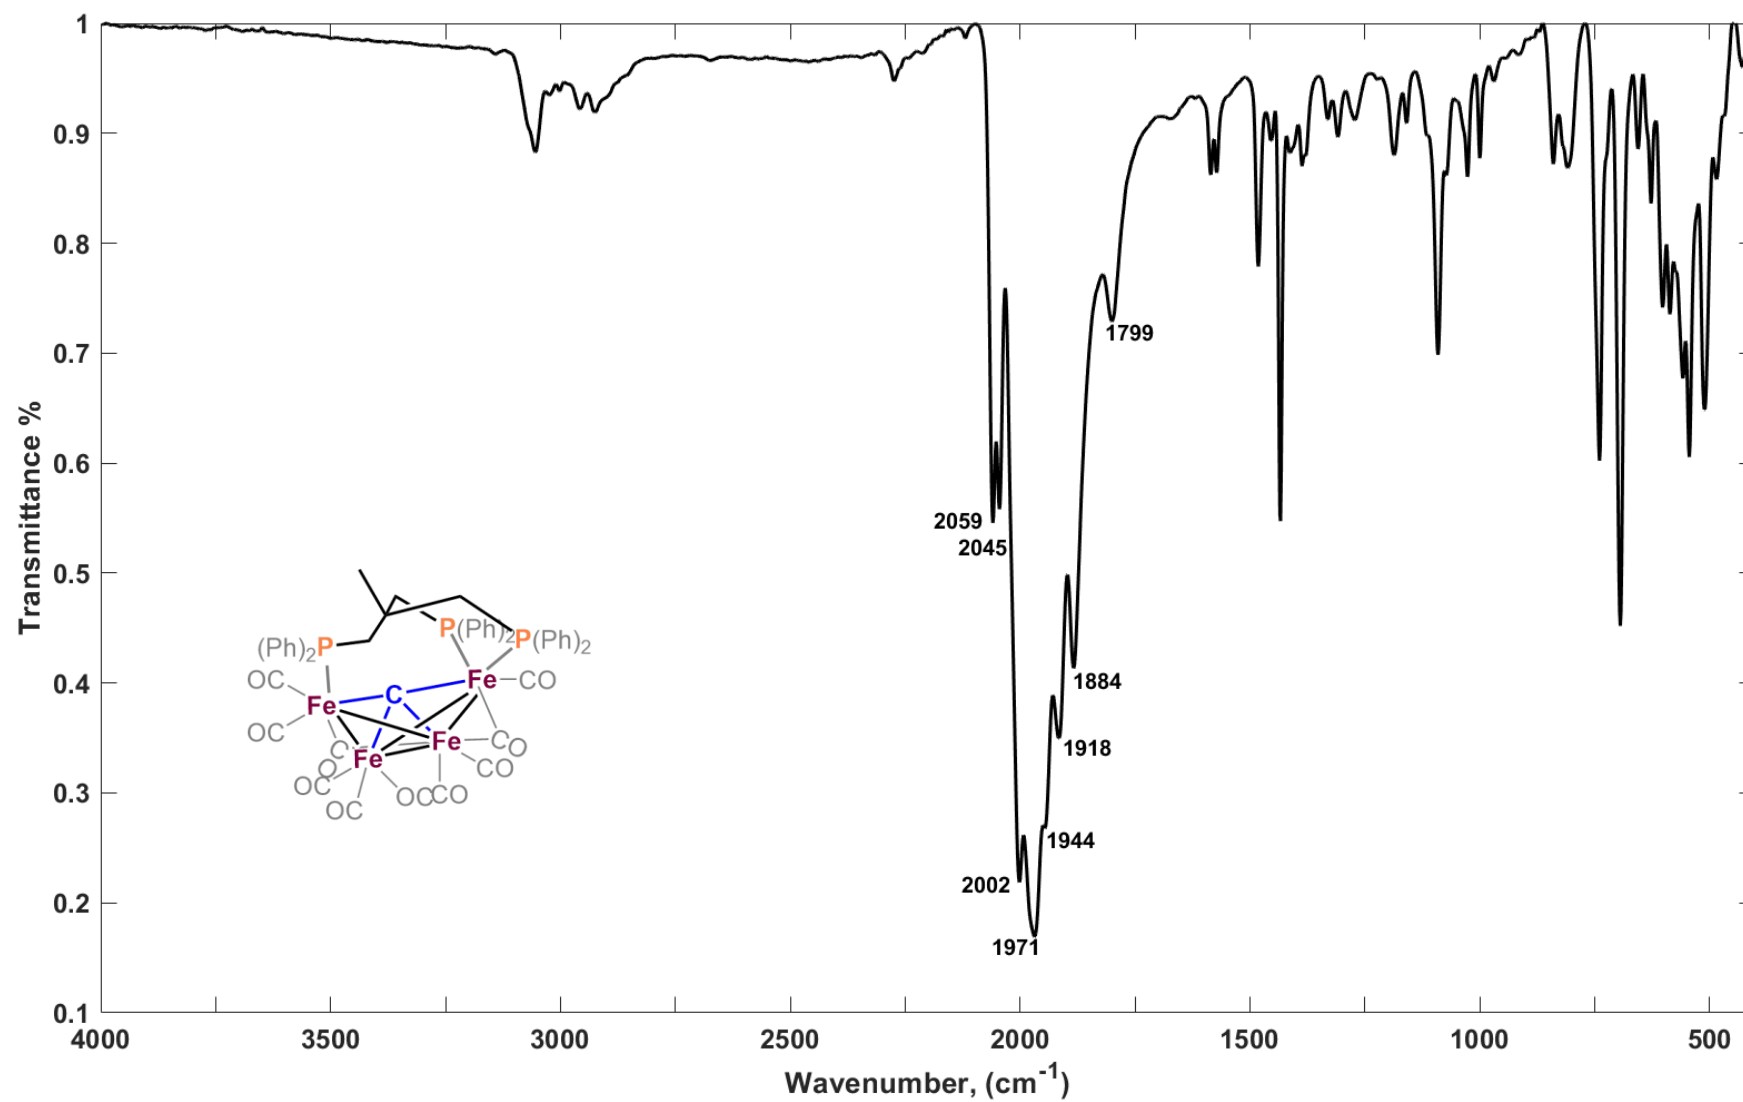

**Figure S30.** IR spectrum of  $[\text{Fe}_4(\mu_4\text{-C})(\kappa_3\text{-Triphos})(\text{CO})_{10}]$  (**9**) in the solid state.

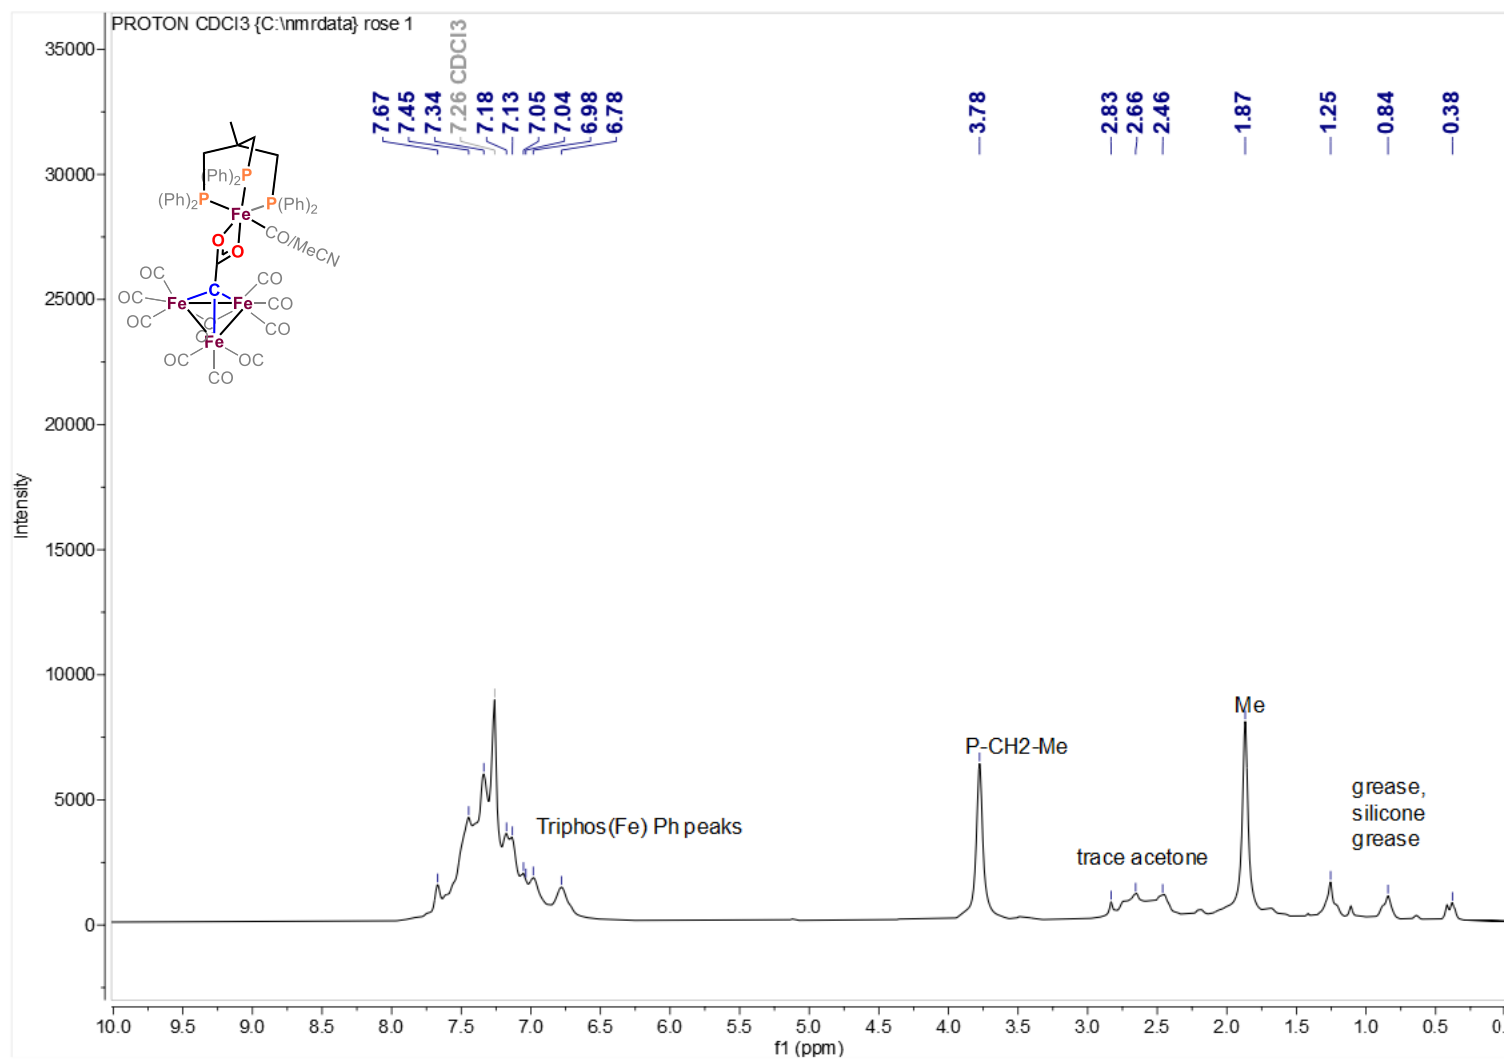

**Figure S31.** <sup>1</sup>H-NMR spectrum of [Fe<sub>3</sub>(CO)<sub>8</sub>(μ<sub>3</sub>-CO)(μ<sub>3</sub>-aceto-κ<sub>2</sub>-O)Fe(CO)(κ<sub>3</sub>-Triphos)] (**10**) in CDCl<sub>3</sub> at 25 °C.

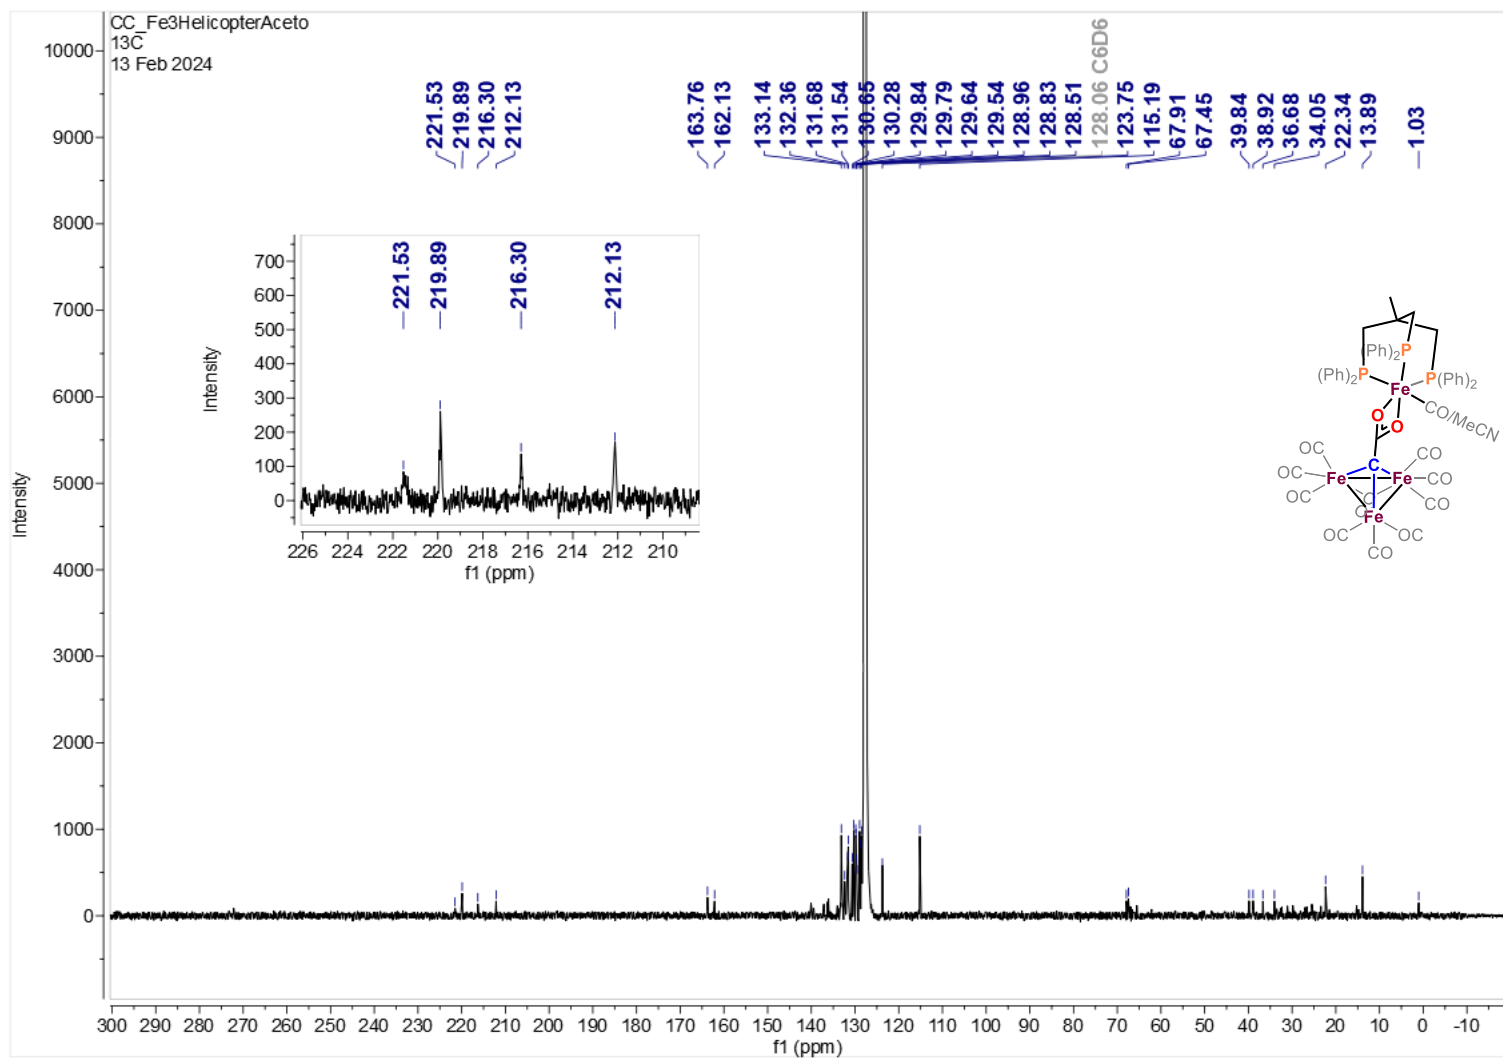

**Figure S32.** <sup>13</sup>C NMR spectrum of [Fe<sub>3</sub>(CO)<sub>8</sub>(μ<sub>3</sub>-CO)(μ<sub>3</sub>-aceto-κ<sub>2</sub>-O)Fe(CO)(κ<sub>3</sub>-Triphos)] (**10**) in C<sub>6</sub>D<sub>6</sub> at 25 °C. (Working on new spectrum but no luck so far)

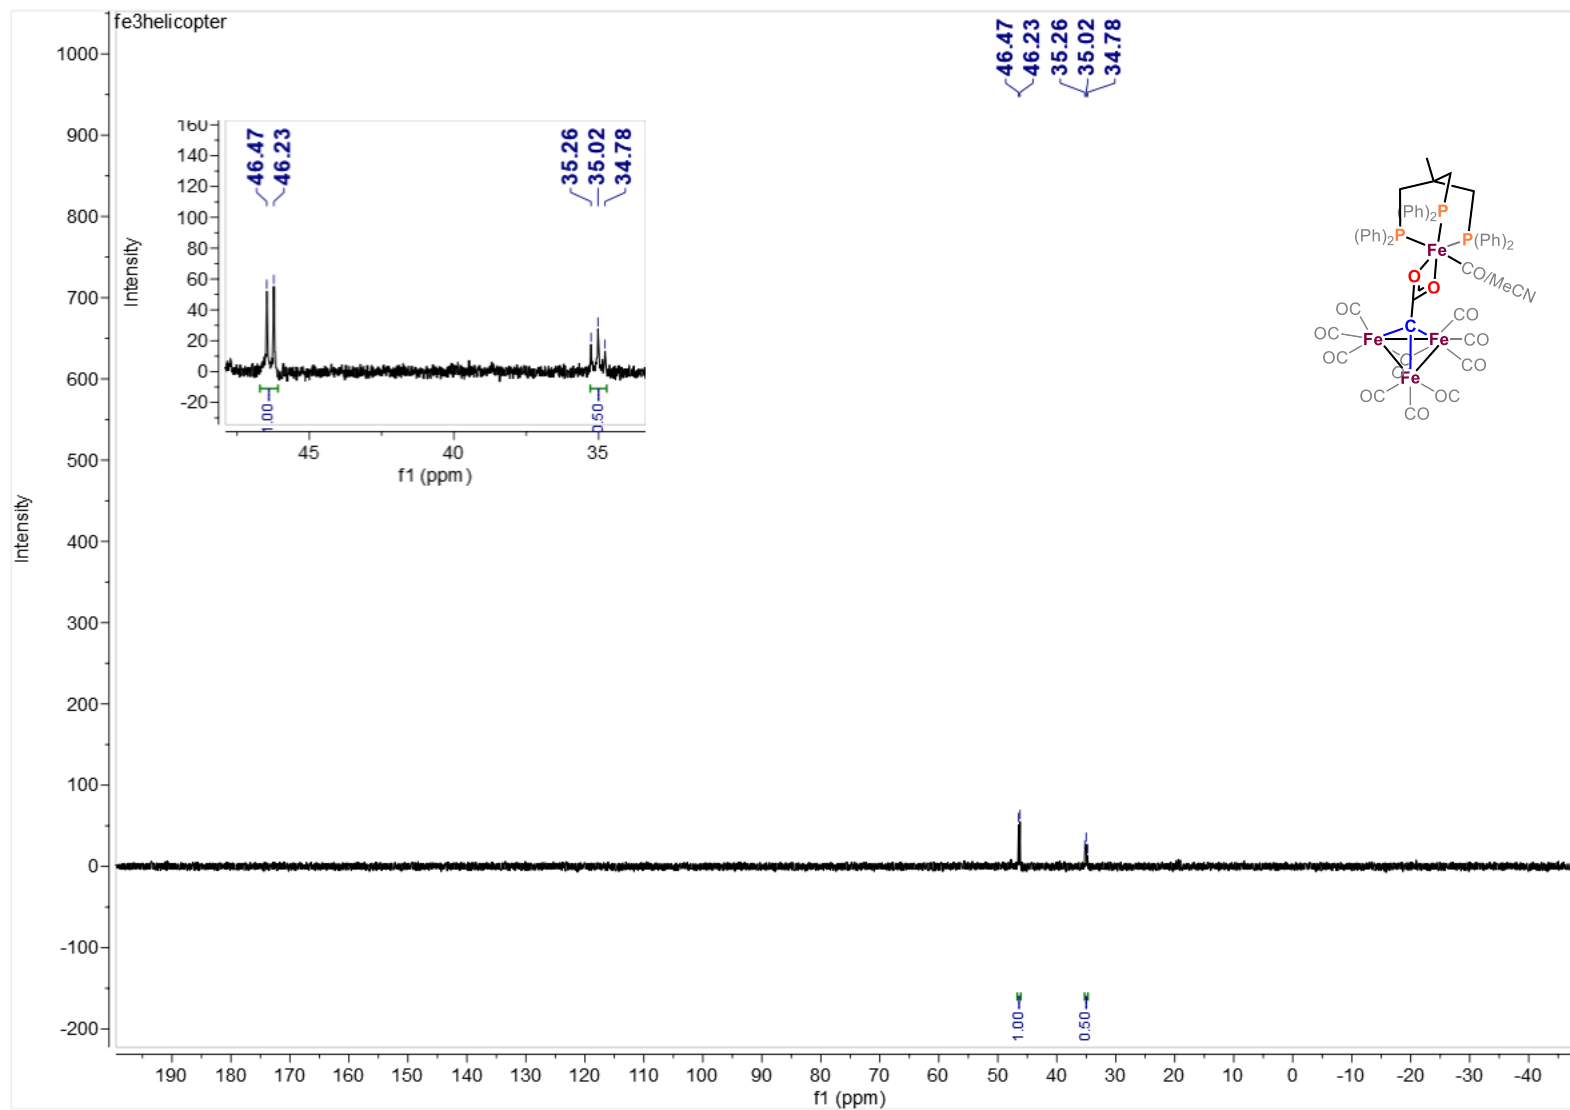

**Figure S33.**  $^{31}\text{P}\{^1\text{H}\}$  NMR spectrum of  $[\text{Fe}_3(\text{CO})_8(\mu_3\text{-CO})(\mu_3\text{-aceto-}\kappa_2\text{-O})\text{Fe}(\text{CO})(\kappa_3\text{-Triphos})]$  (**10**) in  $\text{CDCl}_3$  at  $25^\circ\text{C}$ .

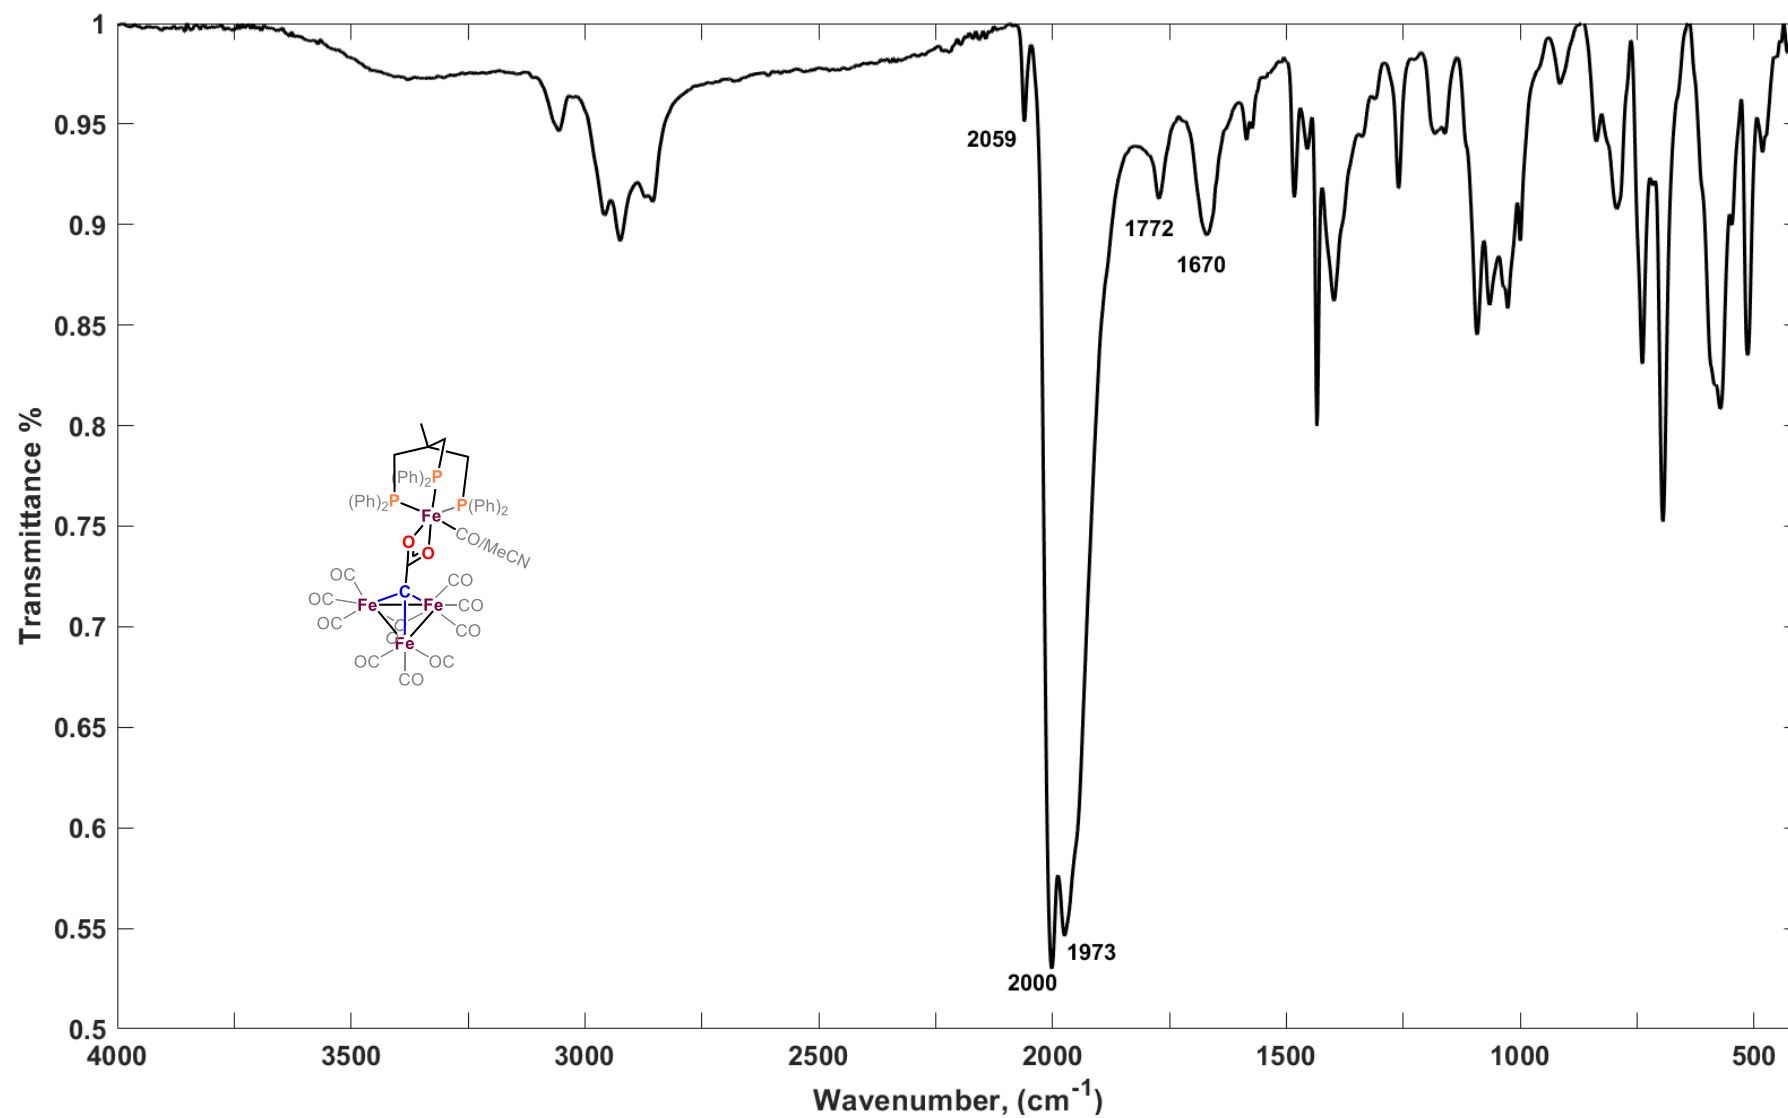

**Figure S34.** IR spectrum of  $[\text{Fe}_3(\text{CO})_8(\mu_3\text{-CO})(\mu_3\text{-aceto-}\kappa_2\text{-O})\text{Fe}(\text{CO})(\kappa_3\text{-Tripfos})]$  (**10**) in the solid state.

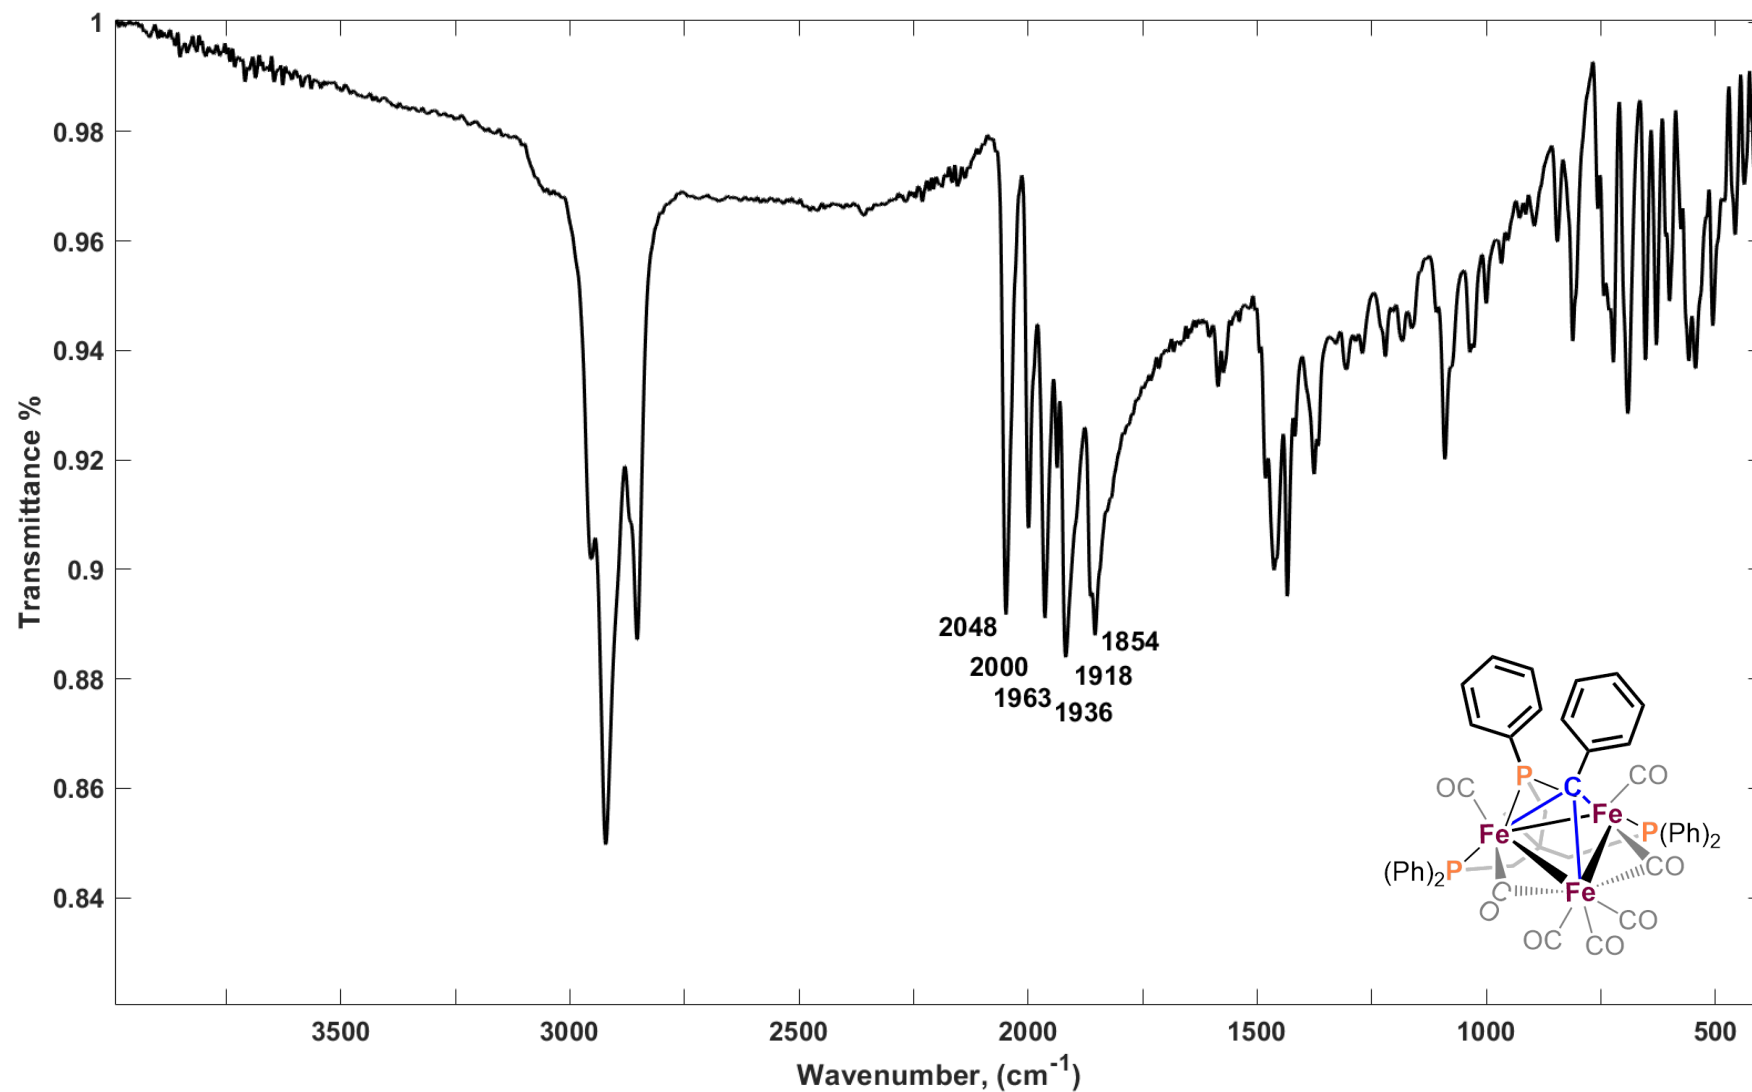

**Figure S35.** IR spectrum of [Fe<sub>3</sub>(μ<sub>3</sub>-CPh){Triphos(PPh<sub>2</sub>)<sub>2</sub>(PPh)}(CO)<sub>7</sub>] (**11**) in the solid state. Some contamination from trace paraffin oil (from crystal handling) is present but does not obscure the ν(CO) region.

**Table S1.** IR  $\nu(\text{CO})$  features for all complexes and relevant literature comparisons. Solid state IR data unless otherwise indicated. Literature values obtained as indicated: (a) from Kuppuswamy *et al.* 2017;<sup>1</sup> (b) from Cooke and Mays, 1975;<sup>4</sup> (c) from Bradley *et al.* 1981;<sup>5</sup> and (d) from Taheri *et al.*, 2016.<sup>6</sup>

| Metal Cluster                                                                                                                                                                        | $\nu(\text{CO})$ ( $\text{cm}^{-1}$ )                                                                                                                  |
|--------------------------------------------------------------------------------------------------------------------------------------------------------------------------------------|--------------------------------------------------------------------------------------------------------------------------------------------------------|
| [NEt <sub>4</sub> ] <sub>2</sub> [Fe <sub>6</sub> ( $\mu_6$ -C)(CO) <sub>16</sub> ] ( <b>1</b> )                                                                                     | Terminal: 2034(w), 1918(s)<br>Bridging: 1742(m)                                                                                                        |
| <sup>a</sup> [Fe <sub>6</sub> ( $\mu_6$ -C)(CO) <sub>18</sub> ]                                                                                                                      | Terminal: 1970(s), 1875(m)                                                                                                                             |
| [Fe <sub>6</sub> ( $\mu_6$ -C)(CO) <sub>16</sub> ] ( <b>2</b> ) dropcast from MeCN                                                                                                   | Terminal: 2087(w), 2036(m), 1985(s), 1963(s)<br>Bridging: 1772(w) *may be residual Fe <sub>6</sub> <sup>2-</sup> in reaction solution                  |
| [Fe <sub>6</sub> ( $\mu_6$ -C)(CO) <sub>16</sub> ] ( <b>2</b> ) dropcast from DCE                                                                                                    | Terminal: 2096(w), 2046(m), 2028(m) 1981(s), 1960(s)<br>Bridging: 1821(m), 1767(w)* may be residual Fe <sub>6</sub> <sup>2-</sup> in reaction solution |
| [Fe <sub>5</sub> ( $\mu_5$ -C)(CO) <sub>15</sub> ]                                                                                                                                   | Terminal: 2098(w), 2050(s), 2031(sh)                                                                                                                   |
| [Fe <sub>6</sub> ( $\mu_6$ -C)(CO) <sub>17</sub> ] ( <b>3</b> )                                                                                                                      | Terminal: 2096(w), 2023 (s)<br>Bridging: 1829(m)                                                                                                       |
| [Fe <sub>5</sub> ( $\mu_5$ -C)(CO) <sub>14</sub> (PPh <sub>3</sub> )] ( <b>4</b> )                                                                                                   | Terminal: 2079(m), 2005(s), 1987(s), 1959(s)                                                                                                           |
| NEt <sub>4</sub> [Fe <sub>5</sub> ( $\mu_5$ -C)( $\mu_2$ -H)(CO) <sub>13</sub> (PPh <sub>3</sub> )] ( <b>5</b> )                                                                     | Terminal: 2041(m), 1988(s), 1963(s), 1947(s), 1927(s), 1898(s)<br>Bridging: 1850(s), 1817(s), 1797(s)                                                  |
| <sup>b</sup> [Fe <sub>5</sub> ( $\mu_5$ -C)(CO) <sub>14</sub> (PMePh <sub>2</sub> )]                                                                                                 | Terminal: 2080(w), 2035(vs), 2026(s), 2010(m)                                                                                                          |
| <sup>b</sup> [Fe <sub>5</sub> ( $\mu_5$ -C)(CO) <sub>13</sub> (PMePh <sub>2</sub> ) <sub>2</sub> ]                                                                                   | Terminal: 2061(w), 2031(vs), 2000(m)                                                                                                                   |
| <sup>b</sup> [Fe <sub>5</sub> ( $\mu_5$ -C)(CO) <sub>12</sub> (PMePh <sub>2</sub> ) <sub>3</sub> ]                                                                                   | Terminal: 2042(m), 2001(s), 1989(s)                                                                                                                    |
| [Fe <sub>3</sub> ( $\mu_3$ -CH)(CO) <sub>10</sub> ][Fe(MeCN) <sub>2</sub> (bdpb) <sub>2</sub> ] ( <b>6</b> )                                                                         | Terminal: 2051(w), 1977(s), 1949(s), 1901(s)<br>Bridging: 1725(m)                                                                                      |
| [Fe <sub>3</sub> { $\mu_3$ -C-P(Ph <sub>2</sub> )C <sub>2</sub> H <sub>4</sub> (PhP)C <sub>2</sub> H <sub>4</sub> (PPh <sub>2</sub> )}(CO) <sub>7</sub> ( $\mu_2$ -CO)] ( <b>7</b> ) | Terminal: 2061(w), 1963(s)<br>Bridging: 1881(s)                                                                                                        |
| [Fe <sub>5</sub> ( $\mu_5$ -C)(CO) <sub>14</sub> (Triphos)] ( <b>8</b> )                                                                                                             | Terminal: 2078(m), 2011(s), 1995(s), 1966(s), 1949(s), 1932(s)                                                                                         |
| <sup>c</sup> [Fe <sub>4</sub> ( $\mu_4$ -C)( $\mu_2$ -CO)(CO) <sub>12</sub> ] in cyclohexane                                                                                         | 2062(s) 2051(s), 2040(s), 2035(s), 2015(w), 2000(w), 1990(m), 1901(m)                                                                                  |
| <sup>d</sup> [Fe <sub>4</sub> ( $\mu_4$ -C)(CO) <sub>12</sub> ] <sup>2-</sup> in MeCN                                                                                                | Terminal: 1969(s), 1945(s)                                                                                                                             |
| [Fe <sub>4</sub> ( $\mu_4$ -C)( $\mu_2$ -CO) <sub>2</sub> (CO) <sub>8</sub> ( $\kappa_3$ -Triphos)] ( <b>9</b> )                                                                     | Terminal: 2059(m), 2045(m), 2002(s), 1971(s), 1944(s), 1918(s)<br>Bridging: 1884(m) and 1799(m)                                                        |
| [Fe <sub>3</sub> (CO) <sub>8</sub> ( $\mu_3$ -CO)( $\mu_3$ -aceto- $\kappa_2$ -O)Fe(CO)( $\kappa_3$ -Triphos)] ( <b>10</b> ) dropcast from THF                                       | Terminal: 2059(w), 2000(s), 1973(s)<br>Bridging: 1772(w)<br>aceto $\nu(\text{C=O})$ : 1670(w)                                                          |
| [Fe <sub>3</sub> ( $\mu_3$ -CPh){Triphos(PPh <sub>2</sub> ) <sub>2</sub> (PPh)}(CO) <sub>7</sub> ] ( <b>11</b> )                                                                     | Terminal: 2048(s), 2000(s), 1963(s), 1936(m), 1918(s)<br>Bridging: 1854(s)                                                                             |

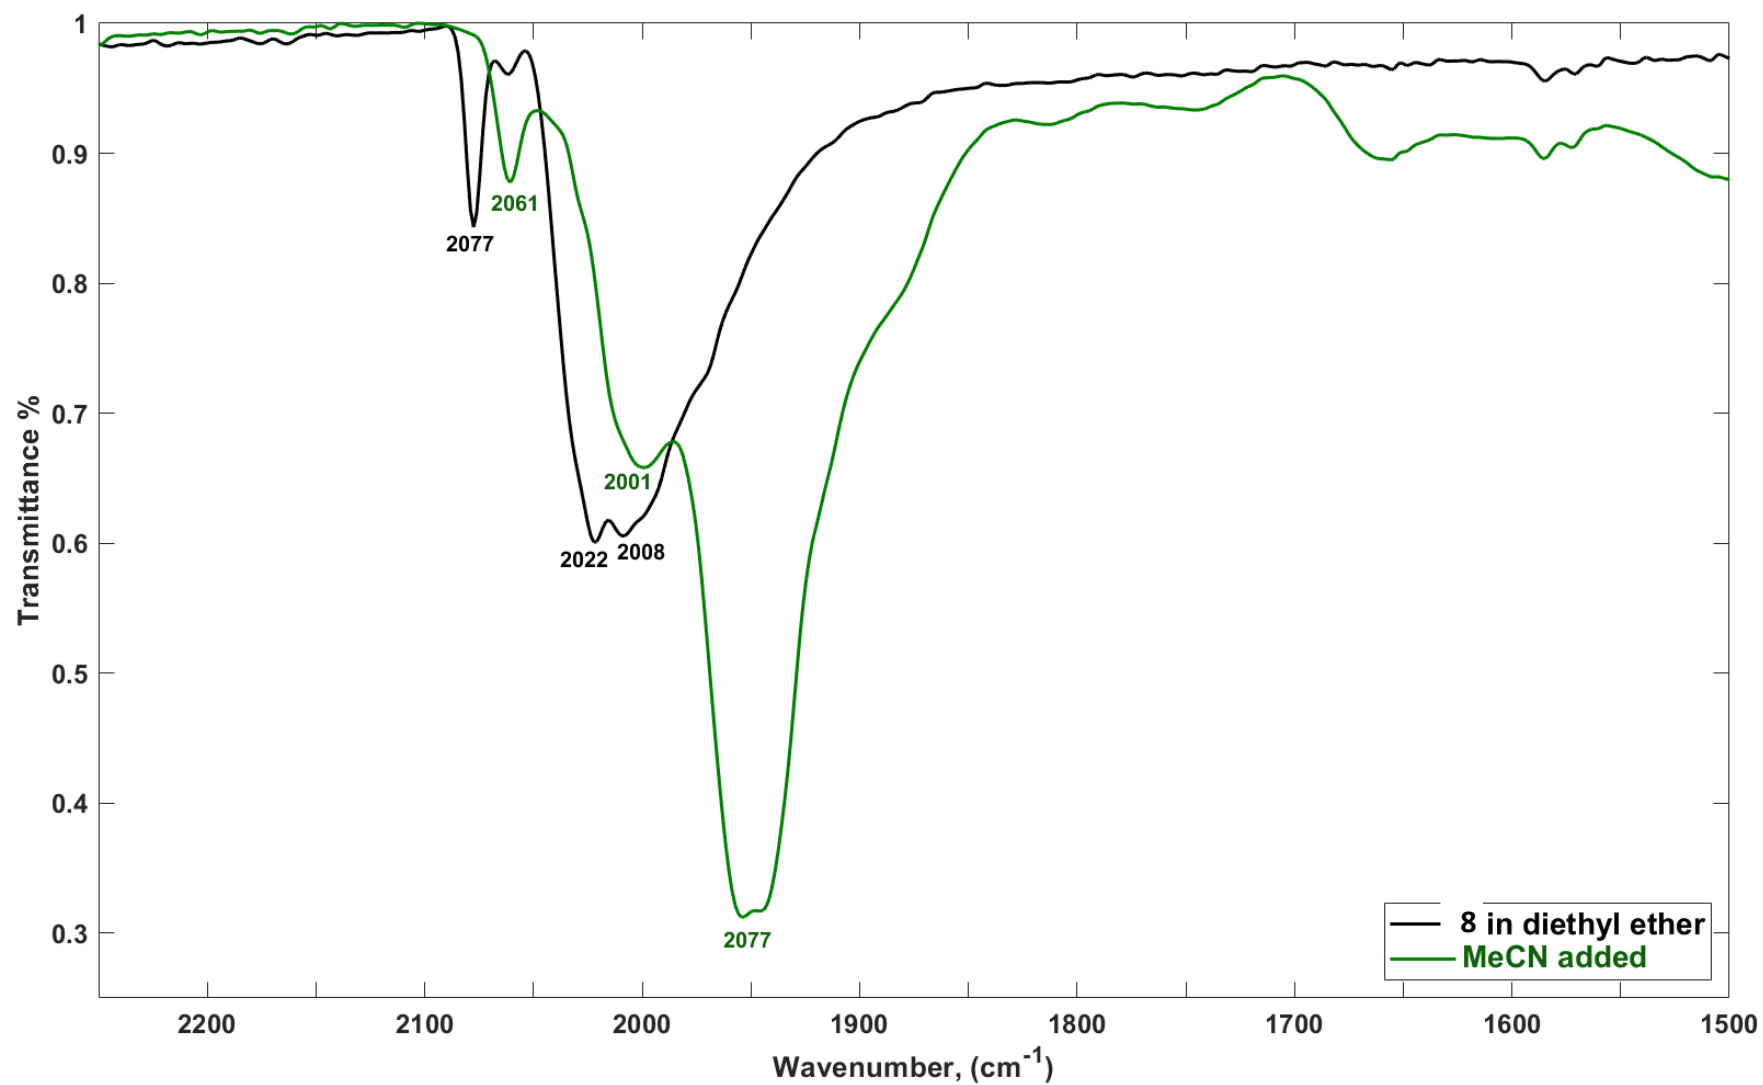

**Figure S36.** Dropcast FT-IR spectra in the  $\nu(\text{CO})$  region for **8** in  $\text{Et}_2\text{O}$ , and of the reaction mixture of **8** with MeCN.

## X-ray Diffraction and Crystal Structure of Compounds 3—11

Details of crystal data, data collection, and structure refinement are listed in **Table S2-S4**. All figures were generated using Mercury for Windows.<sup>7</sup>

### X-ray Diffraction and Crystal Structure Solution of (3) Experimental Details

Dark black plate crystals of compound **3** were grown by slow evaporation of a fluorobenzene solution at  $-20\text{ }^{\circ}\text{C}$  under nitrogen atmosphere. The data crystal had the approximate dimensions  $0.15 \times 0.11 \times 0.07\text{ mm}^3$ .

The data were collected on an XtaLAB Synergy Single source home/near using a  $\mu$ -focus sealed X-ray tube PhotonJet (Cu)  $K\alpha$  radiation source ( $\lambda = 1.54184\text{ \AA}$ ) with collimating mirror monochromators and a Rigaku Oxford Diffraction HyPix 6000E Hybrid Pixel Array Detector. A total of 1796 frames of data were collected using  $\omega$ -scans with a scan width of  $0.5^{\circ}$  at a detector distance of 33.00 mm and beam slit was set to 10.0 mR divergence at 100 percent intensity.

Scans were collected with an exposure time of 0.400 seconds per frame and with an exposure time of 1.440 seconds per frame. The data were collected at an average temperature of 100.0(5) K (min 99.5, max 100.6) using an OxfordCryosystems Cryostream Controller 700 low temperature device.

Data reduction was performed using CrysAlisPro 1.171.42.72a with a per-frame model refinement, 2-cycle 3D peak analysis, and 3D profile fitting used.<sup>8</sup> A CrysAlisPro diffraction orientation matrix type was used.<sup>9</sup> A multi-scan empirical absorption correction using spherical harmonics, implemented in SCALE3 ABSPACK scaling algorithm were applied.

Using Olex2 1.5<sup>10</sup>, the structure was solved with the SHELXT<sup>11</sup> structure solution program using Intrinsic Phasing and refined by full-matrix least-squares on  $F^2$  with anisotropic displacement parameters for the non-H atoms using the SHELXL<sup>12</sup> refinement package using Least Squares minimization. Hydrogens were calculated isotropically in ideal positions. The function  $\sum w(|F_o^2| + |F_c^2|)^2$  was minimized  $w = \frac{1}{[(\sum(F_o^2)) + (0.0722P)^2 + 2.9775P]}$  where  $P = \frac{(|F_o^2| + |F_c^2|)}{3}$ .  $wR(F^2)$  refined to 0.0345, with  $R(F)$  equal to 0.0867 and a goodness of fit on  $F^2$ ,  $S = 1.060$ . Definitions used for  $wR(F^2)$ ,  $R(F)$ , and a goodness of fit on  $F^2$ ,  $S$ , are given in reference 14. Weighting factors were calculated with Olex2 1.5 as 0.0436, 3.4306. Neutral atom scattering factors and values used to calculate the linear absorption coefficient are from the International Tables for X-ray Crystallography.<sup>13</sup>

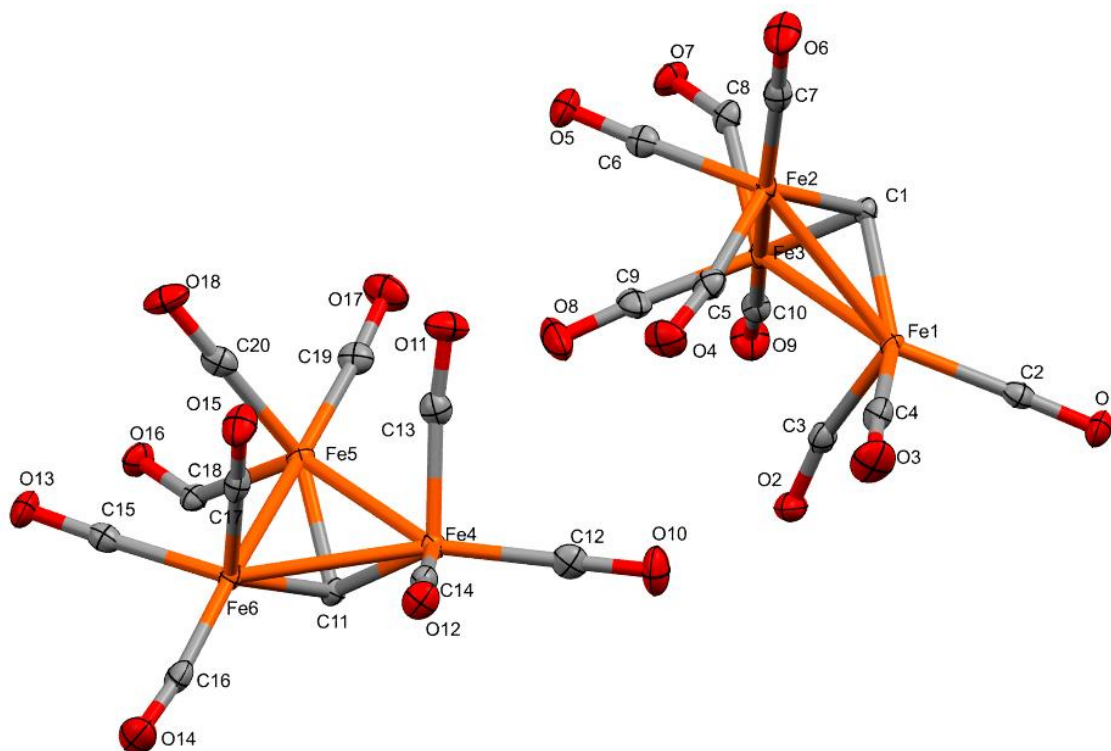

**Figure S37.** Full thermal ellipsoid plot (50% probability) of  $[\text{Fe}_6(\mu_6\text{-C})(\text{CO})_{17}]$  (**3**) with hydrogen atoms omitted for clarity.

### X-ray Diffraction and Crystal Structure Solution of (**4**) Experimental Details

Dark black plate crystals of compound **4** were grown by slow evaporation of a diethyl ether solution at  $-20\text{ }^{\circ}\text{C}$  under nitrogen atmosphere. The data crystal had the approximate dimensions  $0.32 \times 0.26 \times 0.055\text{ mm}^3$ .

The data were collected on an XtaLAB Synergy Single source home/near using a  $\mu$ -focus sealed X-ray tube PhotonJet (Cu)  $\text{K}\alpha$  radiation source ( $\lambda = 1.54184\text{ \AA}$ ) with collimating mirror monochromators and a Rigaku Oxford Diffraction HyPix 6000E Hybrid Pixel Array Detector. A total of 5206 frames of data were collected using  $\omega$ -scans with a scan width of  $0.5^{\circ}$  at a detector distance of 33.00 mm and beam slit was set to 10.0 mR divergence at 100 percent intensity. Scans were collected with an exposure time of 4 seconds per frame for frames collected with a detector offset of  $\pm 48.294^{\circ}$ , and scans were collected with an exposure time of 12 seconds per frame with frames collected with a detector offset of  $\pm 104.518^{\circ}$ . The data were collected at an average temperature of  $100.0(5)\text{ K}$  (min 99.5, max 100.6) using an OxfordCryosystems Cryostream Controller 700 low temperature device.

Data reduction was performed using CrysAlisPro 1.171.42.72a with a per-frame model refinement, 2-cycle 3D peak analysis, and 3D profile fitting used.<sup>8</sup> A CrysAlisPro diffraction orientation matrix type was used.<sup>9</sup> A multi-scan empirical absorption correction using spherical harmonics, implemented in SCALE3 ABSPACK scaling algorithm were applied.

Using Olex2 1.5<sup>10</sup>, the structure was solved with the SHELXT<sup>11</sup> structure solution program using Intrinsic Phasing and refined by full-matrix least-squares on  $F^2$  with anisotropic displacement parameters for the non-H atoms using the SHELXL<sup>12</sup> refinement package using Least Squares minimization. Hydrogens were calculated isotropically in ideal positions. Absolute structure flack parameter was determined using 2763 quotients and found as 0.014(5).<sup>14</sup>

The function  $\sum w(|F_o|^2 + |F_c|^2)^2$  was minimized  $w = \frac{1}{[(\sum(F_o^2)) + (0.0722P)^2 + 2.9775P]}$  where  $P = \frac{(|F_o|^2 + |F_c|^2)}{3}$ .  $wR(F^2)$  refined to 0.0910, with  $R(F)$  equal to 0.0345 and a goodness of fit on  $F^2$ ,  $S = 1.059$ . Definitions used for  $wR(F^2)$ ,  $R(F)$ , and a goodness of fit on  $F^2$ ,  $S$ , are given in reference 14. The data were checked for secondary extinction effects, but no correction was necessary. Neutral atom scattering factors and values used to calculate the linear absorption coefficient are from the International Tables for X-ray Crystallography.<sup>13</sup>

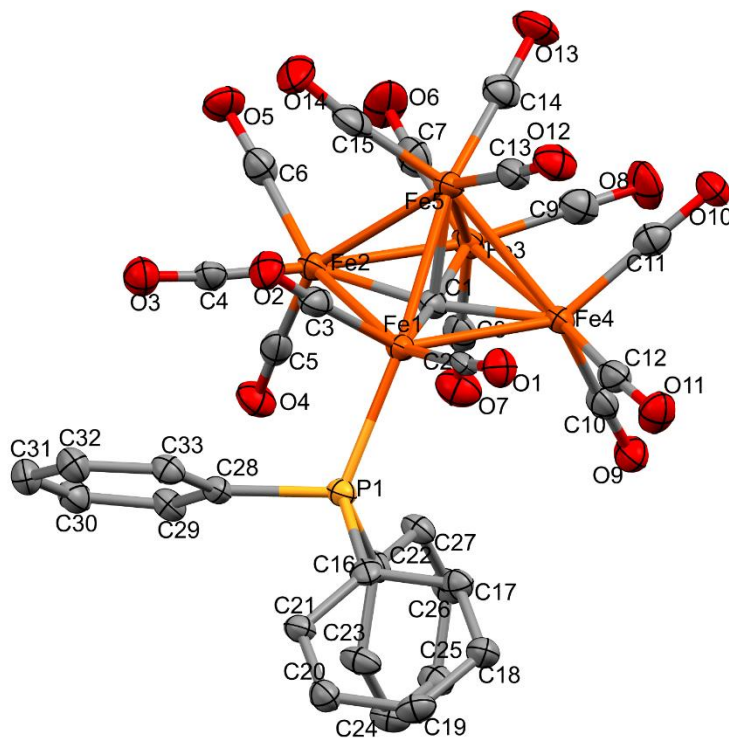

**Figure S38.** Full thermal ellipsoid plot (50% probability) of  $[\text{Fe}_5(\mu_5\text{-C})(\text{CO})_{14}\text{PPh}_3]$  (**4**) with hydrogen atoms omitted for clarity.

## X-ray Diffraction and Crystal Structure Solution of (5) Experimental Details

Crystals of **5** were grown as dark red plates from a vapor diffusion of diethyl ether into fluorobenzene. The data crystal had the approximate dimensions:  $0.12 \times 0.06 \times 0.03$  mm.

The data were collected on an XtaLAB Synergy Single source home/near using a  $\mu$ -focus sealed X-ray tube PhotonJet (Cu)  $K\alpha$  radiation source ( $\lambda = 1.54184$  Å) with collimating mirror monochromators and a Rigaku Oxford Diffraction HyPix 6000E Hybrid Pixel Array Detector. A total of 2814 frames of data were collected using  $\omega$ -scans with a scan width of  $0.5^\circ$  at a detector distance of 33.00 mm and beam slit was set to 10.0 mR divergence at 100 percent intensity. Scans were collected with an exposure time of 0.44 seconds per frame for frames collected with a detector offset of  $\pm 48.294^\circ$ , and scans were collected with an exposure time of 1.74 seconds per frame with frames collected with a detector offset of  $\pm 104.518^\circ$ . The data were collected at an average temperature of 100.0(5) K (min 99.8, max 100.2) using an OxfordCryosystems Cryostream Controller 700 low temperature device.

Data reduction was performed using CrysAlisPro 1.171.42.72a with a per-frame model refinement, 2-cycle 3D peak analysis, and 3D profile fitting used.<sup>8</sup> A CrysAlisPro diffraction orientation matrix type was used.<sup>9</sup> A numerical absorption correction based on gaussian integration over a multifaceted crystal model with a multi-scan empirical absorption correction using spherical harmonics, implemented in SCALE3 ABSPACK scaling algorithm were applied.

Using Olex2 1.5<sup>10</sup>, the structure was solved with the SHELXT<sup>11</sup> structure solution program using Intrinsic Phasing and refined by full-matrix least-squares on  $F^2$  with anisotropic displacement parameters for the non-H atoms using the SHELXL<sup>12</sup> refinement package using Least Squares minimization. Hydrogens were refined with isotropic displacement parameters. The hydrogen atom bridging Fe1 and Fe2 was observed in a difference electron density map and refined with an isotropic displacement parameter. The function  $\sum w(|F_o^2| + |F_c^2|)^2$  was minimized  $w = \frac{1}{[(\sum(F_o^2)) + (0.0947P)^2 + 2.0813P]}$  where  $P = \frac{(|F_o^2| + |F_c^2|)}{3}$ .  $wR(F^2)$  refined to 0.1375, with  $R(F)$  equal to 0.0459 and a goodness of fit on  $F^2$ ,  $S = 1.137$ . Definitions used for  $wR(F^2)$ ,  $R(F)$ , and the goodness of fit on  $F^2$ ,  $S$ , are given in reference 14. The data were checked for secondary extinction effects, but no correction was necessary. Neutral atom scattering factors and values used to calculate the linear absorption coefficient are from the International Tables for X-ray Crystallography.<sup>13</sup>

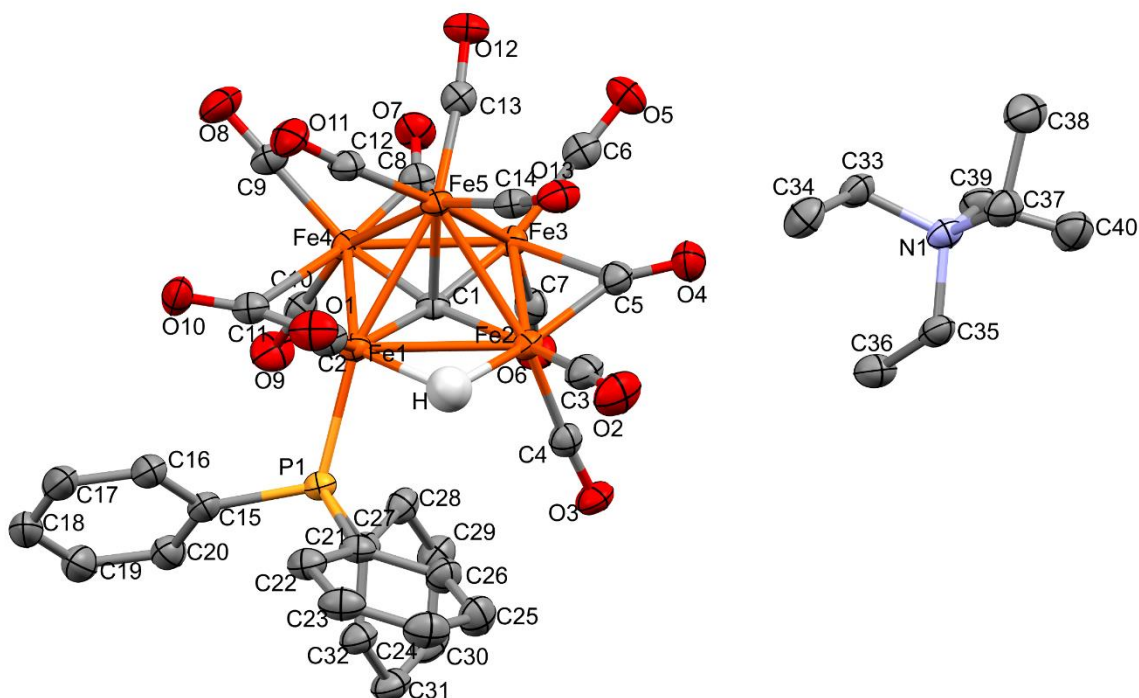

**Figure S39.** Full thermal ellipsoid plot (50% probability) of  $\text{NEt}_4[\text{Fe}_5(\mu_5\text{-C})(\mu_2\text{-H})(\text{CO})_{13}\text{PPh}_3]$  (5) with hydrogen atoms omitted for clarity, except the hydride H.

### X-ray Diffraction and Crystal Structure Solution of (6) Experimental Details

Compound **6** was purified by fractional crystallization of unreacted phosphine impurities by slow evaporation from diethyl ether at  $-20^\circ\text{C}$ . Crystals of **6** were grown as bright red prisms by vapor diffusion of pentane into a saturated solution in diethyl ether at room temperature under inert atmosphere. The data crystal had the approximate dimensions:  $0.243 \times 0.110 \times 0.090 \text{ mm}^3$ .

The data were collected on an Agilent Technologies SuperNova Dual Source diffractometer using a  $\mu$ -focus sealed X-ray tube SuperNova (Cu)  $\text{K}\alpha$  radiation source ( $\lambda = 1.54184 \text{ \AA}$ ) with collimating mirror monochromators and a Rigaku Oxford Diffraction HyPix 6000E Hybrid Pixel Array Detector. A total of 4452 frames of data were collected using  $\omega$ -scans with a scan width of  $0.5^\circ$  at a detector distance of 34.00 mm and beam slit set to 10.0 mR divergence at 100 percent intensity. Scans were collected with an exposure time of 4.0 seconds per frame for frames collected with a detector offset of  $\pm 48.29^\circ$ , and scans were collected with an exposure time of 16.0 seconds per frame with frames collected with a detector offset of  $\pm 104.52^\circ$ . The data were collected at an average temperature of 100.0(5) K using an OxfordCryosystems Cryostream Controller 700 low temperature device.

Data reduction was performed using CrysAlisPro 1.171.42.72a with a per-frame model refinement, 2-cycle 3D peak analysis, and 3D profile fitting used.<sup>8</sup> A CrysAlisPro diffraction orientation matrix type was used.<sup>9</sup> A multiscan empirical absorption correction using spherical harmonics, implemented in SCALE3 ABSPACK scaling algorithm were applied.

Using Olex2 1.5<sup>10</sup>, the structure was solved with the SHELXT<sup>11</sup> structure solution program using Intrinsic Phasing and refined by full-matrix least-squares on  $F^2$  with anisotropic displacement parameters for the non-H atoms using SHELXL<sup>12</sup> refinement package using Least Squares minimization. Bond distances in a disordered solvent diethyl ether molecule were restrained to 1.5 with  $\sigma = 0.02$  for C2A—C1A and C4A—C3A, 2.4 with  $\sigma = 0.04$  for O1A—C1A, C2A—C3A, and O1A—C4A, and  $1.45 \sigma = 0.02$  for O1A—C2A and O1A—C3A. All esds (except the esd in the dihedral angle between two l.s. planes) were estimated using the full covariance matrix. The cell esds were taken into account individually in the estimation of esds in distances, angles and torsion angles; correlations between esds in cell parameters are only used when they are defined by crystal symmetry. An approximate (isotropic) treatment of cell esds is used for estimating esds involving l.s. planes. Hydrogens were calculated in ideal positions isotropically by mixed methods, see .cif file for details.

The function  $\sum w(|F_o^2| + |F_c^2|)^2$  was minimized  $w = \frac{1}{[(\sum(F_o^2)) + (0.0361P)^2 + 3.7934P]}$  where  $P = \frac{(|F_o^2| + |F_c^2|)}{3}$ .  $wR(F^2)$  refined to 0.0800, with  $R(F)$  equal to 0.0376 and a goodness of fit on  $F^2$ ,  $S$ , = 1.099. Definitions used for  $wR(F^2)$ ,  $R(F)$ , and the a goodness of fit on  $F^2$ ,  $S$ , are given in reference 14. The data were checked for secondary extinction effects, but no correction was necessary. Neutral atom scattering factors and values used to calculate the linear absorption coefficient are from the International Tables for X-ray Crystallography.<sup>13</sup>

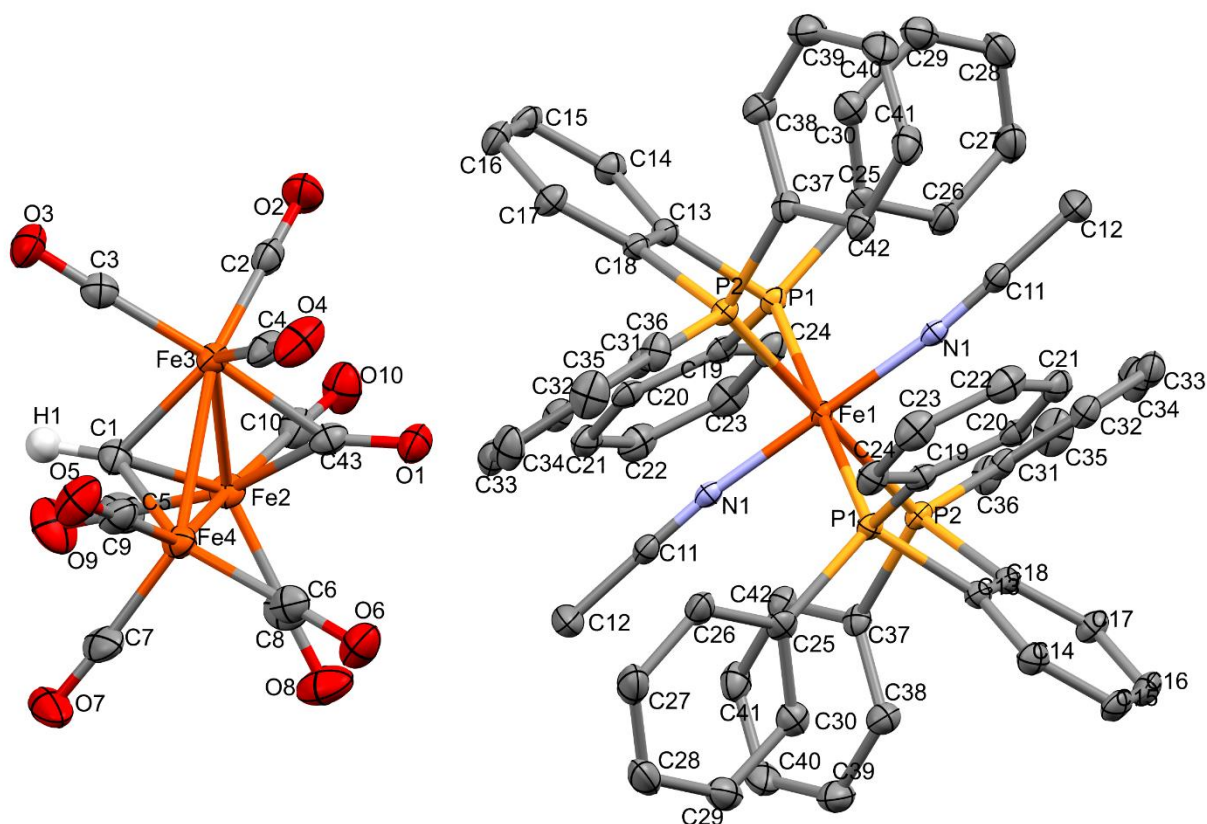

**Figure S40.** Full thermal ellipsoid plot (50% probability) of  $[\text{Fe}_3(\mu_3\text{-CH})(\mu_3\text{-CO})(\text{CO})_9]_2 [(\text{bdpb})_2\text{Fe}(\text{MeCN})_2]$  (**6**) with hydrogen atoms omitted for clarity, except the methyldene hydrogen atom H1. A disordered diethyl ether solvent molecule is omitted for clarity. Shown as a grown structure.

### X-ray Diffraction and Crystal Structure Solution of (**7**) Experimental Details

Crystals of **7** were grown as brown needles by vapor diffusion of pentane into a solution of **7** in toluene at  $-20\text{ }^\circ\text{C}$  under a nitrogen atmosphere. The data crystal had the approximate dimensions:  $0.038 \times 0.054 \times 0.212\text{ mm}^3$ .

The data were collected on an XtaLAB Synergy Single source home/near using a  $\mu$ -focus sealed X-ray tube PhotonJet (Cu)  $\text{K}\alpha$  radiation source ( $\lambda = 1.54184\text{ \AA}$ ) with collimating mirror monochromators and a Rigaku Oxford Diffraction HyPix 6000E Hybrid Pixel Array Detector. A total of 985 frames of data were collected using  $\omega$ -scans with a scan width of  $0.5^\circ$  at a detector distance of 33.00 mm and beam slit was set to 10.0 mR divergence at 100 percent intensity. Scans were collected with an exposure time of 100 seconds per frame for all frames collected (detector offset of  $-55.558^\circ$  and  $+54.308^\circ$ ). The data were collected at an average temperature of 100.02(12) K (min 99.5, max 100.4) using an OxfordCryosystems Cryostream Controller 700 low temperature device. The crystal scattered poorly requiring high scan times, therefore the data collection strategy was set to a lower resolution to make better use of the available instrument time. Data reduction was performed using CrysAlisPro 1.171.42.72a with a per-frame model refinement, 2-cycle 3D peak analysis, and 3D profile fitting used.<sup>8</sup> A CrysAlisPro

diffraction orientation matrix type was used.<sup>9</sup> A multi-scan empirical absorption correction using spherical harmonics, implemented in SCALE3 ABSPACK scaling algorithm were applied.

Using Olex2 1.5<sup>10</sup>, the structure was solved with the SHELXT<sup>11</sup> structure solution program using Intrinsic Phasing and refined by full-matrix least-squares on  $F^2$  with anisotropic displacement parameters for the non-H atoms using the SHELXL<sup>12</sup> refinement package using Least Squares minimization. Hydrogen atoms were not calculated. Three solvent toluene molecules are present, one of which is disordered. The function  $\sum w(|F_o^2| + |F_c^2|)^2$  was minimized  $w = \frac{1}{[(\sum(F_o^2)) + (0.1114P)^2 + 45.3231P]}$  where  $P = \frac{(|F_o^2| + |F_c^2|)}{3}$ .  $wR(F^2)$  refined to 0.2349, with  $R(F)$  equal to 0.0842 and a goodness of fit on  $F^2$ ,  $S$ , = 1.109. Definitions used for  $wR(F^2)$ ,  $R(F)$ , and the a goodness of fit on  $F^2$ ,  $S$ , are given in reference 14. Neutral atom scattering factors and values used to calculate the linear absorption coefficient are from the International Tables for X-ray Crystallography.<sup>13</sup>

Note: The structure of **7** is only satisfactory for determining atom connectivity, and as such no in-depth bond metric analysis is presented. The structure reveals that the linear Triphos stabilizes the Fe cluster via chelation, but the inter-phosphine atom distances appear to favor multiple binding events at a single iron, likely inducing cluster disproportionation and functionalization of the carbide site. Nonetheless, the functionalization of the carbide by P–C coordination from the free linear Triphos arm is notable.

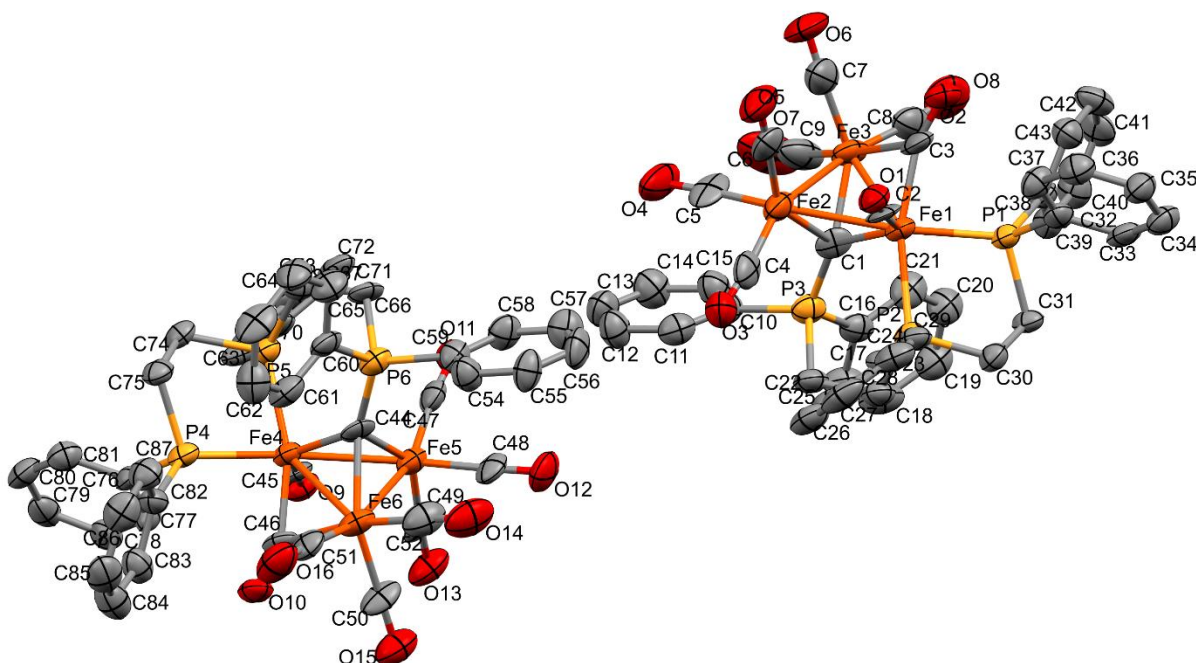

**Figure S41.** Full thermal ellipsoid plot (50% probability) showing the connectivity of  $[\text{Fe}_3\{\mu_3\text{-C-P(Ph}_2\text{)C}_2\text{H}_4\text{(PhP)C}_2\text{H}_4\text{(PPh}_2\text{)}\}]]$  (**7**). H atoms omitted. Three toluene solvent molecules, one disordered, are omitted for clarity.

## X-ray Diffraction and Crystal Structure Solution of **8**) Experimental Details

Small grey-green needle crystals of **8** were grown by slow evaporation from a solution in pentane under a nitrogen atmosphere at  $-20^{\circ}\text{C}$ . The data crystal had the approximate dimensions:  $0.045 \times 0.059 \times 0.136\text{ mm}^3$ .

The data were collected on an XtaLAB Synergy Single source home/near using a  $\mu$ -focus sealed X-ray tube PhotonJet (Cu)  $K\alpha$  radiation source ( $\lambda = 1.54184\text{ \AA}$ ) with collimating mirror monochromators and a Rigaku Oxford Diffraction HyPix 6000E Hybrid Pixel Array Detector. A total of 2732 frames of data were collected using  $\omega$ -scans with a scan width of  $0.5^{\circ}$  at a detector distance of 33.00 mm and beam slit was set to 10.0 mR divergence at 100 percent intensity. Scans were collected with an exposure time of 30 seconds per frame for frames collected with a detector offset of  $\pm 48.570^{\circ}$ , and scans were collected with an exposure time of 40 seconds per frame with frames collected with a detector offset of  $\pm 105.116^{\circ}$ . The data were collected at an average temperature of 100.02(12) K (min 99.5, max 100.4) using an OxfordCryosystems Cryostream Controller 700 low temperature device. The data crystal scattered poorly. Data collection was stopped to make better use of the instrument time. A resolution cutoff of 1.0 angstrom was applied to the data.

Data reduction was performed using CrysAlisPro 1.171.42.72a with a per-frame model refinement, 2-cycle 3D peak analysis, and 3D profile fitting used.<sup>8</sup> Reflections were merged by SHELXL according to the crystal class for the calculation of statistics and refinement. Structure factors included contributions from the .fab file. A CrysAlisPro diffraction orientation matrix type was used.<sup>9</sup> A numerical absorption correction based on gaussian integration over a multifaceted crystal model with an empirical absorption correction using spherical harmonics, implemented in SCALE3 ABSPACK scaling algorithm were applied.

Using Olex2 1.5<sup>10</sup>, the structure was solved with the SHELXT<sup>11</sup> structure solution program using Intrinsic Phasing and refined by full-matrix least-squares on  $F^2$  with anisotropic displacement parameters for the non-H atoms using the SHELXL<sup>12</sup> refinement package using Least Squares minimization. Hydrogens were calculated in ideal position with fixed  $U_{\text{iso}}$  set to 1.2 times for all C(H) groups and all C(H,H) groups, and to 1.5 times for all (C(H,H,H)) groups. An idealized Methyl was refined as rotating group: C19(H19A, H19B, H19C). The function  $\sum w(|F_o^2| + |F_c^2|)^2$  was minimized  $w = \frac{1}{[(\sum(F_o^2)) + (0.1046P)^2 + 4.8603P]}$  where  $P = \frac{(|F_o^2| + |F_c^2|)}{3}$ .  $wR(F^2)$  refined to 0.1826, with  $R(F)$  equal to 0.1983 and a goodness of fit on  $F^2$ ,  $S$ , = 1.066. Definitions used for  $wR(F^2)$ ,  $R(F)$ , and the a goodness of fit on  $F^2$ ,  $S$ , are given in reference 14. The data were checked for secondary extinction effects, but no correction was necessary. Neutral atom scattering factors and values used to calculate the linear absorption coefficient are from the International Tables for X-ray Crystallography.<sup>13</sup> A molecule of n-pentane was disordered. The molecule could not be adequately modeled. Its contribution to the scattering factors was removed using ByPass as utilized in Olex2 1.5<sup>10</sup>.

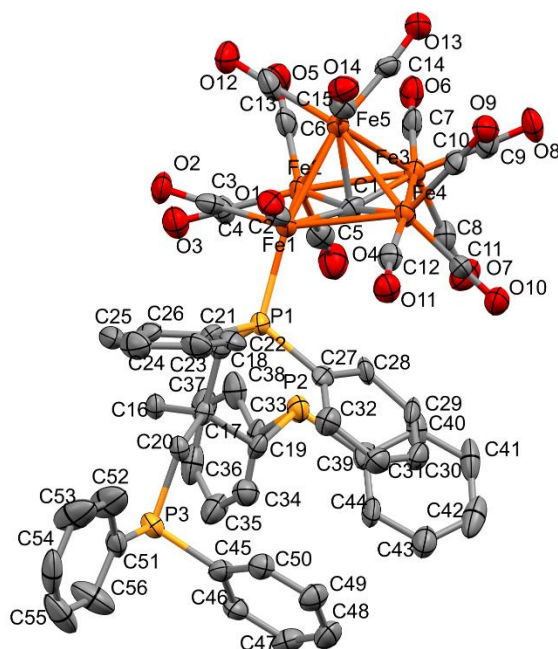

**Figure S42.** Full thermal ellipsoid plot (50% probability) of  $[\text{Fe}_5(\mu_5\text{-C})(\kappa_1\text{-Triphos})(\text{CO})_{14}]$  (**8**) with hydrogen atoms omitted for clarity.

#### X-ray Diffraction and Crystal Structure Solution of (**9**) Experimental Details

Small, metallic, greenish black block crystals of **9** were grown by slow evaporation from a solution in diethyl ether at room temperature under a nitrogen atmosphere. The data crystal had the approximate dimensions:  $0.141 \times 0.227 \times 0.426 \text{ mm}^3$ .

The data were collected on an Agilent Technologies SuperNova Dual Source diffractometer using a  $\mu$ -focus sealed X-ray tube SuperNova (Cu)  $K\alpha$  radiation source ( $\lambda = 1.54184 \text{ \AA}$ ) with collimating mirror monochromators and a CCD plate AtlasS2 Detector. A total of 1053 frames of data were collected using  $\omega$ -scans with a scan width of  $1.0^\circ$  at a detector distance of 54.00 mm. Scans were collected with an exposure time of 30.0 seconds per frame for frames collected with a detector offset of  $\pm 39.84^\circ$ , and scans were collected with an exposure time of 37.5 seconds per frame with frames collected with a detector offset of  $\pm 107.09^\circ$ . The data were collected at an average temperature of 100.02(12) K (min 99.9, max 100.1) using an OxfordCryosystems Cryostream Controller 700 low temperature device.

Data reduction was performed using CrysAlisPro 1.171.42.72a with 3D profile fitting used.<sup>8</sup> A CrysAlisPro diffraction orientation matrix type was used.<sup>9</sup> A multiscan empirical absorption correction using spherical harmonics, implemented in SCALE3 ABSPACK scaling algorithm were applied.

Using Olex2 1.5<sup>10</sup>, the structure was solved with the SHELXT<sup>11</sup> structure solution program using Intrinsic Phasing and refined by full-matrix least-squares on  $F^2$  with anisotropic displacement parameters for the non-H atoms using the SHELXL<sup>12</sup> refinement package using Least Squares minimization. Hydrogens were calculated in ideal position with fixed  $U_{iso}$  set to 1.2 times for all C(H) groups and all C(H,H) groups, and to 1.5 times for all (C(H,H,H)) groups (methyl hydrogens.) The function  $\sum w(|F_o^2| + |F_c^2|)^2$  was minimized  $w = \frac{1}{[(\sum(F_o^2)) + (0.1259P)^2 + 13.9167P]}$  where  $P = \frac{(|F_o^2| + |F_c^2|)}{3}$ .  $wR(F^2)$  refined to 0.0804, with  $R(F)$  equal to 0.02005 and a goodness of fit on  $F^2$ ,  $S$ , = 1.027. Definitions used for  $wR(F^2)$ ,  $R(F)$ , and the a goodness of fit on  $F^2$ ,  $S$ , are given in reference 14. The data were checked for secondary extinction effects, but no correction was necessary. Neutral atom scattering factors and values used to calculate the linear absorption coefficient are from the International Tables for X-ray Crystallography.<sup>13</sup> A toluene solvent molecule is disordered around a crystallographic inversion center.

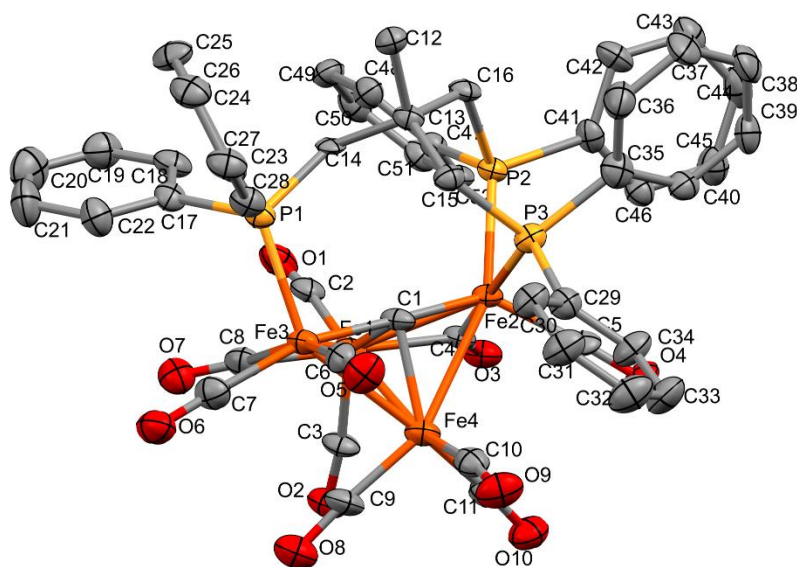

**Figure S43.** Full thermal ellipsoid plot (50% probability) of  $[\text{Fe}_4(\mu_4\text{-C})(\kappa_3\text{-Triphos})(\text{CO})_{10}]$  (**9**) with hydrogen atoms omitted for clarity.

#### X-ray Diffraction and Crystal Structure Solution of (**10**) Experimental Details

Large, clear dark red needle crystals of **10** were grown by vapor diffusion of pentane into toluene at room temperature under nitrogen atmosphere. The sample crystal was cut to a smaller data crystal of the approximate dimensions:  $0.141 \times 0.227 \times 0.426 \text{ mm}^3$ .

The data were collected on an Agilent Technologies SuperNova Dual Source diffractometer using a  $\mu$ -focus sealed X-ray tube SuperNova (Cu)  $K\alpha$  radiation source ( $\lambda = 1.54184 \text{ \AA}$ ) with collimating mirror monochromators and a

Rigaku Oxford Diffraction HyPix 6000E Hybrid Pixel Array Detector. A total of 5414 frames of data were collected using  $\omega$ -scans with a scan width of  $0.5^\circ$  at a detector distance of 34.00 mm and beam slit was set to 10.0 mR divergence at 100 percent intensity. Scans were collected with an exposure time of 1.3 seconds per frame for frames collected with a detector offset of  $\pm 48.449^\circ$ , and scans were collected with an exposure time of 5.2 seconds per frame with frames collected with a detector offset of  $\pm 107.750^\circ$ . The data were collected at an average temperature of 100.0(4) K (min 99.9, max 100.1) using an OxfordCryosystems Cryostream Controller 700 low temperature device.

Data reduction was performed using CrysAlisPro 1.171.42.72a with a per-frame model refinement, 2-cycle 3D peak analysis, and 3D profile fitting used.<sup>8</sup> A CrysAlisPro diffraction orientation matrix type was used.<sup>9</sup> A multiscan empirical absorption correction using spherical harmonics, implemented in SCALE3 ABSPACK scaling algorithm were applied.

Using Olex2 1.5<sup>10</sup>, the structure was solved with the SHELXT<sup>11</sup> structure solution program using Intrinsic Phasing and refined by full-matrix least-squares on  $F^2$  with anisotropic displacement parameters for the non-H atoms using SHELXL<sup>12</sup> refinement package using Least Squares minimization. A CO and MeCN both partially occupy a coordination site (CO: 0.578, MeCN: 0.422) to Fe1. Restrained distances for the CO bond C54-O13 and the nitrile bond N1-C55 were set to 1.14 with  $\sigma = 0.01$ . Restrained distance for the MeCN C55-C56 was set to 1.45 with  $\sigma = 0.01$ . The C-C bonds of a disordered toluene solvent molecule were also restrained (see cif for details). Hydrogens were calculated in ideal positions isotropically. The function  $\sum w(|F_o^2| + |F_c^2|)^2$  was minimized  $w = \frac{1}{[(\sum(F_o^2)) + (0.0455P)^2 + 1.6688P]}$  where  $P = \frac{(|F_o^2| + |F_c^2|)}{3}$ .  $wR(F^2)$  refined to 0.0912, with  $R(F)$  equal to 0.0382 and a goodness of fit on  $F^2$ ,  $S$ , = 1.060. Definitions used for  $wR(F^2)$ ,  $R(F)$ , and the a goodness of fit on  $F^2$ ,  $S$ , are given in reference 14. The data were checked for secondary extinction effects, but no correction was necessary. Neutral atom scattering factors and values used to calculate the linear absorption coefficient are from the International Tables for X-ray Crystallography.<sup>13</sup> A toluene solvent molecule is disordered around a crystallographic inversion center.

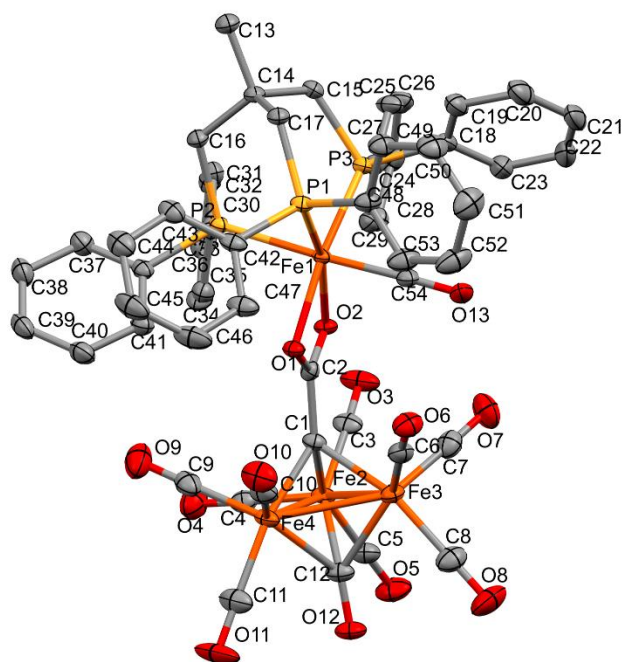

**Figure S44.** Full thermal ellipsoid plot (50% probability) of  $[\text{Fe}_3(\text{CO})_8(\mu_3\text{-CO})(\mu_3\text{-aceto-}\kappa_2\text{-O})\text{Fe}(\text{CO})(\kappa_3\text{-Triphos})]$  (**10**) with hydrogen atoms omitted for clarity. A disordered toluene molecule is omitted for clarity.

#### X-ray Diffraction and Crystal Structure Solution of (**11**) Experimental Details

Crystals **11** were grown as dichromic green and yellow (appearing brown when large enough to be opaque) prisms by cooling a solution of **9** in toluene to  $-20\text{ }^\circ\text{C}$  for over two months. The data crystal had the approximate dimensions:  $0.223 \times 0.103 \times 0.049\text{ mm}^3$ .

The data were collected on an XtaLAB Synergy Single source home/near using a  $\mu$ -focus sealed X-ray tube PhotonJet (Cu)  $K\alpha$  radiation source ( $\lambda = 1.54184\text{ \AA}$ ) with collimating mirror monochromators and a Rigaku Oxford Diffraction HyPix 6000E Hybrid Pixel Array Detector. A total of 5210 frames of data were collected using  $\omega$ -scans with a scan width of  $0.5^\circ$  at a detector distance of 33.00 mm and beam slit was set to 10.0 mR divergence at 100 percent intensity. Scans were collected with an exposure time of 5 seconds per frame for frames collected with a detector offset of  $\pm 48.294^\circ$ , and scans were collected with an exposure time of 12 seconds per frame with frames collected with a detector offset of  $\pm 104.518^\circ$ . The data were collected at an average temperature of  $100.0(4)\text{ K}$  (min 99.7, max 100.3) using an OxfordCryosystems Cryostream Controller 700 low temperature device.

Data reduction was performed using CrysAlisPro 1.171.42.72a with a per-frame model refinement, 2-cycle 3D peak analysis, and 3D profile fitting used.<sup>8</sup> A CrysAlisPro diffraction orientation matrix type was used.<sup>9</sup> A numerical absorption correction based on gaussian integration over a multifaceted crystal model with an empirical absorption correction using spherical harmonics, implemented in SCALE3 ABSPACK scaling algorithm were applied.

Using Olex2 1.5<sup>10</sup>, the structure was solved with the SHELXT<sup>11</sup> structure solution program using Intrinsic Phasing and refined by full-matrix least-squares on  $F^2$  with anisotropic displacement parameters for the non-H atoms using the SHELXL<sup>12</sup> refinement package using Least Squares minimization. There is a disordered toluene molecule residing around an inversion center. Hydrogens were calculated in ideal position with fixed  $U_{iso}$  set to 1.2 times for all C(H) groups and all C(H,H) groups, and to 1.5 times for all (C(H,H,H)) groups (methyl hydrogens.) The function  $\sum w(|F_o|^2 + |F_c|^2)^2$  was minimized  $w = \frac{1}{[(\Sigma(F_o^2)) + (0.0349P)^2 + 3.5472P]}$  where  $P = \frac{(|F_o|^2 + |F_c|^2)}{3}$ .  $wR(F^2)$  refined to 0.0735, with  $R(F)$  equal to 0.0288 and a goodness of fit on  $F^2$ ,  $S$ , = 1.072. Definitions used for  $wR(F^2)$ ,  $R(F)$ , and the a goodness of fit on  $F^2$ ,  $S$ , are given in reference 14.<sup>15</sup> The data were checked for secondary extinction effects, but no correction was necessary. Neutral atom scattering factors and values used to calculate the linear absorption coefficient are from the International Tables for X-ray Crystallography.<sup>13</sup> A toluene solvent molecule is disordered around a crystallographic inversion center.

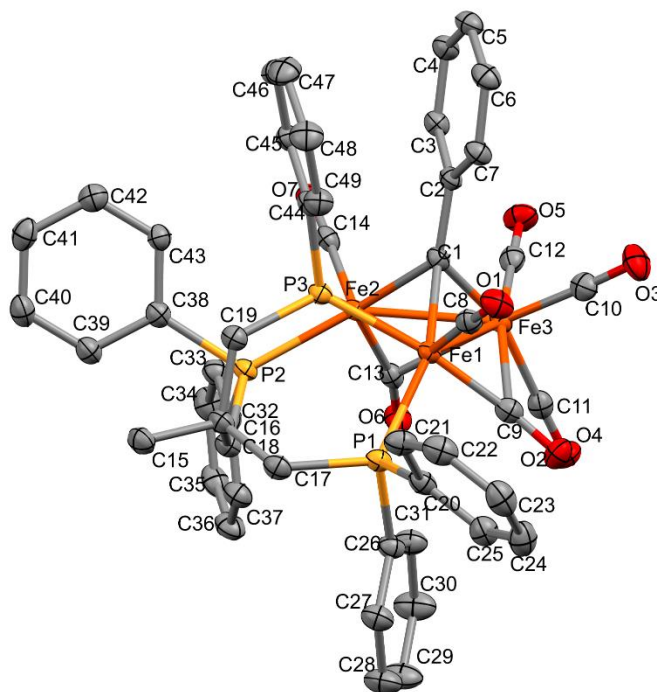

**Figure S45.** Full thermal ellipsoid plot (50% probability) of  $[\text{Fe}_3(\mu_3\text{-CPh})\{\text{Triphos}(\text{PPh}_2)_2(\text{PPh})\}(\text{CO})_7]$  (**11**). One disordered toluene molecule and H atoms are omitted for clarity.

**Table S2.** Summary of Crystal Data Intensity collection and structural refinement parameters for  $\text{Fe}_6\text{C}(\text{CO})_{17}$  (**3**).

|                                                           | <b>3</b>                                                    |
|-----------------------------------------------------------|-------------------------------------------------------------|
| <b>Empirical formula</b>                                  | $\text{C}_{36}\text{Fe}_{12}\text{O}_{34}$                  |
| <b>FW</b>                                                 | 1646.56                                                     |
| <b>T (K)</b>                                              | 100.15                                                      |
| <b>Crystal system</b>                                     | monoclinic                                                  |
| <b>Space group</b>                                        | P2/c                                                        |
| <b>a (Å)</b>                                              | 16.9478(3)                                                  |
| <b>a (Å)</b>                                              | 8.96230(10)                                                 |
| <b>c (Å)</b>                                              | 17.1515(3)                                                  |
| <b><math>\alpha</math> (°)</b>                            | 90                                                          |
| <b><math>\beta</math> (°)</b>                             | 115.433(2)                                                  |
| <b><math>\gamma</math> (°)</b>                            | 90                                                          |
| <b>Volume (Å<sup>3</sup>)</b>                             | 2352.69(7)                                                  |
| <b>Z</b>                                                  | 2                                                           |
| <b><math>\rho_{\text{calc}}</math> (g/cm<sup>3</sup>)</b> | 2.324                                                       |
| <b><math>\mu</math> (mm<sup>-1</sup>)</b>                 | 29.717                                                      |
| <b>F(000)</b>                                             | 1600.0                                                      |
| <b>Crystal size (mm<sup>3</sup>)</b>                      | $0.15 \times 0.11 \times 0.07$                              |
| <b>Radiation</b>                                          | Cu K $\alpha$ ( $\lambda = 1.54184$ )                       |
| <b>2<math>\Theta</math> range for data collection/°</b>   | 5.774 to 153.618                                            |
| <b>Index ranges</b>                                       | $-21 \leq h \leq 13, -11 \leq k \leq 9, -20 \leq l \leq 21$ |
| <b>Reflections collected</b>                              | 15524                                                       |
| <b>GOF on F<sup>2</sup></b>                               | 1.059                                                       |
| <b>Final R indexes [<math>I \geq 2\sigma(I)</math>]</b>   | $R_1 = 0.0345, wR_2 = 0.0867$                               |
| <b>Final R indexes [all data]</b>                         | $R_1 = 0.0416, wR_2 = 0.0910$                               |

**Table S3.** Summary of Crystal Data Intensity collection and structural refinement parameters for [Fe<sub>5</sub>(μ<sub>5</sub>-C)(CO)<sub>14</sub>(PPh<sub>3</sub>)] (**4**), Et<sub>4</sub>N[Fe<sub>5</sub>(μ<sub>5</sub>-C) (μ<sub>2</sub>-H)(CO)<sub>13</sub>PPh<sub>3</sub>] (**5**), [Fe<sub>3</sub>(μ<sub>3</sub>-CH)(μ<sub>3</sub>-CO)(CO)<sub>9</sub>]<sub>2</sub>[(bdpb)<sub>2</sub>Fe(MeCN)<sub>2</sub>] (**6**), and [Fe<sub>3</sub>{μ<sub>3</sub>-C-P(Ph<sub>2</sub>)C<sub>2</sub>H<sub>4</sub>(PhP)C<sub>2</sub>H<sub>4</sub>(PPh<sub>2</sub>)}] (**7**).

|                                            | <b>4</b>                                                          | <b>5</b>                                                           | <b>6</b>                                                                            | <b>7</b>                                                                        |
|--------------------------------------------|-------------------------------------------------------------------|--------------------------------------------------------------------|-------------------------------------------------------------------------------------|---------------------------------------------------------------------------------|
| <b>Empirical formula</b>                   | C <sub>33</sub> H <sub>15</sub> Fe <sub>5</sub> O <sub>14</sub> P | C <sub>40</sub> H <sub>36</sub> Fe <sub>5</sub> NO <sub>13</sub> P | C <sub>45</sub> H <sub>33</sub> Fe <sub>3.5</sub> NO <sub>10.5</sub> P <sub>2</sub> | C <sub>107</sub> H <sub>90</sub> Fe <sub>6</sub> O <sub>16</sub> P <sub>6</sub> |
| <b>FW</b>                                  | 945.67                                                            | 1048.92                                                            | 1013.14                                                                             | 2152.70                                                                         |
| <b>T (K)</b>                               | 100.0(8)                                                          | 100.0(5)                                                           | 100.15                                                                              | 100.15                                                                          |
| <b>Crystal system</b>                      | monoclinic                                                        | Monoclinic                                                         | monoclinic                                                                          | Triclinic                                                                       |
| <b>Space group</b>                         | Pn                                                                | P2 <sub>1</sub> /c                                                 | P2 <sub>1</sub> /c                                                                  | P-1                                                                             |
| <b>a (Å)</b>                               | 9.5978(2)                                                         | 17.1733(3)                                                         | 12.61041(12)                                                                        | 10.0809(6)                                                                      |
| <b>a (Å)</b>                               | 11.8597(2)                                                        | 12.1213(2)                                                         | 15.93666(13)                                                                        | 20.0100(11)                                                                     |
| <b>c (Å)</b>                               | 14.5875(3)                                                        | 20.6329(3)                                                         | 21.4660(2)                                                                          | 25.3574(12)                                                                     |
| <b>α (°)</b>                               | 90                                                                | 90                                                                 | 90                                                                                  | 101.231(5)                                                                      |
| <b>β (°)</b>                               | 90.663(2)                                                         | 103.2791(16)                                                       | 94.5540(8)                                                                          | 99.701(5)                                                                       |
| <b>γ (°)</b>                               | 90                                                                | 90                                                                 | 90                                                                                  | 104.279(5)                                                                      |
| <b>Volume (Å<sup>3</sup>)</b>              | 1660.34(6)                                                        | 4180.17(13)                                                        | 4300.36(7)                                                                          | 4734.3(5)                                                                       |
| <b>Z</b>                                   | 2                                                                 | 4                                                                  | 4                                                                                   | 2                                                                               |
| <b>ρ<sub>calc</sub> (g/cm<sup>3</sup>)</b> | 1.892                                                             | 1.667                                                              | 1.565                                                                               | 1.510                                                                           |
| <b>μ (mm<sup>-1</sup>)</b>                 | 18.203                                                            | 14.509                                                             | 10.529                                                                              | 8.695                                                                           |
| <b>F(000)</b>                              | 940.0                                                             | 2128.0                                                             | 2060.0                                                                              | 2212.0                                                                          |
| <b>Crystal size (mm<sup>3</sup>)</b>       | 1.145 × 0.688 × 0.149                                             | 0.32 × 0.26 × 0.055                                                | 0.090 × 0.110 × 0.243                                                               | 0.038 × 0.054 × 0.212                                                           |
| <b>Radiation</b>                           | Cu Kα (λ = 1.54184)                                               | Cu Kα (λ = 1.54184)                                                | CuKα (λ = 1.54184)                                                                  | CuKα (λ = 1.54184)                                                              |
| <b>2θ range for data collection/°</b>      | 7.454 to 153.638                                                  | 5.288 to 152.98                                                    | 6.916 to 136.502                                                                    | 9.182 to 103.904                                                                |
| <b>Index ranges</b>                        | -12 ≤ h ≤ 12, -14 ≤ k ≤ 14, -17 ≤ l ≤ 18                          | -21 ≤ h ≤ 21, -15 ≤ k ≤ 14, -22 ≤ l ≤ 25                           | -15 ≤ h ≤ 14, -19 ≤ k ≤ 19, -25 ≤ l ≤ 25                                            | -10 ≤ h ≤ 10, -16 ≤ k ≤ 20, -25 ≤ l ≤ 23                                        |
| <b>Reflections collected</b>               | 29237                                                             | 63765                                                              | 76437                                                                               | 14550                                                                           |
| <b>GOF on F<sup>2</sup></b>                | 1.137                                                             | 1.137                                                              | 1.099                                                                               | 1.109                                                                           |
| <b>Final R indexes [I &gt; 2σ (I)]</b>     | R <sub>1</sub> = 0.0410, wR <sub>2</sub> = 0.1174                 | R <sub>1</sub> = 0.0460, wR <sub>2</sub> = 0.1375                  | R <sub>1</sub> = 0.0376, wR <sub>2</sub> = 0.0800                                   | R <sub>1</sub> = 0.0842, wR <sub>2</sub> = 0.2349                               |
| <b>Final R indexes [all data]</b>          | R <sub>1</sub> = 0.0427, wR <sub>2</sub> = 0.1226                 | R <sub>1</sub> = 0.0484, wR <sub>2</sub> = 0.1401                  | R <sub>1</sub> = 0.0413, wR <sub>2</sub> = 0.0815                                   | R <sub>1</sub> = 0.1148, wR <sub>2</sub> = 0.2546                               |

**Table S4.** Summary of Crystal Data Intensity collection and structural refinement parameters for [Fe<sub>5</sub>(μ<sub>5</sub>-C)(CO)<sub>14</sub>(Triphos)] (**8**), [Fe<sub>4</sub>(μ<sub>4</sub>-C)(μ<sub>2</sub>-CO)<sub>2</sub>(CO)<sub>8</sub>(κ<sub>3</sub>-Triphos)] (**9**), [Fe<sub>3</sub>(CO)<sub>9</sub>(μ<sub>3</sub>-aceto-κ<sub>2</sub>O)Fe(CO)(κ<sub>3</sub>-triphos)] (**10**), [Fe<sub>3</sub>(μ<sub>3</sub>-CPh){Triphos(PPh<sub>2</sub>)<sub>2</sub>(PPh)}(CO)<sub>7</sub>] (**11**).

|                                            | <b>8</b>                                                                       | <b>9</b>                                                                       | <b>10</b>                                                                                                 | <b>11</b>                                                                         |
|--------------------------------------------|--------------------------------------------------------------------------------|--------------------------------------------------------------------------------|-----------------------------------------------------------------------------------------------------------|-----------------------------------------------------------------------------------|
| <b>Empirical formula</b>                   | C <sub>56</sub> H <sub>37</sub> Fe <sub>5</sub> O <sub>14</sub> P <sub>3</sub> | C <sub>52</sub> H <sub>39</sub> Fe <sub>4</sub> O <sub>10</sub> P <sub>3</sub> | C <sub>61.42</sub> H <sub>48.27</sub> Fe <sub>4</sub> N <sub>0.42</sub> O <sub>12.58</sub> P <sub>3</sub> | C <sub>53.5</sub> H <sub>42.5</sub> Fe <sub>3</sub> O <sub>7</sub> P <sub>3</sub> |
| <b>FW</b>                                  | 1306.01                                                                        | 1140.14                                                                        | 1309.78                                                                                                   | 1045.82                                                                           |
| <b>T (K)</b>                               | 100.15                                                                         | 100.02(12)                                                                     | 100.02(12)                                                                                                | 100.0(4)                                                                          |
| <b>Crystal system</b>                      | triclinic                                                                      | Monoclinic                                                                     | triclinic                                                                                                 | monoclinic                                                                        |
| <b>Space group</b>                         | P-1                                                                            | P2 <sub>1</sub> /c                                                             | P-1                                                                                                       | P2 <sub>1</sub> /n                                                                |
| <b>a (Å)</b>                               | 9.4782(8)                                                                      | 10.2347(3)                                                                     | 12.9515(3)                                                                                                | 12.22120(10)                                                                      |
| <b>a (Å)</b>                               | 15.6679(7)                                                                     | 24.9460(6)                                                                     | 13.3229(3)                                                                                                | 19.70640(10)                                                                      |
| <b>c (Å)</b>                               | 18.6940(10)                                                                    | 19.6152(6)                                                                     | 19.7999(3)                                                                                                | 19.6407(2)                                                                        |
| <b>α (°)</b>                               | 85.773(5)                                                                      | 90                                                                             | 107.235(2)                                                                                                | 90                                                                                |
| <b>β (°)</b>                               | 76.692(7)                                                                      | 104.582(3)                                                                     | 91.498(2)                                                                                                 | 98.7080(10)                                                                       |
| <b>γ (°)</b>                               | 89.678(5)                                                                      | 90                                                                             | 117.671(2)                                                                                                | 90                                                                                |
| <b>V (Å<sup>3</sup>)</b>                   | 2694.0(3)                                                                      | 4846.7(2)                                                                      | 2835.23(11)                                                                                               | 4675.66(7)                                                                        |
| <b>Z</b>                                   | 2                                                                              | 4                                                                              | 2                                                                                                         | 4                                                                                 |
| <b>ρ<sub>calc</sub> (g/cm<sup>3</sup>)</b> | 1.610                                                                          | 1.563                                                                          | 1.534                                                                                                     | 1.486                                                                             |
| <b>μ (mm<sup>-1</sup>)</b>                 | 11.949                                                                         | 10.843                                                                         | 9.388                                                                                                     | 8.770                                                                             |
| <b>F(000)</b>                              | 1320.0                                                                         | 2320.0                                                                         | 1339.0                                                                                                    | 2146.0                                                                            |
| <b>Size (mm<sup>3</sup>)</b>               | 0.029 × 0.044 × 0.168                                                          | 0.141 × 0.227 × 0.426                                                          | 0.096 × 0.117 × 0.189                                                                                     | 0.223 × 0.103 × 0.049                                                             |
| <b>Radiation</b>                           | CuKα (λ = 1.54184)                                                             | Cu Kα (λ = 1.54184)                                                            | CuKα (λ = 1.54184)                                                                                        | CuKα (λ = 1.54184)                                                                |
| <b>2θ range /°</b>                         | 5.656 to 100.862                                                               | 5.85 to 147                                                                    | 7.75 to 154.04                                                                                            | 6.39 to 152.928                                                                   |
| <b>Index ranges</b>                        | -9 ≤ h ≤ 8, -14 ≤ k ≤ 15, -17 ≤ l ≤ 18                                         | -12 ≤ h ≤ 12, -29 ≤ k ≤ 30, -24 ≤ l ≤ 15                                       | -16 ≤ h ≤ 14, -16 ≤ k ≤ 16, -25 ≤ l ≤ 24                                                                  | -15 ≤ h ≤ 15, -24 ≤ k ≤ 21, -24 ≤ l ≤ 24                                          |
| <b>N<sub>ref</sub> (all)</b>               | 16464                                                                          | 24734                                                                          | 52147                                                                                                     | 88271                                                                             |
| <b>GOF on F<sup>2</sup></b>                | 1.059                                                                          | 1.044                                                                          | 1.060                                                                                                     | 1.072                                                                             |
| <b>Final R indexes [I ≥ 2σ (I)]</b>        | R <sub>1</sub> = 0.0699, wR <sub>2</sub> = 0.1843                              | R <sub>1</sub> = 0.0804, wR <sub>2</sub> = 0.2005                              | R <sub>1</sub> = 0.0382, wR <sub>2</sub> = 0.0912                                                         | R <sub>1</sub> = 0.0288, wR <sub>2</sub> = 0.0735                                 |
| <b>Final R indexes [all data]</b>          | R <sub>1</sub> = 0.0949, wR <sub>2</sub> = 0.2003                              | R <sub>1</sub> = 0.1209, wR <sub>2</sub> = 0.2307                              | R <sub>1</sub> = 0.0432, wR <sub>2</sub> = 0.0936                                                         | R <sub>1</sub> = 0.0305, wR <sub>2</sub> = 0.0743                                 |

**Table S5.** Bond lengths for Fe<sub>6</sub>C(μ<sub>2</sub>-C)(CO)<sub>16</sub> (**3**). <sup>1</sup><sub>-X,+Y,1/2-Z</sub>; <sup>2</sup><sub>1-X,+Y,3/2-Z</sub>

|                        | Bond ( <b>3</b> )    | Length (Å) |
|------------------------|----------------------|------------|
| Fe-(μ <sub>6</sub> -C) | Fe1–C1               | 1.890(3)   |
|                        | Fe2–C1               | 1.9129(5)  |
|                        | Fe3–C1               | 1.891(3)   |
|                        | Fe4–C11              | 1.899(3)   |
|                        | Fe5–C11              | 1.899(3)   |
|                        | Fe6–C11              | 1.9099(5)  |
| C–O                    | C2–O1                | 1.148(4)   |
|                        | C3–O2                | 1.142(4)   |
|                        | C4–O3                | 1.134(4)   |
|                        | C5–O4                | 1.138(4)   |
|                        | C6–O5                | 1.143(4)   |
|                        | C7–O6                | 1.136(4)   |
|                        | C8–O7                | 1.160(5)   |
|                        | C9–O8                | 1.135(4)   |
|                        | C10–O9               | 1.132(4)   |
|                        | C12–O10              | 1.143(4)   |
|                        | C13–O11              | 1.139(4)   |
|                        | C14–O12              | 1.149(4)   |
|                        | C15–O13              | 1.140(4)   |
|                        | C16–O14              | 1.141(4)   |
|                        | C17–O15              | 1.130(4)   |
|                        | C18–O16              | 1.158(5)   |
|                        | C19–O17              | 1.139(4)   |
|                        | C20–O18              | 1.139(4)   |
| Fe–CO                  | Fe1–C2               | 1.790(3)   |
|                        | Fe1–C3               | 1.814(3)   |
|                        | Fe1–C4               | 1.814(4)   |
|                        | Fe2–C5               | 1.810(3)   |
|                        | Fe2–C6               | 1.972(3)   |
|                        | Fe2–C7               | 1.811(3)   |
|                        | Fe3–C8               | 1.975(3)   |
|                        | Fe3–C9               | 1.798(3)   |
|                        | Fe3–C10              | 1.793(3)   |
|                        | Fe4–C12              | 1.808(3)   |
|                        | Fe4–C13              | 1.815(3)   |
|                        | Fe4–C14              | 1.785(3)   |
|                        | Fe6–C15              | 1.798(3)   |
|                        | Fe6–C16              | 1.806(3)   |
|                        | Fe6–C17              | 1.815(3)   |
|                        | Fe5–C18              | 1.967(3)   |
|                        | Fe5–C19              | 1.799(3)   |
|                        | Fe5–C20              | 1.788(3)   |
| Fe–Fe                  | Fe1–Fe2              | 2.7703(6)  |
|                        | Fe1–Fe3              | 2.7178(6)  |
|                        | Fe1–Fe2 <sup>1</sup> | 2.6999(6)  |
|                        | Fe1–Fe1 <sup>1</sup> | 2.6469(9)  |
|                        | Fe2–Fe3 <sup>1</sup> | 2.6224(6)  |
|                        | Fe3–Fe2              | 2.6224(6)  |
|                        | Fe3–Fe3 <sup>1</sup> | 2.6116(9)  |
|                        | Fe6–Fe4              | 2.7003(6)  |
|                        | Fe6–Fe5              | 2.6284(6)  |
|                        | Fe4–Fe6 <sup>2</sup> | 2.7699(6)  |

|                      |           |
|----------------------|-----------|
| Fe4–Fe4 <sup>2</sup> | 2.6335(9) |
| Fe5–Fe4              | 2.7519(6) |
| Fe5–Fe5 <sup>2</sup> | 2.6032(9) |
| Fe5–Fe6 <sup>2</sup> | 2.6725(7) |

**Table S6.** Bond angles for Fe<sub>6</sub>C(CO)<sub>17</sub> (**3**). <sup>1</sup><sub>-X,+Y,1/2-Z</sub>; <sup>2</sup><sub>1-X,+Y,3/2-Z</sub>

|                     | Angle (3)                               | Degrees    |
|---------------------|-----------------------------------------|------------|
| Fe–C1–Fe; Fe–C11–Fe | Fe1–C1– Fe1 <sup>1</sup>                | 88.89(18)  |
|                     | Fe1–C1– Fe2 <sup>1</sup>                | 90.45(9)   |
|                     | Fe1–C1– Fe2                             | 93.51(9)   |
|                     | Fe2–C1– Fe1 <sup>1</sup>                | 90.45(9)   |
|                     | Fe1 <sup>1</sup> –C1– Fe2 <sup>1</sup>  | 93.51(9)   |
|                     | Fe1–C1– Fe3                             | 91.90(2)   |
|                     | Fe3–C1– Fe1 <sup>1</sup>                | 178.97(14) |
|                     | Fe1–C1– Fe3 <sup>1</sup>                | 178.97(14) |
|                     | Fe1 <sup>1</sup> –C1– Fe3 <sup>1</sup>  | 91.90(2)   |
|                     | Fe2–C1– Fe2 <sup>1</sup>                | 174.4(2)   |
|                     | Fe2–C1– Fe3                             | 88.83(10)  |
|                     | Fe2 <sup>1</sup> –C1– Fe3 <sup>1</sup>  | 88.83(10)  |
|                     | Fe3–C1– Fe2 <sup>1</sup>                | 87.15(9)   |
|                     | Fe2–C1– Fe3 <sup>1</sup>                | 87.15(9)   |
|                     | Fe3–C1– Fe3 <sup>1</sup>                | 87.33(18)  |
|                     | Fe4–C11– Fe4 <sup>2</sup>               | 87.78(17)  |
|                     | Fe4–C11– Fe6                            | 90.29(9)   |
|                     | Fe4 <sup>2</sup> –C11– Fe6 <sup>2</sup> | 90.29(9)   |
|                     | Fe4 <sup>2</sup> –C11– Fe6              | 93.30(9)   |
|                     | Fe4–C11– Fe6 <sup>2</sup>               | 93.30(9)   |
|                     | Fe5 <sup>2</sup> –C11– Fe4 <sup>2</sup> | 92.85(2)   |
|                     | Fe5–C11– Fe4                            | 92.85(2)   |
|                     | Fe5–C11– Fe4 <sup>2</sup>               | 179.15(13) |
|                     | Fe4–C11– Fe5 <sup>2</sup>               | 179.15(13) |
|                     | Fe5 <sup>2</sup> –C11– Fe5              | 86.52(17)  |
|                     | Fe5–C11– Fe6                            | 87.26(9)   |
|                     | Fe5 <sup>2</sup> –C11– Fe6 <sup>2</sup> | 87.26(9)   |
|                     | Fe5 <sup>2</sup> –C11– Fe6              | 89.11(10)  |
|                     | Fe5–C11– Fe6 <sup>2</sup>               | 89.11(10)  |
| Fe–Fe–Fe            | Fe1 <sup>1</sup> –Fe1–Fe3               | 89.623(14) |
|                     | Fe2 <sup>1</sup> –Fe1–Fe2               | 88.62(2)   |
|                     | Fe3 <sup>1</sup> –Fe2–Fe1               | 89.000(18) |
|                     | Fe3–Fe2–Fe1 <sup>1</sup>                | 89.682(18) |
|                     | Fe2 <sup>1</sup> –Fe3–Fe2               | 92.62(2)   |
|                     | Fe3 <sup>1</sup> –Fe3–Fe1               | 90.369(14) |
|                     | Fe4 <sup>2</sup> –Fe4–Fe5               | 89.682(14) |
|                     | Fe5 <sup>2</sup> –Fe5–Fe4               | 90.312(14) |
|                     | Fe6–Fe5–Fe6 <sup>2</sup>                | 92.09(2)   |
|                     | Fe5–Fe6–Fe4 <sup>2</sup>                | 89.398(19) |
|                     | Fe5 <sup>2</sup> –Fe6–Fe4               | 89.976(19) |

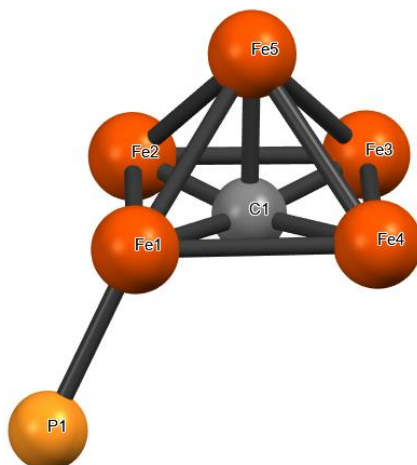

**Figure S46.** Five iron cluster framework and generalized atom numbering guide for **Tables S7-8**.

**Table S7.** Selected bond angles for **4**, **5** and **8**.

|            | Angle (3)   | Degrees  | Angle (4)   | Length (Å) | Bond (7)    | Length (Å) |
|------------|-------------|----------|-------------|------------|-------------|------------|
| Fe–C1–Fe   | Fe5–C1–Fe1  | 86.5(3)  | Fe5–C1–Fe1  | 83.88(11)  | Fe5–C1–Fe1  | 84.0(4)    |
|            | Fe5–C1–Fe2  | 85.9(3)  | Fe5–C1–Fe2  | 85.99(11)  | Fe5–C1–Fe2  | 86.0(4)    |
|            | Fe5–C1–Fe3  | 85.1(3)  | Fe5–C1–Fe3  | 83.49(11)  | Fe5–C1–Fe3  | 83.0(4)    |
|            | Fe5–C1–Fe4  | 85.1(3)  | Fe5–C1–Fe4  | 83.99(11)  | Fe5–C1–Fe4  | 85.6(4)    |
|            | Fe1–C1–Fe3  | 171.5(4) | Fe1–C1–Fe3  | 167.34(17) | Fe1–C1–Fe3  | 166.9(6)   |
|            | Fe2–C1–Fe4  | 169.7(4) | Fe2–C1–Fe4  | 168.67(17) | Fe2–C1–Fe4  | 170.5(6)   |
|            | Fe1–C1–Fe2  | 91.7(3)  | Fe1–C1–Fe2  | 93.44(13)  | Fe1–C1–Fe2  | 92.9(5)    |
|            | Fe2–C1–Fe3  | 87.6(3)  | Fe2–C1–Fe3  | 86.45(12)  | Fe2–C1–Fe3  | 87.6(4)    |
|            | Fe3–C1–Fe4  | 86.8(3)  | Fe3–C1–Fe4  | 87.17(12)  | Fe3–C1–Fe4  | 87.1(4)    |
| Fe–P–C     | Fe4–C1–Fe1  | 92.5(3)  | Fe4–C1–Fe1  | 90.75(12)  | Fe4–C1–Fe1  | 90.5(4)    |
|            | Fe1–P1–C16  | 119.0(2) | Fe1–P1–C21  | 111.08(10) | Fe1–P1–C18  | 109.9(3)   |
|            | Fe1–P1–C28  | 111.1(2) | Fe1–P1–C27  | 119.25(10) | Fe1–P1–C27  | 110.2(3)   |
| Fe–Fe–Fe   | Fe1–P1–C22  | 118.0(2) | Fe1–P1–C15  | 114.75(10) | Fe1–P1–C21  | 115.3(3)   |
|            | Fe1–Fe2–Fe3 | 91.16(5) | Fe1–Fe2–Fe3 | 89.899(19) | Fe1–Fe2–Fe3 | 90.48(7)   |
|            | Fe2–Fe3–Fe4 | 91.01(5) | Fe2–Fe3–Fe4 | 92.00(2)   | Fe2–Fe3–Fe4 | 90.49(6)   |
|            | Fe3–Fe4–Fe1 | 90.39(5) | Fe3–Fe4–Fe1 | 90.735(19) | Fe3–Fe4–Fe1 | 91.64(6)   |
| Fe1–H1–Fe2 | Fe4–Fe1–Fe2 | 87.43(4) | Fe4–Fe1–Fe2 | 87.301(18) | Fe4–Fe1–Fe2 | 87.18(6)   |
|            | –           | –        | Fe1–H1–Fe2  | 95.052     | –           | –          |

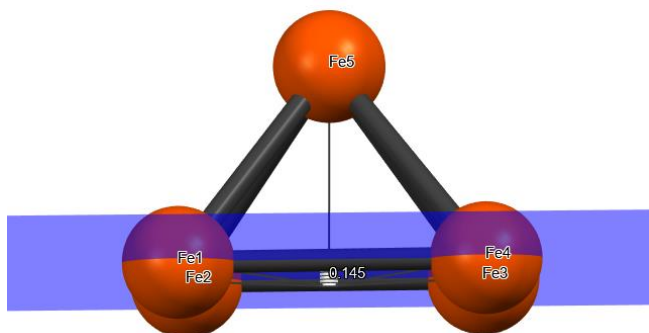

**Figure S47.** Five iron cluster framework with basal 4Fe RMS plane shown (blue), and with distance from plane to center of the interstitial carbide C1 highlighted (compound **4** used in this model).

**Table S8.** Selected bond distances for **4**, **5** and **8**; \*semi-bridging carbonyl.

|                                               | <b>Bond (3)</b> | <b>Length (Å)</b> | <b>Bond (4)</b> | <b>Length (Å)</b> | <b>Bond (7)</b> | <b>Length (Å)</b> |
|-----------------------------------------------|-----------------|-------------------|-----------------|-------------------|-----------------|-------------------|
| Fe-( $\mu_5$ -C)                              | Fe1-C1          | 1.888(8)          | Fe1-C1          | 1.859(3)          | Fe1-C1          | 1.897(10)         |
|                                               | Fe2-C1          | 1.874(8)          | Fe2-C1          | 1.852(3)          | Fe2-C1          | 1.867(10)         |
|                                               | Fe3-C1          | 1.932(8)          | Fe3-C1          | 1.879(3)          | Fe3-C1          | 1.932(10)         |
|                                               | Fe4-C1          | 1.899(8)          | Fe4-C1          | 1.857(3)          | Fe4-C1          | 1.876(10)         |
|                                               | Fe5-C1          | 1.949(7)          | Fe5-C1          | 2.015(3)          | Fe5-C1          | 1.978(10)         |
| ( $\mu_5$ -C)-Plane <sub>Fe<sub>4</sub></sub> |                 | 0.145             |                 | 0.183             |                 | 0.18              |
| Fe-P                                          | Fe1-P1          | 2.2880(18)        | Fe1-P1          | 2.2245(8)         | Fe1-P1          | 2.261(3)          |
| Fe-H                                          |                 |                   | Fe1-H1          | 1.82(5)           |                 |                   |
|                                               |                 |                   | Fe4-H1          | 1.83(5)           |                 |                   |
| C-O                                           | C2-O1           | 1.149(9)          | C2-O1           | 1.152(4)          | C2-O1           | 1.155(13)         |
|                                               | C3-O2           | 1.140(10)         | C3-O2           | 1.146(4)          | C3-O2           | 1.146(12)         |
|                                               | C4-O3           | 1.136(10)         | C4-O3           | 1.139(4)          | C4-O3           | 1.150(12)         |
|                                               | C5-O4           | 1.145(11)         | C5-O4*          | 1.163(4)          | C5-O4           | 1.117(12)         |
|                                               | C6-O5           | 1.136(10)         | C6-O5           | 1.126(4)          | C6-O5           | 1.164(12)         |
|                                               | C7-O6           | 1.132(11)         | C7-O6           | 1.152(4)          | C7-O6           | 1.154(12)         |
|                                               | C8-O7           | 1.140(11)         | C8-O7*          | 1.160(4)          | C8-O7           | 1.108(12)         |
|                                               | C9-O8           | 1.132(11)         | C9-O8           | 1.141(4)          | C9-O8           | 1.123(12)         |
|                                               | C10-O9          | 1.141(10)         | C10-O9          | 1.144(4)          | C10-O9          | 1.139(11)         |
|                                               | C11-O10         | 1.155(10)         | C11-O10         | 1.155(4)          | C11-O10         | 1.150(12)         |
|                                               | C12-O11         | 1.143(10)         | C12-O11         | 1.150(4)          | C12-O11         | 1.161(11)         |
|                                               | C13-O12         | 1.168(10)         | C13-O12         | 1.154(4)          | C13-O12         | 1.138(13)         |
|                                               | C14-O13         | 1.146(10)         | C14-O13         | 1.153(4)          | C14-O13         | 1.152(11)         |
|                                               | C15-O14         | 1.149(12)         |                 |                   | C15-O14         | 1.134(13)         |
| Fe-CO                                         | Fe1-C2          | 1.777(8)          | Fe1-C2          | 1.772(3)          | Fe1-C2          | 1.778(14)         |
|                                               | Fe1-C3          | 1.791(9)          | Fe1-C11(*)      | 1.821(3)          | Fe1-C3          | 1.777(13)         |
|                                               | Fe2-C4          | 1.813(8)          | Fe2-C3          | 1.805(4)          | Fe2-C4          | 1.773(12)         |
|                                               | Fe2-C5          | 1.791(9)          | Fe2-C4          | 1.778(3)          | Fe2-C5          | 1.806(14)         |
|                                               | Fe2-C6          | 1.811(9)          | Fe2-C5 (*)      | 1.900(3)          | Fe2-C6          | 1.772(13)         |
|                                               | Fe3-C7          | 1.814(9)          | Fe3-C5 (*)      | 2.054(3)          | Fe3-C7          | 1.789(12)         |
|                                               | Fe3-C8          | 1.813(9)          | Fe3-C6          | 1.822(3)          | Fe3-C8          | 1.822(13)         |
|                                               | Fe3-C9          | 1.809(9)          | Fe3-C7          | 1.779(3)          | Fe3-C9          | 1.814(13)         |
|                                               | Fe4-C10         | 1.801(8)          | Fe3-C8 (*)      | 2.054(3)          | Fe4-C10         | 1.807(12)         |
|                                               | Fe4-C11         | 1.793(8)          | Fe4-C8 (*)      | 1.918(3)          | Fe4-C11         | 1.777(13)         |
|                                               | Fe4-C12         | 1.795(9)          | Fe4-C9          | 1.788(3)          | Fe4-C12         | 1.749(12)         |
|                                               | Fe5-C13         | 1.776(9)          | Fe4-C10         | 1.778(3)          | Fe5-C13         | 1.798(15)         |
|                                               | Fe5-C14         | 1.797(8)          | Fe4-C11 (*)     | 2.359(3)          | Fe5-C14         | 1.773(11)         |
|                                               | Fe5-C15         | 1.796(10)         | Fe5-C12         | 1.783(3)          | Fe5-C15         | 1.811(15)         |
|                                               |                 |                   | Fe5-C13         | 1.784(3)          |                 |                   |
|                                               |                 |                   | Fe5-C14         | 1.790(3)          |                 |                   |
| Fe-Fe                                         | Fe1-Fe4         | 2.7362(15)        | Fe1-Fe4         | 2.6450(6)         | Fe1-Fe4         | 2.681(2)          |
|                                               | Fe1-Fe5         | 2.6285(15)        | Fe1-Fe5         | 2.5923(6)         | Fe1-Fe5         | 2.5937(19)        |
|                                               | Fe1-Fe2         | 2.6998(15)        | Fe1-Fe2         | 2.7018(6)         | Fe1-Fe2         | 2.728(2)          |
|                                               | Fe4-Fe5         | 2.6014(16)        | Fe4-Fe5         | 2.5937(6)         | Fe4-Fe5         | 2.619(2)          |
|                                               | Fe4-Fe3         | 2.6326(16)        | Fe4-Fe3         | 2.5757(6)         | Fe4-Fe3         | 2.624(2)          |
|                                               | Fe5-Fe3         | 2.6248(16)        | Fe5-Fe3         | 2.5949(6)         | Fe5-Fe3         | 2.590(2)          |
|                                               | Fe5-Fe2         | 2.6045(16)        | Fe5-Fe2         | 2.6400(6)         | Fe5-Fe2         | 2.623(2)          |
|                                               | Fe3-Fe2         | 2.6341(16)        | Fe3-Fe2         | 2.5552(6)         | Fe3-Fe2         | 2.628(2)          |

**Table S9.** Selected bond distances for three iron cluster units in compounds **6**, **7\***, **10** and **11**. \*See crystallographic experimental details and remarks on **7** for the limitations of the data set for structure **7**. The unit cell for **7** contains two iron cluster molecules of equivalent atomic compositions and arrangements, only one of which is tabulated here for general reference.

|                 | <b>Bond (5)</b>     | <b>Length (Å)</b> | <b>Bond (6)</b> | <b>Length (Å)</b> | <b>Bond (9)</b> | <b>Length (Å)</b> | <b>Bond (10)</b> | <b>Length (Å)</b> |
|-----------------|---------------------|-------------------|-----------------|-------------------|-----------------|-------------------|------------------|-------------------|
| Fe-( $\mu$ 3-C) | Fe1-C1              | 1.87(1)           | Fe1-C1          | 1.946(13)         | Fe2-C1          | 1.952(2)          | Fe1-C1           | 2.0037(17)        |
|                 | Fe2-C1              | 1.880(8)          | Fe2-C1          | 1.933(14)         | Fe3-C1          | 1.952(2)          | Fe2-C1           | 1.9973(17)        |
|                 | Fe3-C1              | 1.88(1)           | Fe3-C1          | 1.953(13)         | Fe4-C1          | 1.925(2)          | Fe3-C1           | 1.9046(18)        |
| ( $\mu$ 3-C)-R  | C1-H1               | 1.00(3)           | C1-P3           | 1.785(15)         | C1-C2           | 1.457(3)          | C1-C2            | 1.478(2)          |
| Fe-P            | Fe1-P1              | 2.5286(5)         | Fe1-P2          | 2.249(4)          | Fe1-P1          | 2.2229(6)         | Fe1-P1           | 2.2663(5)         |
|                 | Fe1-P1 <sup>1</sup> | 2.3292(6)         | Fe1-P1          | 2.248(4)          | Fe1-P2          | 2.2728(6)         | Fe2-P2           | 2.2334(5)         |
|                 | Fe1-P2              | 2.3238(5)         | —               | —                 | Fe1-P3          | 2.2230(7)         | Fe1-P3           | 2.2010(5)         |
|                 | Fe1-P2 <sup>1</sup> | 2.3237(5)         | —               | —                 | —               | —                 | Fe2-P3           | 2.2116(5)         |
| Fe-Fe           | Fe2-Fe3             | 2.5286(5)         | Fe1-Fe2         | 2.591(3)          | Fe2-Fe4         | 2.5715(5)         | Fe1-Fe2          | 2.5907(4)         |
|                 | Fe3-Fe4             | 2.5845(5)         | Fe1-Fe3         | 2.578(3)          | Fe3-Fe4         | 2.5698(5)         | Fe1-Fe3          | 2.5900(4)         |
|                 | Fe4-Fe2             | 2.5644(6)         | Fe2-Fe3         | 2.550(4)          | Fe2-Fe3         | 2.5355(5)         | Fe2-Fe3          | 2.6059(4)         |

**Table S10.** Selected bond angles for three iron cluster units in compounds **6** and **7\***. \*See crystallographic experimental details and remarks on **7** for the limitations of the data set for structure **7**. Additionally, the unit cell for **7** contains two iron cluster molecules of equivalent atomic compositions and arrangements, only one of which is tabulated here for general reference.

|                       | <b>Angle (5)</b> | <b>Length (Å)</b> | <b>Angle (6)</b> | <b>Length (Å)</b> |
|-----------------------|------------------|-------------------|------------------|-------------------|
| Fe- ( $\mu$ 3-C) - Fe | Fe2-C1-Fe3       | 79.83(10)         | Fe1-C1-Fe2       | 83.8(5)           |
|                       | Fe2-C1-Fe4       | 83.57(11)         | Fe2-C1-Fe3       | 82.0(5)           |
|                       | Fe3-C1-Fe4       | 85.11(11)         | Fe3-C1-Fe1       | 82.0(5)           |
|                       | Fe2-C1-Fe3       | 79.83(10)         | Fe1-C1-Fe2       | 83.8(5)           |
| Fe-P-C                | Fe1-P2-C37       | 117.55(7)         | —                | —                 |
|                       | Fe1-P2-C25       | 117.03(8)         | —                | —                 |
|                       | Fe1-P2-C18       | 108.17(7)         | —                | —                 |
|                       | Fe1-P1-C13       | 108.77(8)         | —                | —                 |
|                       | Fe1-P1-C19       | 118.05(8)         | —                | —                 |
|                       | Fe1-P1-C25       | 117.03(8)         | —                | —                 |
| Fe- ( $\mu$ 3-C) - P  | —                | —                 | Fe1-C1-P3        | 134.3(7)          |
| Fe-Fe-Fe              | Fe2-Fe3-Fe4      | 60.190(15)        | Fe1-Fe2-Fe3      | 60.18(8)          |
|                       | Fe3-Fe2-Fe4      | 60.986(15)        | Fe2-Fe3-Fe1      | 60.69(8)          |
|                       | Fe2-Fe4-Fe3      | 58.824(15)        | Fe3-Fe1-Fe2      | 59.12(9)          |

**Table S11.** Selected bond angles for three iron cluster units in compounds **10** and **11**.

|                           | Angle (9)   | Length (Å) | Angle (10)  | Length (Å)  |
|---------------------------|-------------|------------|-------------|-------------|
| Fe–(μ <sub>3</sub> -C)–Fe | Fe2–C1–Fe3  | 81.00(9)   | Fe1–C1–Fe2  | 80.71(6)    |
|                           | Fe3–C1–Fe4  | 83.02(9)   | Fe2–C1–Fe3  | 83.77(7)    |
|                           | Fe4–C1–Fe2  | 83.11(9)   | Fe3–C1–Fe1  | 82.97(7)    |
|                           | Fe2–C1–Fe3  | 81.00(9)   | Fe1–C1–Fe2  | 80.71(6)    |
| Fe–P–C                    | –           | –          | Fe2–P2–C18  | 115.07(6)   |
|                           | –           | –          | Fe2–P2–C32  | 115.97(6)   |
|                           | –           | –          | Fe2–P2–C38  | 118.24(6)   |
|                           | –           | –          | Fe1–P1–C17  | 121.63(6)   |
|                           | –           | –          | Fe1–P1–C26  | 118.23(6)   |
|                           | –           | –          | Fe1–P1–C20  | 108.64(6)   |
| Fe–Fe–Fe                  | Fe3–Fe2–Fe4 | 60.417(14) | Fe1–Fe2–Fe3 | 59.787(10)  |
|                           | Fe2–Fe3–Fe4 | 60.485(15) | Fe2–Fe3–Fe1 | 59.8816(10) |
|                           | Fe3–Fe4–Fe2 | 59.099(14) | Fe3–Fe1–Fe2 | 60.397(10)  |

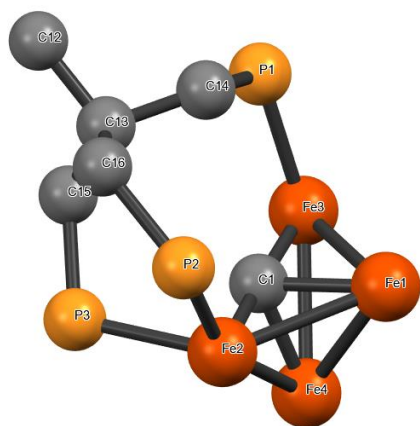**Figure S48.** Simplified four iron cluster framework and atom numbering guide for compound **9**.**Table S12.** Selected bond distances for **9** and literature values for Fe<sub>4</sub>(CO)<sub>13</sub>, Fe<sub>4</sub>(CO)<sub>12</sub><sup>2-</sup>, Fe<sub>4</sub>(CH)(CO)<sub>12</sub>.

|                        | Bond (8) | Length (Å) |
|------------------------|----------|------------|
| Fe–(μ <sub>4</sub> -C) | Fe1–C1   | 1.962(7)   |
|                        | Fe2–C1   | 1.801(7)   |
|                        | Fe3–C1   | 1.813(7)   |
|                        | Fe4–C1   | 1.943(7)   |
| Fe–P                   | Fe3–P1   | 2.247(2)   |
|                        | Fe2–P2   | 2.269(2)   |
|                        | Fe2–P3   | 2.2545(19) |
| Fe–Fe                  | Fe1–Fe2  | 2.6016(15) |
|                        | Fe1–Fe3  | 2.6332(15) |
|                        | Fe1–Fe4  | 2.5287(15) |
|                        | Fe2–Fe4  | 2.7028(16) |
|                        | Fe3–Fe4  | 2.6326(16) |

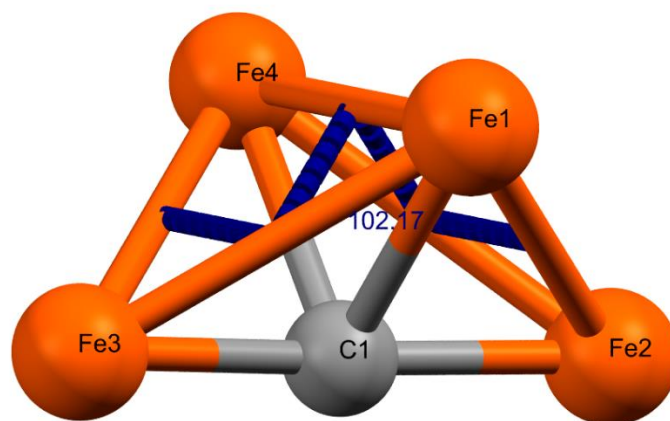

**Figure S49.** Four iron cluster core of **9** with wing to wing torsion highlighted.

**Table S13.** Selected bond angle and torsion for **9**.

|                               | Angle (°) |
|-------------------------------|-----------|
| Fe2–C <sub>carbide</sub> –Fe3 | 175.3(4)  |
| Wing to wing torsion          | 102.17    |

## Computational Methods

Calculations were performed using the ORCA versions 4 and 5 software package.<sup>16,17</sup> We thank the Texas Advanced Computing Center for providing an allocation to run these calculations on the Stampede2 supercomputer (see acknowledgements). Chemcraft was used for optimization and frequency analysis visualizations and structure comparisons.<sup>18</sup> Computational methods (functionals, etc.) are detailed *vide infra*.

### Computational Modeling of 2: Approach and remarks on DFT functional and basis set screening and using $[\text{Fe}_5(\mu_5\text{-C})(\text{CO})_{15}]$ as a benchmark

**Remarks on computational modeling approach, selected methods, and initial screening with  $[\text{Fe}_5(\mu_5\text{-C})(\text{CO})_{15}]$ .** Before attempting to model the geometry of the structurally elusive compound **2**, we compared common DFT methods for geometry optimization by evaluating their suitability for analysis of the known neutral iron cluster,  $[\text{Fe}_5(\mu_5\text{-C})(\text{CO})_{15}]$ . We especially sought to evaluate how the percentage HF contribution affects the convergence, output geometry, calculated single point energies, HOMO-LUMO gap and frequency outputs to inform our functional choice for this and future studies when evaluating iron carbide carbonyl clusters.

Functionals were selected based on their percentage HF exchange and whether they are used for geometry optimization of metal complexes in the literature.<sup>19</sup> Of these functionals, B3LYP is the most popular functional, with accuracy highly variable depending on the system in question (CITATION). According to Kepp et. al ('Chemical Bond Energies...')<sup>20</sup>, hybrid functionals with 10-20% HF is suggested for early transition metals while 0-10% is suggested for late transition metals. Although the suggested %HF decreases as period increases, Fe is midway i.e., neither early or late transition metal. With this in mind, we decided to intentionally vary the percentage HF exchange in our functional selections.

**Table S14.** Hartree Fock exchange (HFX) with selected functionals. †no D4

| Functional          | Global HFX | Short-Range HFX | Long-Range HFX |
|---------------------|------------|-----------------|----------------|
| B3PW91 <sup>†</sup> | 0.200      | -               | -              |
| BP86                | 0.000      | -               | -              |
| B3LYP               | 0.200      | -               | -              |
| B3LYP-15            | 0.150      | -               | -              |
| ωB97x               | -          | 0.167           | 1.000          |
| ωB97x-15            | -          | 0.150           | 1.000          |

The choice of functional is crucial to accurately representing the electron density. Since functionals vary depending on the metal, ligand and its bond strength, we started with a myriad of functionals. Initially, we screened functionals and basis sets with the known anionic, six-iron cluster and precursor to our target compound **2**, namely  $[\text{Fe}_6(\mu_6\text{-C})(\text{CO})_{16}]^{2-}$  (**1**). However, we found that approaches that proved sufficient for neutral clusters analysis are, in fact, not sufficient for anionic clusters. We continue to explore solutions for this problem (including ranged functionals with solvation models and the counterions included) to identify methods applicable to anionic clusters. However, this report focuses only on the neutral model,  $[\text{Fe}_5(\mu_5\text{-C})(\text{CO})_{15}]$ .

Basis sets were selected based on literature precedent. The Ahlrichs def2 basis set family was selected as the most reasonable basis set choice for a minimal HF exchange approach. Triple-zeta or large basis sets were used to model the Fe orbitals, with larger basis sets tested. In literature and in our study (*vide infra*), geometry variation between basis set choice is minimal.<sup>21</sup> The TZV series with the P polarization basis is sufficient for DFT calculations.

Optimized geometries can be verified in different ways, e.g. comparison with experimental data, calculating single point energy (SPE), or vibrational analysis. Vibrational analysis indicated if the converged geometry is at a minimum instead of a saddlepoint, while SPE determined the energy based on the converged geometry's spatial positions, and differentiated whether the geometry is at local or global minimum.<sup>22</sup> Conventionally, geometries with imaginary frequencies indicate that the final geometry is not at local or global minimum.

**Table S15.** Convergence of optimization and vibrational analyses with selected functionals and basis set combinations on cluster  $[\text{Fe}_5(\mu_5\text{-C})(\text{CO})_{15}]$ . D4 dispersion corrections were applied to all calculations unless specified otherwise.

| ma-def2-TZVP              |                    |                      |                           | Grid 2, tightopt   |                      |                           | Grid 3, verytightopt |                      |                           |
|---------------------------|--------------------|----------------------|---------------------------|--------------------|----------------------|---------------------------|----------------------|----------------------|---------------------------|
| Functional                | Geometry Optimized | Vibrational Analysis | No. imaginary frequencies | Geometry Optimized | Vibrational Analysis | No. imaginary frequencies | Geometry Optimized   | Vibrational Analysis | No. imaginary frequencies |
| <b>B3PW91<sup>†</sup></b> | ✓                  | ✓                    | 0                         | ✓                  | ✓                    | 2                         | ✓                    | ✓                    | 2                         |
| <b>BP86</b>               | ✓                  | ✓                    | 0                         | ✓                  | ✓                    | 1                         | ✓                    | ✓                    | 1                         |
| <b>B3LYP</b>              | ✓                  | ✓                    | 0                         | ✓                  | ✓                    | 1                         | ✓                    | ✓                    | 1                         |
| <b>B3LYP-15</b>           | ✓                  | ✓                    | 0                         | -                  | -                    | N/A                       | -                    | -                    | N/A                       |
| <b>ωB97x</b>              | ✓                  | ✓                    | 1                         | -                  | -                    | N/A                       | -                    | -                    | N/A                       |
| <b>ωB97x-15</b>           | ✓                  | ✓                    | 1                         | -                  | -                    | N/A                       | -                    | -                    | N/A                       |

<sup>†</sup>no D4

**Remarks:** Each successful frequency calculation generated an IR and Raman spectra. Increasing the basis set size did not help resolve imaginary frequencies, instead impeding convergence, and unexpectedly introduced new imaginary frequencies for the functionals B3PW91, BP86, and B3LYP.

**Table S16.** Optimized geometries versus experimental crystal structure geometry RMSD of  $[\text{Fe}_5(\mu_5\text{-C})(\text{CO})_{15}]$  with selected functionals. Ma-def2-TZVP, grid 2, tightopt, D4 applied to all calculations except B3PW91. \*calculations with imaginary frequencies (see details table SX). Experimental crystal structure data used available in CCDC 1552287. Weighted RMSD calculated by minimizing RMSD for iron atoms using Chemcraft's structure comparer tool.<sup>18</sup>

| Functional       | RMSD - weighted    | RMSD - unweighted |
|------------------|--------------------|-------------------|
| <b>B3PW91</b>    | 0.0196937733211684 | 0.277776423109345 |
| <b>BP86</b>      | 0.0457291297063557 | 0.383227600540954 |
| <b>B3LYP</b>     | 0.0310725142848452 | 0.304380725932335 |
| <b>ωB97x*</b>    | 0.0760684573893122 | 0.400790556736424 |
| <b>B3LYP-15</b>  | 0.0244972042149182 | 0.303604053065301 |
| <b>ωB97X-15*</b> | 0.0727470945996918 | 0.399491573766197 |

**Table S17.** Selected bond lengths (Å) and angles (°) of optimized geometries versus experimental crystal structure geometry of  $[\text{Fe}_5(\mu_5\text{-C})(\text{CO})_{15}]$  with selected functionals. Ma-def2-TZVP, grid 2, tightopt, D4 applied to all except B3PW91. Experimental crystal structure data used available in CCDC 1552287.

|                                       | <b>XRD</b> | <b>B3PW91</b> | <b>BP86</b> | <b>B3LYP</b> | <b>*ωB97x</b> | <b>B3LYP-15</b> | <b>*ωB97X-15</b> |
|---------------------------------------|------------|---------------|-------------|--------------|---------------|-----------------|------------------|
| <b>axial Fe1–C1</b>                   | 1.948(7)   | 1.930         | 1.933       | 1.930        | 1.920         | 1.929           | 1.927            |
| <b>Fe2–C1</b>                         | 1.875(8)   | 1.844         | 1.874       | 1.858        | 1.848         | 1.859           | 1.854            |
| <b>Fe3–C1</b>                         | 1.897(7)   | 1.877         | 1.882       | 1.893        | 1.840         | 1.893           | 1.848            |
| <b>Fe4–C1</b>                         | 1.865(8)   | 1.858         | 1.884       | 1.875        | 1.856         | 1.875           | 1.863            |
| <b>Fe5–C1</b>                         | 1.893(7)   | 1.883         | 1.885       | 1.902        | 1.852         | 1.902           | 1.859            |
| <b>Fe2-C1-Fe1</b>                     | 88.0(3)    | 88.445        | 90.144      | 90.095       | 84.136        | 89.955          | 84.219           |
| <b>Fe3-C1-Fe1</b>                     | 84.6(3)    | 85.107        | 89.837      | 86.689       | 87.027        | 86.503          | 87.036           |
| <b>Fe2-Fe5-Fe4</b>                    | 89.09(4)   | 89.544        | 89.754      | 89.315       | 90.663        | 89.396          | 90.618           |
| <b>Fe4-Fe3-Fe2</b>                    | 89.61(4)   | 88.858        | 89.983      | 88.774       | 89.599        | 88.812          | 89.602           |
| <b>Fe2–C1–Fe4</b>                     | 175.8(4)   | 176.831       | 173.686     | 179.00       | 172.003       | 179.093         | 172.021          |
| <b>Fe3–C1–Fe5</b>                     | 169.6(5)   | 169.679       | 174.147     | 172.434      | 173.039       | 172.112         | 173.026          |
| <b>Fe1-Fe2</b>                        | 2.6557(16) | 2.629         | 2.615       | 2.681        | 2.525         | 2.678           | 2.536            |
| <b>Fe1-Fe3</b>                        | 2.5869(15) | 2.571         | 2.641       | 2.624        | 2.590         | 2.619           | 2.600            |
| <b>Fe1-Fe4</b>                        | 2.6466(16) | 2.641         | 2.637       | 2.700        | 2.623         | 2.686           | 2.631            |
| <b>Fe1-Fe5</b>                        | 2.5997(14) | 2.564         | 2.606       | 2.611        | 2.582         | 2.605           | 2.591            |
| <b>Fe2-Fe3</b>                        | 2.6331(15) | 2.653         | 2.659       | 2.681        | 2.641         | 2.676           | 2.650            |
| <b>Fe3-Fe4</b>                        | 2.6703(15) | 2.633         | 2.659       | 2.656        | 2.602         | 2.661           | 2.621            |
| <b>Fe4-Fe5</b>                        | 2.6780(15) | 2.623         | 2.654       | 2.648        | 2.577         | 2.650           | 2.588            |
| <b>Fe5-Fe2</b>                        | 2.6469(15) | 2.631         | 2.653       | 2.664        | 2.618         | 2.659           | 2.627            |
| <b>Fe2Fe3Fe4Fe5<br/>(rmsplane)-C1</b> | 0.119      | 0.092         | 0.081       | 0.057        | 0.081         | 0.057           | 0.117            |

**Table S18.** All calculated vibrational modes with and without scaling factors applied. Scaling factors detailed below this table. Ma-def2-TZVP, grid 2, tightopt, D4 applied to all except B3PW91. Imaginary frequencies marked with italics.

|      | Unscaled |       |               |                  |       |          | Scaled              |                    |                            |                  |                   |          |
|------|----------|-------|---------------|------------------|-------|----------|---------------------|--------------------|----------------------------|------------------|-------------------|----------|
| Mode | B3PW91   | B3LYP | $\omega$ B97x | $\omega$ B97x-15 | BP86  | B3LYP-15 | B3PW91 <sup>A</sup> | B3LYP <sup>B</sup> | $\omega$ B97x <sup>D</sup> | $\omega$ B97x-15 | BP86 <sup>C</sup> | B3LYP-15 |
| 0    | 0        | 0     | 0             | 0                | 0     | 0        | 0                   | 0                  | 0                          | 0                | 0                 | 0        |
| 1    | 0        | 0     | 0             | 0                | 0     | 0        | 0                   | 0                  | 0                          | 0                | 0                 | 0        |
| 2    | 0        | 0     | 0             | 0                | 0     | 0        | 0                   | 0                  | 0                          | 0                | 0                 | 0        |
| 3    | 0        | 0     | 0             | 0                | 0     | 0        | 0                   | 0                  | 0                          | 0                | 0                 | 0        |
| 4    | 0        | 0     | 0             | 0                | 0     | 0        | 0                   | 0                  | 0                          | 0                | 0                 | 0        |
| 5    | 0        | 0     | 0             | 0                | 0     | 0        | 0                   | 0                  | 0                          | 0                | 0                 | 0        |
| 6    | 12.69    | 14.22 | <i>-12.05</i> | <i>-8.12</i>     | 9.16  | 15.1     | 12.23316            | 14.28257           | <i>-11.9464</i>            | <i>-8.12</i>     | 9.468692          | 15.1     |
| 7    | 22.47    | 24.34 | 15.35         | 12.53            | 18.39 | 22.24    | 21.66108            | 24.4471            | 15.21799                   | 12.53            | 19.00974          | 22.24    |
| 8    | 31.69    | 33.14 | 25.31         | 25.74            | 27.73 | 35.06    | 30.54916            | 33.28582           | 25.09233                   | 25.74            | 28.6645           | 35.06    |
| 9    | 35.28    | 33.93 | 33.79         | 33.62            | 34.85 | 36.18    | 34.00992            | 34.07929           | 33.49941                   | 33.62            | 36.02445          | 36.18    |
| 10   | 46.18    | 43.07 | 41.21         | 41.39            | 37.25 | 41.4     | 44.51752            | 43.25951           | 40.85559                   | 41.39            | 38.50533          | 41.4     |
| 11   | 53.79    | 52.26 | 48.31         | 48.45            | 39.63 | 52.36    | 51.85356            | 52.48994           | 47.89453                   | 48.45            | 40.96553          | 52.36    |
| 12   | 60.67    | 60.45 | 63.7          | 64.3             | 57.05 | 60.46    | 58.48588            | 60.71598           | 63.15218                   | 64.3             | 58.97259          | 60.46    |
| 13   | 62.09    | 65.25 | 66.16         | 66.23            | 62.2  | 66.13    | 59.85476            | 65.5371            | 65.59102                   | 66.23            | 64.29614          | 66.13    |
| 14   | 69.21    | 71.42 | 68.97         | 68.88            | 67.61 | 71.56    | 66.71844            | 71.73425           | 68.37686                   | 68.88            | 69.88846          | 71.56    |
| 15   | 73.92    | 73.53 | 73            | 73.19            | 70.55 | 74.42    | 71.25888            | 73.85353           | 72.3722                    | 73.19            | 72.92754          | 74.42    |
| 16   | 75.69    | 74.73 | 76.26         | 76.37            | 75.67 | 77.4     | 72.96516            | 75.05881           | 75.60416                   | 76.37            | 78.22008          | 77.4     |
| 17   | 80.67    | 79.39 | 81.34         | 81.26            | 79.41 | 80       | 77.76588            | 79.73932           | 80.64048                   | 81.26            | 82.08612          | 80       |
| 18   | 81.52    | 81.68 | 82.85         | 82.96            | 81.89 | 83.37    | 78.58528            | 82.03939           | 82.13749                   | 82.96            | 84.64969          | 83.37    |
| 19   | 57.65    | 86.05 | 87.09         | 86.82            | 83.27 | 85.73    | 84.4946             | 86.42862           | 86.34103                   | 86.82            | 86.0762           | 85.73    |
| 20   | 88.95    | 87.91 | 89.72         | 89.52            | 84.38 | 87.86    | 85.7478             | 88.2968            | 88.94841                   | 89.52            | 87.22361          | 87.86    |
| 21   | 90.55    | 89.08 | 90.64         | 90.52            | 87.71 | 90.81    | 87.2902             | 89.47195           | 89.8605                    | 90.52            | 90.66583          | 90.81    |
| 22   | 94.34    | 93.22 | 96.22         | 95.95            | 88.85 | 93.98    | 90.94376            | 93.63017           | 95.39251                   | 95.95            | 91.84425          | 93.98    |
| 23   | 96.52    | 95.96 | 98.19         | 97.92            | 94.4  | 95.23    | 93.04528            | 96.38222           | 97.34557                   | 97.92            | 97.58128          | 95.23    |
| 24   | 99.37    | 97.63 | 100.03        | 99.39            | 94.54 | 96.87    | 95.79268            | 98.05957           | 99.16974                   | 99.39            | 97.726            | 96.87    |
| 25   | 101.13   | 99.78 | 102.98        | 102.44           | 96.34 | 101.12   | 97.48932            | 100.219            | 102.0944                   | 102.44           | 99.58666          | 101.12   |

|    |        |        |        |        |        |        |          |          |          |        |          |        |
|----|--------|--------|--------|--------|--------|--------|----------|----------|----------|--------|----------|--------|
| 26 | 103.1  | 101.56 | 103.46 | 102.98 | 97.9   | 102.13 | 99.3884  | 102.0069 | 102.5702 | 102.98 | 101.1992 | 102.13 |
| 27 | 104.19 | 101.83 | 105.42 | 104.76 | 100.32 | 102.36 | 100.4392 | 102.2781 | 104.5134 | 104.76 | 103.7008 | 102.36 |
| 28 | 107.48 | 104.96 | 107.15 | 106.54 | 101.33 | 104.96 | 103.6107 | 105.4218 | 106.2285 | 106.54 | 104.7448 | 104.96 |
| 29 | 108.77 | 108.29 | 115.81 | 115.36 | 106.16 | 106.94 | 104.8543 | 108.7665 | 114.814  | 115.36 | 109.7376 | 106.94 |
| 30 | 115.43 | 113.06 | 129.14 | 128.86 | 119.94 | 116.85 | 111.2745 | 113.5575 | 128.0294 | 128.86 | 123.982  | 116.85 |
| 31 | 124.74 | 122.69 | 132.8  | 132.19 | 126.5  | 126.99 | 120.2494 | 123.2298 | 131.6579 | 132.19 | 130.7631 | 126.99 |
| 32 | 130.22 | 129.41 | 137.01 | 136.22 | 129.85 | 129.83 | 125.5321 | 129.9794 | 135.8317 | 136.22 | 134.2259 | 129.83 |
| 33 | 132.61 | 130.85 | 144.84 | 143.92 | 132.44 | 131.34 | 127.836  | 131.4257 | 143.5944 | 143.92 | 136.9032 | 131.34 |
| 34 | 142.94 | 141.14 | 151.91 | 151.32 | 139.7  | 145.22 | 137.7942 | 141.761  | 150.6036 | 151.32 | 144.4079 | 145.22 |
| 35 | 149.52 | 145.05 | 156.98 | 156.9  | 142.92 | 149.69 | 144.1373 | 145.6882 | 155.63   | 156.9  | 147.7364 | 149.69 |
| 36 | 158.53 | 151.97 | 162.22 | 161.6  | 149.06 | 155.89 | 152.8229 | 152.6387 | 160.8249 | 161.6  | 154.0833 | 155.89 |
| 37 | 159.93 | 154.02 | 163.62 | 162.89 | 162.64 | 157.47 | 154.1725 | 154.6977 | 162.2129 | 162.89 | 168.121  | 157.47 |
| 38 | 166.18 | 158.97 | 170.36 | 169.34 | 164.33 | 162.55 | 160.1975 | 159.6695 | 168.8949 | 169.34 | 169.8679 | 162.55 |
| 39 | 190.75 | 181.26 | 205.49 | 204.17 | 186.37 | 185.59 | 183.883  | 182.0575 | 203.7228 | 204.17 | 192.6507 | 185.59 |
| 40 | 198.83 | 190.35 | 213.28 | 211.64 | 188.73 | 193.46 | 191.6721 | 191.1875 | 211.4458 | 211.64 | 195.0902 | 193.46 |
| 41 | 206.35 | 194.48 | 221.62 | 220.51 | 206.85 | 200.19 | 198.9214 | 195.3357 | 219.7141 | 220.51 | 213.8208 | 200.19 |
| 42 | 210.27 | 198.59 | 223.23 | 221.93 | 208.91 | 206.98 | 202.7003 | 199.4638 | 221.3102 | 221.93 | 215.9503 | 206.98 |
| 43 | 216.99 | 205.84 | 232.68 | 230.9  | 210.94 | 214.5  | 209.1784 | 206.7457 | 230.679  | 230.9  | 218.0487 | 214.5  |
| 44 | 255.12 | 244.78 | 272.83 | 270.78 | 255.72 | 254.23 | 245.9357 | 245.857  | 270.4837 | 270.78 | 264.3378 | 254.23 |
| 45 | 404.98 | 392.92 | 411.68 | 409.81 | 377.03 | 391.21 | 390.4007 | 394.6488 | 408.1396 | 409.81 | 389.7359 | 391.21 |
| 46 | 410.62 | 398.54 | 416.24 | 413.47 | 386.45 | 397.82 | 395.8377 | 400.2936 | 412.6603 | 413.47 | 399.4734 | 397.82 |
| 47 | 413.12 | 402.04 | 420.53 | 417.69 | 398.05 | 400.24 | 398.2477 | 403.809  | 416.9134 | 417.69 | 411.4643 | 400.24 |
| 48 | 416.88 | 405.35 | 421.85 | 419.11 | 403.12 | 403.34 | 401.8723 | 407.1335 | 418.2221 | 419.11 | 416.7051 | 403.34 |
| 49 | 422.86 | 410.27 | 427.17 | 424.39 | 404.99 | 410.2  | 407.637  | 412.0752 | 423.4963 | 424.39 | 418.6382 | 410.2  |
| 50 | 423.87 | 411.3  | 428.72 | 426.32 | 406.82 | 411.49 | 408.6107 | 413.1097 | 425.033  | 426.32 | 420.5298 | 411.49 |
| 51 | 426.38 | 413    | 431.1  | 428.59 | 409.14 | 412.76 | 411.0303 | 414.8172 | 427.3925 | 428.59 | 422.928  | 412.76 |
| 52 | 431.09 | 417.38 | 437.93 | 434.83 | 411.91 | 417.62 | 415.5708 | 419.2165 | 434.1638 | 434.83 | 425.7914 | 417.62 |
| 53 | 434.6  | 420.03 | 438.46 | 436.58 | 417.36 | 422.3  | 418.9544 | 421.8781 | 434.6892 | 436.58 | 431.425  | 422.3  |
| 54 | 439.78 | 426.46 | 444.42 | 441.95 | 422.06 | 429.44 | 423.9479 | 428.3364 | 440.598  | 441.95 | 436.2834 | 429.44 |
| 55 | 441.28 | 427.85 | 448.43 | 445.55 | 430.47 | 431.39 | 425.3939 | 429.7325 | 444.5735 | 445.55 | 444.9768 | 431.39 |
| 56 | 443.48 | 429.77 | 450.44 | 447.79 | 432.18 | 432.41 | 427.5147 | 431.661  | 446.5662 | 447.79 | 446.7445 | 432.41 |

|    |        |        |        |        |        |        |          |          |          |        |          |        |
|----|--------|--------|--------|--------|--------|--------|----------|----------|----------|--------|----------|--------|
| 57 | 456.73 | 441.63 | 464.14 | 461.45 | 443.7  | 448.06 | 440.2877 | 443.5732 | 460.1484 | 461.45 | 458.6527 | 448.06 |
| 58 | 457.23 | 442.89 | 465.73 | 463.01 | 445    | 448.8  | 440.7697 | 444.8387 | 461.7247 | 463.01 | 459.9965 | 448.8  |
| 59 | 465.59 | 451.32 | 471.31 | 468.82 | 447.74 | 457.69 | 448.8288 | 453.3058 | 467.2567 | 468.82 | 462.8288 | 457.69 |
| 60 | 488.11 | 469.23 | 481.22 | 479.02 | 477.44 | 476.53 | 470.538  | 471.2946 | 477.0815 | 479.02 | 493.5297 | 476.53 |
| 61 | 490.53 | 470.05 | 483.27 | 481.1  | 484.03 | 479.08 | 472.8709 | 472.1182 | 479.1139 | 481.1  | 500.3418 | 479.08 |
| 62 | 500.07 | 477.16 | 487.7  | 485.16 | 489.72 | 487.31 | 482.0675 | 479.2595 | 483.5058 | 485.16 | 506.2236 | 487.31 |
| 63 | 503.75 | 483.55 | 495.67 | 492.81 | 495.97 | 492.1  | 485.615  | 485.6776 | 491.4072 | 492.81 | 512.6842 | 492.1  |
| 64 | 509.74 | 488.6  | 504.03 | 501.18 | 500.3  | 496.15 | 491.3894 | 490.7498 | 499.6953 | 501.18 | 517.1601 | 496.15 |
| 65 | 519.23 | 498.21 | 515.11 | 513.15 | 510.06 | 505.53 | 500.5377 | 500.4021 | 510.6801 | 513.15 | 527.249  | 505.53 |
| 66 | 521.06 | 501.18 | 518.41 | 515.37 | 514.27 | 508.35 | 502.3018 | 503.3852 | 513.9517 | 515.37 | 531.6009 | 508.35 |
| 67 | 525.2  | 502.77 | 522.17 | 519.11 | 517.33 | 512.43 | 506.2928 | 504.9822 | 517.6793 | 519.11 | 534.764  | 512.43 |
| 68 | 530.15 | 509.68 | 532.09 | 529.11 | 522.26 | 516.88 | 511.0646 | 511.9226 | 527.514  | 529.11 | 539.8602 | 516.88 |
| 69 | 532.29 | 511.6  | 533.45 | 530.21 | 523.91 | 518.2  | 513.1276 | 513.851  | 528.8623 | 530.21 | 541.5658 | 518.2  |
| 70 | 533.8  | 512.45 | 539.35 | 535.53 | 528.47 | 518.78 | 514.5832 | 514.7048 | 534.7116 | 535.53 | 546.2794 | 518.78 |
| 71 | 539.13 | 519.43 | 546.93 | 543.3  | 528.92 | 525.05 | 519.7213 | 521.7155 | 542.2264 | 543.3  | 546.7446 | 525.05 |
| 72 | 541.19 | 520.44 | 550.6  | 546.58 | 530.36 | 527.22 | 521.7072 | 522.7299 | 545.8648 | 546.58 | 548.2331 | 527.22 |
| 73 | 546.7  | 524.49 | 556.08 | 552.7  | 540.54 | 535.39 | 527.0188 | 526.7978 | 551.2977 | 552.7  | 558.7562 | 535.39 |
| 74 | 550.85 | 530.63 | 566.15 | 563.14 | 544    | 537.91 | 531.0194 | 532.9648 | 561.2811 | 563.14 | 562.3328 | 537.91 |
| 75 | 567.02 | 549.48 | 573.84 | 569.55 | 545.47 | 556.62 | 546.6073 | 551.8977 | 568.905  | 569.55 | 563.8523 | 556.62 |
| 76 | 582.26 | 560.3  | 588.87 | 585.23 | 570.8  | 568.93 | 561.2986 | 562.7653 | 583.8057 | 585.23 | 590.036  | 568.93 |
| 77 | 585.81 | 566.5  | 591.64 | 587.67 | 571.5  | 573.47 | 564.7208 | 568.9926 | 586.5519 | 587.67 | 590.7596 | 573.47 |
| 78 | 588.29 | 569.28 | 600.75 | 596.42 | 573.5  | 574.84 | 567.1116 | 571.7848 | 595.5836 | 596.42 | 592.827  | 574.84 |
| 79 | 599.95 | 579.38 | 606.71 | 602.78 | 575.51 | 587.22 | 578.3518 | 581.9293 | 601.4923 | 602.78 | 594.9047 | 587.22 |
| 80 | 602.45 | 581.46 | 610.86 | 606.37 | 583.88 | 588.19 | 580.7618 | 584.0184 | 605.6066 | 606.37 | 603.5568 | 588.19 |
| 81 | 603.22 | 586.94 | 617.61 | 613.26 | 590.57 | 590.83 | 581.5041 | 589.5225 | 612.2986 | 613.26 | 610.4722 | 590.83 |
| 82 | 610.89 | 591.53 | 623.95 | 619.24 | 593.89 | 597.02 | 588.898  | 594.1327 | 618.584  | 619.24 | 613.9041 | 597.02 |
| 83 | 614.66 | 596.08 | 626.58 | 621.95 | 597.07 | 601.28 | 592.5322 | 598.7028 | 621.1914 | 621.95 | 617.1913 | 601.28 |
| 84 | 617.72 | 600.9  | 633.7  | 628.29 | 604.05 | 604.84 | 595.4821 | 603.544  | 628.2502 | 628.29 | 624.4065 | 604.84 |
| 85 | 625.3  | 607.21 | 637.1  | 631.9  | 604.89 | 612.06 | 602.7892 | 609.8817 | 631.6209 | 631.9  | 625.2748 | 612.06 |
| 86 | 632.14 | 614.6  | 646.94 | 641.86 | 610.65 | 618.1  | 609.383  | 617.3042 | 641.3763 | 641.86 | 631.2289 | 618.1  |
| 87 | 633.24 | 614.98 | 647.76 | 642.77 | 611.04 | 618.82 | 610.4434 | 617.6859 | 642.1893 | 642.77 | 631.632  | 618.82 |

|     |         |         |         |         |         |         |          |          |          |         |          |         |
|-----|---------|---------|---------|---------|---------|---------|----------|----------|----------|---------|----------|---------|
| 88  | 638.19  | 618.97  | 650.52  | 645.68  | 618.4   | 623.45  | 615.2152 | 621.6935 | 644.9255 | 645.68  | 639.2401 | 623.45  |
| 89  | 639.61  | 621.68  | 657.82  | 652.56  | 619.8   | 625.04  | 616.584  | 624.4154 | 652.1627 | 652.56  | 640.6873 | 625.04  |
| 90  | 658.87  | 636.95  | 682.81  | 677.18  | 644.45  | 646.98  | 635.1507 | 639.7526 | 676.9378 | 677.18  | 666.168  | 646.98  |
| 91  | 781.59  | 740.82  | 845.59  | 838.72  | 791.4   | 762.87  | 753.4528 | 744.0796 | 838.3179 | 838.72  | 818.0702 | 762.87  |
| 92  | 817.28  | 778.99  | 852.85  | 845.08  | 799.89  | 809.89  | 787.8579 | 782.4176 | 845.5155 | 845.08  | 826.8463 | 809.89  |
| 93  | 2046.6  | 2031    | 2062    | 2039.87 | 1964.77 | 2015.48 | 1972.922 | 2039.936 | 2044.267 | 2039.87 | 2030.983 | 2015.48 |
| 94  | 2059.95 | 2043.05 | 2074.59 | 2052.41 | 1970.26 | 2030.66 | 1985.792 | 2052.039 | 2056.749 | 2052.41 | 2036.658 | 2030.66 |
| 95  | 2071.2  | 2054.4  | 2085.87 | 2064.52 | 1974.19 | 2040.49 | 1996.637 | 2063.439 | 2067.932 | 2064.52 | 2040.72  | 2040.49 |
| 96  | 2075.53 | 2059.75 | 2106.74 | 2082.47 | 1977.02 | 2044.98 | 2000.811 | 2068.813 | 2088.622 | 2082.47 | 2043.646 | 2044.98 |
| 97  | 2081.39 | 2066.27 | 2109.99 | 2085.91 | 1978.97 | 2050.58 | 2006.46  | 2075.362 | 2091.844 | 2085.91 | 2045.661 | 2050.58 |
| 98  | 2084.68 | 2068.55 | 2113.09 | 2089.03 | 1983.05 | 2052.33 | 2009.632 | 2077.652 | 2094.917 | 2089.03 | 2049.879 | 2052.33 |
| 99  | 2085.41 | 2069.95 | 2116.7  | 2092.3  | 1994.74 | 2054.82 | 2010.335 | 2079.058 | 2098.496 | 2092.3  | 2061.963 | 2054.82 |
| 100 | 2095.71 | 2078.35 | 2125.05 | 2101.33 | 2002.13 | 2063.84 | 2020.264 | 2087.495 | 2106.775 | 2101.33 | 2069.602 | 2063.84 |
| 101 | 2103.87 | 2085.43 | 2135.51 | 2111.18 | 2009.93 | 2072.48 | 2028.131 | 2094.606 | 2117.145 | 2111.18 | 2077.665 | 2072.48 |
| 102 | 2105.37 | 2088.98 | 2137.82 | 2113.17 | 2010.75 | 2073.59 | 2029.577 | 2098.172 | 2119.435 | 2113.17 | 2078.512 | 2073.59 |
| 103 | 2115.44 | 2098.61 | 2150.73 | 2126.71 | 2029.81 | 2085    | 2039.284 | 2107.844 | 2132.234 | 2126.71 | 2098.215 | 2085    |
| 104 | 2125.94 | 2109.94 | 2162.55 | 2137.61 | 2031.26 | 2095.35 | 2049.406 | 2119.224 | 2143.952 | 2137.61 | 2099.713 | 2095.35 |
| 105 | 2135.59 | 2118.08 | 2170.78 | 2146.67 | 2047.74 | 2106.03 | 2058.709 | 2127.4   | 2152.111 | 2146.67 | 2116.749 | 2106.03 |
| 106 | 2139.11 | 2121.79 | 2171.08 | 2146.91 | 2048.01 | 2109.65 | 2062.102 | 2131.126 | 2152.409 | 2146.91 | 2117.028 | 2109.65 |
| 107 | 2186.64 | 2170.38 | 2223.16 | 2198.09 | 2088.06 | 2155.41 | 2107.921 | 2179.93  | 2204.041 | 2198.09 | 2158.428 | 2155.41 |

**A – scaling factor for B3PW91 with TZVP from NIST.** <sup>23</sup>

**B – scaling factor for B3LYP with def2-TZVP.** <sup>24</sup>

**C – scaling factor for BP86 with def2-TZVP.** <sup>24</sup>

**D – scaling factor for  $\omega$ B97x-D with def2-TZVP.** <sup>24</sup>

**Remarks on scaling factors:** Anharmonic oscillation is the divergence of the harmonic oscillator model.<sup>25</sup> Anharmonic oscillations are not included in idealized conditions, such as a spectroscopic DFT calculations. ORCA automatically set all scaling factors for all calculations to 1.00. Therefore, we scaled the results to more closely approximate to the experimental results. Additionally scaling factors can work to decrease systematic errors.<sup>22</sup>

**Tables S19.** All calculated IR intensities (percent transmittance) for all non-zero, non-imaginary vibrational modes. Ma-def2-TZVP, grid 2, tightopt, D4 applied to all except B3PW91. Imaginary frequencies marked with italic n/a.

| Mode | B3PW91   | B3LYP    | $\omega$ B97x | $\omega$ B97x-15 | BP86     | B3LYP15  |
|------|----------|----------|---------------|------------------|----------|----------|
| 6    | 0.001003 | 0.001134 | <i>n/a</i>    | <i>n/a</i>       | 0.001379 | 0.00056  |
| 7    | 0.000084 | 0.000081 | 0.000295      | 0.000185         | 0.000177 | 0.000157 |
| 8    | 0.000135 | 0.000148 | 0.000416      | 0.000427         | 0.00014  | 0.00019  |
| 9    | 0.0003   | 0.000466 | 0.00107       | 0.000964         | 0.000393 | 0.000291 |
| 10   | 0.000031 | 0.000031 | 0.000335      | 0.000265         | 0.000254 | 0.000041 |
| 11   | 0.000088 | 0.000053 | 0.00023       | 0.000227         | 0.000026 | 0.00007  |
| 12   | 0.000228 | 0.000185 | 0.000562      | 0.000466         | 0.000082 | 0.000186 |
| 13   | 0.0001   | 0.000112 | 0.000136      | 0.000142         | 0.000262 | 0.000139 |
| 14   | 0.000157 | 0.000203 | 0.000019      | 0.000018         | 0.000217 | 0.000214 |
| 15   | 0.000145 | 0.000119 | 0.000155      | 0.000136         | 0.000127 | 0.000133 |
| 16   | 0.000207 | 0.000407 | 0.000012      | 0.000008         | 0.00003  | 0.00015  |
| 17   | 0.000048 | 0.000211 | 0.000389      | 0.000376         | 0.000098 | 0.000204 |
| 18   | 0.000273 | 0.000078 | 0.00064       | 0.000563         | 0.000218 | 0.000043 |
| 19   | 0.000147 | 0.000385 | 0.000122      | 0.000112         | 0.000115 | 0.000369 |
| 20   | 0.000199 | 0.000188 | 0.000179      | 0.000131         | 0.000036 | 0.000193 |
| 21   | 0.00045  | 0.000104 | 0.000631      | 0.000593         | 0.000154 | 0.000101 |
| 22   | 0.000286 | 0.000155 | 0.000095      | 0.000081         | 0.000059 | 0.000087 |
| 23   | 0.000024 | 0.000107 | 0.000535      | 0.000477         | 0.000085 | 0.000123 |
| 24   | 0.000057 | 0.000225 | 0.000077      | 0.000089         | 0.000013 | 0.000159 |
| 25   | 0.000044 | 0.000241 | 0.000596      | 0.000506         | 0.00011  | 0.000184 |
| 26   | 0.000168 | 0.000232 | 0.000492      | 0.000474         | 0.00011  | 0.000177 |
| 27   | 0.000325 | 0.000082 | 0.000069      | 0.00015          | 0.000129 | 0.00014  |
| 28   | 0.000026 | 0.000021 | 0.00026       | 0.000267         | 0.000126 | 0.000058 |
| 29   | 0.000302 | 0.000135 | 0.000132      | 0.000133         | 0.000018 | 0.000077 |
| 30   | 0.000039 | 0.000113 | 0.000014      | 0.000012         | 0.00009  | 0.000122 |
| 31   | 0.000164 | 0.000068 | 0.000102      | 0.000095         | 0.000095 | 0.000062 |
| 32   | 0.00006  | 0.000119 | 0.000076      | 0.000076         | 0.000116 | 0.00008  |
| 33   | 0.000043 | 0.000048 | 0.000109      | 0.0001           | 0.000109 | 0.000048 |
| 34   | 0.000039 | 0.000011 | 0.00007       | 0.000061         | 0.000088 | 0.000013 |
| 35   | 0.000059 | 0.000126 | 0.000145      | 0.000125         | 0.000344 | 0.000066 |
| 36   | 0.000089 | 0.000367 | 0.000583      | 0.000369         | 0.000096 | 0.000333 |
| 37   | 0.000242 | 0.000012 | 0.000361      | 0.000507         | 0.000275 | 0.000008 |
| 38   | 0.000033 | 0.000046 | 0.000071      | 0.000067         | 0.00018  | 0.000024 |
| 39   | 0.000321 | 0.000449 | 0.0015        | 0.001287         | 0.000178 | 0.000326 |
| 40   | 0.00022  | 0.000449 | 0.000338      | 0.000308         | 0.000017 | 0.000214 |
| 41   | 0.004037 | 0.003925 | 0.005603      | 0.004643         | 0.001074 | 0.003527 |
| 42   | 0.000061 | 0.000069 | 0.005311      | 0.005548         | 0.002784 | 0.000076 |
| 43   | 0.004495 | 0.004678 | 0.00296       | 0.002986         | 0.001653 | 0.003858 |
| 44   | 0.000014 | 0.000017 | 0.00002       | 0.000018         | 0.000042 | 0.000023 |

|    |          |          |          |          |          |          |
|----|----------|----------|----------|----------|----------|----------|
| 45 | 0.000548 | 0.0005   | 0.000246 | 0.000236 | 0.000182 | 0.000455 |
| 46 | 0.00037  | 0.00043  | 0.001224 | 0.001152 | 0.000211 | 0.000377 |
| 47 | 0.000393 | 0.000255 | 0.000338 | 0.000373 | 0.000222 | 0.00041  |
| 48 | 0.000361 | 0.000487 | 0.000346 | 0.000292 | 0.000728 | 0.000363 |
| 49 | 0.00007  | 0.000288 | 0.000447 | 0.000432 | 0.000855 | 0.000301 |
| 50 | 0.000109 | 0.000036 | 0.000232 | 0.000212 | 0.000852 | 0.000018 |
| 51 | 0.000208 | 0.000078 | 0.000178 | 0.000156 | 0.000238 | 0.000074 |
| 52 | 0.000069 | 0.000009 | 0.000512 | 0.000426 | 0.000494 | 0.000021 |
| 53 | 0.000336 | 0.00037  | 0.000049 | 0.000123 | 0.000677 | 0.000436 |
| 54 | 0.000255 | 0.000164 | 0.000891 | 0.000882 | 0.000794 | 0.000214 |
| 55 | 0.000382 | 0.000464 | 0.000332 | 0.000322 | 0.000499 | 0.000401 |
| 56 | 0.000263 | 0.000396 | 0.000121 | 0.000142 | 0.000033 | 0.000542 |
| 57 | 0.000111 | 0.000062 | 0.00008  | 0.000048 | 0.000216 | 0.000109 |
| 58 | 0.000235 | 0.000253 | 0.000137 | 0.000118 | 0.000291 | 0.000374 |
| 59 | 0.000107 | 0.000139 | 0.000008 | 0.000006 | 0.000364 | 0.00013  |
| 60 | 0.000682 | 0.000491 | 0.000948 | 0.000832 | 0.000343 | 0.000631 |
| 61 | 0.000115 | 0.000255 | 0.000549 | 0.000421 | 0.00013  | 0.000082 |
| 62 | 0.000221 | 0.00026  | 0.00019  | 0.000223 | 0.000132 | 0.000147 |
| 63 | 0.000767 | 0.000776 | 0.002749 | 0.002677 | 0.001142 | 0.000543 |
| 64 | 0.001108 | 0.001372 | 0.002291 | 0.002238 | 0.000229 | 0.00081  |
| 65 | 0.000815 | 0.002068 | 0.003308 | 0.002939 | 0.000374 | 0.000767 |
| 66 | 0.002487 | 0.001735 | 0.001722 | 0.001842 | 0.000894 | 0.002397 |
| 67 | 0.001497 | 0.001493 | 0.002851 | 0.002636 | 0.000318 | 0.001072 |
| 68 | 0.000614 | 0.001453 | 0.000773 | 0.000831 | 0.000481 | 0.000812 |
| 69 | 0.000599 | 0.000872 | 0.001916 | 0.001789 | 0.000108 | 0.000488 |
| 70 | 0.000237 | 0.000038 | 0.0006   | 0.000547 | 0.000159 | 0.000226 |
| 71 | 0.000394 | 0.000359 | 0.001229 | 0.001207 | 0.000151 | 0.000229 |
| 72 | 0.000322 | 0.000647 | 0.000231 | 0.000218 | 0.000251 | 0.000623 |
| 73 | 0.000498 | 0.000433 | 0.000634 | 0.000585 | 0.000565 | 0.000361 |
| 74 | 0.000264 | 0.000267 | 0.001078 | 0.001077 | 0.000065 | 0.000294 |
| 75 | 0.001437 | 0.001265 | 0.000091 | 0.000132 | 0.000186 | 0.001496 |
| 76 | 0.00726  | 0.008586 | 0.017647 | 0.017488 | 0.009401 | 0.008616 |
| 77 | 0.004799 | 0.008985 | 0.020323 | 0.02023  | 0.012995 | 0.001822 |
| 78 | 0.014516 | 0.008503 | 0.001029 | 0.000979 | 0.010165 | 0.01557  |
| 79 | 0.000777 | 0.000679 | 0.000697 | 0.000529 | 0.003854 | 0.00008  |
| 80 | 0.002211 | 0.003069 | 0.005204 | 0.005121 | 0.000411 | 0.002876 |
| 81 | 0.002211 | 0.001782 | 0.004095 | 0.003985 | 0.001121 | 0.002377 |
| 82 | 0.000585 | 0.000596 | 0.002812 | 0.002382 | 0.000089 | 0.000822 |
| 83 | 0.002951 | 0.002783 | 0.000455 | 0.000483 | 0.000855 | 0.00282  |
| 84 | 0.00404  | 0.005963 | 0.004911 | 0.004209 | 0.004771 | 0.005157 |
| 85 | 0.009897 | 0.010348 | 0.014956 | 0.014996 | 0.00015  | 0.007628 |
| 86 | 0.009839 | 0.01205  | 0.007107 | 0.006539 | 0.004753 | 0.01052  |
| 87 | 0.007459 | 0.009299 | 0.006799 | 0.007098 | 0.002186 | 0.007372 |

|            |          |          |          |          |          |          |
|------------|----------|----------|----------|----------|----------|----------|
| <b>88</b>  | 0.000877 | 0.000606 | 0.002993 | 0.002874 | 0.003018 | 0.001155 |
| <b>89</b>  | 0.014903 | 0.013202 | 0.012714 | 0.012619 | 0.010547 | 0.012332 |
| <b>90</b>  | 0.009738 | 0.010048 | 0.012814 | 0.012533 | 0.009762 | 0.010595 |
| <b>91</b>  | 0.017651 | 0.017476 | 0.017368 | 0.017411 | 0.016336 | 0.01785  |
| <b>92</b>  | 0.017487 | 0.016745 | 0.015431 | 0.01557  | 0.016583 | 0.016805 |
| <b>93</b>  | 0.003172 | 0.00401  | 0.002962 | 0.002909 | 0.001771 | 0.003699 |
| <b>94</b>  | 0.002032 | 0.002075 | 0.005651 | 0.005146 | 0.001079 | 0.001698 |
| <b>95</b>  | 0.003301 | 0.00707  | 0.021081 | 0.019932 | 0.00315  | 0.001532 |
| <b>96</b>  | 0.007292 | 0.004674 | 0.001672 | 0.001671 | 0.009676 | 0.006009 |
| <b>97</b>  | 0.003069 | 0.00295  | 0.010912 | 0.010387 | 0.005851 | 0.00166  |
| <b>98</b>  | 0.001589 | 0.003326 | 0.004339 | 0.00434  | 0.001269 | 0.002898 |
| <b>99</b>  | 0.003384 | 0.002922 | 0.004804 | 0.004456 | 0.001234 | 0.003668 |
| <b>100</b> | 0.008853 | 0.009175 | 0.00108  | 0.00103  | 0.000895 | 0.009151 |
| <b>101</b> | 0.002644 | 0.002819 | 0.006564 | 0.005689 | 0.002204 | 0.002926 |
| <b>102</b> | 0.003416 | 0.00272  | 0.003942 | 0.004265 | 0.002686 | 0.002853 |
| <b>103</b> | 0.002802 | 0.004695 | 0.017507 | 0.015294 | 0.031835 | 0.004253 |
| <b>104</b> | 0.083831 | 0.082829 | 0.078946 | 0.080243 | 0.058645 | 0.083508 |
| <b>105</b> | 0.099411 | 0.100944 | 0.096053 | 0.092745 | 0.077623 | 0.095489 |
| <b>106</b> | 0.100913 | 0.104743 | 0.099227 | 0.103154 | 0.07377  | 0.097767 |
| <b>107</b> | 0.001621 | 0.001651 | 0.001931 | 0.00181  | 0.00063  | 0.001401 |

**Tables S20.** All calculated Raman activities (percent transmittance) for all non-zero, non-imaginary vibrational modes. Ma-def2-TZVP, grid 2, tightopt, D4 applied to all except B3PW91. Imaginary frequencies marked with italic *n/a*.

| Mode | B3LYP    | $\omega$ B97x | $\omega$ B97x-15 | BP86     | B3LYP-15 |
|------|----------|---------------|------------------|----------|----------|
| 6    | 0.176216 | <i>n/a</i>    | <i>n/a</i>       | 0.282479 | 0.153701 |
| 7    | 0.15143  | 0.327633      | 0.311422         | 0.048147 | 0.148803 |
| 8    | 1.098139 | 0.586018      | 0.538247         | 0.335468 | 0.628628 |
| 9    | 0.24546  | 0.467652      | 0.477965         | 0.384555 | 0.730725 |
| 10   | 0.240574 | 0.327215      | 0.319558         | 0.35146  | 0.266207 |
| 11   | 0.139844 | 0.259801      | 0.260735         | 0.178802 | 0.132593 |
| 12   | 0.745729 | 0.71403       | 0.718055         | 0.188485 | 0.608219 |
| 13   | 0.717204 | 0.928776      | 1.029093         | 0.664048 | 0.471862 |
| 14   | 3.946659 | 1.146151      | 0.916158         | 1.697577 | 4.115721 |
| 15   | 1.444325 | 4.453615      | 4.65963          | 1.032351 | 1.137706 |
| 16   | 2.080132 | 4.204025      | 4.338117         | 4.936166 | 3.392228 |
| 17   | 4.189826 | 2.239847      | 2.100564         | 2.142669 | 4.995783 |
| 18   | 7.866597 | 3.681069      | 4.070464         | 7.79089  | 7.868537 |
| 19   | 1.3018   | 2.442249      | 2.662015         | 3.655069 | 1.030279 |
| 20   | 4.578563 | 2.353711      | 3.179623         | 5.824298 | 4.17209  |
| 21   | 1.202415 | 6.886012      | 6.272332         | 7.200418 | 1.02143  |
| 22   | 2.931583 | 4.913799      | 3.945683         | 1.953026 | 4.587912 |
| 23   | 5.460906 | 3.02724       | 3.4519           | 2.55086  | 4.327806 |
| 24   | 4.05861  | 5.809498      | 6.016242         | 2.184414 | 3.406827 |
| 25   | 3.636349 | 5.285242      | 5.786496         | 4.470192 | 1.935859 |
| 26   | 1.612097 | 2.298231      | 2.296194         | 3.425992 | 1.474873 |
| 27   | 6.496945 | 2.244195      | 1.926735         | 0.8814   | 7.638364 |
| 28   | 2.424875 | 2.835662      | 2.904103         | 1.717589 | 1.877443 |
| 29   | 4.014709 | 1.783638      | 1.86767          | 4.757107 | 4.015397 |
| 30   | 2.277886 | 1.666881      | 1.600766         | 0.382866 | 1.897154 |
| 31   | 5.191049 | 0.560808      | 0.468501         | 6.842987 | 4.761109 |
| 32   | 2.640287 | 6.837587      | 6.937011         | 1.485066 | 2.91108  |
| 33   | 2.298961 | 2.982003      | 2.920186         | 1.522134 | 2.317425 |
| 34   | 1.640047 | 1.598534      | 1.751783         | 2.942624 | 1.698485 |
| 35   | 1.089328 | 0.263971      | 0.093883         | 0.968785 | 0.82187  |
| 36   | 2.133042 | 5.18157       | 5.011703         | 4.103099 | 1.741839 |
| 37   | 3.286286 | 1.163344      | 1.163897         | 2.25735  | 4.200441 |
| 38   | 2.106432 | 4.164112      | 4.146477         | 2.522436 | 1.800815 |
| 39   | 6.987468 | 6.322767      | 6.304474         | 5.406282 | 6.248668 |
| 40   | 13.99118 | 14.93679      | 15.2361          | 10.87297 | 13.61914 |
| 41   | 6.636256 | 4.874733      | 5.807128         | 3.270568 | 5.712667 |
| 42   | 10.21458 | 9.328082      | 8.570398         | 3.666059 | 8.022838 |
| 43   | 4.07371  | 13.962        | 13.23717         | 3.680481 | 3.895836 |
| 44   | 85.07911 | 94.90086      | 94.76561         | 66.0122  | 79.19778 |

|    |          |          |          |          |          |
|----|----------|----------|----------|----------|----------|
| 45 | 1.808944 | 0.812575 | 0.67953  | 0.693276 | 1.563165 |
| 46 | 1.597282 | 5.747291 | 5.6597   | 0.667735 | 0.995937 |
| 47 | 0.816692 | 1.506938 | 0.892403 | 0.158822 | 0.852664 |
| 48 | 2.045345 | 1.275931 | 1.564889 | 0.833549 | 1.377114 |
| 49 | 0.725942 | 1.837671 | 1.932899 | 0.302694 | 0.594647 |
| 50 | 1.060933 | 2.422956 | 1.898661 | 0.256543 | 0.778895 |
| 51 | 1.050036 | 1.924796 | 1.858885 | 0.90459  | 0.895233 |
| 52 | 0.192534 | 0.584824 | 1.721632 | 0.073979 | 0.121103 |
| 53 | 0.707166 | 4.183473 | 2.603457 | 0.134169 | 0.663408 |
| 54 | 0.351931 | 0.894006 | 0.816191 | 0.205318 | 0.307281 |
| 55 | 1.349383 | 1.12919  | 1.143171 | 0.938786 | 1.099444 |
| 56 | 0.33805  | 0.705884 | 0.648292 | 0.332428 | 0.185546 |
| 57 | 2.243756 | 0.52383  | 0.524658 | 1.865836 | 2.272203 |
| 58 | 0.80436  | 1.082442 | 1.028035 | 2.566517 | 1.032995 |
| 59 | 1.420946 | 1.047671 | 1.089897 | 3.131426 | 1.804154 |
| 60 | 1.661444 | 2.480045 | 2.239959 | 3.414046 | 1.230876 |
| 61 | 1.677395 | 1.961045 | 1.873745 | 2.237543 | 2.097112 |
| 62 | 0.726806 | 0.757521 | 0.770885 | 2.501376 | 1.140547 |
| 63 | 5.425952 | 3.080748 | 3.447258 | 0.718751 | 4.588246 |
| 64 | 3.99396  | 1.647872 | 1.518829 | 14.50381 | 6.923542 |
| 65 | 2.665139 | 4.285767 | 3.872356 | 0.839257 | 1.764116 |
| 66 | 1.99863  | 2.35302  | 2.292575 | 2.620212 | 1.604973 |
| 67 | 1.808681 | 2.531307 | 2.410009 | 3.28371  | 1.486455 |
| 68 | 4.65987  | 4.307396 | 4.323187 | 3.49683  | 5.818867 |
| 69 | 2.591588 | 5.693706 | 5.171446 | 8.615971 | 1.859736 |
| 70 | 7.081344 | 10.53438 | 9.903068 | 1.664543 | 6.346016 |
| 71 | 5.690785 | 3.438903 | 3.426238 | 1.947479 | 4.764932 |
| 72 | 2.019178 | 10.20209 | 9.372644 | 2.418296 | 2.168409 |
| 73 | 8.140445 | 2.288217 | 2.218973 | 3.451039 | 8.103469 |
| 74 | 6.03957  | 1.85048  | 1.822295 | 9.264881 | 6.684491 |
| 75 | 1.590793 | 5.951283 | 5.831222 | 13.64835 | 1.885365 |
| 76 | 1.276807 | 2.176986 | 1.937711 | 1.004718 | 0.850717 |
| 77 | 1.695156 | 1.373705 | 1.203992 | 0.765835 | 3.788998 |
| 78 | 4.281062 | 3.13681  | 3.189707 | 1.418891 | 1.384161 |
| 79 | 2.4314   | 5.671647 | 5.166149 | 5.116602 | 6.252385 |
| 80 | 2.297356 | 9.151519 | 9.369318 | 1.285327 | 0.490137 |
| 81 | 9.645964 | 3.034958 | 2.793024 | 0.233937 | 4.39766  |
| 82 | 1.76862  | 5.324238 | 4.79582  | 0.123889 | 1.203358 |
| 83 | 1.747947 | 2.165875 | 1.954954 | 0.04306  | 1.000432 |
| 84 | 1.145386 | 2.541083 | 2.396659 | 0.830512 | 0.833727 |
| 85 | 1.740757 | 2.975213 | 2.695267 | 0.306845 | 1.219805 |
| 86 | 0.901855 | 2.445679 | 2.303852 | 0.347396 | 0.887629 |
| 87 | 1.690532 | 2.773657 | 2.764713 | 0.729679 | 1.019474 |

|            |          |          |          |          |          |
|------------|----------|----------|----------|----------|----------|
| <b>88</b>  | 4.26694  | 8.683048 | 8.332621 | 2.482381 | 3.479266 |
| <b>89</b>  | 5.522798 | 10.23958 | 9.995895 | 3.479361 | 4.366286 |
| <b>90</b>  | 2.415568 | 3.892849 | 3.549763 | 0.999575 | 1.917227 |
| <b>91</b>  | 1.440025 | 3.02591  | 2.720665 | 0.425921 | 0.962455 |
| <b>92</b>  | 1.342922 | 5.194031 | 4.602348 | 0.261823 | 0.895333 |
| <b>93</b>  | 67.58339 | 69.04511 | 68.32742 | 32.70585 | 59.19881 |
| <b>94</b>  | 47.08043 | 78.22052 | 75.98881 | 36.14453 | 33.87955 |
| <b>95</b>  | 66.05136 | 154.3699 | 150.178  | 12.54721 | 16.78463 |
| <b>96</b>  | 79.45079 | 40.46625 | 39.91858 | 7.486209 | 103.7986 |
| <b>97</b>  | 64.88878 | 33.37196 | 33.84537 | 23.44197 | 52.82144 |
| <b>98</b>  | 38.08242 | 87.4798  | 75.69418 | 87.64904 | 34.97893 |
| <b>99</b>  | 24.20481 | 90.57292 | 87.09747 | 103.6886 | 33.39237 |
| <b>100</b> | 149.3812 | 96.56172 | 107.4773 | 86.02111 | 139.8359 |
| <b>101</b> | 120.3289 | 160.8581 | 160.3295 | 161.2308 | 121.6342 |
| <b>102</b> | 186.6225 | 193.452  | 194.1098 | 137.3209 | 176.7241 |
| <b>103</b> | 295.6031 | 270.0561 | 277.1899 | 149.7212 | 264.9425 |
| <b>104</b> | 114.1699 | 132.4205 | 131.8485 | 102.6217 | 99.81054 |
| <b>105</b> | 13.61649 | 50.24018 | 63.06752 | 3.954801 | 10.29737 |
| <b>106</b> | 5.979238 | 36.1524  | 13.33951 | 18.67216 | 3.546323 |
| <b>107</b> | 380.5656 | 407.5174 | 416.0725 | 402.3156 | 381.5516 |

**Table S21.** Calculated  $\nu(\text{CO})$  vibrational mode frequencies versus experimental  $\nu(\text{CO})$  ( $\text{cm}^{-1}$ ). Scaling factors are tabulated in **Table S15**. Ma-def2-TZVP, grid 2, tightopt, D4 applied to all except B3PW91. Experimental data from Kuppuswamy *et al.*, of a solid crystalline sample (details in reference). Full experimental FT-IR spectrum plotted in **Figure S18** of Kuppuswamy *et al.*<sup>1</sup>

|      | Calculated $\nu(\text{CO})$ Frequencies ( $\text{cm}^{-1}$ ); Unscaled |         |                     |                        |         |          | Calculated $\nu(\text{CO})$ Frequencies ( $\text{cm}^{-1}$ ); Scaled |          |                     |                        |          |          | FT-IR Data<br>( $\text{cm}^{-1}$ ) |
|------|------------------------------------------------------------------------|---------|---------------------|------------------------|---------|----------|----------------------------------------------------------------------|----------|---------------------|------------------------|----------|----------|------------------------------------|
| Mode | B3PW91                                                                 | B3LYP   | $\omega\text{B97x}$ | $\omega\text{B97x-15}$ | BP86    | B3LYP-15 | B3PW91                                                               | B3LYP    | $\omega\text{B97x}$ | $\omega\text{B97x-15}$ | BP86     | B3LYP-15 | 1945,<br>1975,<br>2015,<br>2100    |
| 93   | 2046.6                                                                 | 2031    | 2062                | 2039.87                | 1964.77 | 2015.48  | 1972.922                                                             | 2039.936 | 2044.267            | 2039.87                | 2030.983 | 2015.48  |                                    |
| 94   | 2059.95                                                                | 2043.05 | 2074.59             | 2052.41                | 1970.26 | 2030.66  | 1985.792                                                             | 2052.039 | 2056.749            | 2052.41                | 2036.658 | 2030.66  |                                    |
| 95   | 2071.2                                                                 | 2054.4  | 2085.87             | 2064.52                | 1974.19 | 2040.49  | 1996.637                                                             | 2063.439 | 2067.932            | 2064.52                | 2040.72  | 2040.49  |                                    |
| 96   | 2075.53                                                                | 2059.75 | 2106.74             | 2082.47                | 1977.02 | 2044.98  | 2000.811                                                             | 2068.813 | 2088.622            | 2082.47                | 2043.646 | 2044.98  |                                    |
| 97   | 2081.39                                                                | 2066.27 | 2109.99             | 2085.91                | 1978.97 | 2050.58  | 2006.46                                                              | 2075.362 | 2091.844            | 2085.91                | 2045.661 | 2050.58  |                                    |
| 98   | 2084.68                                                                | 2068.55 | 2113.09             | 2089.03                | 1983.05 | 2052.33  | 2009.632                                                             | 2077.652 | 2094.917            | 2089.03                | 2049.879 | 2052.33  |                                    |
| 99   | 2085.41                                                                | 2069.95 | 2116.7              | 2092.3                 | 1994.74 | 2054.82  | 2010.335                                                             | 2079.058 | 2098.496            | 2092.3                 | 2061.963 | 2054.82  |                                    |
| 100  | 2095.71                                                                | 2078.35 | 2125.05             | 2101.33                | 2002.13 | 2063.84  | 2020.264                                                             | 2087.495 | 2106.775            | 2101.33                | 2069.602 | 2063.84  |                                    |
| 101  | 2103.87                                                                | 2085.43 | 2135.51             | 2111.18                | 2009.93 | 2072.48  | 2028.131                                                             | 2094.606 | 2117.145            | 2111.18                | 2077.665 | 2072.48  |                                    |
| 102  | 2105.37                                                                | 2088.98 | 2137.82             | 2113.17                | 2010.75 | 2073.59  | 2029.577                                                             | 2098.172 | 2119.435            | 2113.17                | 2078.512 | 2073.59  |                                    |
| 103  | 2115.44                                                                | 2098.61 | 2150.73             | 2126.71                | 2029.81 | 2085     | 2039.284                                                             | 2107.844 | 2132.234            | 2126.71                | 2098.215 | 2085     |                                    |
| 104  | 2125.94                                                                | 2109.94 | 2162.55             | 2137.61                | 2031.26 | 2095.35  | 2049.406                                                             | 2119.224 | 2143.952            | 2137.61                | 2099.713 | 2095.35  |                                    |
| 105  | 2135.59                                                                | 2118.08 | 2170.78             | 2146.67                | 2047.74 | 2106.03  | 2058.709                                                             | 2127.4   | 2152.111            | 2146.67                | 2116.749 | 2106.03  |                                    |
| 106  | 2139.11                                                                | 2121.79 | 2171.08             | 2146.91                | 2048.01 | 2109.65  | 2062.102                                                             | 2131.126 | 2152.409            | 2146.91                | 2117.028 | 2109.65  |                                    |
| 107  | 2186.64                                                                | 2170.38 | 2223.16             | 2198.09                | 2088.06 | 2155.41  | 2107.921                                                             | 2179.93  | 2204.041            | 2198.09                | 2158.428 | 2155.41  |                                    |

**Figures S50-S60 show plotted IR intensities and Raman activities** (no Raman calculated for B3PW91) for each listed functional. Ma-def2-TZVP, grid 2, tightopt, D4 applied to all except B3PW91. Plots were generated in Chemcraft 18.0, with Lorentzian line broadening applied.

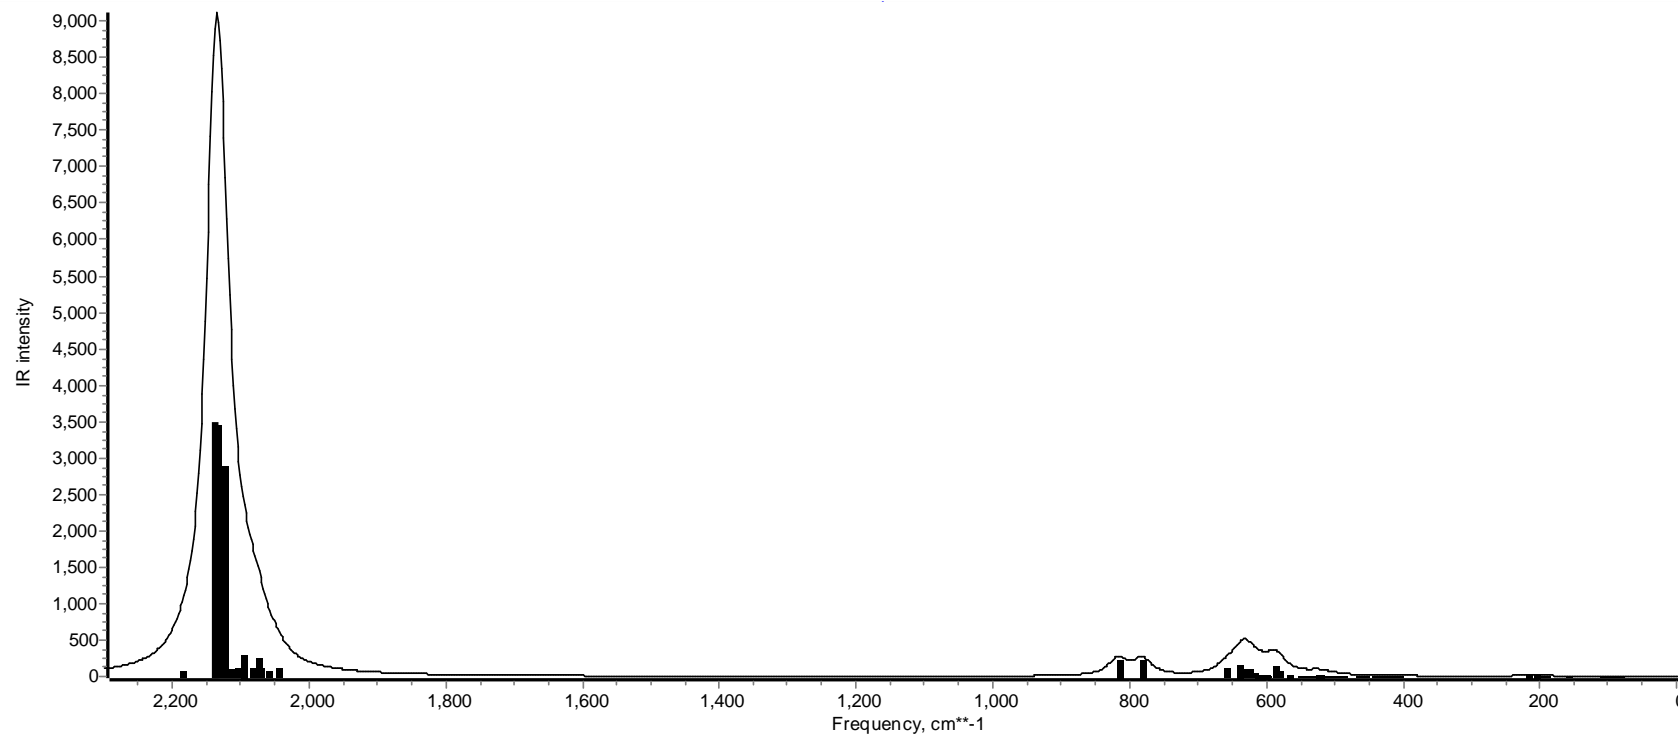

**Figure S50.** B3PW91 IR intensities.

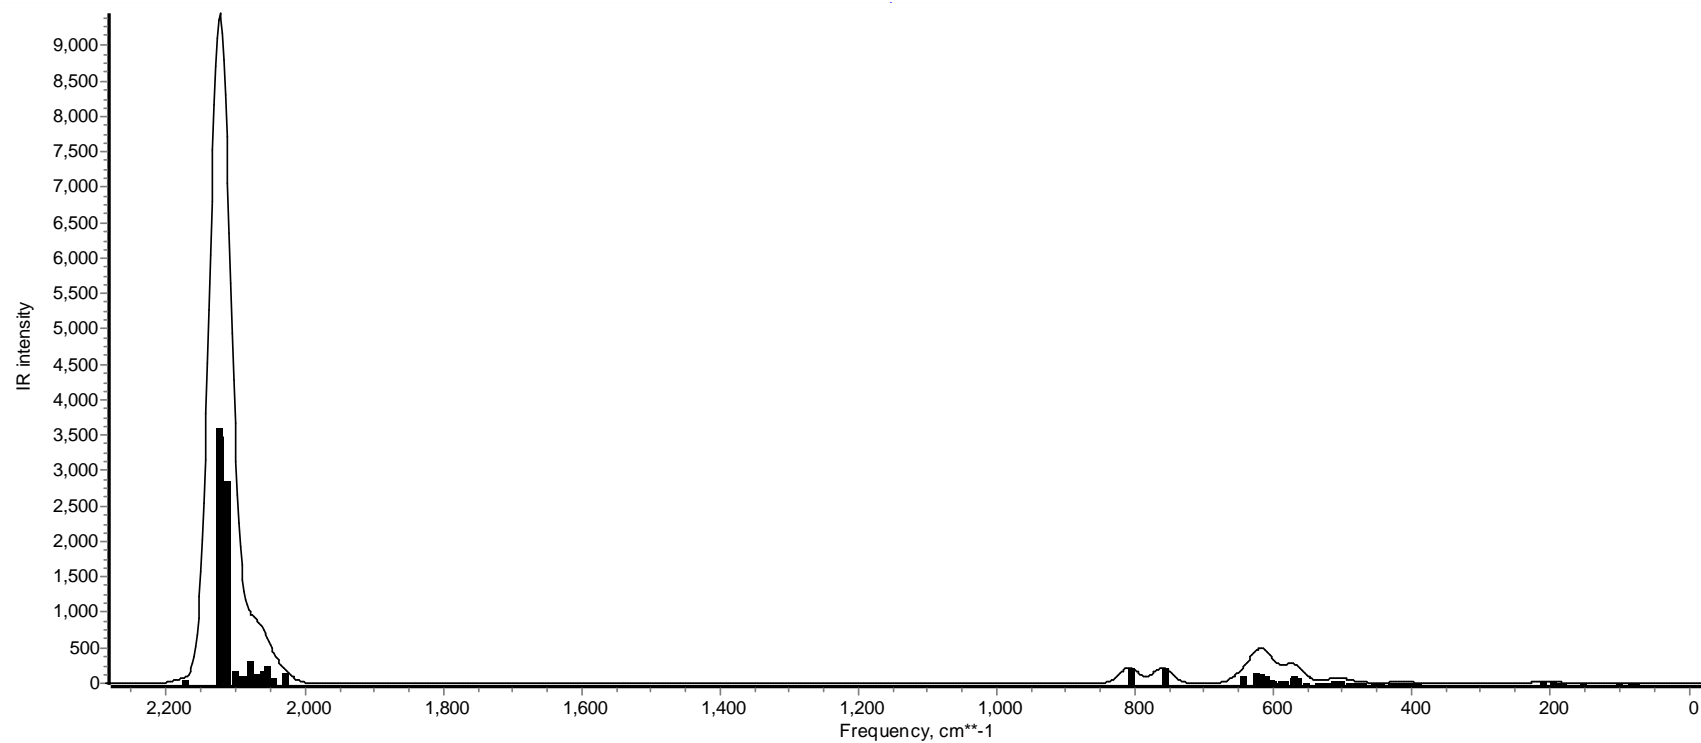

**Figure S51.** B3LYP IR intensities.

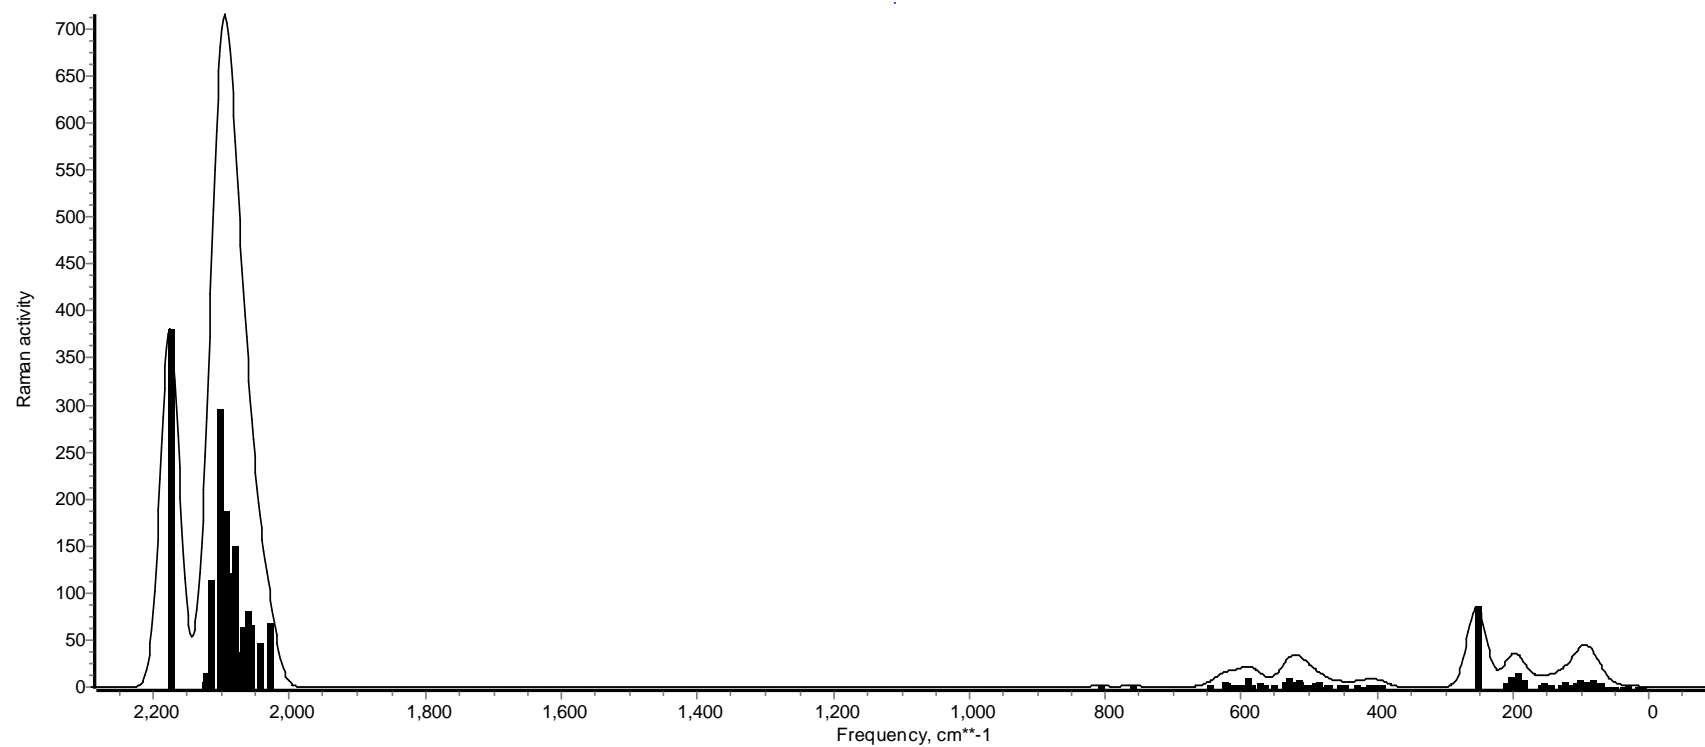

**Figure S52.** B3LYP Raman activities.

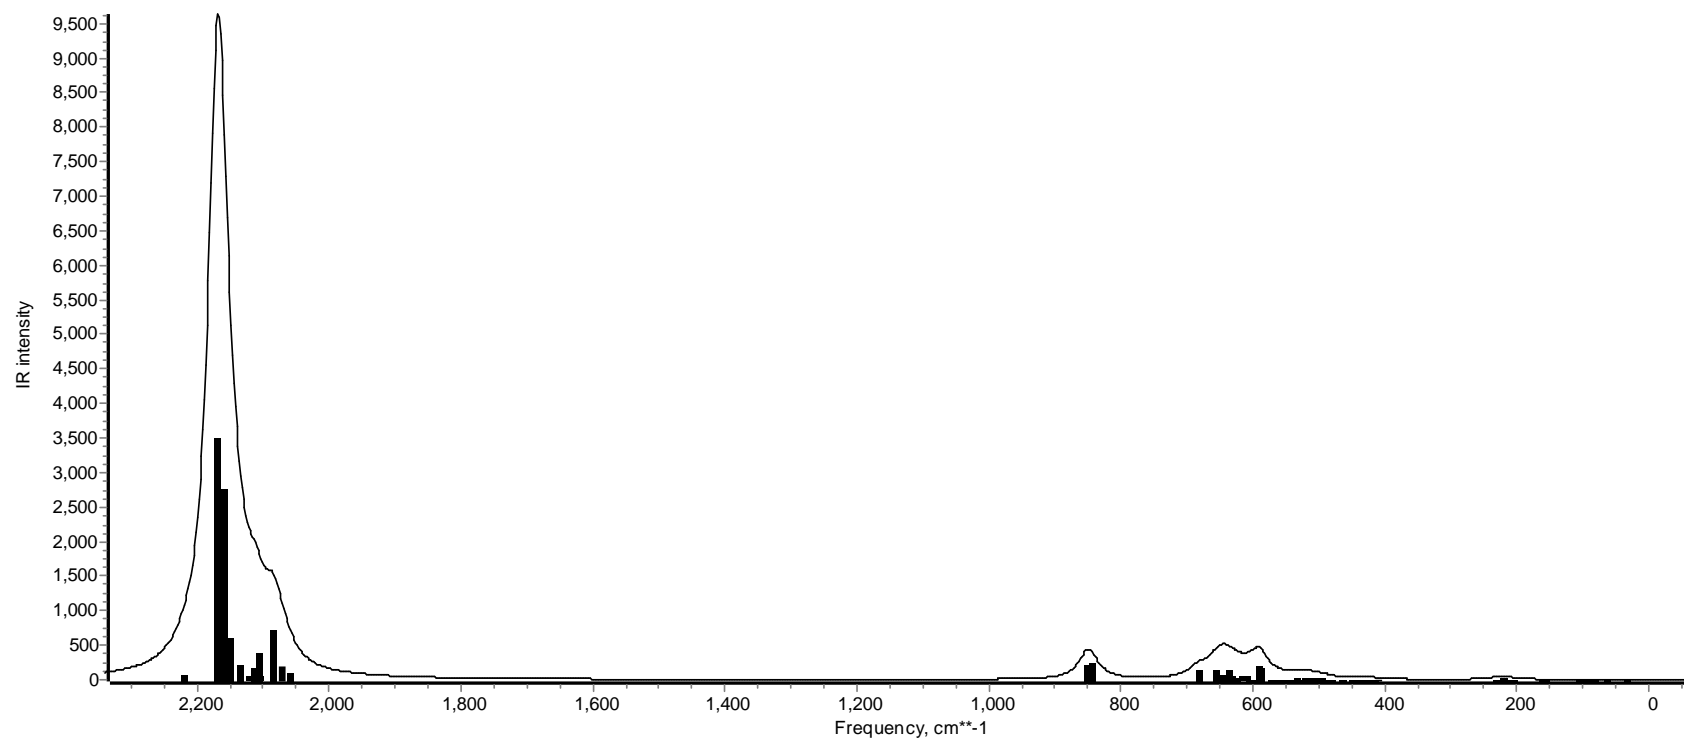

**Figure S53.**  $\omega$ B97x IR intensities

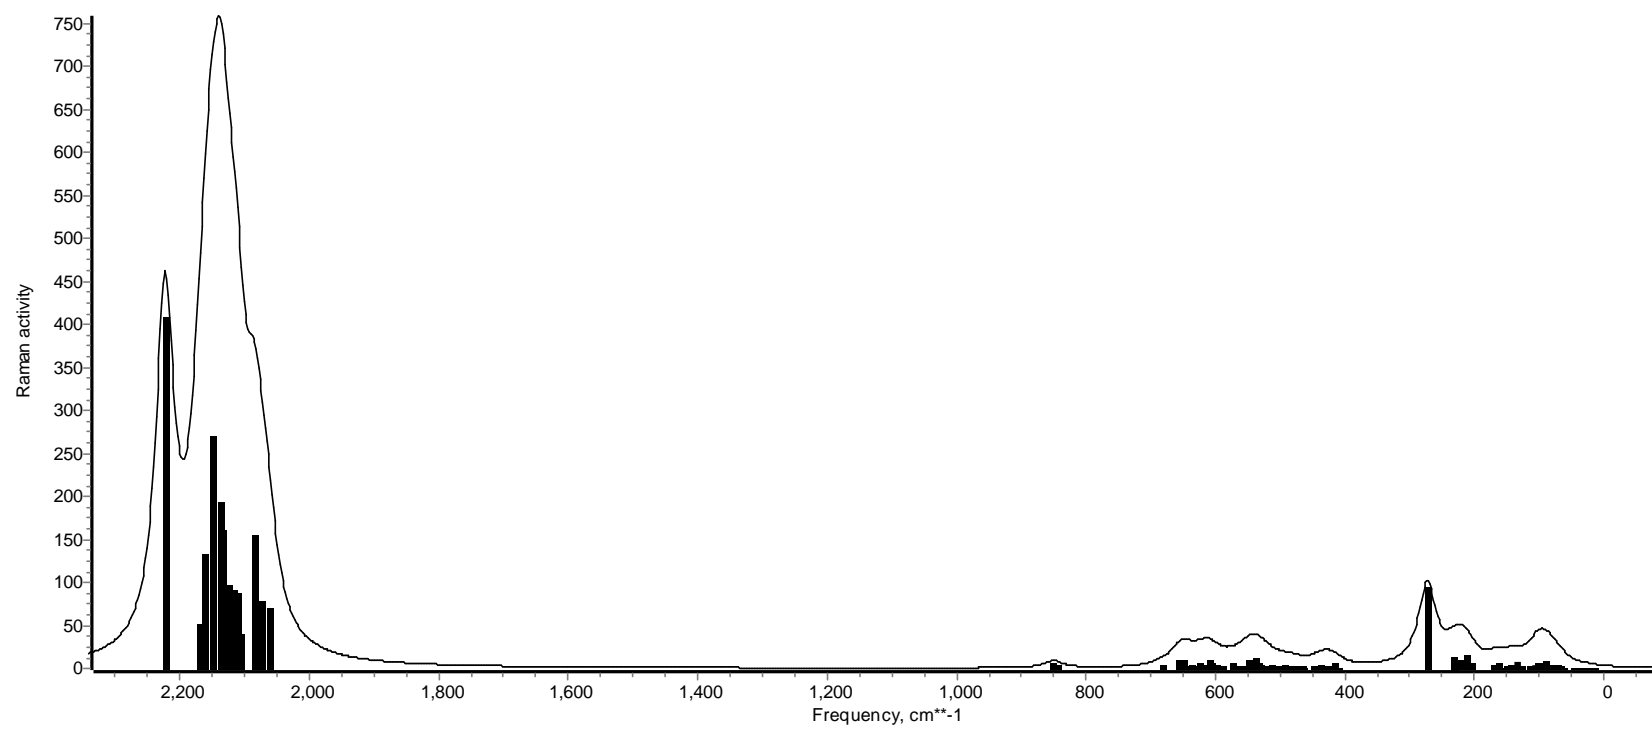

**Figure S54.** ωB97x Raman activities.

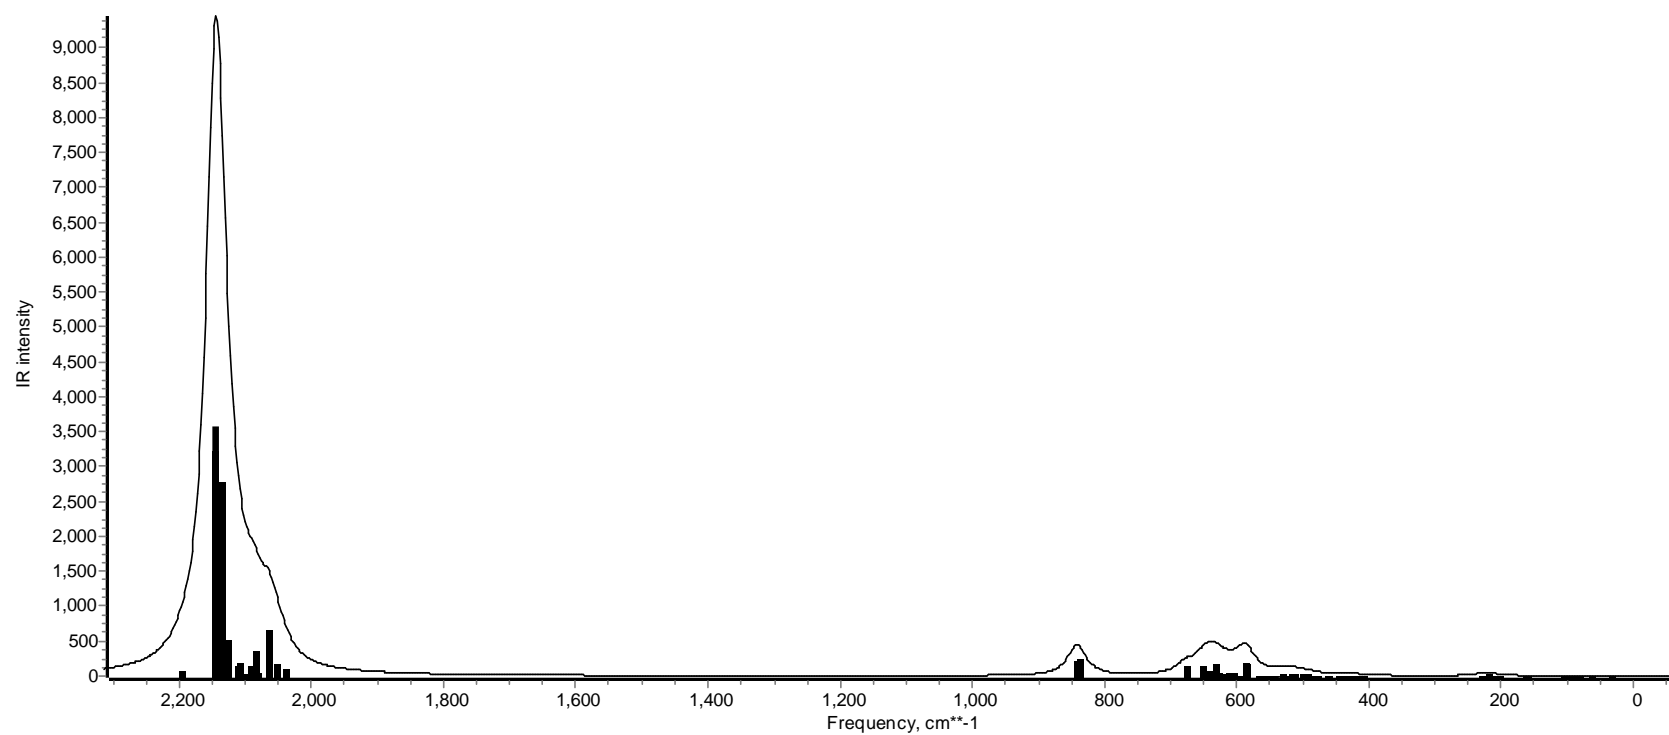

**Figure S55.**  $\omega$ B97x-15 IR intensities

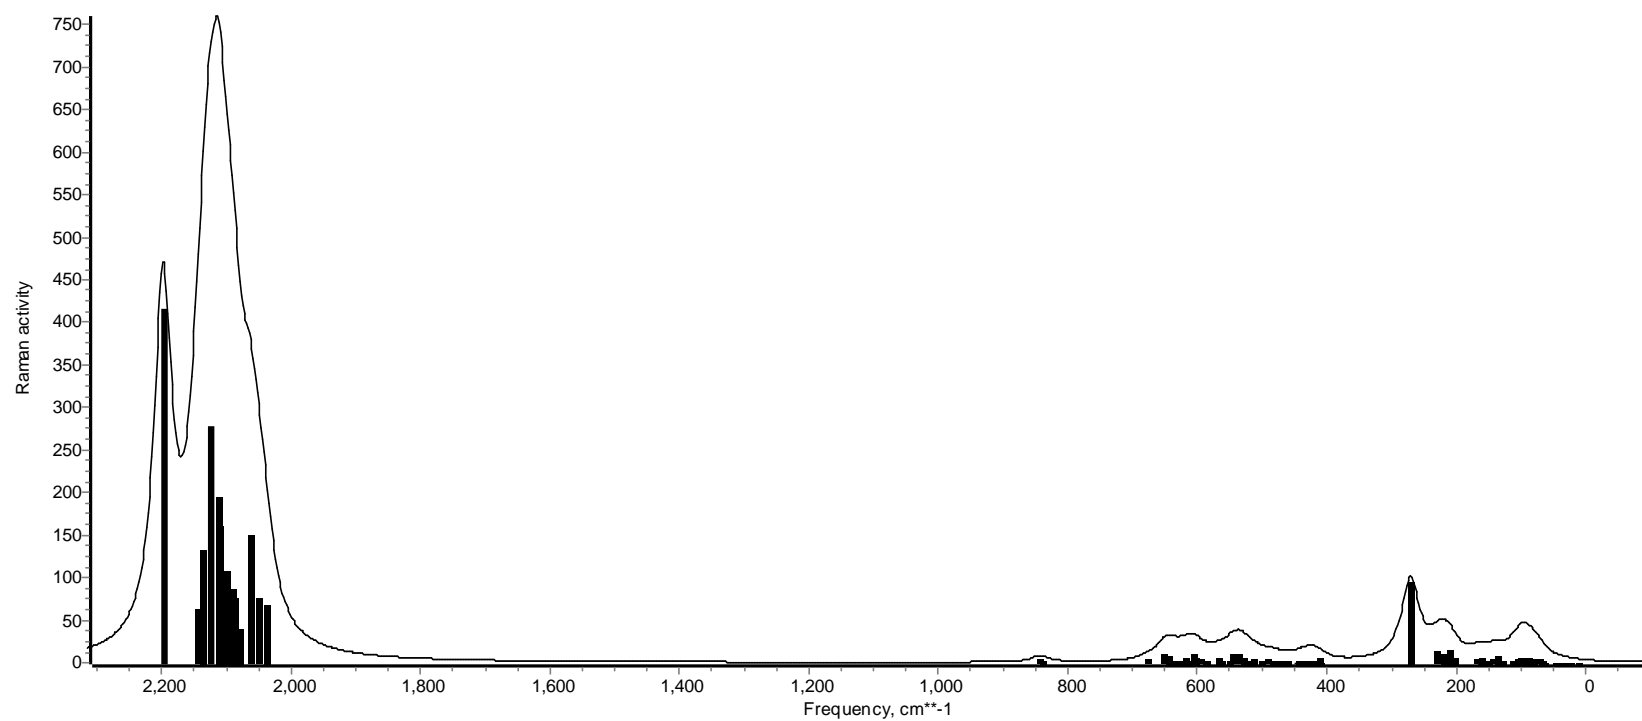

**Figure S56.**  $\omega$ B97x-15 Raman activities.

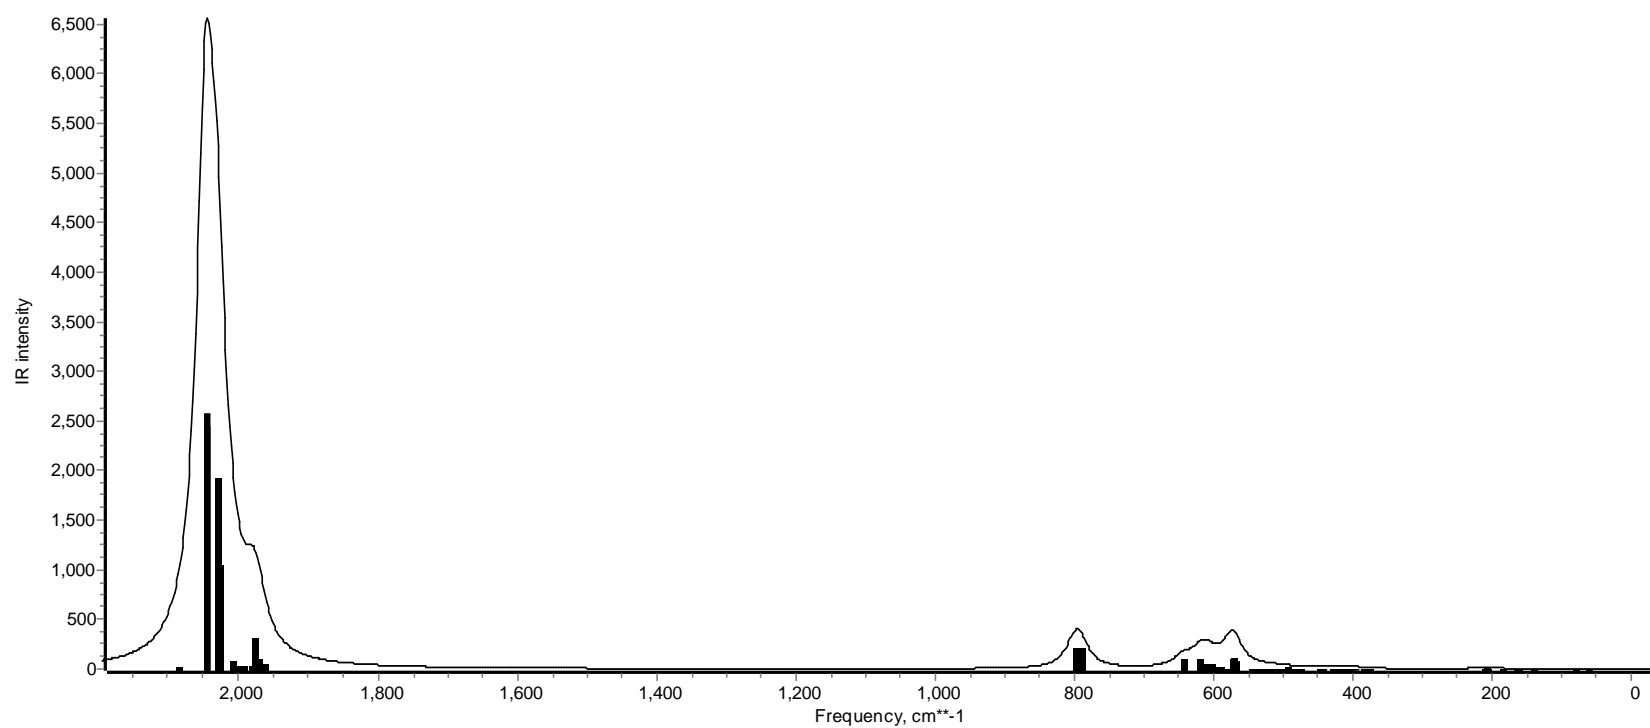

**Figure S57.** BP86 Raman activities.

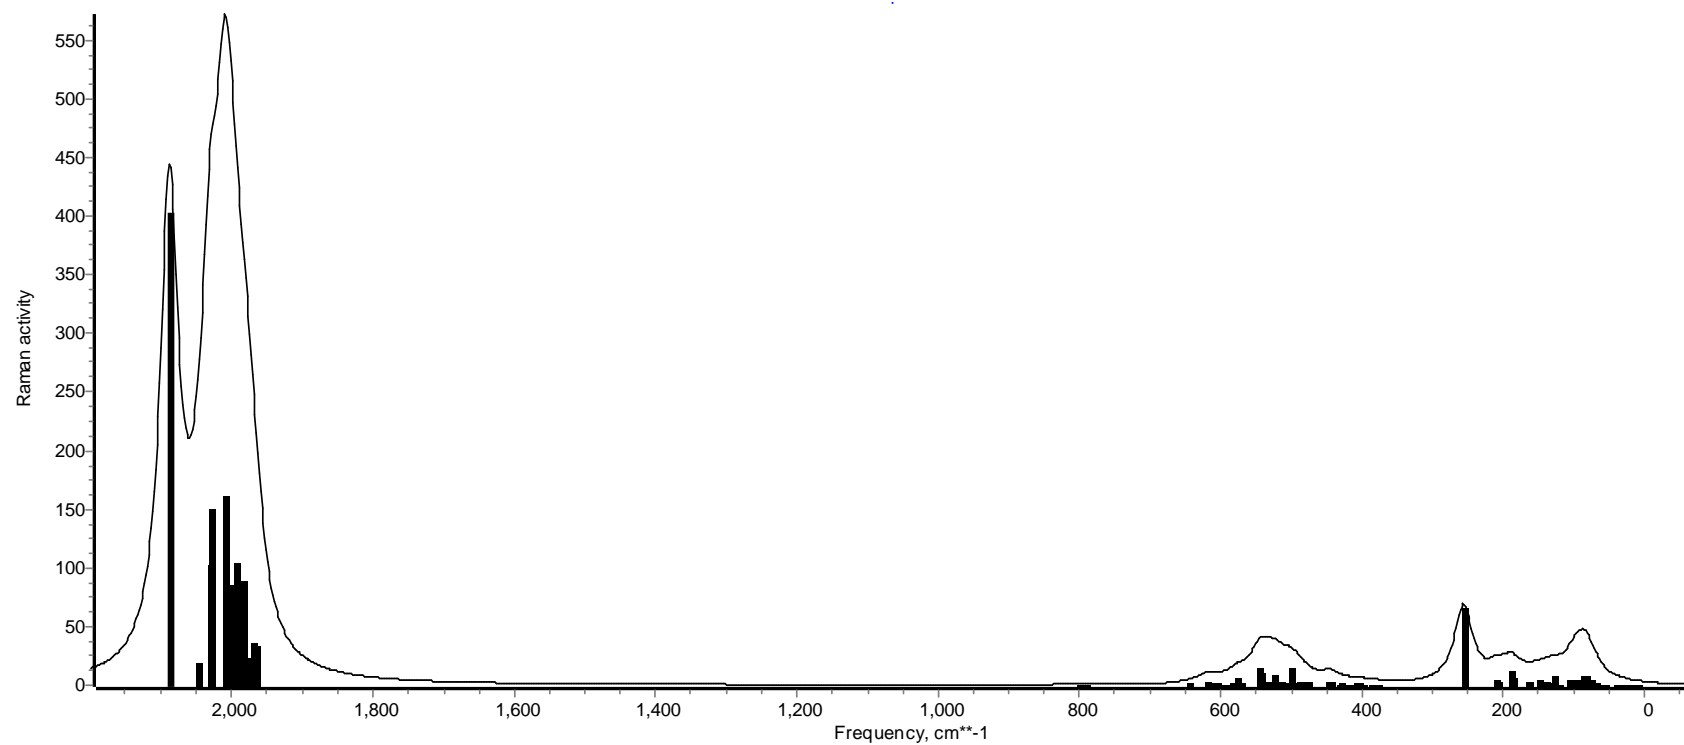

**Figure S58.** BP86 Raman activities.

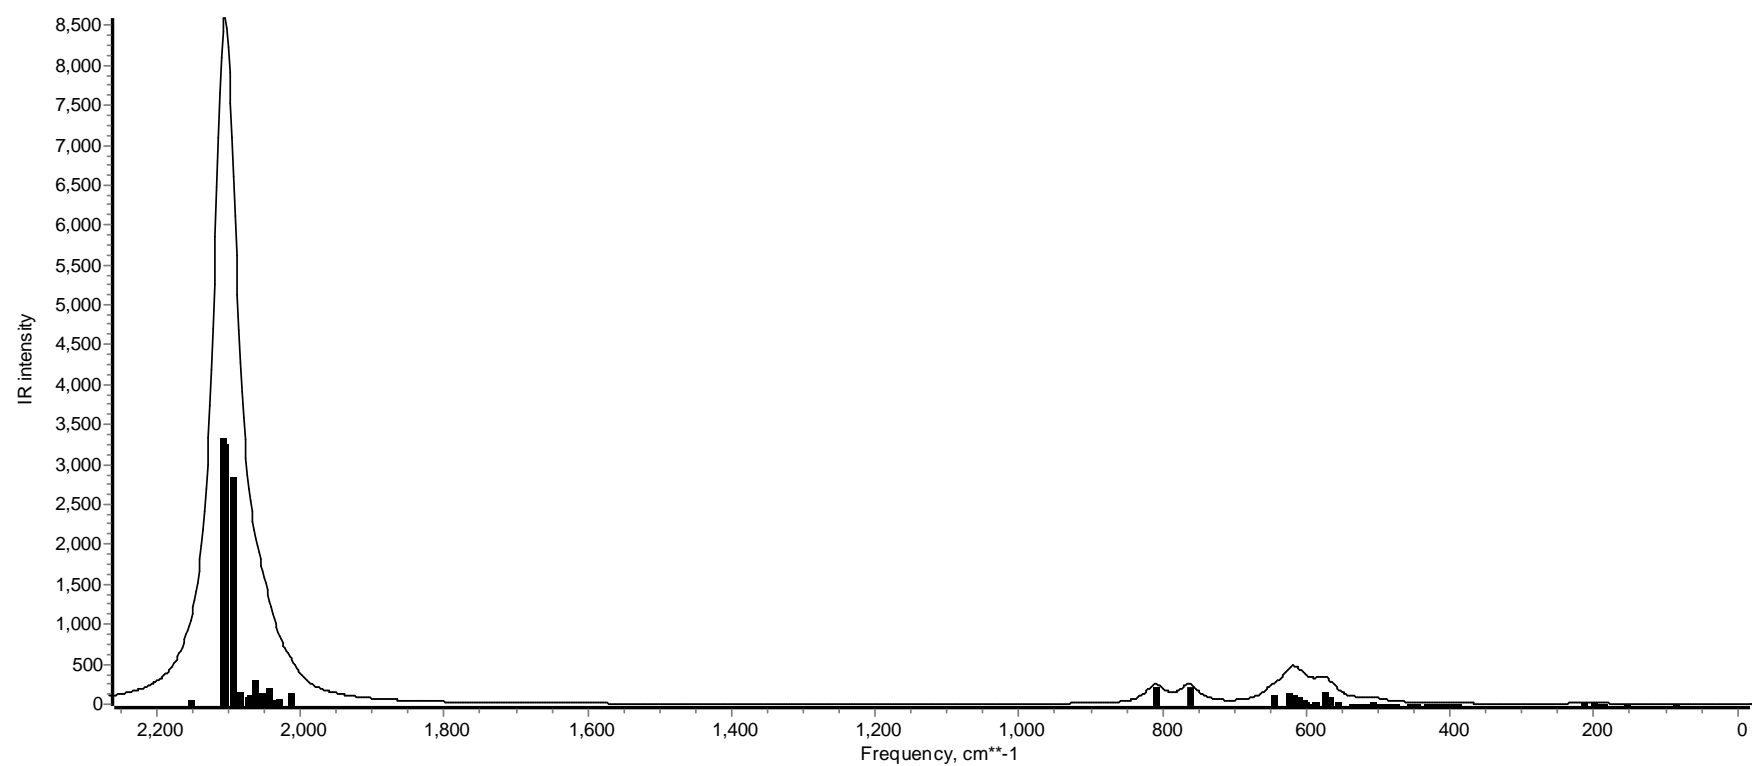

**Figure S59.** B3LYP IR intensities.

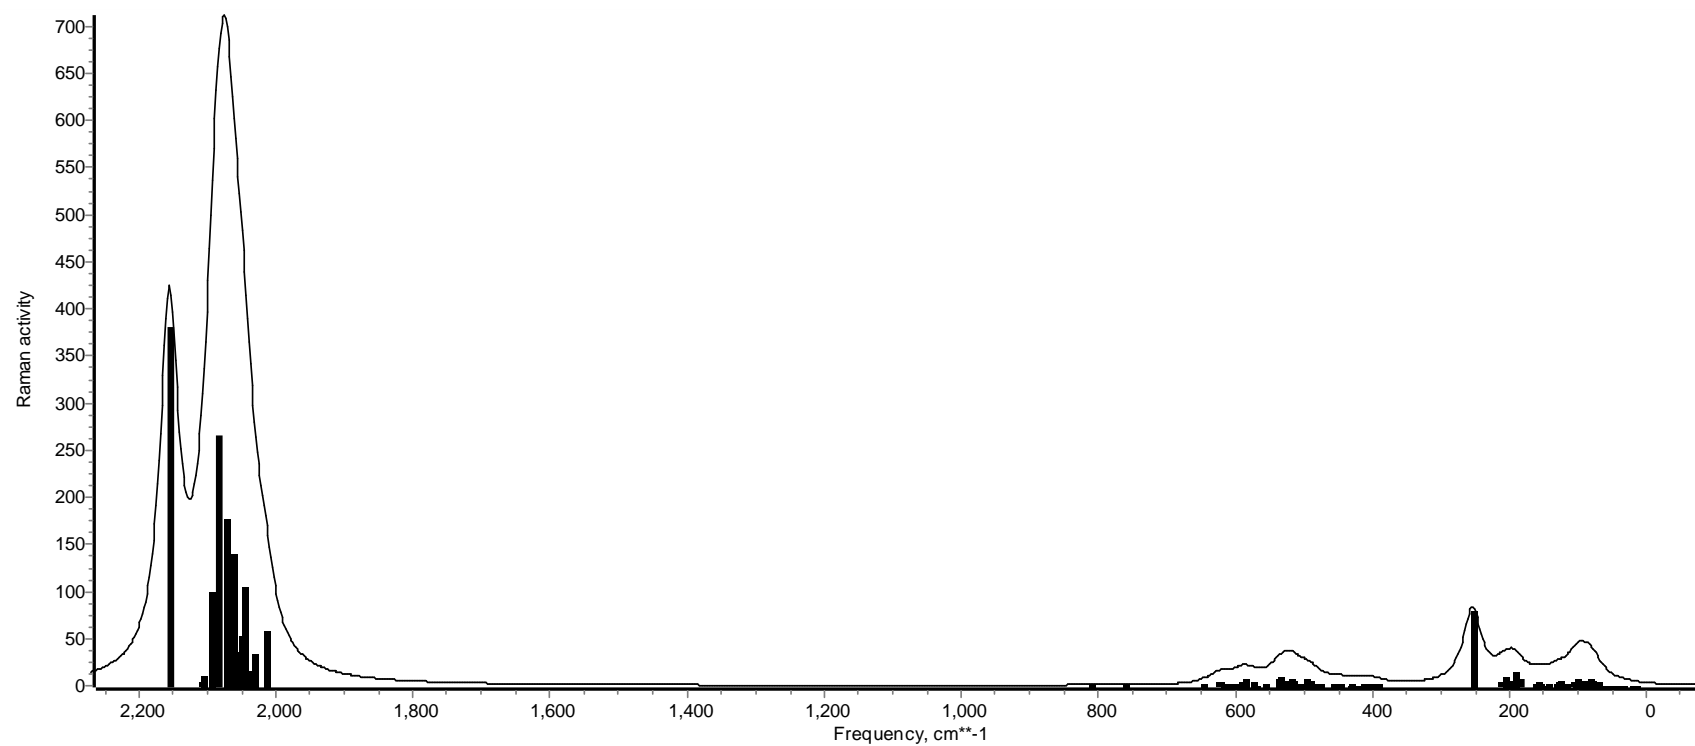

**Figure S60.** B3LYP-15 Raman activities.

**Tables S22.** Results of screening of functionals using  $[\text{Fe}_5(\mu_5\text{-C})(\text{CO})_{15}]$  – calculated single point energies and HOMO-LUMO gaps. ma-def2-TZVP, grid 2, tightopt, D4 applied to all except B3PW91.

|                                   | Final Single Point Energy Eh | HOMO-LUMO gap (eV) |
|-----------------------------------|------------------------------|--------------------|
| <b>B3PW91</b>                     | -8057.042434878665           | 2.887967108        |
| <b>BP86</b>                       | -8059.282600540992           | 1.611198836        |
| <b>B3LYP</b>                      | -8056.662814392064           | 2.751092760        |
| <b><math>\omega</math>B97x</b>    | -8057.871214051423           | 7.240734644        |
| <b>B3LYP-15</b>                   | -8054.999929988311           | 2.441968984        |
| <b><math>\omega</math>B97X-15</b> | -8049.809906818548           | 7.088077568        |

#### Remarks on HOMO-LUMO gaps and SPE:

HOMO-LUMO gap was very large for  $\omega$ B97X-15 and  $\omega$ B97x, but on scale with reported calculated HOMO-LUMO gaps with these functionals when applied to Fe carbonyl carbide clusters in the literature.<sup>26</sup> The lowest SPE was BP86. Based on these results, no functionals were eliminated entirely but BP86, B3LYP, B3LYP-15, and B3PW91 were preferred.

#### Remarks on computational method screening with $\text{Fe}_5(\mu_5\text{-C})(\text{CO})_{15}$ .

All applied methods gave reasonable output geometries with low RMSD values (**Table S24**), and core Fe-carbide and Fe-Fe bond lengths consistent with experimental values (**Table S25**). Interestingly, significant variation was observed in the  $\text{Fe}_4$ -plane-carbide displacement varying with functional. However, this variation was not disproportionate to the variation observed among published crystal data sets (0.119<sup>27</sup> versus 0.09 Å, for 1552287 versus the originally published structure by Bryae *et al.*<sup>28</sup>). The vibrational analysis of  $\text{Fe}_5(\mu_5\text{-C})(\text{CO})_{15}$  that was conducted show the calculated IR  $\nu(\text{CO})$  energies occupy a reasonable range for a neutral cluster with terminally bound carbonyl ligands, varying depending on the applied functional and whether or not a scaling factor is applied. The calculated spectra all had no imaginary modes calculated, with the exception of  $\omega$ B97-x and  $\omega$ B97-x-15, which each had one small ( $< 20 \text{ cm}^{-1}$ ) imaginary mode that could not be resolved by increasing grid size or reoptimizing the geometry from distorted coordinated, or to a tighter level of convergence criteria (**Table S12**). The calculated final single point energy was lowest for BP86, varying between functionals used and particularly between  $\omega$ B97-x and  $\omega$ B97-x-15 (Table SX). The calculated HOMO-LUMO gaps varied drastically by functional used, with very large gaps ( $\sim 7 \text{ eV}$ ) calculated for  $\omega$ B97-x and  $\omega$ B97-x-15, and smaller less variable energy gaps for the other functionals (from 1.6 to 2.9 eV). The high HOMO-LUMO value is comparable to reports on iron carbide carbonyl cluster modeling in other studies using  $\omega$ B97-x and  $\omega$ B97-x-15.<sup>26</sup>

From these results, we concluded that all but  $\omega$ B97-x and  $\omega$ B97-x-15 were reasonable functionals for the geometry optimization of the structurally ambiguous compound **2** and proceeded to apply these methodologies. Of these, only the BP86 ma-def2-TZVP-D4 approach gave a converged geometry with only three small (less than  $100 \text{ cm}^{-1}$ ) calculated imaginary frequencies, the details of which are discussed *vide infra*.

We went on to test C-PCM for DCE with BP86 ma-def2-TZVP-D4. Results were distinct from gas phase only in that four of the carbonyls were bridging, as observed in the experimental results for the dianion, rather than all terminal. This was also indicated by the calculated IR. This does not fit experimental results with the five iron neutral cluster.

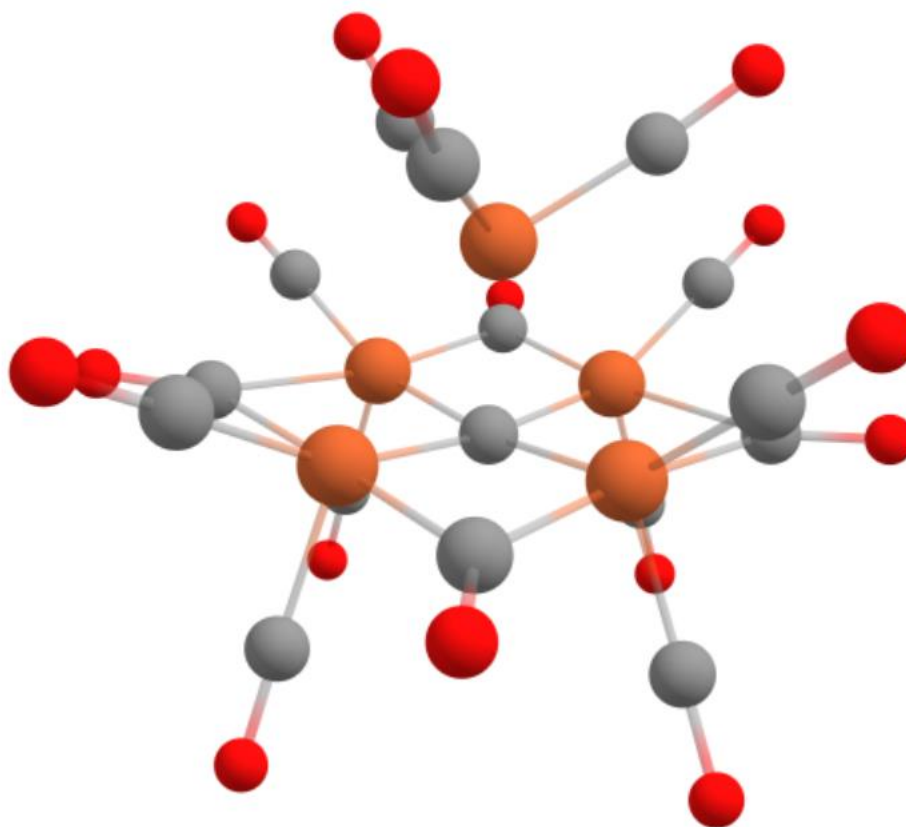

**Figure S61.** Optimized geometry of five-iron neutral cluster with C-PCM for DCE, BP86 ma-def2-TZVP-D4.

**Table S23.** Full IR frequencies for five-iron neutral cluster with C-PCM for DCE, BP86 ma-def2-TZVP-D4, with and without scaling factors. Scaling factor for BP86 with def2-TZVP.<sup>24</sup>

| DCE   | With Scaling Factor |
|-------|---------------------|
| 0     | 0                   |
| 0     | 0                   |
| 0     | 0                   |
| 0     | 0                   |
| 0     | 0                   |
| 0     | 0                   |
| 21.3  | 22.01781            |
| 38.8  | 40.10756            |
| 39.44 | 40.76913            |
| 45.47 | 47.00234            |
| 46.75 | 48.32548            |
| 50.34 | 52.03646            |
| 60.72 | 62.76626            |

|        |          |
|--------|----------|
| 71.11  | 73.50641 |
| 73.6   | 76.08032 |
| 77.94  | 80.56658 |
| 79.67  | 82.35488 |
| 86.19  | 89.0946  |
| 87.19  | 90.1283  |
| 90.86  | 93.92198 |
| 92.07  | 95.17276 |
| 95.46  | 98.677   |
| 96.27  | 99.5143  |
| 98.5   | 101.8195 |
| 99.01  | 102.3466 |
| 100.59 | 103.9799 |
| 101.57 | 104.9929 |
| 103.5  | 106.988  |
| 106.54 | 110.1304 |
| 109.3  | 112.9834 |
| 123.38 | 127.5379 |
| 135.47 | 140.0353 |
| 160.6  | 166.0122 |
| 164.05 | 169.5785 |
| 170.1  | 175.8324 |
| 173.07 | 178.9025 |
| 192.14 | 198.6151 |
| 201.26 | 208.0425 |
| 202.01 | 208.8177 |
| 204.84 | 211.7431 |
| 215.41 | 222.6693 |
| 232.9  | 240.7487 |
| 257.68 | 266.3638 |
| 258.26 | 266.9634 |
| 272.09 | 281.2594 |
| 356.66 | 368.6794 |
| 385.99 | 398.9979 |
| 394.61 | 407.9084 |
| 397.17 | 410.5546 |
| 405.45 | 419.1137 |
| 407.65 | 421.3878 |
| 408.33 | 422.0907 |
| 410.58 | 424.4165 |
| 414.26 | 428.2206 |
| 415.14 | 429.1302 |
| 416.28 | 430.3086 |
| 421.68 | 435.8906 |
| 435.44 | 450.1143 |
| 439.91 | 454.735  |
| 440.9  | 455.7583 |
| 458.76 | 474.2202 |
| 461.3  | 476.8458 |
| 467.32 | 483.0687 |
| 470.48 | 486.3352 |
| 486.11 | 502.4919 |
| 486.89 | 503.2982 |

|         |          |
|---------|----------|
| 495.38  | 512.0743 |
| 498.88  | 515.6923 |
| 504.83  | 521.8428 |
| 507.67  | 524.7785 |
| 522.48  | 540.0876 |
| 529.06  | 546.8893 |
| 530.96  | 548.8534 |
| 534.69  | 552.7091 |
| 536.39  | 554.4663 |
| 548.88  | 567.3773 |
| 550.9   | 569.4653 |
| 554.48  | 573.166  |
| 555.57  | 574.2927 |
| 570.43  | 589.6535 |
| 575.04  | 594.4188 |
| 579.78  | 599.3186 |
| 582.09  | 601.7064 |
| 591.8   | 611.7437 |
| 594.74  | 614.7827 |
| 602.6   | 622.9076 |
| 603.12  | 623.4451 |
| 609.12  | 629.6473 |
| 610.19  | 630.7534 |
| 613.98  | 634.6711 |
| 636.05  | 657.4849 |
| 850.75  | 879.4203 |
| 853.37  | 882.1286 |
| 1872.26 | 1935.355 |
| 1884.12 | 1947.615 |
| 1885.14 | 1948.669 |
| 1907.82 | 1972.114 |
| 1960.82 | 2026.9   |
| 1971.37 | 2037.805 |
| 1996.38 | 2063.658 |
| 2003.01 | 2070.511 |
| 2008.25 | 2075.928 |
| 2010.17 | 2077.913 |
| 2016    | 2083.939 |
| 2035.34 | 2103.931 |
| 2044.26 | 2113.152 |
| 2045.32 | 2114.247 |
| 2097.34 | 2168.02  |

### Remarks on DFT Modeled Geometry of **2**.

All functionals tested on  $[\text{Fe}_5(\mu_5\text{-C})(\text{CO})_{15}]$  were applied to the modeling of **2**. The chosen starting geometry was the crystal data of **1**. Ultimately, the only dataset which converged to an optimized geometry was the one performed with BP86. This result was unsatisfactory, as the frequency analysis afforded three small ( $<100\text{ cm}^{-1}$ ) imaginary modes, visualized as breathing modes involving all the molecule's atoms, which could not be eliminated with increasing the grid size or by displacing the atoms and reconverging. With this persistent result, a set of trial calculations were performed this time with a C-

PCM correction. We had initially judged such a correction to be an unnecessary added computational cost given:

- 1) the success of the gas phase calculations with  $[\text{Fe}_5(\mu_5\text{-C})(\text{CO})_{15}]$ , and
  - 2) the fact that the tested clusters are all neutral, not charged, unlike other computationally modeled iron-carbonyl-carbide clusters in the literature that were conducted with a C-PCM correction.<sup>26,29</sup>
- A range of dielectric constants were tested on **2**, with no other modifications to the calculation parameters, but this had no significant impact on results, all of which gave essentially equivalent geometries to the gas phase result, apart from small reductions in the magnitude of the imaginary frequencies (**Table S22**.) We have preliminary results that suggest that the application of C-PCM allows for convergence with a wider range of functionals and basis sets when modeling cluster **2**. We will continue to explore this in future studies.

**Table S24.** RMSD values of gas-phase versus solvated models of **2** by tested dielectric constant.

| Solvent / dielectric constant | RMSD of structure coordinates compared with the gas-phase result |
|-------------------------------|------------------------------------------------------------------|
| Acetonitrile (36.6)           | 0.0217554032585826                                               |
| Dichloroethane (9.08)         | 0.0117467667068557                                               |
| Tetrahydrofuran (7.25)        | 0.0178716128334861                                               |
| Toluene (2.4)                 | 0.0114888118646329                                               |

**Tables S25.** Full calculated IR frequencies of **2**, with and without scaling factors. Scaling factor for BP86 with def2-TZVP.<sup>24</sup>

| No scaling factor |        |        |        |         | Scaling Factor Applied |          |          |          |          |
|-------------------|--------|--------|--------|---------|------------------------|----------|----------|----------|----------|
| Gas-Phase         | MeCN   | DCE    | THF    | Toluene | Gas-Phase              | MeCN     | DCE      | THF      | Toluene  |
| 0                 | 0      | 0      | 0      | 0       | 0                      | 0        | 0        | 0        | 0        |
| 0                 | 0      | 0      | 0      | 0       | 0                      | 0        | 0        | 0        | 0        |
| 0                 | 0      | 0      | 0      | 0       | 0                      | 0        | 0        | 0        | 0        |
| 0                 | 0      | 0      | 0      | 0       | 0                      | 0        | 0        | 0        | 0        |
| 0                 | 0      | 0      | 0      | 0       | 0                      | 0        | 0        | 0        | 0        |
| 0                 | 0      | 0      | 0      | 0       | 0                      | 0        | 0        | 0        | 0        |
| -77.23            | -65.48 | -57.63 | -64.73 | -63.27  | -79.8327               | -67.6867 | -59.5721 | -66.9114 | -65.4022 |
| -77.22            | -65.23 | -56.76 | -64.72 | -63.26  | -79.8223               | -67.4283 | -58.6728 | -66.9011 | -65.3919 |
| -18.92            | -41.12 | -33.74 | -39.23 | -34.67  | -19.5576               | -42.5057 | -34.877  | -40.5521 | -35.8384 |
| 14.27             | -17.83 | 16.75  | -15.43 | -8.99   | 14.7509                | -18.4309 | 17.31448 | -15.95   | -9.29296 |
| 29.97             | 21.73  | 33.59  | 23.81  | 27.21   | 30.97999               | 22.4623  | 34.72198 | 24.6124  | 28.12698 |
| 30                | 21.87  | 33.78  | 23.81  | 27.21   | 31.011                 | 22.60702 | 34.91839 | 24.6124  | 28.12698 |
| 45.56             | 36.6   | 45.62  | 37.35  | 38.82   | 47.09537               | 37.83342 | 47.15739 | 38.6087  | 40.12823 |
| 48.39             | 49.48  | 53.19  | 49.49  | 49.38   | 50.02074               | 51.14748 | 54.9825  | 51.15781 | 51.04411 |
| 54.77             | 57.95  | 66.95  | 58.33  | 58.72   | 56.61575               | 59.90292 | 69.20622 | 60.29572 | 60.69886 |
| 54.78             | 58.05  | 67.02  | 58.33  | 58.73   | 56.62609               | 60.00629 | 69.27857 | 60.29572 | 60.7092  |
| 61.79             | 61.66  | 67.16  | 61.89  | 62.37   | 63.87232               | 63.73794 | 69.42329 | 63.97569 | 64.47187 |
| 67.81             | 65.14  | 70.84  | 65.61  | 66.55   | 70.0952                | 67.33522 | 73.22731 | 67.82106 | 68.79274 |
| 67.81             | 65.17  | 70.9   | 65.61  | 66.56   | 70.0952                | 67.36623 | 73.28933 | 67.82106 | 68.80307 |
| 68.98             | 68.78  | 71.51  | 68.76  | 68.57   | 71.30463               | 71.09789 | 73.91989 | 71.07721 | 70.88081 |
| 69.5              | 71.46  | 80.26  | 71.44  | 71.27   | 71.84215               | 73.8682  | 82.96476 | 73.84753 | 73.6718  |
| 72.68             | 71.53  | 80.42  | 71.44  | 71.28   | 75.12932               | 73.94056 | 83.13015 | 73.84753 | 73.68214 |
| 72.7              | 72.42  | 82.07  | 72.3   | 71.87   | 75.14999               | 74.86055 | 84.83576 | 74.73651 | 74.29202 |
| 83.51             | 85.21  | 93.34  | 85.09  | 84.74   | 86.32429               | 88.08158 | 96.48556 | 87.95753 | 87.59574 |
| 86                | 90.26  | 94.08  | 90.27  | 90.36   | 88.8982                | 93.30176 | 97.2505  | 93.3121  | 93.40513 |
| 86.84             | 90.71  | 96.01  | 90.71  | 90.72   | 89.76651               | 93.76693 | 99.24554 | 93.76693 | 93.77726 |

|        |        |        |        |        |          |          |          |          |          |
|--------|--------|--------|--------|--------|----------|----------|----------|----------|----------|
| 90.35  | 92.04  | 98.45  | 91.86  | 91.38  | 93.3948  | 95.14175 | 101.7678 | 94.95568 | 94.45951 |
| 91.92  | 96.87  | 101.23 | 96.7   | 96.19  | 95.0177  | 100.1345 | 104.6415 | 99.95879 | 99.4316  |
| 91.92  | 96.94  | 101.25 | 96.7   | 96.19  | 95.0177  | 100.2069 | 104.6621 | 99.95879 | 99.4316  |
| 99.28  | 100.02 | 102.96 | 100.01 | 99.97  | 102.6257 | 103.3907 | 106.4298 | 103.3803 | 103.339  |
| 99.29  | 102.57 | 104.46 | 102.46 | 102.09 | 102.6361 | 106.0266 | 107.9803 | 105.9129 | 105.5304 |
| 101.25 | 102.62 | 104.55 | 102.46 | 102.1  | 104.6621 | 106.0783 | 108.0733 | 105.9129 | 105.5408 |
| 121.79 | 115.79 | 118.47 | 116.06 | 116.73 | 125.8943 | 119.6921 | 122.4624 | 119.9712 | 120.6638 |
| 133.43 | 132.88 | 135.05 | 132.92 | 133.07 | 137.9266 | 137.3581 | 139.6012 | 137.3994 | 137.5545 |
| 137.05 | 132.88 | 135.06 | 132.92 | 133.07 | 141.6686 | 137.3581 | 139.6115 | 137.3994 | 137.5545 |
| 137.06 | 135.1  | 136.71 | 135.05 | 134.89 | 141.6789 | 139.6529 | 141.3171 | 139.6012 | 139.4358 |
| 146.75 | 143.21 | 144.7  | 143.13 | 143.01 | 151.6955 | 148.0362 | 149.5764 | 147.9535 | 147.8294 |
| 165.16 | 169.66 | 172.05 | 169.95 | 169.6  | 170.7259 | 175.3775 | 177.8481 | 175.6773 | 175.3155 |
| 170.88 | 169.66 | 172.79 | 169.95 | 170.55 | 176.6387 | 175.3775 | 178.613  | 175.6773 | 176.2975 |
| 170.89 | 170.3  | 172.8  | 170.12 | 170.55 | 176.649  | 176.0391 | 178.6234 | 175.853  | 176.2975 |
| 174.78 | 174.48 | 176.65 | 174.65 | 175.01 | 180.6701 | 180.36   | 182.6031 | 180.5357 | 180.9078 |
| 186.17 | 188.33 | 189.88 | 188.22 | 187.82 | 192.4439 | 194.6767 | 196.279  | 194.563  | 194.1495 |
| 186.18 | 188.35 | 190.11 | 188.22 | 187.82 | 192.4543 | 194.6974 | 196.5167 | 194.563  | 194.1495 |
| 192.52 | 195.01 | 197.02 | 195.03 | 194.98 | 199.0079 | 201.5818 | 203.6596 | 201.6025 | 201.5508 |
| 200.58 | 206.21 | 209.68 | 206.42 | 206.79 | 207.3395 | 213.1593 | 216.7462 | 213.3764 | 213.7588 |
| 200.58 | 212.24 | 214.39 | 212.11 | 211.49 | 207.3395 | 219.3925 | 221.6149 | 219.2581 | 218.6172 |
| 201.22 | 212.25 | 214.59 | 212.11 | 211.49 | 208.0011 | 219.4028 | 221.8217 | 219.2581 | 218.6172 |
| 208.37 | 216.77 | 220.43 | 216.68 | 216.4  | 215.3921 | 224.0751 | 227.8585 | 223.9821 | 223.6927 |
| 232.26 | 236.79 | 237.77 | 236.56 | 235.98 | 240.0872 | 244.7698 | 245.7828 | 244.5321 | 243.9325 |
| 269.18 | 270.14 | 273.81 | 270.3  | 270.6  | 278.2514 | 279.2437 | 283.0374 | 279.4091 | 279.7192 |
| 339.38 | 341.27 | 343.05 | 341.04 | 340.45 | 350.8171 | 352.7708 | 354.6108 | 352.533  | 351.9232 |
| 339.39 | 341.28 | 343.14 | 341.04 | 340.45 | 350.8274 | 352.7811 | 354.7038 | 352.533  | 351.9232 |
| 368.33 | 370.71 | 374.18 | 370.6  | 370.27 | 380.7427 | 383.2029 | 386.7899 | 383.0892 | 382.7481 |
| 370.17 | 373.84 | 375.54 | 373.47 | 372.53 | 382.6447 | 386.4384 | 388.1957 | 386.0559 | 385.0843 |
| 392.42 | 389.76 | 395.36 | 389.95 | 390.09 | 405.6446 | 402.8949 | 408.6836 | 403.0913 | 403.236  |
| 392.42 | 389.78 | 395.46 | 389.95 | 390.09 | 405.6446 | 402.9156 | 408.787  | 403.0913 | 403.236  |
| 398.51 | 396.08 | 401.8  | 396.34 | 396.93 | 411.9398 | 409.4279 | 415.3407 | 409.6967 | 410.3065 |
| 403.03 | 400.95 | 405.25 | 401.09 | 401.43 | 416.6121 | 414.462  | 418.9069 | 414.6067 | 414.9582 |
| 403.04 | 400.96 | 405.29 | 401.09 | 401.43 | 416.6224 | 414.4724 | 418.9483 | 414.6067 | 414.9582 |
| 405.36 | 404.66 | 411.27 | 404.77 | 404.87 | 419.0206 | 418.297  | 425.1298 | 418.4107 | 418.5141 |
| 414.82 | 413.27 | 415.28 | 413.17 | 412.93 | 428.7994 | 427.1972 | 429.2749 | 427.0938 | 426.8457 |
| 434.36 | 433.4  | 437.19 | 433.48 | 433.77 | 448.9979 | 448.0056 | 451.9233 | 448.0883 | 448.388  |
| 434.37 | 433.41 | 437.26 | 433.48 | 433.77 | 449.0083 | 448.0159 | 451.9957 | 448.0883 | 448.388  |
| 447.2  | 449.26 | 451.93 | 448.93 | 447.88 | 462.2706 | 464.4001 | 467.16   | 464.0589 | 462.9736 |
| 447.2  | 449.28 | 451.96 | 449.13 | 448.83 | 462.2706 | 464.4207 | 467.1911 | 464.2657 | 463.9556 |
| 449.99 | 449.29 | 453.54 | 449.13 | 448.85 | 465.1547 | 464.4311 | 468.8243 | 464.2657 | 463.9762 |
| 453.94 | 456.43 | 459.94 | 456.37 | 456.24 | 469.2378 | 471.8117 | 475.44   | 471.7497 | 471.6153 |
| 458.14 | 460.33 | 464.47 | 459.86 | 458.86 | 473.5793 | 475.8431 | 480.1226 | 475.3573 | 474.3236 |
| 458.33 | 460.36 | 464.92 | 459.86 | 458.89 | 473.7757 | 475.8741 | 480.5878 | 475.3573 | 474.3546 |
| 458.33 | 462.12 | 466.99 | 461.99 | 461.8  | 473.7757 | 477.6934 | 482.7276 | 477.5591 | 477.3627 |
| 462.58 | 465.64 | 468.93 | 465.2  | 465.02 | 478.1689 | 481.3321 | 484.7329 | 480.8772 | 480.6912 |
| 468.9  | 465.78 | 470.85 | 466.07 | 466.74 | 484.7019 | 481.4768 | 486.7176 | 481.7766 | 482.4691 |
| 471.27 | 472.05 | 476.68 | 471.85 | 471.46 | 487.1518 | 487.9581 | 492.7441 | 487.7513 | 487.3482 |
| 482.46 | 486.78 | 489.56 | 486.51 | 485.9  | 498.7189 | 503.1845 | 506.0582 | 502.9054 | 502.2748 |
| 483.18 | 487.19 | 489.99 | 486.79 | 486.05 | 499.4632 | 503.6083 | 506.5027 | 503.1948 | 502.4299 |
| 495.79 | 501.27 | 503.6  | 500.91 | 500.07 | 512.4981 | 518.1628 | 520.5713 | 517.7907 | 516.9224 |
| 521.45 | 519.5  | 525.65 | 519.8  | 520.4  | 539.0229 | 537.0072 | 543.3644 | 537.3173 | 537.9375 |
| 521.46 | 519.5  | 525.73 | 519.8  | 520.4  | 539.0332 | 537.0072 | 543.4471 | 537.3173 | 537.9375 |
| 525.52 | 521.77 | 527    | 522.09 | 522.79 | 543.23   | 539.3536 | 544.7599 | 539.6844 | 540.408  |
| 528.06 | 529.16 | 533.97 | 529.07 | 528.89 | 545.8556 | 546.9927 | 551.9648 | 546.8997 | 546.7136 |
| 544.15 | 542.76 | 547.47 | 543.28 | 544.29 | 562.4879 | 561.051  | 565.9197 | 561.5885 | 562.6326 |
| 544.16 | 542.76 | 547.5  | 543.28 | 544.29 | 562.4982 | 561.051  | 565.9508 | 561.5885 | 562.6326 |
| 552.92 | 553.36 | 557.56 | 553.47 | 553.76 | 571.5534 | 572.0082 | 576.3498 | 572.1219 | 572.4217 |
| 556.73 | 557.75 | 561.21 | 558.17 | 558.58 | 575.4918 | 576.5462 | 580.1228 | 576.9803 | 577.4041 |
| 556.73 | 557.76 | 561.28 | 558.17 | 558.58 | 575.4918 | 576.5565 | 580.1951 | 576.9803 | 577.4041 |

|         |         |         |         |         |          |          |          |          |          |
|---------|---------|---------|---------|---------|----------|----------|----------|----------|----------|
| 557.42  | 558.87  | 562.96  | 559     | 559.51  | 576.2051 | 577.7039 | 581.9318 | 577.8383 | 578.3655 |
| 557.42  | 558.88  | 563.03  | 559     | 559.51  | 576.2051 | 577.7143 | 582.0041 | 577.8383 | 578.3655 |
| 568.07  | 565.44  | 569.12  | 566.48  | 568.11  | 587.214  | 584.4953 | 588.2993 | 585.5704 | 587.2553 |
| 573.32  | 569.85  | 574.81  | 570.64  | 572.3   | 592.6409 | 589.0539 | 594.1811 | 589.8706 | 591.5865 |
| 576.91  | 577.56  | 581.35  | 577.8   | 578.28  | 596.3519 | 597.0238 | 600.9415 | 597.2719 | 597.768  |
| 576.97  | 577.56  | 581.42  | 577.8   | 578.28  | 596.4139 | 597.0238 | 601.0139 | 597.2719 | 597.768  |
| 576.98  | 578.87  | 581.85  | 579.02  | 579.34  | 596.4242 | 598.3779 | 601.4583 | 598.533  | 598.8638 |
| 593.03  | 587.53  | 590.75  | 588.57  | 590.7   | 613.0151 | 607.3298 | 610.6583 | 608.4048 | 610.6066 |
| 619.85  | 616.97  | 620.62  | 618     | 620.11  | 640.7389 | 637.7619 | 641.5349 | 638.8266 | 641.0077 |
| 621.11  | 618.43  | 620.64  | 619.05  | 620.28  | 642.0414 | 639.2711 | 641.5556 | 639.912  | 641.1834 |
| 621.11  | 618.44  | 621.22  | 619.05  | 620.29  | 642.0414 | 639.2814 | 642.1551 | 639.912  | 641.1938 |
| 625.21  | 620.32  | 622.46  | 621.25  | 623.19  | 646.2796 | 641.2248 | 643.4369 | 642.1861 | 644.1915 |
| 647.33  | 647.06  | 649.76  | 647.17  | 647.4   | 669.145  | 668.8659 | 671.6569 | 668.9796 | 669.2174 |
| 769.55  | 777.29  | 784.2   | 778.3   | 780.06  | 795.4838 | 803.4847 | 810.6275 | 804.5287 | 806.348  |
| 769.55  | 777.29  | 784.24  | 778.3   | 780.06  | 795.4838 | 803.4847 | 810.6689 | 804.5287 | 806.348  |
| 811.42  | 809.48  | 818.07  | 811.29  | 814.96  | 838.7649 | 836.7595 | 845.639  | 838.6305 | 842.4242 |
| 1888.88 | 1860.49 | 1872.57 | 1867.97 | 1883.74 | 1952.535 | 1923.189 | 1935.676 | 1930.921 | 1947.222 |
| 1888.88 | 1860.49 | 1872.59 | 1867.97 | 1883.74 | 1952.535 | 1923.189 | 1935.696 | 1930.921 | 1947.222 |
| 1894.85 | 1869.34 | 1881.08 | 1876.91 | 1892.14 | 1958.706 | 1932.337 | 1944.472 | 1940.162 | 1955.905 |
| 1895.44 | 1879.88 | 1889.21 | 1884.84 | 1896    | 1959.316 | 1943.232 | 1952.876 | 1948.359 | 1959.895 |
| 1973.87 | 1970.45 | 1973.53 | 1973.33 | 1980.03 | 2040.389 | 2036.854 | 2040.038 | 2039.831 | 2046.757 |
| 1984.53 | 1978.7  | 1982.91 | 1982.48 | 1990.1  | 2051.409 | 2045.382 | 2049.734 | 2049.29  | 2057.166 |
| 1984.53 | 1978.7  | 1982.95 | 1982.48 | 1990.1  | 2051.409 | 2045.382 | 2049.775 | 2049.29  | 2057.166 |
| 1997.62 | 1987.28 | 1992.83 | 1991.79 | 2001.84 | 2064.94  | 2054.251 | 2059.988 | 2058.913 | 2069.302 |
| 2000.36 | 1987.29 | 1992.87 | 1991.79 | 2001.84 | 2067.772 | 2054.262 | 2060.03  | 2058.913 | 2069.302 |
| 2000.37 | 1987.79 | 1994.55 | 1993.75 | 2002.47 | 2067.782 | 2054.779 | 2061.766 | 2060.939 | 2069.953 |
| 2008.06 | 1991.11 | 1995.63 | 1994.66 | 2006.56 | 2075.732 | 2058.21  | 2062.883 | 2061.88  | 2074.181 |
| 2016.9  | 1998.75 | 2006.61 | 2006.83 | 2019.46 | 2084.87  | 2066.108 | 2074.233 | 2074.46  | 2087.516 |
| 2026.99 | 1998.75 | 2006.69 | 2006.83 | 2023.3  | 2095.3   | 2066.108 | 2074.315 | 2074.46  | 2091.485 |
| 2026.99 | 2005.85 | 2010.62 | 2010.13 | 2023.3  | 2095.3   | 2073.447 | 2078.378 | 2077.871 | 2091.485 |
| 2030.92 | 2011.63 | 2017.11 | 2018.1  | 2031.24 | 2099.362 | 2079.422 | 2085.087 | 2086.11  | 2099.693 |
| 2072.43 | 2086.7  | 2081.24 | 2087.36 | 2088.89 | 2142.271 | 2157.022 | 2151.378 | 2157.704 | 2159.286 |

**Table S26.** Full coordinates of gas-phase modeled geometry of **2**, given in 12-digit standard format, in Angstroms.

|    |                 |                 |                |
|----|-----------------|-----------------|----------------|
| Fe | 8.786777000000  | 2.928929000000  | 6.096250000000 |
| Fe | 10.119780000000 | 1.595914000000  | 4.395807000000 |
| C  | 7.849094000000  | 1.991243000000  | 7.299766000000 |
| O  | 7.250014000000  | 1.392162000000  | 8.079905000000 |
| C  | 10.289722000000 | 1.425981000000  | 6.237749000000 |
| O  | 10.810738000000 | 0.904968000000  | 7.146494000000 |
| C  | 11.814332000000 | 1.562356000000  | 3.898548000000 |
| O  | 12.915748000000 | 1.495910000000  | 3.557691000000 |
| C  | 8.786774000000  | 2.928924000000  | 4.216575000000 |
| Fe | 7.453764000000  | 4.261931000000  | 4.395809000000 |
| C  | 9.724468000000  | 3.866616000000  | 7.299759000000 |
| O  | 10.323552000000 | 4.465699000000  | 8.079894000000 |
| C  | 7.283833000000  | 4.431871000000  | 6.237752000000 |
| O  | 6.762819000000  | 4.952888000000  | 7.146497000000 |
| C  | 5.759208000000  | 4.295495000000  | 3.898559000000 |
| O  | 4.657790000000  | 4.361945000000  | 3.557710000000 |
| Fe | 8.786774000000  | 2.928922000000  | 2.336900000000 |
| Fe | 7.453765000000  | 1.595917000000  | 4.037339000000 |
| C  | 9.724466000000  | 1.991239000000  | 1.133388000000 |
| O  | 10.323550000000 | 1.392159000000  | 0.353252000000 |
| C  | 7.283833000000  | 1.425983000000  | 2.195394000000 |
| O  | 6.762818000000  | 0.904966000000  | 1.286650000000 |
| C  | 5.759210000000  | 1.562354000000  | 4.534591000000 |
| O  | 4.657793000000  | 1.495903000000  | 4.875443000000 |
| Fe | 10.119781000000 | 4.261933000000  | 4.037344000000 |
| C  | 7.849092000000  | 3.866613000000  | 1.133386000000 |
| O  | 7.250013000000  | 4.465696000000  | 0.353248000000 |
| C  | 10.289723000000 | 4.431872000000  | 2.195405000000 |
| O  | 10.810738000000 | 4.952885000000  | 1.286658000000 |
| C  | 11.814334000000 | 4.295493000000  | 4.534602000000 |
| O  | 12.915751000000 | 4.361939000000  | 4.875458000000 |
| C  | 7.420203000000  | -0.098637000000 | 4.534594000000 |
| O  | 7.353754000000  | -1.200054000000 | 4.875447000000 |
| C  | 10.153342000000 | 5.956487000000  | 4.534599000000 |
| O  | 10.219789000000 | 7.057904000000  | 4.875452000000 |
| C  | 10.153343000000 | -0.098641000000 | 3.898556000000 |
| O  | 10.219793000000 | -1.200059000000 | 3.557706000000 |
| C  | 7.420204000000  | 5.956483000000  | 3.898549000000 |
| O  | 7.353757000000  | 7.057900000000  | 3.557693000000 |

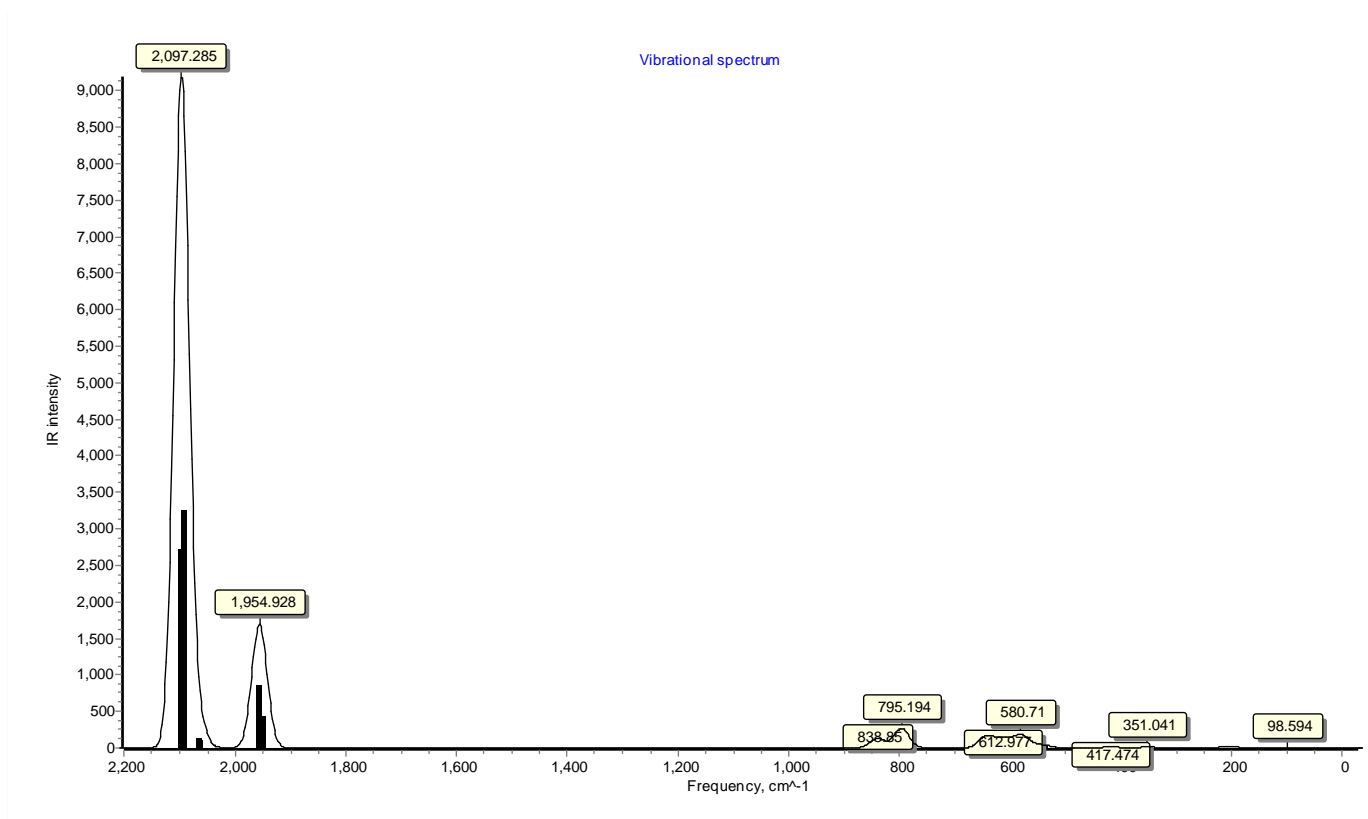

**Figure S62.** IR activities of gas phase model of **2** with scaling factor.

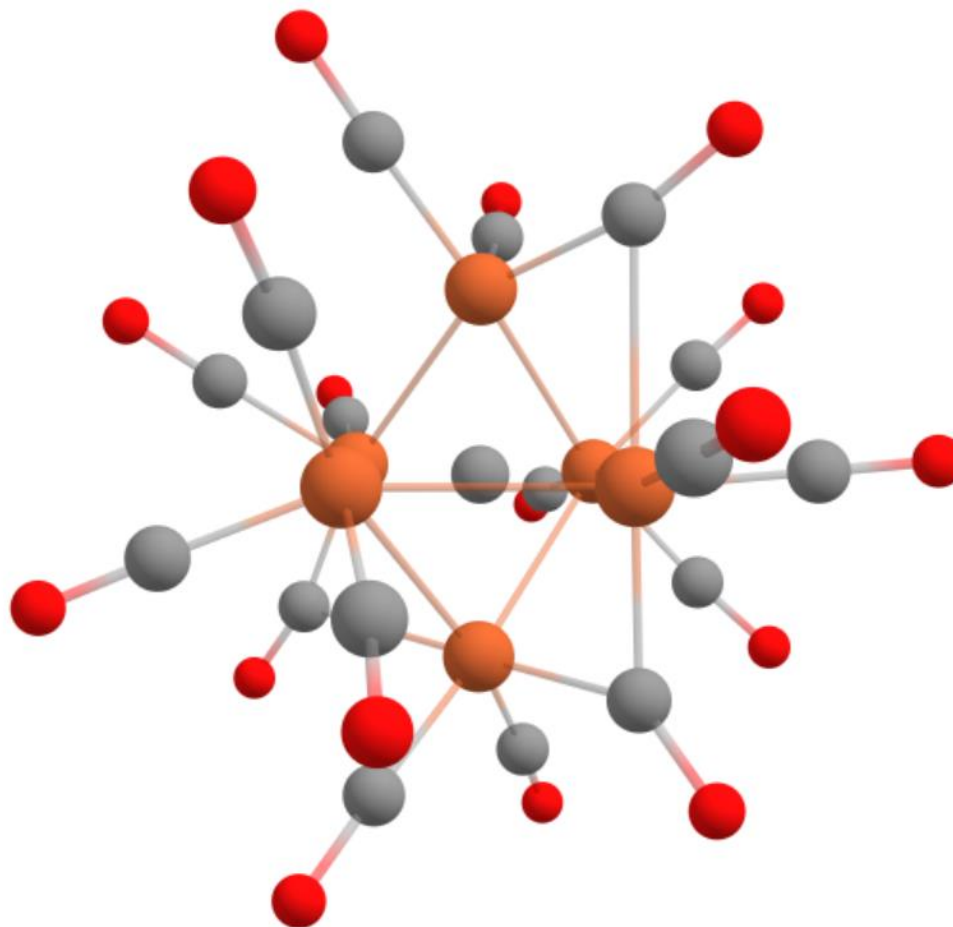

**Figure S63.** Optimized gas-phase geometry of **3**, BP86 ma-def2-TZVP-D4.

RMSD value of gas-phase versus crystal structure (core A) **3**, unweighted: 3.96958539990249; weighted: 1.52554956383366.

**Table S27.** Full coordinates of gas-phase modeled geometry of **3**, given in 12-digit standard format, in Angstroms.

|    |                 |                 |                 |
|----|-----------------|-----------------|-----------------|
| Fe | -1.604759000000 | 0.576040000000  | 2.574704000000  |
| Fe | 0.042676000000  | 1.986483000000  | 4.190714000000  |
| Fe | -2.088918000000 | 3.286019000000  | 5.165049000000  |
| O  | -1.841447000000 | 5.926771000000  | 3.872337000000  |
| O  | 0.429950000000  | -1.468140000000 | 3.071074000000  |
| O  | -0.686181000000 | 1.506618000000  | -0.058410000000 |
| O  | 1.409400000000  | 4.504702000000  | 4.806434000000  |
| O  | 2.239016000000  | 1.361467000000  | 2.333270000000  |
| O  | -4.485342000000 | 4.495975000000  | 6.339354000000  |
| O  | -3.056957000000 | -1.631605000000 | 1.284886000000  |
| O  | 1.371934000000  | 0.803281000000  | 6.524793000000  |
| O  | -0.582412000000 | 4.391659000000  | 7.431399000000  |
| C  | -1.841452000000 | 4.749301000000  | 3.872330000000  |
| C  | -1.841452000000 | 1.934261000000  | 3.872325000000  |
| C  | 0.768665000000  | 1.186695000000  | 5.610548000000  |
| C  | 0.811468000000  | 3.536219000000  | 4.585570000000  |
| C  | -3.556076000000 | 4.002558000000  | 5.848591000000  |
| C  | -2.527396000000 | -0.733919000000 | 1.790515000000  |
| C  | -1.078078000000 | 1.335992000000  | 1.025771000000  |
| C  | -1.148885000000 | 3.965479000000  | 6.513051000000  |
| C  | 1.356161000000  | 1.577432000000  | 3.050624000000  |
| C  | -0.339565000000 | -0.612054000000 | 2.906566000000  |
| Fe | -2.078136000000 | 0.576038000000  | 5.169948000000  |
| Fe | -3.725579000000 | 1.986469000000  | 3.553937000000  |
| Fe | -1.593997000000 | 3.286027000000  | 2.579611000000  |
| O  | -4.112846000000 | -1.468144000000 | 4.673589000000  |
| O  | -2.996711000000 | 1.506617000000  | 7.803061000000  |
| O  | -5.092297000000 | 4.504692000000  | 2.938230000000  |
| O  | -5.921912000000 | 1.361477000000  | 5.411396000000  |
| O  | 0.802434000000  | 4.495963000000  | 1.405300000000  |
| O  | -0.625947000000 | -1.631608000000 | 6.459777000000  |

|   |                 |                 |                |
|---|-----------------|-----------------|----------------|
| O | -5.054862000000 | 0.803267000000  | 1.219872000000 |
| O | -3.100473000000 | 4.391688000000  | 0.313252000000 |
| C | -4.451585000000 | 1.186683000000  | 2.134110000000 |
| C | -4.494362000000 | 3.536209000000  | 3.159086000000 |
| C | -0.126835000000 | 4.002553000000  | 1.896068000000 |
| C | -1.155507000000 | -0.733923000000 | 5.954144000000 |
| C | -2.604817000000 | 1.336000000000  | 6.718877000000 |
| C | -2.534015000000 | 3.965497000000  | 1.231603000000 |
| C | -5.039059000000 | 1.577430000000  | 4.694036000000 |
| C | -3.343333000000 | -0.612055000000 | 4.838092000000 |

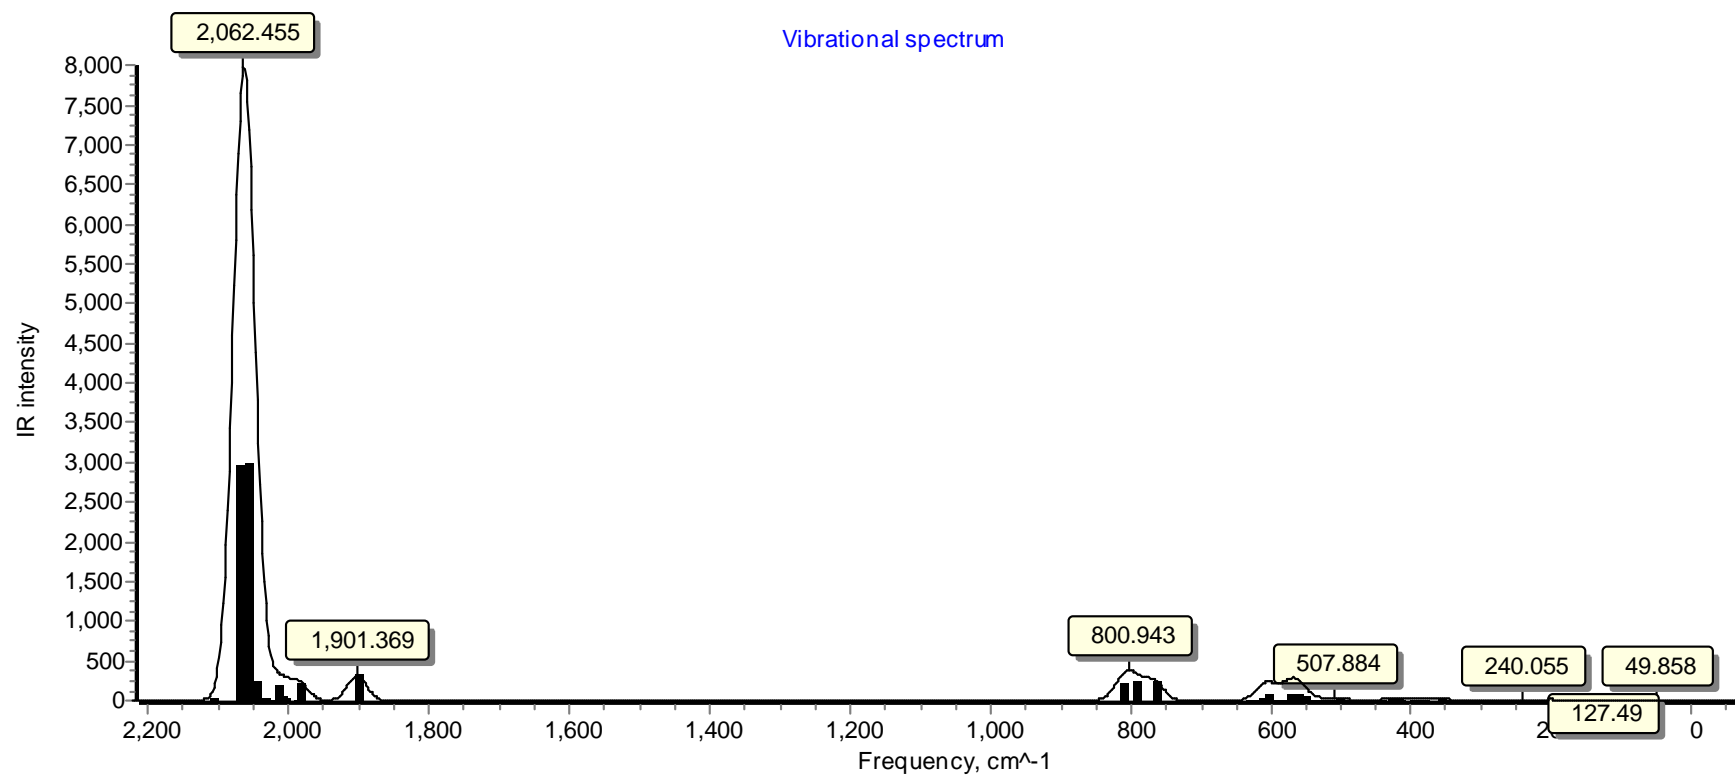

**Figure S64.** IR activities of gas phase model of **3** without scaling factor. Experimental values: 2096(w), 2023 (s), 1829(m).

## Supporting Information References

- 1 S. Kuppuswamy, J. D. Wofford, C. Joseph, Z. L. Xie, A. K. Ali, V. M. Lynch, P. A. Lindahl and M. J. Rose, *Inorg. Chem.*, 2017, **56**, 5998–6012.
- 2 G. R. Fulmer, A. J. M. Miller, N. H. Sherden, H. E. Gottlieb, A. Nudelman, B. M. Stoltz, J. E. Bercaw and K. I. Goldberg, *Organometallics*, 2010, **29**, 2176–2179.
- 3 Y. Jeannin and A. Gourdon, *J. Organomet. Chem.*, 1990, **388**, 195–202.
- 4 C. G. Cooke and M. J. Mays, *J. Organomet. Chem.*, 1975, **88**, 231–236.
- 5 J. S. Bradley, G. B. Ansell, M. E. Leonowicz and E. W. Hill, *J. Am. Chem. Soc.*, 1981, **103**, 4968–4970.
- 6 A. Taheri and L. A. Berben, *Inorg. Chem.*, 2016, **55**, 378–385.
- 7 C. F. Macrae, I. Sovago, S. J. Cottrell, P. T. A. Galek, P. McCabe, E. Pidcock, M. Platings, G. P. Shields, J. S. Stevens, M. Towler and P. A. Wood, *J. Appl. Crystallogr.*, 2020, **53**, 226–235.
- 8 2022.
- 9 W. A. Paciorek, M. Meyer and G. Chapuis, *Acta Crystallogr. Sect. A Found. Crystallogr.*, 1999, **55**, 543–557.
- 10 O. V. Dolomanov, L. J. Bourhis, R. J. Gildea, J. A. K. Howard and H. Puschmann, *J. Appl. Crystallogr.*, 2009, **42**, 339–341.
- 11 G. M. Sheldrick, *Acta Crystallogr. Sect. A Found. Adv.*, 2015, **71**, 3–8.
- 12 G. M. Sheldrick, *Acta Crystallogr. Sect. C Struct. Chem.*, 2015, **71**, 3–8.
- 13 E. Prince, Ed., *International Tables for Crystallography*, International Union of Crystallography, Chester, England, 2006, vol. C.
- 14 S. Parsons, H. D. Flack and T. Wagner, *Acta Crystallogr. Sect. B Struct. Sci. Cryst. Eng. Mater.*, 2013, **69**, 249–259.
- 15  $R_w(F^2) = \{w(|F_o|^2 - |F_c|^2)^2/w(|F_o|^4)\}^{1/2}$  where  $w$  is the weight given each reflection.  
 $R(F) = (|F_o| - |F_c|)/|F_o|$  for reflections with  $F_o > 4(F_c)$ .  
 $S = [w(|F_o|^2 - |F_c|^2)^2/(n - p)]^{1/2}$ , where  $n$  is the number of reflections and  $p$  is the number of refined parameters.
- 16 F. Neese, *WIREs Comput. Mol. Sci.*, 2018, **8**, 1–15.
- 17 F. Neese, 2022, 1–15.
- 18 ChemCraft, <https://www.chemcraftprog.com>.
- 19 V. Vennelakanti, A. Nandy and H. J. Kulik, *Top. Catal.*, 2022, **65**, 296–311.
- 20 K. A. Moltved and K. P. Kepp, *J. Chem. Theory Comput.*, 2018, **14**, 3479–3492.
- 21 A. Jaoul, G. Nocton and C. Clavaguéra, *ChemPhysChem*, 2017, **18**, 2688–2696.
- 22 J. B. Foresman and Ae. Frisch, *Exploring Chemistry With Electronic Structure Methods: A Guide*

- to *Using Gaussian*, Gaussian, Inc., Pittsburgh, PA, 2nd edn., 1996.
- 23 R. D. JohnsonIII, Ed., in *NIST Standard Reference Database Number 101*, 2022.
- 24 M. K. Kesharwani, B. Brauer and J. M. L. L. Martin, *J. Phys. Chem. A*, 2015, **119**, 1701–1714.
- 25 J. P. Merrick, D. Moran and L. Radom, *J. Phys. Chem. A*, 2007, **111**, 11683–11700.
- 26 M. Bortoluzzi, I. Ciabatti, C. Cesari, C. Femoni, M. C. Iapalucci and S. Zacchini, *Eur. J. Inorg. Chem.*, 2017, **2017**, 3135–3143.
- 27 C. Joseph, S. Kuppuswamy, V. M. Lynch and M. J. Rose, *Inorg. Chem.*, 2018, **57**, 20–23.
- 28 E. H. Braye, L. F. Dahl, W. Hübel, D. L. Wampler, W. Hubel and D. L. Wampler, *J. Am. Chem. Soc.*, 1962, **84**, 4633–4639.
- 29 M. U. Delgado-Jaime, B. R. Dible, K. P. Chiang, W. W. Brennessel, U. Bergmann, P. L. Holland and S. DeBeer, *Inorg. Chem.*, 2011, **50**, 10709–10717.
