# Supplementary material for: Multi-phosphine-chelated iron-carbide clusters via redox-promoted ligand exchange on an inert hexa-iron-carbide carbonyl cluster, [Fe6(μ6-C)(μ2-CO)4(CO)12]2−
Source: Royal Society of Chemistry journal article supplement (doi:10.1039/d4sc01370k), 2024-01-01
Supplement: d4sc01370k2.pdf [file d4sc01370k2.pdf]

*Supporting Information Part II for:*

**Multi-Phosphine-Chelated Iron-Carbide Clusters via  
Redox-Promoted Ligand Exchange on an Inert Hexa-Iron-  
Carbide Carbonyl Cluster,  $[\text{Fe}_6(\mu_6\text{-C})(\mu_2\text{-CO})_4(\text{CO})_{12}]^{2-}$**

Caitlyn R. Cobb, Ren K. Ngo, Emily J. Dick, Vincent M. Lynch  
and Michael J. Rose\*

*Department of Chemistry, The University of Texas at Austin  
Austin, TX 78712 USA*

| <b>Contents – Selected Input Files for Computational Analysis</b>  | <b>Page</b> |
|--------------------------------------------------------------------|-------------|
| <b>Input File for C-PCM (DCE) Study of Validation Cluster</b>      | <b>2-4</b>  |
| <b>Input File of Gas-Phase Model of 2</b>                          | <b>5-6</b>  |
| <b>Input File of Frequency Calculation of Optimized Model of 3</b> | <b>7</b>    |

## C-PCM model of Fe5

---

---

### INPUT FILE

---

---

NAME = Fe5\_BP86\_TZ\_D4\_DCE.inp

| 1> !BP86 ma-def2-SVP def2/J RijCosX LargePrint

| 2>

| 3> #SCF

| 4> !verytightSCF DEFGRID2 KDIIS NOSOSCF TIGHTOPT D4 NumFreq

| 5>

| 6> %scf

| 7> MaxIter 100000

| 8> SOSCFStart 0.00033

| 9> end

| 10>

| 11> %cpcm

| 12> smd true

| 13> SMDsolvent "1,2-DICHLOROETHANE"

| 14> end

| 15>

| 16> #nprocs

| 17> %PAL NPROCS 48 end

| 18>

| 19> %method

| 20> Z\_solver Pople

| 21> Z\_MaxIter 3000

| 22> end

| 23>

```

| 24> # charge analyses
| 25> ! MULLIKEN
| 26> ! LOEWDIN
| 27>
| 28> %output
| 29>   Print[P_Basis] 5
| 30>   Print[P_MOs] 1
| 31>   Print[P_Mulliken] 1
| 32>   Print[P_Loewdin] 1
| 33> end
| 34>
| 35> * xyz 0 1
| 36> C 11.07478929185126 -0.30313363407221 4.00075987851672
| 37> C 12.71383755903513 2.62879634263514 4.55858983668477
| 38> C 10.54248942316409 2.31220556211306 5.78282358065967
| 39> C 12.34865403144072 0.68230060671600 6.49455843657446
| 40> C 14.20823907203956 0.28523903285433 4.16887072504836
| 41> C 13.32949337408001 -2.08391260209270 4.61956994242571
| 42> C 13.85260902438712 -1.16391854222115 2.12019239683611
| 43> C 10.12185858296032 -2.96848033903685 4.18557884116730
| 44> C 11.63741068358602 -2.81703069945544 2.08116333666846
| 45> C 9.21098155104056 -2.29644006765723 1.78527330471099
| 46> C 7.89010256663446 -0.57284247887523 3.48620756708578
| 47> C 8.26064557038337 1.69154810590612 4.39527766257863
| 48> C 8.89294452829639 -0.41911791886422 5.90449160298954
| 49> C 12.55851325529056 1.48492256840201 1.71891255974399
| 50> C 10.56253052449420 0.08404252158514 0.82809655182070
| 51> C 10.10512000076226 2.27268448442193 2.22280644941361
| 52> Fe 11.66065713505835 1.22221057040351 4.94024405266889 newGTO "ma-def2-TZVP" end
| 53> Fe 12.87318660353608 -0.72175098360757 3.56565994284733 newGTO "ma-def2-TZVP" end
| 54> Fe 10.49218407195726 -1.75959460314377 2.93704960923732 newGTO "ma-def2-TZVP" end
| 55> Fe 9.27269504006693 0.20933430003105 4.28077449934449 newGTO "ma-def2-TZVP" end

```

| 56> Fe 11.06598511218787 0.77906188069523 2.39103962370227 newGTO "ma-def2-TZVP" end  
| 57> O 13.34699046244165 3.57029276482883 4.35317266524697  
| 58> O 9.96116254502790 3.07422655474898 6.43237169603252  
| 59> O 12.79641921413875 0.33818909726267 7.50101743775056  
| 60> O 15.18487711105813 0.79937745905674 4.51638806107244  
| 61> O 13.63055355002915 -2.97047667334527 5.29323657374700  
| 62> O 14.52976562975313 -1.40940671434982 1.22102260085249  
| 63> O 9.87827538449850 -3.75716277568265 4.99049341846320  
| 64> O 12.24235177332062 -3.62357858553975 1.51380987275206  
| 65> O 8.44612679219386 -2.71478440442839 1.03330747015364  
| 66> O 6.89040846113921 -0.98717394321579 3.07681125412861  
| 67> O 7.53756576946578 2.58629594845880 4.45836760378555  
| 68> O 8.64484673239548 -0.81907017892971 6.95712204998074  
| 69> O 13.45304902406929 2.01571893351769 1.21112693048818  
| 70> O 10.28218824640140 -0.19945140731598 -0.26045589430113  
| 71> O 9.55979530181329 3.27290781819649 2.02168885912163  
| 72>  
| 73> \*

---

## Modeling of 2, gas phase input file

### INPUT FILE

```
=====
NAME = BP86_TZ_TZVP_D4_freq.inp
| 1> #this one is restricted (for our first geo opt attempt), larger on irons
| 2> #in summary: Fe6CO16, multiplicity 1, charge 0, BP86, firstgeo opt attempt from coordinates of first
|   optimized geometry for Fe62-, normal SCF
| 3>
| 4> !BP86 ma-def2-TZVP def2/J RijCosX LargePrint D4 NumFreq
| 5>
| 6> %scf
| 7>   MaxIter 100000
| 8>   SOSCFStart 0.00033
| 9> end
| 10>
| 11> %PAL NPROCS 48 end
| 12>
| 13> %method
| 14>   Z_solver Pople
| 15>   Z_MaxIter 3000
| 16> end
| 17>
| 18> %maxcore 3500
| 19> %output
| 20>   Print[P_Basis] 5
| 21>   Print[P_MOs] 1
| 22> end
| 23>
| 24> #Coordinates from ORCA-job BP86_NOSOSCF_TZVP_D4
| 25>
| 26> * xyz 0 1
| 27> Fe 8.78677708760399   2.92892872745673   6.09624980502840 newGTO "def2-TZVP" end
| 28> Fe 10.11978006899749   1.59591444332205   4.39580719660307 newGTO "def2-TZVP" end
| 29> C 7.84909375351062   1.99124269051433   7.29976601976119
| 30> O 7.25001373258023   1.39216163968973   8.07990490717669
| 31> C 10.28972217982573   1.42598087773525   6.23774871677079
| 32> O 10.81073820275375   0.90496815567379   7.14649410866173
| 33> C 11.81433216348871   1.56235628595832   3.89854774338802
| 34> O 12.91574849115769   1.49590984152814   3.55769110870827
| 35> C 8.78677351741413   2.92892442929753   4.21657482694071
| 36> Fe 7.45376382470363   4.26193093474185   4.39580887895620 newGTO "def2-TZVP" end
| 37> C 9.72446787116205   3.86661630295106   7.29975897933118
| 38> O 10.32355150059978   4.46569856955564   8.07989414346033
| 39> C 7.28383273007958   4.43187102264823   6.23775198886660
| 40> O 6.76281944274094   4.95288805009757   7.14649661367328
| 41> C 5.75920826058049   4.29549471200048   3.89855920871501
| 42> O 4.65779000708044   4.36194528230121   3.55770985916993
| 43> Fe 8.78677379322419   2.92892213817345   2.33689984686814 newGTO "def2-TZVP" end
```

```

|44> Fe 7.45376502612177 1.59591707714156 4.03733887945044 newGTO "def2-TZVP" end
|45> C 9.72446598290154 1.99123908715071 1.13338822511223
|46> O 10.32354991471624 1.39215884110867 0.35325173645902
|47> C 7.28383326605672 1.42598257817734 2.19539408888022
|48> O 6.76281786451110 0.90496613975516 1.28665020169881
|49> C 5.75921028661471 1.56235358220342 4.53459144326596
|50> O 4.65779257771016 1.49590308302743 4.87544258684980
|51> Fe 10.11978149501857 4.26193337742186 4.03734444693157 newGTO "def2-TZVP" end
|52> C 7.84909235262868 3.86661308885809 1.13338598148615
|53> O 7.25001299901323 4.46569636408407 0.35324829492756
|54> C 10.28972338619612 4.43187219284105 2.19540461649273
|55> O 10.81073769472181 4.95288511487402 1.28665849564616
|56> C 11.81433414790930 4.29549255255373 4.53460205881262
|57> O 12.91575078207085 4.36193942202371 4.87545758485767
|58> C 7.42020341346681 -0.09863673761497 4.53459407470668
|59> O 7.35375416852045 -1.20005394610094 4.87544716082474
|60> C 10.15334171611321 5.95648716554474 4.53459865686894
|61> O 10.21978937999622 7.05790447517807 4.87545178267026
|62> C 10.15334331305032 -0.09864064518047 3.89855633823820
|63> O 10.21979325796744 -1.20005862187641 3.55770593796136
|64> C 7.42020440053198 5.95648318463637 3.89854941042127
|65> O 7.35375694665849 7.05789952054713 3.55769304535768
|66> *
|67>
|68>
|69>
|70>
|71>
|72>
|73>

```

\*\*\*\*END OF INPUT\*\*\*\*

**Input file for freq. calculation of optimized geometry and optimized geometry coordinates for 3:**  
 !BP86 def2-SVP D4 NumFreq

```
%freq
  CentralDiff true # use central-differences (this is the default)
  Increment 0.005 # increment in bohr for the
                  # differentiation (default 0.005)
```

```
end
* xyz 0 1
Fe -1.604759000000  0.576040000000  2.574704000000
Fe  0.042676000000  1.986483000000  4.190714000000
Fe -2.088918000000  3.286019000000  5.165049000000
O  -1.841447000000  5.926771000000  3.872337000000
O   0.429950000000 -1.468140000000  3.071074000000
O  -0.686181000000  1.506618000000 -0.058410000000
O   1.409400000000  4.504702000000  4.806434000000
O   2.239016000000  1.361467000000  2.333270000000
O  -4.485342000000  4.495975000000  6.339354000000
O  -3.056957000000 -1.631605000000  1.284886000000
O   1.371934000000  0.803281000000  6.524793000000
O  -0.582412000000  4.391659000000  7.431399000000
C  -1.841452000000  4.749301000000  3.872330000000
C  -1.841452000000  1.934261000000  3.872325000000
C   0.768665000000  1.186695000000  5.610548000000
C   0.811468000000  3.536219000000  4.585570000000
C  -3.556076000000  4.002558000000  5.848591000000
C  -2.527396000000 -0.733919000000  1.790515000000
C  -1.078078000000  1.335992000000  1.025771000000
C  -1.148850000000  3.965479000000  6.513051000000
C   1.356161000000  1.577432000000  3.050624000000
C  -0.339565000000 -0.612054000000  2.906566000000
Fe -2.078136000000  0.576038000000  5.169948000000
Fe -3.725579000000  1.986469000000  3.553937000000
Fe -1.593997000000  3.286027000000  2.579611000000
O  -4.112846000000 -1.468144000000  4.673589000000
O  -2.996711000000  1.506617000000  7.803061000000
O  -5.092297000000  4.504692000000  2.938230000000
O  -5.921912000000  1.361477000000  5.411396000000
O   0.802434000000  4.495963000000  1.405300000000
O  -0.625947000000 -1.631608000000  6.459777000000
O  -5.054862000000  0.803267000000  1.219872000000
O  -3.100473000000  4.391688000000  0.313252000000
C  -4.451585000000  1.186683000000  2.134110000000
C  -4.494362000000  3.536209000000  3.159086000000
C  -0.126835000000  4.002553000000  1.896068000000
C  -1.155507000000 -0.733923000000  5.954144000000
C  -2.604817000000  1.336000000000  6.718877000000
C  -2.534015000000  3.965497000000  1.231603000000
C  -5.039059000000  1.577430000000  4.694036000000
C  -3.343333000000 -0.612055000000  4.838092000000
*
```
